# Supplementary material for: A miniDOAS instrument optimised for ammonia field measurements
Source: Copernicus journal article supplement (doi:10.5194/amt-9-2721-2016), 2016-06-29
Supplement: Supplementary file 1 [file amt-9-2721-2016-supplement.zip]

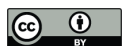

## *Supplement of*

# **A miniDOAS instrument optimised for ammonia field measurements**

**J. Sintermann et al.**

*Correspondence to:* Jörg Sintermann (sintermann@gmx.ch) and Albrecht Neftel (neftel\_a@bluewin.ch)

- amt-9-2721-2016-supplement-title-page.pdf
- Supplement\_30052016\_DOAS-Sintermann.pdf
- miniDOAS\_Revaluation\_basic\_20150513
  - .DS\_Store
  - .Rhistory
  - .Rproj.user
    - \* .DS\_Store
    - \* C4890FAA
  - 0\_Measurement\_Data
    - \* .DS\_Store
    - \* 20150519.csv
  - 1\_Reference\_Spectra
    - \* .DS\_Store
    - \* miniDOAS-ref\_cal\_spec-Eval201602170000
  - 2\_Results
    - \* .DS\_Store
    - \* miniDOAS\_20150519-20150519\_Eval201605131125
  - README.txt
  - miniDOAS\_Revaluation
    - \* .DS\_Store
    - \* .Rhistory
    - \* 1\_miniDOAS\_average\_refspects.R
    - \* 2\_miniDOAS\_do\_data\_eval\_here.R
    - \* miniDOAS\_cleanupalittle.R
    - \* miniDOAS\_evaluation\_param.R
    - \* miniDOAS\_functions.R

- \* miniDOAS\_maincode.R
- \* miniDOAS\_packages.R
- \* miniDOAS\_rawdata\_structure.R
- \* miniDOAS\_setupeval.R
- \* miniDOAS\_spectrometer\_param.R

The copyright of individual parts of the supplement might differ from the CC-BY 3.0 licence.
