# Supplementary material for: A miniDOAS instrument optimised for ammonia field measurements
Source: Copernicus journal article supplement (doi:10.5194/amt-9-2721-2016), 2016-06-29
Supplement: Supplementary file 2 [file amt-9-2721-2016-supplement.zip]

Archive with 122 entries (103 files):
- miniDOAS_Revaluation_basic_20150513/
- miniDOAS_Revaluation_basic_20150513/2_Results/
- miniDOAS_Revaluation_basic_20150513/2_Results/miniDOAS_20150519-20150519_Eval201605131125/
- miniDOAS_Revaluation_basic_20150513/2_Results/miniDOAS_20150519-20150519_Eval201605131125/miniDOAS_20150519-20150519_Eval201605131125_log.txt
- miniDOAS_Revaluation_basic_20150513/2_Results/miniDOAS_20150519-20150519_Eval201605131125/images/
- miniDOAS_Revaluation_basic_20150513/2_Results/miniDOAS_20150519-20150519_Eval201605131125/images/Rplot_miniDOAS_20150519-20150519_Eval201605131125_avg1_13.png
- miniDOAS_Revaluation_basic_20150513/2_Results/miniDOAS_20150519-20150519_Eval201605131125/images/Rplot_miniDOAS_20150519-20150519_Eval201605131125_avg1_6.png
- miniDOAS_Revaluation_basic_20150513/2_Results/miniDOAS_20150519-20150519_Eval201605131125/images/Rplot_miniDOAS_20150519-20150519_Eval201605131125_avg1_45.png
- miniDOAS_Revaluation_basic_20150513/2_Results/miniDOAS_20150519-20150519_Eval201605131125/images/Rplot_miniDOAS_20150519-20150519_Eval201605131125_avg1_16.png
- miniDOAS_Revaluation_basic_20150513/2_Results/miniDOAS_20150519-20150519_Eval201605131125/images/Rplot_miniDOAS_20150519-20150519_Eval201605131125_avg1_44.png
- miniDOAS_Revaluation_basic_20150513/2_Results/miniDOAS_20150519-20150519_Eval201605131125/images/Rplot_miniDOAS_20150519-20150519_Eval201605131125_avg1_26.png
- miniDOAS_Revaluation_basic_20150513/2_Results/miniDOAS_20150519-20150519_Eval201605131125/images/Rplot_miniDOAS_20150519-20150519_Eval201605131125_avg1_3.png
- miniDOAS_Revaluation_basic_20150513/2_Results/miniDOAS_20150519-20150519_Eval201605131125/images/Rplot_miniDOAS_20150519-20150519_Eval201605131125_avg1_31.png
- miniDOAS_Revaluation_basic_20150513/2_Results/miniDOAS_20150519-20150519_Eval201605131125/images/Rplot_miniDOAS_20150519-20150519_Eval201605131125_avg1_2.png
- miniDOAS_Revaluation_basic_20150513/2_Results/miniDOAS_20150519-20150519_Eval201605131125/images/Rplot_miniDOAS_20150519-20150519_Eval201605131125_avg1_12.png
- miniDOAS_Revaluation_basic_20150513/2_Results/miniDOAS_20150519-20150519_Eval201605131125/images/Rplot_miniDOAS_20150519-20150519_Eval201605131125_avg1_22.png
- miniDOAS_Revaluation_basic_20150513/2_Results/miniDOAS_20150519-20150519_Eval201605131125/images/Rplot_miniDOAS_20150519-20150519_Eval201605131125_avg1_34.png
- miniDOAS_Revaluation_basic_20150513/2_Results/miniDOAS_20150519-20150519_Eval201605131125/images/Rplot_miniDOAS_20150519-20150519_Eval201605131125_avg1_49.png
- miniDOAS_Revaluation_basic_20150513/2_Results/miniDOAS_20150519-20150519_Eval201605131125/images/Rplot_miniDOAS_20150519-20150519_Eval201605131125_avg1_35.png
- miniDOAS_Revaluation_basic_20150513/2_Results/miniDOAS_20150519-20150519_Eval201605131125/images/Rplot_miniDOAS_20150519-20150519_Eval201605131125_avg1_9.png
- miniDOAS_Revaluation_basic_20150513/2_Results/miniDOAS_20150519-20150519_Eval201605131125/images/Rplot_miniDOAS_20150519-20150519_Eval201605131125_avg1_40.png
- miniDOAS_Revaluation_basic_20150513/2_Results/miniDOAS_20150519-20150519_Eval201605131125/images/Rplot_miniDOAS_20150519-20150519_Eval201605131125_avg1_30.png
- miniDOAS_Revaluation_basic_20150513/2_Results/miniDOAS_20150519-20150519_Eval201605131125/images/Rplot_miniDOAS_20150519-20150519_Eval201605131125_avg1_33.png
- miniDOAS_Revaluation_basic_20150513/2_Results/miniDOAS_20150519-20150519_Eval201605131125/images/Rplot_miniDOAS_20150519-20150519_Eval201605131125_avg1_4.png
- miniDOAS_Revaluation_basic_20150513/2_Results/miniDOAS_20150519-20150519_Eval201605131125/images/Rplot_miniDOAS_20150519-20150519_Eval201605131125_avg1_23.png
- miniDOAS_Revaluation_basic_20150513/2_Results/miniDOAS_20150519-20150519_Eval201605131125/images/Rplot_miniDOAS_20150519-20150519_Eval201605131125_avg1_36.png
- miniDOAS_Revaluation_basic_20150513/2_Results/miniDOAS_20150519-20150519_Eval201605131125/images/Rplot_miniDOAS_20150519-20150519_Eval201605131125_avg1_48.png
- miniDOAS_Revaluation_basic_20150513/2_Results/miniDOAS_20150519-20150519_Eval201605131125/images/Rplot_miniDOAS_20150519-20150519_Eval201605131125_avg1_19.png
- miniDOAS_Revaluation_basic_20150513/2_Results/miniDOAS_20150519-20150519_Eval201605131125/images/Rplot_miniDOAS_20150519-20150519_Eval201605131125_avg1_28.png
- miniDOAS_Revaluation_basic_20150513/2_Results/miniDOAS_20150519-20150519_Eval201605131125/images/Rplot_miniDOAS_20150519-20150519_Eval201605131125_avg1_29.png
- miniDOAS_Revaluation_basic_20150513/2_Results/miniDOAS_20150519-20150519_Eval201605131125/images/Rplot_miniDOAS_20150519-20150519_Eval201605131125_avg1_24.png
- miniDOAS_Revaluation_basic_20150513/2_Results/miniDOAS_20150519-20150519_Eval201605131125/images/Rplot_miniDOAS_20150519-20150519_Eval201605131125_avg1_7.png
- miniDOAS_Revaluation_basic_20150513/2_Results/miniDOAS_20150519-20150519_Eval201605131125/images/Rplot_miniDOAS_20150519-20150519_Eval201605131125_avg1_41.png
- miniDOAS_Revaluation_basic_20150513/2_Results/miniDOAS_20150519-20150519_Eval201605131125/images/Rplot_miniDOAS_20150519-20150519_Eval201605131125_avg1_10.png
- miniDOAS_Revaluation_basic_20150513/2_Results/miniDOAS_20150519-20150519_Eval201605131125/images/Rplot_miniDOAS_20150519-20150519_Eval201605131125_avg1_14.png
- miniDOAS_Revaluation_basic_20150513/2_Results/miniDOAS_20150519-20150519_Eval201605131125/images/Rplot_miniDOAS_20150519-20150519_Eval201605131125_avg1_17.png
- miniDOAS_Revaluation_basic_20150513/2_Results/miniDOAS_20150519-20150519_Eval201605131125/images/Rplot_miniDOAS_20150519-20150519_Eval201605131125_avg1_5.png
- miniDOAS_Revaluation_basic_20150513/2_Results/miniDOAS_20150519-20150519_Eval201605131125/images/Rplot_miniDOAS_20150519-20150519_Eval201605131125_avg1_37.png
- miniDOAS_Revaluation_basic_20150513/2_Results/miniDOAS_20150519-20150519_Eval201605131125/images/Rplot_miniDOAS_20150519-20150519_Eval201605131125_avg1_8.png
- miniDOAS_Revaluation_basic_20150513/2_Results/miniDOAS_20150519-20150519_Eval201605131125/images/Rplot_miniDOAS_20150519-20150519_Eval201605131125_avg1_20.png
- miniDOAS_Revaluation_basic_20150513/2_Results/miniDOAS_20150519-20150519_Eval201605131125/images/Rplot_miniDOAS_20150519-20150519_Eval201605131125_avg1_46.png
- miniDOAS_Revaluation_basic_20150513/2_Results/miniDOAS_20150519-20150519_Eval201605131125/images/Rplot_miniDOAS_20150519-20150519_Eval201605131125_avg1_15.png
- miniDOAS_Revaluation_basic_20150513/2_Results/miniDOAS_20150519-20150519_Eval201605131125/images/Rplot_miniDOAS_20150519-20150519_Eval201605131125_avg1_1.png
- miniDOAS_Revaluation_basic_20150513/2_Results/miniDOAS_20150519-20150519_Eval201605131125/images/Rplot_miniDOAS_20150519-20150519_Eval201605131125_avg1_18.png
- miniDOAS_Revaluation_basic_20150513/2_Results/miniDOAS_20150519-20150519_Eval201605131125/images/Rplot_miniDOAS_20150519-20150519_Eval201605131125_avg1_11.png
- miniDOAS_Revaluation_basic_20150513/2_Results/miniDOAS_20150519-20150519_Eval201605131125/images/Rplot_miniDOAS_20150519-20150519_Eval201605131125_avg1_39.png
- miniDOAS_Revaluation_basic_20150513/2_Results/miniDOAS_20150519-20150519_Eval201605131125/images/Rplot_miniDOAS_20150519-20150519_Eval201605131125_avg1_32.png
- miniDOAS_Revaluation_basic_20150513/2_Results/miniDOAS_20150519-20150519_Eval201605131125/images/Rplot_miniDOAS_20150519-20150519_Eval201605131125_avg1_42.png
- miniDOAS_Revaluation_basic_20150513/2_Results/miniDOAS_20150519-20150519_Eval201605131125/images/Rplot_miniDOAS_20150519-20150519_Eval201605131125_avg1_25.png
- miniDOAS_Revaluation_basic_20150513/2_Results/miniDOAS_20150519-20150519_Eval201605131125/images/Rplot_miniDOAS_20150519-20150519_Eval201605131125_avg1_38.png
- miniDOAS_Revaluation_basic_20150513/2_Results/miniDOAS_20150519-20150519_Eval201605131125/images/Rplot_miniDOAS_20150519-20150519_Eval201605131125_avg1_47.png
- miniDOAS_Revaluation_basic_20150513/2_Results/miniDOAS_20150519-20150519_Eval201605131125/images/Rplot_miniDOAS_20150519-20150519_Eval201605131125_avg1_21.png
- miniDOAS_Revaluation_basic_20150513/2_Results/miniDOAS_20150519-20150519_Eval201605131125/images/Rplot_miniDOAS_20150519-20150519_Eval201605131125_avg1_27.png
- miniDOAS_Revaluation_basic_20150513/2_Results/miniDOAS_20150519-20150519_Eval201605131125/images/Rplot_miniDOAS_20150519-20150519_Eval201605131125_avg1_43.png
- miniDOAS_Revaluation_basic_20150513/2_Results/miniDOAS_20150519-20150519_Eval201605131125/miniDOAS_20150519-20150519_Eval201605131125.csv
- miniDOAS_Revaluation_basic_20150513/2_Results/miniDOAS_20150519-20150519_Eval201605131125/js/
- miniDOAS_Revaluation_basic_20150513/2_Results/miniDOAS_20150519-20150519_Eval201605131125/js/jquery-1.4.4.min.js
- miniDOAS_Revaluation_basic_20150513/2_Results/miniDOAS_20150519-20150519_Eval201605131125/js/jquery.scianimator.min.js
- miniDOAS_Revaluation_basic_20150513/2_Results/miniDOAS_20150519-20150519_Eval201605131125/js/Rplot_miniDOAS_20150519-20150519_Eval201605131125_avg1_.js
- miniDOAS_Revaluation_basic_20150513/2_Results/miniDOAS_20150519-20150519_Eval201605131125/.Rhistory
- miniDOAS_Revaluation_basic_20150513/2_Results/miniDOAS_20150519-20150519_Eval201605131125/css/
- miniDOAS_Revaluation_basic_20150513/2_Results/miniDOAS_20150519-20150519_Eval201605131125/css/styles.css
- miniDOAS_Revaluation_basic_20150513/2_Results/miniDOAS_20150519-20150519_Eval201605131125/css/reset.css
- miniDOAS_Revaluation_basic_20150513/2_Results/miniDOAS_20150519-20150519_Eval201605131125/css/scianimator.blue.css
- miniDOAS_Revaluation_basic_20150513/2_Results/miniDOAS_20150519-20150519_Eval201605131125/css/scianimator.light.css
- miniDOAS_Revaluation_basic_20150513/2_Results/miniDOAS_20150519-20150519_Eval201605131125/css/scianimator.css
- miniDOAS_Revaluation_basic_20150513/2_Results/miniDOAS_20150519-20150519_Eval201605131125/css/scianimator.dark.css
- miniDOAS_Revaluation_basic_20150513/2_Results/miniDOAS_20150519-20150519_Eval201605131125/.DS_Store
- miniDOAS_Revaluation_basic_20150513/2_Results/miniDOAS_20150519-20150519_Eval201605131125/miniDOAS-calrefs-20150519-20150519-Eval201605131125.pdf
- miniDOAS_Revaluation_basic_20150513/2_Results/miniDOAS_20150519-20150519_Eval201605131125/miniDOAS_20150519-20150519_Eval201605131125_avg1.html
- miniDOAS_Revaluation_basic_20150513/2_Results/.DS_Store
- miniDOAS_Revaluation_basic_20150513/.Rhistory
- miniDOAS_Revaluation_basic_20150513/miniDOAS_Revaluation/
- miniDOAS_Revaluation_basic_20150513/miniDOAS_Revaluation/miniDOAS_functions.R
- miniDOAS_Revaluation_basic_20150513/miniDOAS_Revaluation/miniDOAS_evaluation_param.R
- miniDOAS_Revaluation_basic_20150513/miniDOAS_Revaluation/1_miniDOAS_average_refspecs.R
- miniDOAS_Revaluation_basic_20150513/miniDOAS_Revaluation/2_miniDOAS_do_data_eval_here.R
- miniDOAS_Revaluation_basic_20150513/miniDOAS_Revaluation/.Rhistory
- miniDOAS_Revaluation_basic_20150513/miniDOAS_Revaluation/miniDOAS_cleanupalittle.R
- miniDOAS_Revaluation_basic_20150513/miniDOAS_Revaluation/.DS_Store
- miniDOAS_Revaluation_basic_20150513/miniDOAS_Revaluation/miniDOAS_packages.R
- miniDOAS_Revaluation_basic_20150513/miniDOAS_Revaluation/miniDOAS_setupeval.R
- miniDOAS_Revaluation_basic_20150513/miniDOAS_Revaluation/miniDOAS_spectrometer_param.R
- miniDOAS_Revaluation_basic_20150513/miniDOAS_Revaluation/miniDOAS_rawdata_structure.R
- miniDOAS_Revaluation_basic_20150513/miniDOAS_Revaluation/miniDOAS_maincode.R
- miniDOAS_Revaluation_basic_20150513/.DS_Store
- miniDOAS_Revaluation_basic_20150513/1_Reference_Spectra/
- miniDOAS_Revaluation_basic_20150513/1_Reference_Spectra/miniDOAS-ref_cal_spec-Eval201602170000/
- miniDOAS_Revaluation_basic_20150513/1_Reference_Spectra/miniDOAS-ref_cal_spec-Eval201602170000/miniDOAS_N2calSpec_201410281537-201410281541-Eval201602170000.txt
- miniDOAS_Revaluation_basic_20150513/1_Reference_Spectra/miniDOAS-ref_cal_spec-Eval201602170000/miniDOAS_darkSpec_201505071123-201505071127-Eval201602170000.txt
- miniDOAS_Revaluation_basic_20150513/1_Reference_Spectra/miniDOAS-ref_cal_spec-Eval201602170000/miniDOAS_refLampSpec_201505181200-201505181659-Eval201602170000.txt
- miniDOAS_Revaluation_basic_20150513/1_Reference_Spectra/miniDOAS-ref_cal_spec-Eval201602170000/miniDOAS_refdarkLampSpec_201505181200-201505181659-Eval201602170000.txt
- miniDOAS_Revaluation_basic_20150513/1_Reference_Spectra/miniDOAS-ref_cal_spec-Eval201602170000/miniDOAS_SO2calSpec_201410281515-201410281518-Eval201602170000.txt
- miniDOAS_Revaluation_basic_20150513/1_Reference_Spectra/miniDOAS-ref_cal_spec-Eval201602170000/miniDOAS_NOcalSpec_201410281521-201410281525-Eval201602170000.txt
- miniDOAS_Revaluation_basic_20150513/1_Reference_Spectra/miniDOAS-ref_cal_spec-Eval201602170000/.DS_Store
- miniDOAS_Revaluation_basic_20150513/1_Reference_Spectra/miniDOAS-ref_cal_spec-Eval201602170000/miniDOAS_darkN2calSpec_201410281503-201410281506-Eval201602170000.txt
- miniDOAS_Revaluation_basic_20150513/1_Reference_Spectra/miniDOAS-ref_cal_spec-Eval201602170000/miniDOAS_NH3calSpec_201410281529-201410281533-Eval201602170000.txt
- miniDOAS_Revaluation_basic_20150513/1_Reference_Spectra/miniDOAS-ref_cal_spec-Eval201602170000/Spectrometer-wavelengths-Eval201602170000.txt
- miniDOAS_Revaluation_basic_20150513/1_Reference_Spectra/.DS_Store
- miniDOAS_Revaluation_basic_20150513/0_Measurement_Data/
- miniDOAS_Revaluation_basic_20150513/0_Measurement_Data/.DS_Store
- miniDOAS_Revaluation_basic_20150513/0_Measurement_Data/20150519.csv
- miniDOAS_Revaluation_basic_20150513/.Rproj.user/
- miniDOAS_Revaluation_basic_20150513/.Rproj.user/C4890FAA/
- miniDOAS_Revaluation_basic_20150513/.Rproj.user/C4890FAA/pcs/
- miniDOAS_Revaluation_basic_20150513/.Rproj.user/C4890FAA/pcs/files-pane.pper
- miniDOAS_Revaluation_basic_20150513/.Rproj.user/C4890FAA/pcs/source-pane.pper
- miniDOAS_Revaluation_basic_20150513/.Rproj.user/C4890FAA/pcs/workbench-pane.pper
- miniDOAS_Revaluation_basic_20150513/.Rproj.user/C4890FAA/pcs/windowlayoutstate.pper
- miniDOAS_Revaluation_basic_20150513/.Rproj.user/C4890FAA/sdb/
- miniDOAS_Revaluation_basic_20150513/.Rproj.user/C4890FAA/sdb/.DS_Store
- miniDOAS_Revaluation_basic_20150513/.Rproj.user/C4890FAA/sdb/per/
- miniDOAS_Revaluation_basic_20150513/.Rproj.user/C4890FAA/sdb/per/t/
- miniDOAS_Revaluation_basic_20150513/.Rproj.user/C4890FAA/sdb/per/.DS_Store
- miniDOAS_Revaluation_basic_20150513/.Rproj.user/C4890FAA/sdb/per/u/
- miniDOAS_Revaluation_basic_20150513/.Rproj.user/C4890FAA/.DS_Store
- miniDOAS_Revaluation_basic_20150513/.Rproj.user/C4890FAA/ctx/
- miniDOAS_Revaluation_basic_20150513/.Rproj.user/C4890FAA/presentation/
- miniDOAS_Revaluation_basic_20150513/.Rproj.user/.DS_Store
- miniDOAS_Revaluation_basic_20150513/README.txt
- Supplement_30052016_DOAS-Sintermann.pdf
- amt-9-2721-2016-supplement-title-page.pdf
