# Supplementary material for: A miniDOAS instrument optimised for ammonia field measurements
Source: Copernicus journal article supplement (doi:10.5194/amt-9-2721-2016), 2016-06-29
Supplement: Supplementary file 2 [file amt-9-2721-2016-supplement.zip › miniDOAS_Revaluation_basic_20150513/0_Measurement_Data/20150519.csv]

DOAS model:;S5;S5;S5;S5;S5;S5;S5;S5;S5;S5;S5;S5;S5;S5;S5;S5;S5;S5;S5;S5;S5;S5;S5;S5;S5;S5;S5;S5;S5;S5;S5;S5;S5;S5;S5;S5;S5;S5;S5;S5;S5;S5;S5;S5;S5;S5;S5;S5;S5;S5;S5;S5;S5;S5;S5;S5;S5;S5;S5;S5;S5;S5;S5;S5;S5;S5;S5;S5;S5;S5;S5;S5;S5;S5;S5;S5;S5;S5;S5;S5;S5;S5;S5;S5;S5;S5;S5;S5;S5;S5;S5;S5;S5;S5;S5;S5;S5;S5;S5;S5;S5;S5;S5;S5;S5;S5;S5;S5;S5;S5;S5;S5;S5;S5;S5;S5;S5;S5;S5;S5;S5;S5;S5;S5;S5;S5;S5;S5;S5;…
Spectrometer:;QE65000 serial-QEPB0591	grating-2400;QE65000 serial-QEPB0591	grating-2400;QE65000 serial-QEPB0591	grating-2400;QE65000 serial-QEPB0591	grating-2400;QE65000 serial-QEPB0591	grating-2400;QE65000 serial-QEPB0591	grating-2400;QE65000 serial-QEPB0591	grating-2400;QE65000 serial-QEPB0591	grating-2400;QE65000 serial-QEPB0591	grating-2400;QE65000 serial-QEPB0591	grating-2400;QE65000 serial-QEPB0591	grating-2400;QE65000 serial-QEPB0591	grating-2400;QE65000 serial-QEPB0591	grating-2400;QE65000 serial-QEPB0591	grating-2400;QE65000 serial-QEPB0591	grating-2400;QE65000 serial-QEPB0591	grating-2400;QE65000 serial-QEPB0591	grating-2400;QE65000 serial-QEPB0591	grating-2400;QE65000 serial-QEPB0591	grating-2400;QE65000 serial-QEPB0591	grating-2400;QE65000 serial-QEPB0591	grating-2400;QE65000 serial-QEPB0591	grating-2400;QE65000 serial-QEPB0591	grating-2400;QE65000 serial-QEPB0591	grating-2400;QE65000 serial-QEPB0591	grating-2400;QE65000 serial-QEPB0591	grating-2400;QE65000 serial-QEPB0591	grating-2400;QE65000 serial-QEPB0591	grating-2400;QE65000 serial-QEPB0591	grating-2400;QE65000 serial-QEPB0591	grating-2400;QE65000 serial-QEPB0591	grating-2400;QE65000 serial-QEPB0591	grating-2400;QE65000 serial-QEPB0591	grating-2400;QE65000 serial-QEPB0591	grating-2400;QE65000 serial-QEPB0591	grating-2400;QE65000 serial-QEPB0591	grating-2400;QE65000 serial-QEPB0591	grating-2400;QE65000 serial-QEPB0591	grating-2400;QE65000 serial-QEPB0591	grating-2400;QE65000 serial-QEPB0591	grating-2400;QE65000 serial-QEPB0591	grating-2400;QE65000 serial-QEPB0591	grating-2400;QE65000 serial-QEPB0591	grating-2400;QE65000 serial-QEPB0591	grating-2400;QE65000 serial-QEPB0591	grating-2400;QE65000 serial-QEPB0591	grating-2400;QE65000 serial-QEPB0591	grating-2400;QE65000 serial-QEPB0591	grating-2400;QE65000 serial-QEPB0591	grating-2400;QE65000 serial-QEPB0591
Revolver position:;Leer;Leer;Leer;Leer;Leer;Leer;Leer;Leer;Leer;Leer;Leer;Leer;Leer;Leer;Leer;Leer;Leer;Leer;Leer;Leer;Leer;Leer;Leer;Leer;Leer;Leer;Leer;Leer;Leer;Leer;Leer;Leer;Leer;Leer;Leer;Leer;Leer;Leer;Leer;Leer;Leer;Leer;Leer;Leer;Leer;Leer;Leer;Leer;Leer;Leer;Leer;Leer;Leer;Leer;Leer;Leer;Leer;Leer;Leer;Leer;Leer;Leer;Leer;Leer;Leer;Leer;Leer;Leer;Leer;Leer;Leer;Leer;Leer;Leer;Leer;Leer;…
Shutter position:;open;open;open;open;open;open;open;open;open;open;open;open;open;open;open;open;open;open;open;open;open;open;open;open;open;open;open;open;open;open;open;open;open;open;open;open;open;open;open;open;open;open;open;open;open;open;open;open;open;open;open;open;open;open;open;open;open;open;open;open;open;open;open;open;open;open;open;open;open;open;open;open;open;open;open;open;o…
Acquisition start time:; UTC+00:00:00_150519000022.136; UTC+00:00:00_150519000122.102; UTC+00:00:00_150519000222.121; UTC+00:00:00_150519000322.141; UTC+00:00:00_150519000422.160; UTC+00:00:00_150519000522.175; UTC+00:00:00_150519000622.192; UTC+00:00:00_150519000722.159; UTC+00:00:00_150519000822.178; UTC+00:00:00_150519000922.193; UTC+00:00:00_150519001022.212; UTC+00:00:00_150519001122.234; UT…
Acquisition stop time:; UTC+00:00:00_150519000122.102; UTC+00:00:00_150519000222.120; UTC+00:00:00_150519000322.140; UTC+00:00:00_150519000422.160; UTC+00:00:00_150519000522.175; UTC+00:00:00_150519000622.191; UTC+00:00:00_150519000722.156; UTC+00:00:00_150519000822.176; UTC+00:00:00_150519000922.193; UTC+00:00:00_150519001022.212; UTC+00:00:00_150519001122.231; UTC+00:00:00_150519001222.198; UTC…
TEC temperature (deg C):;-10;-9.9;-9.9;-10;-10;-10;-9.9;-9.9;-10;-10;-9.9;-10;-9.9;-10;-10;-10;-9.9;-10;-9.9;-10;-10;-10;-9.9;-10;-10;-9.9;-10;-10;-10;-10;-10;-10;-10;-9.9;-9.9;-10;-10;-9.9;-9.9;-10;-9.9;-10;-10;-9.9;-10;-10;-10;-10;-10;-9.9;-10;-10;-10;-10;-10;-10;-10;-10;-9.9;-9.9;-9.9;-0.1;-9.9;-10;-10;-10;-10;-10;-10;-9.9;-10;-9.9;-10;-10;-10;-10;-9.9;-10;-9.9;-0.1;-10;-10;-10;-10;-9.9;-10;-1…
DOAS board temperature (deg C	deg C	%):;32.1	8.5	70.4	;32.1	8.5	70.4	;32.2	8.5	70.4	;32.2	8.5	70.4	;32.2	8.5	70.5	;32.3	8.5	70.4	;32.3	8.5	70.5	;32.3	8.5	70.4	;32.3	8.6	70.3	;32.4	8.6	70.3	;32.4	8.5	70.3	;32.4	8.5	70.3	;32.4	8.5	70.4	;32.4	8.5	70.4	;32.4	8.5	70.5	;32.4	8.5	70.5
Spectrometer exposure time (ms):;100;100;100;100;100;100;100;100;100;100;100;100;100;100;100;100;100;100;100;100;100;100;100;100;100;100;100;100;100;100;100;100;100;100;100;100;100;100;100;100;100;100;100;100;100;100;100;100;100;100;100;100;100;100;100;100;100;100;100;100;100;100;100;100;100;100;100;100;100;100;100;100;100;100;100;100;100;100;100;100;100;100;100;100;100;100;100;100;100;100;100;10…
Number of accumulations:;598;598;598;598;598;598;598;598;598;598;598;598;598;598;598;598;598;598;598;598;598;598;598;598;598;598;598;598;598;598;598;598;598;598;598;598;598;598;598;598;598;598;598;598;598;598;598;598;598;598;598;598;598;598;598;598;598;598;598;598;598;598;598;598;598;598;598;598;598;598;598;598;598;598;598;598;598;598;598;598;598;598;598;598;598;598;598;598;598;598;598;598;598;59…
Acquisition duration (sec):;59.966;60.018;60.019;60.019;60.015;60.016;59.964;60.017;60.015;60.019;60.019;59.964;60.018;60.017;59.967;59.966;60.018;60.018;59.966;59.966;59.965;59.966;60.015;59.966;60.017;60.015;60.019;60.016;59.968;60.018;60.016;60.016;59.967;60.017;60.018;60.018;60.017;60.02;60.017;59.964;60.017;60.018;60.016;60.016;60.016;59.966;59.966;59.967;60.021;60.019;60.018;60.016;60.017;6…
---;---;---;---;---;---;---;---;---;---;---;---;---;---;---;---;---;---;---;---;---;---;---;---;---;---;---;---;---;---;---;---;---;---;---;---;---;---;---;---;---;---;---;---;---;---;---;---;---;---;---;---;---;---;---;---;---;---;---;---;---;---;---;---;---;---;---;---;---;---;---;---;---;---;---;---;---;---;---;---;---;---;---;---;---;---;---;---;---;---;---;---;---;---;---;---;---;---;---;---…
Spectrometer wavelengths (nm);I_sum;I_sum;I_sum;I_sum;I_sum;I_sum;I_sum;I_sum;I_sum;I_sum;I_sum;I_sum;I_sum;I_sum;I_sum;I_sum;I_sum;I_sum;I_sum;I_sum;I_sum;I_sum;I_sum;I_sum;I_sum;I_sum;I_sum;I_sum;I_sum;I_sum;I_sum;I_sum;I_sum;I_sum;I_sum;I_sum;I_sum;I_sum;I_sum;I_sum;I_sum;I_sum;I_sum;I_sum;I_sum;I_sum;I_sum;I_sum;I_sum;I_sum;I_sum;I_sum;I_sum;I_sum;I_sum;I_sum;I_sum;I_sum;I_sum;I_sum;I_sum;I_s…
137.154809762546;1434716;1434720;1434801;1434766;1434781;1434777;1434778;1434768;1434806;1434762;1434799;1434799;1434787;1434786;1434826;1434771;1434858;1434760;1434790;1434764;1434716;1434745;1434691;1434735;1434730;1434671;1434723;1434655;1434637;1434678;1434627;1434643;1434595;1434593;1434561;1434541;1434579;1434527;1434540;1434537;1434520;1434505;1434392;1434431;1434375;1434382;1434422;143434…
137.25815349717;1433013;1433033;1433135;1433054;1433056;1433053;1433137;1433139;1433142;1433120;1433091;1433161;1433080;1433120;1433104;1433122;1433131;1433077;1433118;1433109;1433068;1433094;1433058;1433012;1433003;1433057;1433029;1433050;1433088;1433009;1432984;1432982;1432938;1432953;1432892;1432867;1432888;1432882;1432848;1432798;1432738;1432770;1432694;1432726;1432690;1432687;1432633;1432632…
137.361464332349;1432794;1432820;1432882;1432851;1432844;1432837;1432877;1432938;1432877;1432839;1432893;1432903;1432917;1432871;1432909;1432919;1432927;1432914;1432902;1432857;1432878;1432875;1432837;1432841;1432847;1432779;1432793;1432806;1432801;1432795;1432740;1432696;1432749;1432675;1432686;1432687;1432667;1432691;1432660;1432563;1432565;1432560;1432519;1432552;1432485;1432525;1432423;143237…
137.464742296559;1432811;1432765;1432887;1432810;1432822;1432827;1432838;1432855;1432844;1432953;1432898;1432895;1432884;1432909;1432881;1432892;1432935;1432902;1432840;1432901;1432900;1432871;1432839;1432829;1432831;1432845;1432786;1432785;1432761;1432784;1432724;1432725;1432671;1432664;1432688;1432691;1432656;1432608;1432599;1432562;1432582;1432510;1432474;1432479;1432491;1432468;1432411;143240…
137.56798741828;1513143;1512913;1512845;1512612;1512771;1512714;1512384;1512533;1512539;1512604;1512538;1512232;1512212;1512058;1512190;1512138;1512115;1512029;1512118;1512087;1512268;1512486;1512662;1512936;1513153;1513352;1513387;1513714;1513752;1513813;1514034;1514187;1514300;1514243;1514329;1514376;1514587;1514782;1514795;1514834;1515066;1515154;1515167;1515350;1515324;1515465;1515743;1515670…
137.671199725988;1512801;1512734;1512508;1512376;1512583;1512372;1512278;1512376;1512299;1512345;1512422;1512122;1512059;1511885;1511993;1511944;1511880;1511809;1512000;1511855;1512041;1512158;1512523;1512626;1512903;1513123;1513226;1513461;1513718;1513718;1513760;1513818;1514081;1514028;1513936;1514275;1514400;1514504;1514650;1514623;1514703;1514957;1514896;1515089;1515281;1515236;1515529;151550…
137.77437924816;1512538;1512700;1512442;1512224;1512478;1512215;1512061;1512202;1512252;1512312;1512310;1512086;1511962;1511735;1511874;1511890;1511746;1511685;1511831;1511775;1511851;1512053;1512314;1512650;1512749;1513106;1513060;1513381;1513574;1513534;1513759;1513899;1513801;1513795;1513979;1514177;1514366;1514443;1514612;1514618;1514763;1514814;1514887;1515045;1515298;1515141;1515391;1515361…
137.877526013275;1512550;1512709;1512443;1512263;1512306;1512203;1512017;1512179;1512225;1512286;1512208;1512028;1512017;1511756;1511836;1511911;1511742;1511752;1511755;1511748;1511870;1512244;1512466;1512398;1512706;1513173;1513005;1513441;1513462;1513494;1513584;1513825;1513999;1513803;1513881;1514075;1514348;1514341;1514328;1514478;1514764;1514901;1514878;1514988;1515182;1515180;1515231;151539…
137.980640049809;1512596;1512457;1512348;1512238;1512352;1512276;1512005;1512194;1512206;1512108;1512244;1511881;1511835;1511825;1511709;1511754;1511670;1511724;1511741;1511715;1511876;1512132;1512356;1512625;1512794;1513047;1513160;1513442;1513581;1513449;1513599;1513867;1513816;1513781;1514015;1514174;1514114;1514442;1514420;1514475;1514598;1514806;1514844;1514835;1515028;1515162;1515226;151528…
138.08372138624;1512262;1512325;1512200;1512074;1512287;1512029;1511887;1511862;1512050;1512128;1512007;1511752;1511678;1511541;1511574;1511640;1511550;1511427;1511473;1511528;1511560;1511762;1512141;1512315;1512521;1512750;1512811;1513057;1513407;1513205;1513507;1513593;1513651;1513688;1513655;1513834;1513960;1514257;1514328;1514352;1514460;1514530;1514735;1514756;1514995;1514896;1515031;1515119…
138.186770051045;1512207;1512188;1511977;1511769;1511953;1511794;1511684;1511628;1511717;1511799;1511761;1511524;1511424;1511359;1511366;1511296;1511207;1511217;1511446;1511353;1511385;1511656;1511934;1512005;1512321;1512727;1512632;1513005;1513062;1513073;1513262;1513362;1513422;1513423;1513525;1513491;1513708;1513994;1513883;1514034;1514159;1514326;1514400;1514696;1514698;1514706;1514800;151482…
138.289786072703;1511838;1511749;1511656;1511386;1511656;1511527;1511274;1511435;1511461;1511534;1511546;1511175;1511258;1511077;1510847;1511161;1510902;1510881;1511007;1511034;1510883;1511412;1511398;1511786;1511964;1512217;1512282;1512648;1512654;1512678;1512854;1513069;1512976;1513051;1513142;1513340;1513451;1513724;1513750;1513799;1513936;1514079;1514004;1514294;1514337;1514315;1514420;151464…
138.392769479689;1511823;1511856;1511867;1511575;1511654;1511566;1511430;1511549;1511508;1511619;1511550;1511386;1511315;1511052;1511053;1511157;1511042;1510988;1511033;1511022;1511052;1511427;1511542;1511860;1512091;1512246;1512499;1512634;1512812;1512817;1512855;1513114;1513362;1513172;1513118;1513326;1513534;1513741;1513766;1513789;1513946;1514161;1514171;1514380;1514565;1514305;1514600;151461…
138.495720300483;1511893;1511839;1511678;1511457;1511690;1511325;1511331;1511440;1511558;1511629;1511530;1511305;1511239;1511127;1511059;1511133;1511031;1510914;1511076;1511038;1511156;1511252;1511595;1511880;1511906;1512289;1512190;1512607;1512670;1512661;1512883;1513068;1513118;1513128;1513217;1513323;1513508;1513696;1513662;1513781;1513990;1513928;1514193;1514209;1514443;1514361;1514523;151461…
138.59863856356;1511769;1511727;1511414;1511239;1511524;1511311;1511179;1511275;1511379;1511431;1511345;1511161;1510992;1510995;1511006;1510885;1510876;1510808;1511013;1510939;1510987;1511271;1511260;1511620;1511824;1512193;1512145;1512462;1512703;1512592;1512781;1512929;1512894;1512991;1512961;1513231;1513308;1513574;1513530;1513665;1513788;1513936;1514073;1514053;1514083;1514342;1514414;1514460…
138.701524297399;1511728;1511505;1511613;1511231;1511380;1511167;1511044;1511134;1511177;1511181;1511130;1510943;1510878;1510772;1510723;1510750;1510689;1510634;1510799;1510761;1510742;1510925;1511281;1511429;1511671;1511987;1512098;1512346;1512422;1512513;1512524;1512746;1512781;1512822;1512886;1513122;1513205;1513295;1513427;1513349;1513702;1513856;1513658;1513932;1514163;1514189;1514233;151432…
138.804377530477;1511519;1511496;1511184;1511141;1511122;1511022;1510959;1511191;1511213;1511094;1511068;1510929;1510768;1510549;1510666;1510770;1510659;1510396;1510597;1510615;1510638;1511066;1511094;1511302;1511548;1511767;1511968;1512191;1512425;1512297;1512378;1512612;1512757;1512649;1512766;1512905;1513224;1513154;1513278;1513412;1513566;1513573;1513708;1513823;1513944;1513918;1514039;151411…
138.907198291272;1511394;1511197;1511186;1511096;1511124;1510930;1510753;1510845;1511015;1511029;1510927;1510705;1510568;1510436;1510517;1510621;1510410;1510207;1510478;1510482;1510511;1510788;1511081;1511174;1511419;1511663;1511664;1512126;1512244;1512140;1512405;1512459;1512451;1512477;1512570;1512686;1513014;1513172;1513002;1513185;1513403;1513424;1513508;1513602;1513809;1513743;1514017;151396…
139.00998660826;1511380;1511364;1511107;1510966;1511219;1510897;1510838;1510990;1511036;1510989;1510776;1510832;1510635;1510516;1510544;1510636;1510466;1510447;1510537;1510442;1510424;1510805;1511153;1511221;1511321;1511770;1511771;1512080;1512287;1512236;1512365;1512469;1512608;1512589;1512743;1512924;1512859;1513150;1513092;1513102;1513420;1513550;1513498;1513746;1513721;1513849;1513978;1514170…
139.11274250992;1511565;1511371;1511132;1510949;1511035;1510919;1510793;1511028;1510895;1511008;1510838;1510740;1510676;1510424;1510530;1510624;1510493;1510494;1510579;1510614;1510540;1510751;1510966;1511248;1511449;1511837;1511744;1512103;1512278;1512238;1512434;1512579;1512688;1512546;1512559;1512746;1513038;1512977;1513184;1513336;1513381;1513564;1513614;1513624;1513844;1513996;1513942;1513903…
139.215466024729;1511141;1511005;1510939;1510706;1511068;1510627;1510667;1510754;1510690;1510709;1510602;1510519;1510356;1510284;1510357;1510325;1510255;1510183;1510350;1510220;1510415;1510662;1510794;1511097;1511166;1511585;1511586;1511907;1511962;1512013;1512101;1512227;1512276;1512414;1512386;1512568;1512805;1512923;1512789;1513094;1513061;1513233;1513312;1513495;1513715;1513603;1513681;151368…
139.318157181164;1511154;1510958;1510925;1510787;1510907;1510614;1510642;1510700;1510671;1510808;1510693;1510520;1510442;1510251;1510283;1510418;1510242;1510312;1510327;1510272;1510273;1510562;1510854;1511033;1511340;1511431;1511550;1511862;1511941;1511984;1512149;1512229;1512409;1512291;1512254;1512629;1512737;1512907;1512838;1512865;1513123;1513303;1513390;1513426;1513650;1513665;1513795;151376…
139.420816007702;1510849;1510797;1510742;1510501;1510680;1510427;1510468;1510561;1510499;1510555;1510487;1510347;1510196;1510080;1510153;1510172;1509970;1510010;1510112;1510008;1510130;1510460;1510750;1510718;1510966;1511408;1511294;1511726;1511813;1511783;1511784;1512060;1512083;1512166;1512107;1512304;1512595;1512703;1512638;1512736;1512918;1512951;1513075;1513237;1513444;1513430;1513447;151345…
139.523442532822;1510769;1510748;1510704;1510461;1510486;1510375;1510240;1510333;1510436;1510498;1510496;1510127;1510022;1509957;1509899;1510117;1509938;1509840;1510156;1510002;1510059;1510290;1510456;1510701;1510773;1511271;1511292;1511555;1511570;1511739;1511747;1511954;1511963;1511982;1512104;1512160;1512431;1512368;1512666;1512566;1512746;1512891;1512922;1513121;1513313;1513271;1513421;151355…
139.626036785;1510842;1510586;1510600;1510514;1510543;1510330;1510389;1510428;1510231;1510378;1510368;1510227;1510055;1510080;1509931;1510075;1509761;1509897;1509927;1509894;1509884;1510324;1510355;1510677;1510795;1511142;1511200;1511434;1511774;1511542;1511669;1511990;1511954;1512029;1511940;1512145;1512328;1512493;1512512;1512588;1512869;1513018;1512921;1513097;1513200;1513298;1513281;1513470;1…
139.728598792714;1510875;1510995;1510674;1510570;1510728;1510492;1510405;1510383;1510703;1510577;1510513;1510176;1510235;1510158;1510181;1510213;1510126;1510023;1510144;1510136;1510115;1510429;1510648;1510809;1511038;1511430;1511403;1511705;1511918;1511812;1511921;1512126;1512088;1512211;1512170;1512434;1512429;1512713;1512773;1512846;1512985;1513164;1513095;1513160;1513473;1513367;1513585;151350…
139.831128584442;1510719;1510614;1510571;1510315;1510389;1510335;1510250;1510415;1510299;1510308;1510304;1509991;1510060;1509862;1509933;1509918;1509898;1509789;1510004;1509831;1509985;1510246;1510408;1510606;1510829;1511079;1511269;1511509;1511651;1511644;1511749;1512013;1511977;1512048;1512047;1512257;1512385;1512499;1512556;1512558;1512866;1512906;1512972;1512946;1513229;1513152;1513452;151332…
139.93362618866;1510599;1510545;1510421;1510190;1510277;1510090;1510147;1510160;1510434;1510363;1510187;1510024;1509988;1509781;1509922;1509888;1509671;1509738;1509759;1509695;1509960;1510118;1510338;1510541;1510656;1511047;1511162;1511360;1511461;1511475;1511593;1511790;1511871;1511869;1511972;1512053;1512269;1512374;1512430;1512502;1512651;1512827;1512857;1513080;1513031;1513165;1513241;1513095…
140.036091633847;1510567;1510450;1510339;1510228;1510384;1510190;1510094;1510216;1510385;1510296;1510200;1510078;1509737;1509696;1509744;1509847;1509777;1509627;1509749;1509757;1509917;1509942;1510221;1510550;1510726;1510930;1510986;1511378;1511550;1511455;1511512;1511818;1511728;1511748;1511832;1511981;1512015;1512495;1512382;1512354;1512676;1512735;1512803;1512918;1513069;1513113;1513146;151324…
140.13852494848;1510448;1510347;1510186;1510050;1510148;1509951;1509928;1509983;1510069;1510091;1509897;1509784;1509684;1509578;1509575;1509640;1509518;1509421;1509564;1509691;1509713;1509842;1510027;1510340;1510369;1510727;1510823;1511120;1511286;1511363;1511367;1511551;1511529;1511527;1511570;1511927;1512006;1512060;1512248;1512204;1512525;1512597;1512573;1512716;1512812;1512846;1512940;1513055…
140.240926161036;1510287;1510072;1510118;1509924;1510133;1509902;1509975;1509917;1509963;1509964;1509950;1509680;1509677;1509445;1509623;1509565;1509375;1509343;1509581;1509472;1509485;1509799;1510018;1510124;1510369;1510755;1510727;1511068;1511150;1511342;1511307;1511445;1511457;1511442;1511500;1511643;1511873;1512107;1512259;1512197;1512362;1512472;1512420;1512621;1512679;1512784;1512776;151305…
140.343295299992;1510119;1510129;1510026;1509819;1510098;1509816;1509757;1509887;1509892;1509895;1509792;1509745;1509494;1509369;1509356;1509456;1509329;1509336;1509469;1509543;1509415;1509610;1509850;1510122;1510429;1510549;1510727;1511003;1511008;1511032;1511226;1511276;1511502;1511421;1511377;1511765;1511660;1511937;1511892;1512092;1512223;1512361;1512455;1512426;1512599;1512730;1512719;151285…
140.445632393827;1510077;1510068;1509942;1509736;1510032;1509731;1509547;1509687;1509692;1509765;1509770;1509582;1509517;1509445;1509297;1509419;1509305;1509126;1509339;1509337;1509359;1509585;1509745;1510035;1510249;1510521;1510621;1510901;1511039;1511063;1511169;1511311;1511332;1511273;1511291;1511631;1511714;1511845;1511944;1511922;1512205;1512269;1512354;1512329;1512570;1512542;1512714;151276…
140.547937471017;1510172;1510036;1509981;1509798;1509828;1509683;1509676;1509785;1509864;1509866;1509813;1509506;1509470;1509320;1509384;1509392;1509408;1509301;1509445;1509268;1509326;1509681;1509774;1510023;1510340;1510522;1510696;1510933;1511040;1511134;1511227;1511355;1511275;1511344;1511503;1511512;1511725;1511921;1511893;1512112;1512159;1512192;1512337;1512403;1512691;1512681;1512715;151279…
140.65021056004;1509996;1509923;1509911;1509731;1509910;1509695;1509553;1509597;1509884;1509825;1509627;1509520;1509394;1509247;1509310;1509440;1509277;1509180;1509237;1509255;1509300;1509552;1509816;1509997;1510204;1510439;1510501;1510778;1510875;1510956;1510979;1511213;1511201;1511274;1511349;1511621;1511608;1511776;1511834;1511995;1512042;1512289;1512190;1512351;1512474;1512574;1512696;1512768…
140.752451689373;1510000;1510051;1509872;1509845;1509929;1509620;1509606;1509723;1509747;1509760;1509701;1509519;1509365;1509227;1509263;1509361;1509272;1509071;1509324;1509206;1509425;1509704;1509789;1510042;1510199;1510520;1510634;1510810;1510970;1511080;1511078;1511200;1511247;1511363;1511368;1511590;1511515;1511772;1511951;1512030;1512189;1512274;1512226;1512384;1512469;1512650;1512562;151280…
140.854660887495;1510043;1509989;1509892;1509730;1509915;1509674;1509614;1509690;1509688;1509828;1509554;1509529;1509339;1509211;1509423;1509356;1509214;1509224;1509202;1509227;1509177;1509492;1509800;1509984;1510160;1510455;1510538;1510791;1511023;1510897;1511069;1511220;1511154;1511205;1511270;1511563;1511586;1511759;1511845;1511943;1512009;1512234;1512262;1512308;1512381;1512504;1512687;151277…
140.956838182881;1510140;1510107;1509896;1509703;1509808;1509758;1509673;1509773;1509710;1509626;1509693;1509413;1509520;1509339;1509332;1509282;1509197;1509093;1509281;1509264;1509367;1509562;1509711;1509907;1510180;1510502;1510526;1510766;1510936;1510986;1511130;1511255;1511270;1511283;1511408;1511479;1511582;1511827;1511927;1511939;1512096;1512274;1512276;1512336;1512517;1512541;1512601;151271…
141.058983604011;1509870;1510012;1509776;1509521;1509710;1509528;1509450;1509554;1509634;1509623;1509434;1509283;1509237;1509017;1509150;1509250;1509152;1509039;1509165;1509118;1509109;1509432;1509627;1509763;1509948;1510320;1510346;1510643;1510832;1510892;1510910;1511029;1510999;1511215;1511283;1511337;1511453;1511564;1511757;1511812;1511882;1511991;1512093;1512295;1512295;1512437;1512428;151245…
141.16109717936;1509976;1509873;1509707;1509502;1509728;1509459;1509321;1509564;1509609;1509527;1509458;1509362;1509160;1509092;1509083;1509231;1509099;1508975;1509157;1509247;1509119;1509481;1509644;1509800;1510017;1510223;1510484;1510628;1510818;1510772;1510777;1511037;1511112;1511154;1511222;1511255;1511580;1511565;1511851;1511778;1511934;1512017;1512096;1512312;1512387;1512443;1512539;1512599…
141.263178937407;1510065;1509906;1509802;1509599;1509773;1509572;1509616;1509604;1509719;1509794;1509680;1509457;1509277;1509173;1509297;1509352;1509335;1509130;1509355;1509285;1509315;1509564;1509753;1509767;1509959;1510436;1510537;1510771;1510822;1510875;1510990;1511174;1511206;1511088;1511181;1511464;1511555;1511795;1511713;1511949;1512010;1512172;1512176;1512262;1512478;1512542;1512569;151261…
141.365228906629;1510129;1510020;1509894;1509750;1510018;1509544;1509552;1509753;1509724;1509705;1509702;1509523;1509283;1509377;1509283;1509308;1509317;1509074;1509332;1509326;1509422;1509490;1509806;1509934;1510113;1510523;1510538;1510813;1510990;1510933;1511020;1511224;1511239;1511399;1511347;1511410;1511658;1511777;1511801;1511836;1512082;1512335;1512301;1512383;1512563;1512525;1512610;151277…
141.467247115504;1509823;1509748;1509745;1509524;1509660;1509508;1509257;1509364;1509555;1509490;1509474;1509274;1509104;1509037;1509115;1509161;1509018;1508991;1509136;1508964;1509050;1509332;1509473;1509598;1509892;1510226;1510373;1510597;1510779;1510733;1510755;1511004;1511120;1510974;1511191;1511236;1511371;1511647;1511647;1511667;1511910;1512123;1512036;1512061;1512346;1512363;1512444;151246…
141.569233592508;1509667;1509664;1509387;1509292;1509528;1509412;1509277;1509304;1509374;1509367;1509256;1509089;1509023;1508843;1508964;1508988;1508897;1508702;1508910;1508851;1509035;1509245;1509482;1509625;1509736;1510040;1510136;1510304;1510595;1510527;1510692;1510785;1510838;1510869;1510891;1511090;1511292;1511394;1511532;1511591;1511545;1511842;1511787;1511988;1512151;1512074;1512295;151231…
141.67118836612;1509638;1509394;1509414;1509367;1509559;1509227;1509096;1509223;1509188;1509187;1509169;1509040;1508851;1508780;1508813;1508934;1508772;1508750;1508909;1508778;1508919;1509050;1509320;1509396;1509749;1510011;1509990;1510237;1510597;1510475;1510541;1510792;1510900;1510753;1510884;1511006;1511050;1511306;1511326;1511401;1511566;1511892;1511721;1511848;1511996;1512052;1512097;1512176…
141.773111464817;1509701;1509613;1509443;1509246;1509507;1509218;1509078;1509304;1509286;1509123;1509238;1509192;1508781;1508881;1508744;1508824;1508763;1508611;1508708;1508777;1508743;1509101;1509359;1509422;1509766;1509958;1510092;1510265;1510501;1510368;1510523;1510681;1510908;1510882;1510846;1511105;1511135;1511324;1511355;1511362;1511511;1511751;1511727;1511890;1512019;1512102;1512024;151240…
141.875002917076;1509765;1509681;1509466;1509350;1509535;1509254;1509140;1509373;1509353;1509412;1509352;1509062;1508928;1509018;1508943;1509016;1508807;1508747;1508807;1508908;1509008;1509162;1509340;1509608;1509773;1510057;1510149;1510421;1510508;1510513;1510760;1510802;1510928;1510997;1510876;1511137;1511284;1511394;1511401;1511521;1511637;1511828;1511984;1511929;1511998;1512111;1512261;151233…
141.976862751374;1509733;1509564;1509453;1509270;1509483;1509217;1509091;1509096;1509226;1509371;1509236;1509140;1508959;1508985;1508846;1508725;1508782;1508748;1508814;1508826;1508917;1509147;1509392;1509582;1509738;1510004;1510112;1510405;1510538;1510489;1510588;1510597;1510887;1510826;1510883;1511146;1511265;1511404;1511378;1511521;1511628;1511835;1511858;1511874;1511995;1512050;1512259;151225…
142.07869099619;1509705;1509649;1509499;1509237;1509322;1509142;1509056;1509214;1509318;1509382;1509139;1509174;1509005;1508779;1508875;1508835;1508778;1508527;1508775;1508736;1508733;1509166;1509269;1509488;1509790;1509895;1509989;1510319;1510420;1510465;1510684;1510785;1510795;1510820;1510888;1511072;1511099;1511261;1511435;1511485;1511592;1511801;1511778;1511895;1512073;1512001;1512138;1512200…
142.18048768;1509632;1509470;1509259;1509171;1509414;1509128;1509144;1509164;1509186;1509244;1509256;1508911;1508956;1508729;1508898;1508912;1508743;1508652;1508804;1508652;1508840;1509012;1509156;1509353;1509591;1510026;1510004;1510169;1510356;1510428;1510510;1510606;1510611;1510719;1510740;1511016;1511010;1511141;1511418;1511337;1511468;1511737;1511828;1511845;1511953;1512004;1511991;1512218;15…
142.282252831282;1509660;1509447;1509374;1509215;1509424;1509152;1509027;1509177;1509199;1509141;1509000;1508989;1509006;1508732;1508706;1508866;1508685;1508657;1508748;1508621;1508831;1509115;1509295;1509455;1509638;1509962;1510068;1510186;1510422;1510469;1510450;1510727;1510806;1510721;1510946;1510935;1511109;1511215;1511105;1511289;1511473;1511679;1511630;1511775;1511995;1511901;1512029;151219…
142.383986478514;1509610;1509499;1509464;1509208;1509270;1509163;1509112;1509178;1509299;1509085;1509203;1509020;1508807;1508738;1508755;1508829;1508709;1508710;1508760;1508781;1508727;1509101;1509227;1509507;1509681;1509881;1510087;1510298;1510283;1510341;1510600;1510759;1510766;1510719;1510882;1511021;1511222;1511251;1511216;1511336;1511431;1511653;1511705;1511894;1511991;1512031;1512137;151207…
142.485688650172;1509568;1509510;1509253;1509099;1509416;1509063;1509088;1509155;1509280;1509230;1509122;1508913;1508758;1508722;1508716;1508697;1508672;1508554;1508646;1508705;1508819;1509086;1509120;1509324;1509652;1509870;1510091;1510242;1510379;1510358;1510522;1510617;1510683;1510754;1510830;1510986;1511022;1511116;1511155;1511253;1511574;1511583;1511732;1511772;1511805;1511889;1512037;151217…
142.587359374735;1509637;1509415;1509269;1509125;1509210;1509048;1509088;1509216;1509166;1509232;1509082;1509014;1508772;1508560;1508847;1508791;1508644;1508515;1508678;1508594;1508812;1508967;1509108;1509371;1509564;1509927;1509959;1510124;1510356;1510423;1510568;1510638;1510647;1510688;1510706;1510837;1511062;1511176;1511338;1511258;1511549;1511688;1511703;1511784;1511938;1511991;1512100;151202…
142.68899868068;1509659;1509407;1509426;1509231;1509284;1509248;1509143;1509161;1509186;1509298;1509154;1508888;1508908;1508883;1508851;1508896;1508720;1508791;1508690;1508897;1508773;1508959;1509195;1509473;1509665;1510031;1510057;1510296;1510363;1510338;1510431;1510678;1510883;1510762;1510672;1510903;1511065;1511279;1511232;1511328;1511621;1511631;1511580;1511863;1512035;1512058;1512150;1512141…
142.790606596484;1509680;1509591;1509348;1509298;1509380;1509205;1509190;1509117;1509280;1509364;1509249;1509085;1508849;1508636;1508975;1508867;1508756;1508773;1508851;1508752;1508740;1509068;1509075;1509429;1509555;1509888;1510188;1510238;1510488;1510492;1510592;1510734;1510849;1510774;1510891;1511076;1511095;1511276;1511278;1511364;1511460;1511738;1511770;1511761;1511987;1511876;1512096;151219…
142.892183150624;1509574;1509578;1509493;1509307;1509330;1509244;1509153;1509387;1509261;1509328;1509196;1509169;1508942;1508856;1508878;1508957;1508763;1508728;1508746;1508809;1508772;1509146;1509223;1509390;1509683;1510155;1510044;1510382;1510460;1510460;1510589;1510738;1510932;1510801;1510896;1511100;1511212;1511342;1511298;1511375;1511555;1511679;1511730;1511798;1512093;1511991;1512158;151217…
142.993728371579;1509569;1509502;1509336;1509107;1509310;1509132;1509120;1509134;1509241;1509274;1509135;1508948;1508858;1508747;1508811;1508842;1508739;1508747;1508692;1508714;1508756;1509074;1509337;1509486;1509549;1510005;1510115;1510242;1510389;1510452;1510407;1510678;1510669;1510797;1510797;1510943;1511014;1511304;1511152;1511359;1511615;1511724;1511646;1511791;1512072;1512047;1512182;151212…
143.095242287825;1509505;1509420;1509270;1509085;1509315;1509042;1508980;1509025;1509103;1509086;1509028;1508841;1508714;1508622;1508769;1508642;1508749;1508461;1508725;1508686;1508820;1508910;1509262;1509428;1509615;1509864;1509891;1510232;1510336;1510247;1510397;1510517;1510576;1510634;1510735;1510897;1511083;1511289;1511235;1511249;1511524;1511669;1511449;1511747;1511964;1511933;1511977;151206…
143.19672492784;1509413;1509235;1509128;1509022;1509066;1509023;1508807;1509025;1509093;1509011;1508920;1508761;1508582;1508527;1508604;1508513;1508475;1508428;1508583;1508520;1508545;1508984;1509049;1509103;1509396;1509780;1509926;1510037;1510110;1510198;1510316;1510415;1510514;1510535;1510509;1510663;1510895;1510936;1511128;1511104;1511231;1511555;1511568;1511595;1511629;1511798;1511880;1511992…
143.298176320101;1509271;1509423;1509191;1509046;1509147;1508971;1508851;1509038;1509040;1509123;1508928;1508688;1508655;1508538;1508588;1508741;1508582;1508528;1508505;1508531;1508569;1508904;1509034;1509214;1509386;1509758;1509827;1510022;1510168;1510224;1510374;1510566;1510482;1510537;1510616;1510789;1510975;1511162;1511037;1511119;1511302;1511478;1511600;1511533;1511775;1511816;1511950;151193…
143.399596493087;1509557;1509415;1509242;1509211;1509302;1509204;1508985;1509125;1509127;1509179;1509185;1508988;1508753;1508585;1508744;1508862;1508549;1508681;1508750;1508653;1508728;1509033;1509234;1509333;1509519;1509887;1509925;1510234;1510401;1510269;1510436;1510667;1510632;1510620;1510852;1510804;1510922;1511142;1511151;1511379;1511401;1511639;1511635;1511775;1511934;1511949;1511951;151210…
143.500985475273;1509396;1509242;1509116;1509021;1509173;1509110;1508940;1508991;1509036;1509144;1509002;1508944;1508701;1508627;1508678;1508819;1508553;1508544;1508643;1508619;1508558;1508821;1509093;1509158;1509495;1509790;1509824;1510169;1510430;1510217;1510511;1510465;1510574;1510610;1510696;1510897;1510864;1511139;1511113;1511270;1511424;1511561;1511525;1511559;1511762;1511919;1511965;151203…
143.602343295139;1509404;1509300;1509287;1509117;1509283;1509217;1508991;1509074;1508976;1508991;1509035;1508898;1508637;1508496;1508540;1508712;1508555;1508451;1508548;1508521;1508544;1508825;1509080;1509383;1509337;1509673;1509763;1510154;1510234;1510103;1510364;1510618;1510741;1510459;1510724;1510840;1510953;1511016;1511161;1511323;1511381;1511434;1511503;1511563;1511779;1511794;1511923;151199…
143.70366998116;1509387;1509206;1509242;1508947;1509192;1508968;1508778;1509117;1509076;1509105;1509103;1508771;1508488;1508585;1508591;1508590;1508657;1508516;1508639;1508584;1508666;1508814;1509005;1509227;1509490;1509752;1509865;1510099;1510119;1510247;1510368;1510524;1510521;1510630;1510646;1510867;1510831;1511025;1511150;1511184;1511347;1511252;1511550;1511663;1511623;1511737;1511896;1512065…
143.804965561815;1509266;1509120;1508943;1508899;1508998;1508782;1508819;1508754;1508841;1508812;1508731;1508603;1508364;1508395;1508410;1508488;1508359;1508330;1508409;1508434;1508470;1508703;1508978;1509091;1509289;1509531;1509568;1509806;1510166;1510193;1510182;1510439;1510340;1510465;1510375;1510580;1510683;1510873;1511009;1510833;1511145;1511293;1511363;1511344;1511485;1511520;1511612;151179…
143.906230065581;1509311;1509075;1508915;1508750;1508957;1508822;1508838;1508894;1508870;1508945;1508801;1508720;1508361;1508390;1508473;1508399;1508279;1508328;1508414;1508380;1508553;1508740;1508858;1509031;1509468;1509597;1509670;1509990;1510164;1510098;1510183;1510349;1510352;1510365;1510343;1510558;1510724;1510850;1510973;1511083;1511170;1511486;1511282;1511484;1511580;1511653;1511775;151175…
144.007463520936;1509207;1509052;1508734;1508629;1508931;1508714;1508496;1508660;1508705;1508754;1508748;1508454;1508412;1508356;1508324;1508267;1508313;1508182;1508227;1508166;1508336;1508495;1508868;1508974;1509211;1509539;1509570;1509753;1510056;1509897;1509984;1510189;1510305;1510282;1510297;1510298;1510517;1510812;1510801;1511053;1510996;1511247;1511132;1511367;1511534;1511605;1511691;151165…
144.108665956356;1509198;1509171;1509095;1508756;1509140;1508805;1508811;1508884;1508885;1509071;1508885;1508621;1508548;1508407;1508532;1508431;1508433;1508455;1508589;1508545;1508653;1508701;1509083;1509106;1509325;1509569;1509652;1509919;1510069;1510004;1510263;1510401;1510459;1510330;1510395;1510581;1510739;1510908;1510938;1511154;1511225;1511495;1511383;1511560;1511643;1511638;1511793;151184…
144.20983740032;1509260;1509100;1509128;1509036;1509102;1508832;1508928;1508893;1508908;1509035;1508849;1508739;1508669;1508425;1508539;1508579;1508506;1508456;1508533;1508352;1508605;1508792;1508930;1509129;1509397;1509545;1509788;1509902;1510127;1510126;1510271;1510385;1510499;1510502;1510502;1510744;1510691;1510988;1511005;1511123;1511282;1511335;1511532;1511568;1511646;1511644;1511638;1511886…
144.310977881305;1509171;1509365;1508980;1508896;1509075;1508949;1508662;1508724;1509022;1508931;1508795;1508757;1508514;1508365;1508449;1508363;1508509;1508372;1508394;1508478;1508603;1508699;1508849;1509084;1509260;1509541;1509670;1509888;1510048;1510007;1510191;1510332;1510353;1510514;1510553;1510610;1510758;1510915;1510882;1511148;1511114;1511446;1511550;1511419;1511625;1511632;1511841;151173…
144.412087427788;1509227;1509319;1509208;1508943;1509146;1509021;1508846;1509056;1509063;1508969;1508999;1508711;1508645;1508484;1508596;1508616;1508542;1508368;1508508;1508520;1508626;1508928;1508994;1509188;1509577;1509717;1509733;1510103;1510089;1510196;1510295;1510455;1510526;1510542;1510583;1510665;1510752;1511086;1511113;1511225;1511298;1511560;1511476;1511536;1511691;1511948;1511794;151199…
144.513166068246;1509183;1509187;1508963;1508971;1509158;1508934;1508767;1508956;1508926;1508853;1508881;1508686;1508658;1508441;1508538;1508578;1508426;1508484;1508335;1508431;1508469;1508830;1509034;1509146;1509374;1509655;1509817;1509945;1510186;1510111;1510113;1510524;1510511;1510285;1510486;1510793;1510643;1510887;1511003;1511084;1511235;1511496;1511384;1511502;1511610;1511737;1511898;151191…
144.614213831158;1509449;1509234;1509258;1509158;1509160;1508980;1508900;1509094;1509100;1509192;1509089;1508853;1508698;1508376;1508647;1508621;1508447;1508517;1508588;1508752;1508751;1508807;1509127;1509351;1509519;1509869;1509852;1510212;1510260;1510329;1510354;1510528;1510545;1510615;1510725;1511110;1511146;1511246;1511272;1511333;1511442;1511500;1511554;1511721;1511998;1511772;1512028;151219…
144.715230745;1509452;1509229;1509145;1509012;1509181;1508994;1508799;1509017;1509182;1509028;1509073;1508820;1508750;1508561;1508672;1508638;1508646;1508477;1508630;1508586;1508638;1508879;1509070;1509261;1509667;1509837;1509878;1510098;1510289;1510301;1510366;1510465;1510642;1510580;1510530;1510931;1511115;1511208;1511208;1511206;1511367;1511451;1511632;1511850;1511807;1511827;1511983;1512028;1…
144.81621683825;1509403;1509520;1509268;1509137;1509289;1509063;1508960;1509072;1509117;1509231;1509229;1508867;1508768;1508607;1508666;1508672;1508721;1508539;1508751;1508697;1508704;1508958;1509162;1509356;1509662;1509907;1509905;1510106;1510349;1510311;1510452;1510567;1510635;1510622;1510730;1510794;1511025;1511008;1511140;1511352;1511410;1511617;1511662;1511721;1511827;1511921;1512055;1512102…
144.917172139386;1509506;1509307;1509243;1508931;1509321;1508987;1508927;1509011;1509110;1509278;1509051;1508888;1508794;1508714;1508509;1508609;1508422;1508495;1508583;1508611;1508724;1508817;1509107;1509254;1509583;1509811;1509829;1510012;1510195;1510211;1510393;1510374;1510524;1510556;1510608;1510708;1510872;1511196;1511266;1511359;1511408;1511457;1511550;1511566;1511825;1511804;1511962;151203…
145.018096676884;1509390;1509357;1509123;1509108;1509191;1508966;1508911;1508996;1508961;1509071;1509086;1508755;1508675;1508489;1508577;1508630;1508506;1508409;1508530;1508643;1508622;1508986;1509126;1509264;1509510;1509820;1509942;1510236;1510446;1510362;1510337;1510531;1510646;1510552;1510695;1510889;1510966;1511105;1511084;1511212;1511343;1511515;1511659;1511651;1511757;1511696;1511946;151200…
145.118990479223;1509375;1509287;1509089;1509006;1509192;1508952;1508746;1509031;1508951;1508976;1508883;1508679;1508639;1508554;1508665;1508530;1508507;1508449;1508427;1508483;1508627;1508903;1509173;1509280;1509461;1509650;1509718;1510050;1510258;1510203;1510289;1510495;1510510;1510410;1510646;1510790;1510837;1510809;1511182;1511087;1511232;1511516;1511382;1511601;1511750;1511647;1511810;151192…
145.21985357488;1509345;1509345;1509106;1508970;1509234;1508975;1508846;1509134;1509019;1509104;1508948;1508735;1508663;1508623;1508620;1508620;1508614;1508499;1508540;1508498;1508607;1508874;1509039;1509360;1509371;1509799;1509887;1510048;1510128;1510206;1510296;1510585;1510624;1510507;1510606;1510751;1510910;1511108;1511107;1511213;1511214;1511512;1511527;1511715;1511761;1511863;1511862;1511995…
145.320685992332;1509445;1509306;1509202;1509036;1509127;1508825;1508734;1509066;1509117;1509069;1508976;1508707;1508593;1508604;1508510;1508768;1508523;1508447;1508636;1508622;1508648;1508911;1508993;1509251;1509397;1509729;1509719;1510068;1510211;1510371;1510334;1510551;1510553;1510487;1510606;1510661;1510811;1511085;1511085;1511209;1511412;1511467;1511566;1511618;1511703;1511824;1511893;151192…
145.421487760056;1509285;1509272;1509111;1508878;1509149;1508922;1508946;1508893;1508889;1508928;1508903;1508723;1508714;1508632;1508578;1508506;1508563;1508305;1508479;1508603;1508644;1508850;1509067;1509083;1509432;1509756;1509826;1509999;1510130;1510204;1510315;1510367;1510459;1510483;1510552;1510737;1510830;1511042;1511018;1511208;1511351;1511450;1511417;1511595;1511754;1511697;1511925;151186…
145.522258906531;1509272;1509082;1509167;1508960;1509032;1508784;1508815;1508851;1508851;1508839;1508645;1508694;1508507;1508411;1508493;1508464;1508475;1508266;1508420;1508394;1508412;1508789;1508888;1509111;1509396;1509656;1509815;1509802;1510167;1510155;1510192;1510505;1510396;1510327;1510517;1510648;1510767;1510943;1510987;1511038;1511121;1511401;1511228;1511424;1511515;1511790;1511782;151184…
145.622999460233;1509313;1509246;1508974;1508871;1508998;1508835;1508835;1508940;1508845;1508947;1508889;1508694;1508603;1508433;1508662;1508466;1508450;1508381;1508365;1508517;1508631;1508635;1508960;1509138;1509320;1509607;1509815;1509951;1509998;1510053;1510339;1510422;1510367;1510490;1510513;1510723;1510803;1511027;1510983;1511033;1511236;1511436;1511300;1511546;1511597;1511623;1511897;151183…
145.72370944964;1509323;1509227;1509196;1509033;1509077;1508913;1508827;1508931;1508955;1508904;1509002;1508864;1508703;1508433;1508564;1508525;1508374;1508378;1508397;1508396;1508616;1508855;1509033;1509112;1509318;1509725;1509799;1510021;1510153;1510223;1510212;1510407;1510559;1510463;1510600;1510759;1510787;1511062;1510995;1511153;1511320;1511477;1511480;1511558;1511664;1511782;1511721;1511781…
145.824388903229;1509331;1509308;1509083;1508975;1509121;1508889;1508777;1508921;1508987;1509050;1508912;1508611;1508710;1508450;1508547;1508582;1508485;1508389;1508640;1508379;1508621;1508802;1509007;1509152;1509390;1509648;1509811;1510090;1510162;1510198;1510272;1510404;1510392;1510404;1510476;1510539;1510844;1511159;1511034;1511122;1511213;1511429;1511550;1511469;1511743;1511685;1511945;151189…
145.925037849479;1509292;1509178;1509047;1508963;1509151;1508999;1508895;1509054;1509052;1509052;1508943;1508726;1508679;1508640;1508554;1508636;1508559;1508426;1508540;1508468;1508563;1508828;1509058;1509338;1509569;1509688;1509891;1510185;1510179;1510219;1510185;1510427;1510492;1510501;1510638;1510758;1510900;1510964;1511073;1511150;1511281;1511509;1511398;1511500;1511718;1511798;1511954;151184…
146.025656316865;1509246;1509168;1509106;1509014;1509019;1508839;1508822;1508909;1509093;1509002;1508994;1508727;1508471;1508601;1508621;1508602;1508471;1508337;1508393;1508425;1508608;1508849;1508872;1509205;1509397;1509746;1509695;1510010;1510300;1510034;1510298;1510540;1510503;1510368;1510402;1510683;1510917;1511021;1510957;1511165;1511325;1511461;1511434;1511616;1511640;1511850;1511802;151186…
146.126244333867;1509372;1509112;1509204;1508942;1509054;1508923;1508886;1508892;1508977;1508827;1508922;1508740;1508506;1508590;1508564;1508514;1508462;1508246;1508397;1508574;1508585;1508762;1509093;1509096;1509354;1509601;1509583;1510045;1510302;1510114;1510199;1510335;1510452;1510405;1510513;1510682;1510790;1510964;1511073;1511098;1511316;1511428;1511365;1511557;1511687;1511741;1511878;151174…
146.22680192896;1509280;1509097;1509024;1508890;1509000;1508890;1508773;1508833;1508750;1508883;1508881;1508706;1508474;1508381;1508344;1508577;1508399;1508269;1508462;1508426;1508468;1508767;1508888;1509094;1509226;1509548;1509652;1509985;1510080;1509855;1510194;1510307;1510417;1510242;1510505;1510576;1510670;1510823;1511011;1511120;1511302;1511196;1511234;1511515;1511533;1511603;1511659;1511706…
146.327329130623;1509205;1509199;1508987;1508874;1509013;1508905;1508835;1508832;1508920;1509021;1508933;1508770;1508628;1508335;1508395;1508538;1508433;1508331;1508449;1508473;1508619;1508877;1509002;1509187;1509343;1509685;1509816;1510025;1510198;1510112;1510176;1510387;1510578;1510392;1510378;1510588;1510791;1511037;1510859;1511157;1511137;1511349;1511268;1511486;1511650;1511717;1511733;151176…
146.427825967333;1509268;1509202;1508940;1508765;1508918;1508862;1508756;1508875;1508731;1508866;1508753;1508610;1508412;1508549;1508328;1508495;1508339;1508326;1508248;1508434;1508500;1508655;1508875;1509088;1509343;1509600;1509571;1509796;1510090;1509965;1510222;1510280;1510208;1510407;1510398;1510549;1510725;1510902;1510825;1511048;1511167;1511244;1511417;1511557;1511577;1511700;1511789;151178…
146.528292467568;1509179;1509113;1509007;1509020;1509146;1508932;1508861;1508910;1508980;1508927;1508892;1508744;1508576;1508490;1508544;1508586;1508395;1508327;1508526;1508452;1508508;1508849;1508966;1509218;1509414;1509699;1509808;1509898;1510171;1510159;1510326;1510411;1510436;1510470;1510507;1510694;1510797;1510993;1510992;1511064;1511115;1511365;1511391;1511454;1511531;1511825;1511822;151184…
146.628728659804;1509202;1509111;1508930;1508766;1508944;1508801;1508541;1508736;1508750;1508830;1508765;1508648;1508427;1508364;1508418;1508441;1508357;1508291;1508432;1508329;1508406;1508595;1508772;1509016;1509219;1509515;1509556;1509982;1509882;1510041;1510072;1510244;1510331;1510275;1510486;1510476;1510573;1510770;1510747;1511010;1511024;1511353;1511246;1511347;1511517;1511532;1511595;151169…
146.72913457252;1509470;1509188;1509280;1509012;1509207;1508992;1508821;1508856;1509095;1509167;1508951;1508780;1508700;1508548;1508481;1508571;1508584;1508508;1508543;1508537;1508624;1508848;1509105;1509303;1509511;1509719;1509819;1510179;1510242;1510294;1510243;1510483;1510513;1510680;1510612;1510741;1510993;1511246;1510992;1511218;1511201;1511358;1511591;1511609;1511845;1511767;1511889;1511983…
146.829510234193;1509266;1509199;1509051;1508875;1509104;1508740;1508733;1508773;1508879;1508939;1508781;1508646;1508561;1508534;1508417;1508398;1508446;1508382;1508433;1508452;1508513;1508752;1509021;1508991;1509368;1509478;1509766;1509948;1510098;1510071;1510153;1510318;1510447;1510344;1510494;1510685;1510799;1510944;1510921;1511111;1511232;1511426;1511167;1511339;1511758;1511568;1511627;151177…
146.929855673299;1509180;1509078;1509023;1508765;1508993;1508816;1508618;1508824;1508824;1508821;1508732;1508627;1508515;1508329;1508455;1508412;1508312;1508392;1508328;1508303;1508359;1508638;1508750;1509016;1509206;1509433;1509524;1509875;1509993;1509819;1510077;1510320;1510350;1510346;1510446;1510614;1510727;1510909;1510891;1510980;1511054;1511238;1511209;1511363;1511547;1511576;1511828;151170…
147.030170918318;1509312;1509095;1509059;1508853;1509091;1508846;1508720;1508779;1508871;1508946;1508856;1508747;1508601;1508413;1508413;1508563;1508342;1508292;1508416;1508485;1508513;1508667;1508917;1509217;1509318;1509734;1509560;1509905;1510180;1510108;1510293;1510341;1510435;1510351;1510460;1510637;1510814;1511045;1510993;1511036;1511305;1511391;1511455;1511501;1511647;1511638;1511806;151174…
147.130455997726;1509129;1508975;1509076;1508818;1508915;1508832;1508672;1508769;1508891;1508714;1508682;1508643;1508501;1508337;1508234;1508390;1508428;1508264;1508398;1508334;1508427;1508592;1508841;1509129;1509178;1509521;1509633;1509889;1510023;1510086;1510105;1510207;1510305;1510244;1510329;1510560;1510625;1510832;1510809;1510936;1511081;1511257;1511208;1511414;1511521;1511598;1511668;151169…
147.23071094;1509103;1509055;1508892;1508802;1509067;1508729;1508719;1508845;1508830;1508940;1508832;1508642;1508470;1508321;1508489;1508396;1508216;1508298;1508254;1508344;1508313;1508591;1508932;1509040;1509257;1509575;1509671;1509935;1510111;1510081;1510074;1510285;1510374;1510402;1510380;1510567;1510776;1510938;1510928;1510923;1511140;1511367;1511308;1511370;1511568;1511519;1511682;1511774;15…
147.330935773618;1509162;1509085;1508929;1508832;1508911;1508846;1508588;1508742;1508745;1508713;1508731;1508534;1508431;1508374;1508212;1508490;1508375;1508240;1508351;1508286;1508382;1508546;1508786;1508954;1509298;1509607;1509485;1509756;1510072;1510117;1510107;1510275;1510192;1510303;1510480;1510704;1510675;1510938;1510854;1511002;1511148;1511278;1511296;1511292;1511481;1511650;1511753;151170…
147.431130527058;1509071;1508978;1508851;1508661;1508786;1508856;1508641;1508745;1508803;1508737;1508603;1508569;1508566;1508226;1508250;1508252;1508228;1508182;1508390;1508227;1508342;1508490;1508839;1509108;1509320;1509508;1509600;1509799;1509915;1510004;1510050;1510311;1510239;1510208;1510329;1510512;1510646;1510840;1510855;1510786;1510926;1511263;1511253;1511269;1511382;1511527;1511547;151174…
147.531295228796;1509172;1509056;1508774;1508767;1508940;1508753;1508686;1508640;1508698;1508647;1508696;1508511;1508439;1508220;1508439;1508494;1508318;1508111;1508283;1508491;1508479;1508660;1508746;1508983;1509225;1509486;1509467;1509819;1510018;1509869;1510016;1510108;1510244;1510284;1510211;1510589;1510627;1510735;1510865;1510902;1511022;1511218;1511185;1511294;1511586;1511691;1511530;151167…
147.631429907311;1509072;1508939;1508947;1508666;1508966;1508600;1508694;1508733;1508713;1508762;1508592;1508469;1508390;1508244;1508396;1508305;1508264;1508178;1508173;1508234;1508343;1508633;1508735;1509063;1509112;1509459;1509461;1509772;1509985;1509826;1510031;1510267;1510190;1510227;1510262;1510535;1510533;1510707;1510777;1510948;1510942;1511115;1511262;1511316;1511440;1511438;1511650;151162…
147.73153459108;1509091;1509026;1508884;1508687;1508857;1508744;1508620;1508760;1508836;1508746;1508667;1508547;1508456;1508165;1508301;1508406;1508208;1508071;1508417;1508257;1508379;1508519;1508704;1509009;1509227;1509629;1509450;1509922;1509879;1509969;1510014;1510329;1510321;1510165;1510351;1510582;1510635;1510767;1510875;1510945;1510985;1511279;1511262;1511398;1511480;1511464;1511583;1511644…
147.83160930858;1509038;1508864;1508916;1508635;1508844;1508594;1508506;1508543;1508695;1508675;1508596;1508560;1508346;1508194;1508256;1508271;1508236;1508184;1508190;1508199;1508276;1508650;1508608;1508885;1509139;1509456;1509557;1509775;1509866;1509874;1509928;1510129;1510146;1510185;1510189;1510465;1510568;1510687;1510816;1510867;1510957;1511187;1511169;1511249;1511499;1511428;1511600;1511609…
147.931654088288;1509075;1508821;1508820;1508692;1508745;1508590;1508464;1508703;1508694;1508745;1508695;1508528;1508379;1508143;1508124;1508326;1508141;1508045;1508395;1508184;1508375;1508553;1508717;1508884;1509062;1509504;1509519;1509751;1509906;1509775;1510021;1510098;1510250;1510238;1510205;1510499;1510519;1510858;1510744;1510842;1510973;1511160;1511100;1511285;1511397;1511396;1511621;151164…
148.031668958683;1508996;1509050;1508965;1508861;1508895;1508585;1508578;1508703;1508678;1508737;1508785;1508512;1508246;1508353;1508399;1508338;1508267;1508146;1508306;1508317;1508309;1508544;1508703;1508910;1509139;1509462;1509536;1509736;1510005;1510004;1509901;1510079;1510222;1510242;1510299;1510496;1510614;1510806;1510818;1510839;1511089;1511173;1511253;1511246;1511517;1511444;1511574;151167…
148.131653948241;1508902;1508832;1508607;1508459;1508638;1508556;1508436;1508492;1508518;1508632;1508593;1508272;1508261;1508181;1508230;1508071;1508071;1507974;1508111;1508123;1508037;1508470;1508526;1508723;1509005;1509313;1509353;1509593;1509701;1509706;1509817;1510021;1510207;1510043;1510096;1510168;1510413;1510617;1510586;1510735;1510733;1510914;1511031;1511027;1511249;1511186;1511412;151137…
148.23160908544;1508860;1508818;1508814;1508597;1508688;1508503;1508438;1508499;1508725;1508577;1508485;1508286;1508204;1508045;1508185;1508245;1508074;1507993;1508150;1508111;1508069;1508440;1508672;1508777;1509079;1509271;1509427;1509671;1509818;1509651;1509837;1510032;1510036;1509993;1510074;1510338;1510403;1510623;1510591;1510724;1510740;1510993;1511004;1511162;1511291;1511241;1511504;1511397…
148.331534398757;1509195;1509168;1508937;1508672;1508788;1508746;1508630;1508759;1508839;1508931;1508872;1508633;1508401;1508380;1508323;1508359;1508335;1508275;1508445;1508349;1508414;1508551;1508873;1508997;1509165;1509415;1509558;1509936;1510094;1510105;1510184;1510280;1510157;1510362;1510276;1510533;1510658;1510759;1510836;1510940;1511121;1511360;1511265;1511377;1511617;1511661;1511551;151178…
148.431429916671;1509255;1509024;1508879;1508818;1509031;1508733;1508773;1508781;1508854;1508980;1508772;1508565;1508367;1508327;1508524;1508378;1508288;1508254;1508313;1508303;1508418;1508722;1508677;1508996;1509178;1509506;1509547;1509896;1510172;1509995;1509993;1510304;1510381;1510261;1510300;1510649;1510584;1510911;1510838;1510970;1511186;1511258;1511318;1511355;1511473;1511634;1511652;151169…
148.531295667657;1509018;1508951;1508837;1508662;1508841;1508543;1508532;1508656;1508620;1508678;1508669;1508536;1508318;1508316;1508322;1508392;1508241;1508128;1508325;1508309;1508225;1508546;1508751;1508904;1509173;1509523;1509457;1509849;1509911;1509799;1510110;1510146;1510158;1510149;1510312;1510358;1510648;1510725;1510772;1510779;1511121;1511235;1511248;1511246;1511476;1511377;1511495;151164…
148.631131680195;1508999;1508858;1508716;1508619;1508794;1508612;1508549;1508595;1508605;1508612;1508470;1508342;1508256;1508231;1508249;1508249;1508150;1508040;1508174;1508125;1508102;1508443;1508547;1508848;1509026;1509338;1509360;1509570;1509840;1509684;1509822;1510158;1510113;1510132;1510073;1510467;1510498;1510596;1510695;1510752;1510831;1511165;1511204;1511202;1511319;1511377;1511535;151146…
148.73093798276;1508880;1509064;1508777;1508767;1508928;1508533;1508560;1508691;1508691;1508720;1508652;1508409;1508438;1508276;1508410;1508121;1508234;1508134;1508334;1508237;1508254;1508526;1508698;1508904;1509157;1509453;1509385;1509716;1509914;1509826;1509974;1510194;1510293;1510239;1510199;1510501;1510657;1510869;1510760;1510827;1511012;1511140;1511276;1511157;1511454;1511401;1511585;1511535…
148.830714603831;1508949;1508843;1508770;1508512;1508859;1508651;1508560;1508591;1508568;1508551;1508619;1508512;1508395;1508347;1508285;1508304;1508227;1508181;1508297;1508184;1508321;1508527;1508678;1508944;1509024;1509481;1509508;1509736;1509869;1509868;1510066;1510284;1510286;1510272;1510280;1510458;1510504;1510658;1510723;1510841;1510936;1511183;1511160;1511277;1511318;1511524;1511540;151160…
148.930461571885;1509010;1508852;1508650;1508540;1508765;1508554;1508325;1508640;1508498;1508539;1508528;1508397;1508139;1508165;1508114;1508095;1508061;1507911;1508245;1508139;1508141;1508427;1508554;1508949;1508903;1509400;1509505;1509646;1509712;1509741;1509729;1510083;1510016;1510168;1510127;1510276;1510351;1510576;1510680;1510780;1510805;1511045;1511058;1511070;1511162;1511420;1511449;151142…
149.0301789154;1509084;1509041;1508973;1508804;1508889;1508553;1508563;1508634;1508648;1508788;1508738;1508438;1508313;1508200;1508411;1508340;1508214;1508069;1508291;1508292;1508347;1508664;1508684;1509052;1509183;1509328;1509458;1509611;1509893;1509917;1509870;1510280;1510286;1510183;1510349;1510370;1510600;1510628;1510812;1510881;1510930;1511117;1511058;1511236;1511232;1511489;1511544;1511542;…
149.129866662852;1509120;1508938;1508808;1508700;1508787;1508520;1508610;1508524;1508573;1508826;1508669;1508523;1508372;1508305;1508187;1508314;1508162;1508236;1508220;1508145;1508266;1508528;1508730;1508894;1509107;1509391;1509709;1509732;1509819;1509918;1509975;1510099;1510254;1510299;1510368;1510400;1510584;1510634;1510659;1510877;1510880;1511069;1511081;1511315;1511418;1511462;1511551;151174…
149.22952484272;1508992;1508984;1508871;1508690;1508848;1508783;1508547;1508597;1508730;1508678;1508654;1508504;1508313;1508218;1508254;1508432;1508116;1508177;1508282;1508201;1508252;1508493;1508585;1508807;1509187;1509390;1509499;1509759;1509854;1509943;1509941;1510198;1510246;1510269;1510257;1510496;1510515;1510686;1510773;1510909;1510930;1511129;1511194;1511205;1511407;1511561;1511578;1511596…
149.329153483481;1509028;1508835;1508703;1508643;1508764;1508513;1508435;1508384;1508547;1508636;1508567;1508280;1508196;1508174;1508098;1508013;1508119;1507984;1508103;1508125;1508127;1508446;1508683;1508852;1508975;1509328;1509230;1509576;1509841;1509812;1509858;1510059;1510131;1510174;1510097;1510403;1510524;1510454;1510529;1510723;1510816;1510978;1511075;1511035;1511185;1511289;1511401;151140…
149.428752613612;1508953;1508915;1508726;1508491;1508830;1508512;1508401;1508543;1508584;1508654;1508412;1508307;1508381;1508117;1508118;1508154;1508072;1507886;1508146;1508203;1508145;1508679;1508710;1508826;1508982;1509258;1509413;1509733;1509720;1509848;1509924;1510183;1510113;1510039;1510215;1510349;1510597;1510814;1510689;1510717;1510884;1511056;1511147;1511174;1511271;1511361;1511447;151153…
149.52832226159;1508843;1508782;1508627;1508492;1508629;1508408;1508482;1508544;1508495;1508581;1508535;1508408;1508153;1508057;1508048;1508236;1508193;1508007;1508072;1508077;1508208;1508417;1508578;1508719;1509097;1509354;1509295;1509632;1509813;1509714;1509895;1510060;1510104;1510072;1510178;1510332;1510327;1510461;1510682;1510575;1510813;1511062;1511015;1511157;1511226;1511252;1511353;1511523…
149.627862455894;1508868;1508891;1508844;1508555;1508700;1508492;1508407;1508539;1508584;1508668;1508668;1508398;1508125;1508126;1508202;1508112;1508085;1508120;1508168;1508056;1508140;1508439;1508761;1508874;1509039;1509467;1509482;1509715;1509699;1509674;1509951;1509967;1510057;1510111;1510189;1510372;1510368;1510536;1510660;1510856;1510934;1510962;1511029;1511187;1511293;1511328;1511440;151151…
149.727373225;1508900;1508869;1508736;1508542;1508701;1508636;1508277;1508608;1508602;1508587;1508544;1508270;1508260;1508046;1508092;1508227;1508058;1507912;1508081;1508010;1508192;1508295;1508563;1508906;1509024;1509308;1509484;1509541;1509699;1509751;1509970;1509975;1510027;1510030;1510204;1510315;1510459;1510600;1510646;1510639;1510821;1510985;1511008;1511172;1511227;1511361;1511456;1511433;1…
149.826854597386;1508844;1508795;1508666;1508467;1508635;1508299;1508339;1508440;1508509;1508354;1508420;1508462;1508126;1508087;1508104;1508136;1508023;1507957;1508170;1508080;1508191;1508359;1508464;1508645;1508818;1509303;1509288;1509450;1509617;1509656;1509899;1510037;1509956;1510012;1510023;1510274;1510485;1510464;1510543;1510546;1510884;1510978;1511078;1511108;1511210;1511238;1511418;151141…
149.92630660153;1509059;1509029;1508917;1508827;1508792;1508693;1508621;1508701;1508657;1508875;1508636;1508628;1508404;1508302;1508313;1508435;1508324;1508163;1508316;1508351;1508270;1508653;1508784;1508982;1509115;1509388;1509638;1509760;1510025;1510025;1509997;1510181;1510219;1510263;1510419;1510492;1510640;1510840;1510936;1510985;1511000;1511204;1511181;1511398;1511536;1511492;1511563;1511549…
150.025729265908;1508950;1508858;1508773;1508490;1508679;1508590;1508471;1508456;1508747;1508647;1508501;1508275;1508261;1508206;1508220;1508201;1508153;1508045;1508141;1508198;1508196;1508522;1508659;1508843;1509063;1509371;1509423;1509574;1509750;1509744;1509957;1510059;1510146;1510207;1510184;1510381;1510493;1510658;1510621;1510743;1510865;1510971;1511065;1511122;1511281;1511270;1511477;151139…
150.125122618999;1508846;1508678;1508565;1508498;1508619;1508415;1508372;1508348;1508541;1508462;1508428;1508293;1508268;1507975;1508002;1507985;1507942;1507913;1508040;1507981;1508073;1508287;1508558;1508639;1508835;1509262;1509175;1509645;1509688;1509632;1509797;1509873;1509928;1510024;1510103;1510155;1510434;1510512;1510533;1510706;1510803;1510971;1510940;1511028;1511167;1511263;1511260;151143…
150.22448668928;1509128;1508940;1508771;1508623;1508875;1508564;1508479;1508672;1508595;1508766;1508615;1508521;1508189;1508287;1508192;1508260;1508158;1508148;1508260;1508174;1508241;1508646;1508797;1508834;1509115;1509359;1509396;1509657;1509866;1509900;1509974;1510173;1510054;1510128;1510134;1510381;1510516;1510674;1510736;1510905;1510964;1510966;1511178;1511184;1511408;1511505;1511496;1511642…
150.323821505228;1509123;1509049;1508969;1508869;1508919;1508541;1508586;1508664;1508683;1508728;1508679;1508498;1508460;1508339;1508354;1508238;1508189;1508203;1508192;1508282;1508421;1508569;1508689;1509039;1509183;1509583;1509463;1509669;1510012;1509896;1510106;1510256;1510306;1510021;1510334;1510574;1510516;1510792;1510752;1510906;1510930;1511299;1511203;1511255;1511475;1511395;1511536;151163…
150.42312709532;1509048;1508922;1508823;1508602;1508804;1508528;1508511;1508652;1508670;1508717;1508650;1508498;1508431;1508211;1508424;1508289;1508221;1508058;1508317;1508227;1508209;1508444;1508646;1508890;1509094;1509288;1509567;1509677;1509916;1509891;1509910;1510196;1510091;1510119;1510241;1510456;1510537;1510862;1510615;1510929;1510900;1511219;1511233;1511094;1511331;1511496;1511637;1511649…
150.522403488035;1509105;1509093;1508846;1508796;1508834;1508619;1508507;1508638;1508743;1508704;1508689;1508390;1508272;1508323;1508256;1508289;1508244;1508157;1508346;1508255;1508292;1508528;1508768;1508859;1509110;1509369;1509456;1509685;1509891;1509864;1510009;1510318;1510332;1510388;1510124;1510548;1510633;1510816;1510813;1510874;1510963;1511206;1511145;1511292;1511303;1511445;1511562;151163…
150.621650711849;1509139;1509032;1508885;1508714;1508993;1508722;1508639;1508727;1508770;1508703;1508743;1508515;1508418;1508251;1508375;1508350;1508324;1508222;1508275;1508326;1508412;1508689;1508743;1509020;1509110;1509458;1509562;1509775;1509970;1509808;1510032;1510150;1510314;1510244;1510264;1510485;1510652;1510808;1510876;1510984;1511071;1511212;1511191;1511394;1511499;1511428;1511574;151157…
150.72086879524;1508907;1508909;1508679;1508662;1508831;1508580;1508514;1508539;1508650;1508712;1508569;1508419;1508255;1507981;1508271;1508086;1508107;1508076;1507983;1508022;1508198;1508461;1508495;1508731;1509122;1509343;1509471;1509565;1509742;1509794;1509919;1510077;1510006;1510183;1510349;1510322;1510364;1510566;1510581;1510784;1510856;1510950;1510996;1511273;1511436;1511402;1511535;1511451…
150.820057766685;1509134;1508961;1508806;1508676;1508871;1508644;1508629;1508631;1508607;1508653;1508703;1508457;1508169;1508142;1508341;1508206;1508297;1508187;1508280;1508222;1508265;1508476;1508680;1508899;1509084;1509380;1509517;1509670;1509800;1509893;1510038;1510081;1510155;1510174;1510260;1510487;1510538;1510757;1510868;1510826;1510855;1511249;1511197;1511302;1511378;1511454;1511453;151163…
150.919217654663;1508979;1509026;1508866;1508811;1508899;1508601;1508577;1508543;1508803;1508760;1508708;1508429;1508292;1508331;1508301;1508251;1508314;1508156;1508261;1508272;1508430;1508595;1508715;1508940;1509171;1509527;1509469;1509718;1509964;1509951;1509926;1510174;1510220;1510113;1510198;1510422;1510662;1510793;1510800;1510913;1510963;1511087;1511090;1511367;1511518;1511323;1511562;151166…
151.018348487649;1509204;1508946;1508728;1508828;1508737;1508648;1508491;1508805;1508673;1508730;1508770;1508539;1508401;1508336;1508376;1508326;1508220;1508160;1508312;1508167;1508317;1508554;1508893;1509037;1509087;1509427;1509497;1509869;1509952;1509885;1510049;1510321;1510166;1510151;1510315;1510597;1510515;1510680;1510673;1510922;1511066;1511112;1511228;1511283;1511511;1511446;1511611;151158…
151.117450294123;1509026;1508831;1508756;1508662;1508753;1508500;1508372;1508615;1508593;1508647;1508637;1508407;1508420;1508146;1508129;1508247;1508058;1507913;1508238;1508129;1508238;1508442;1508599;1508896;1509096;1509393;1509382;1509754;1509769;1509868;1509824;1509988;1510002;1510183;1510142;1510349;1510567;1510604;1510661;1510703;1510963;1511043;1510988;1511306;1511289;1511356;1511515;151144…
151.21652310256;1509018;1508922;1508759;1508608;1508831;1508590;1508574;1508716;1508555;1508795;1508672;1508441;1508411;1508246;1508310;1508262;1508142;1508102;1508352;1508296;1508287;1508422;1508636;1508894;1509071;1509427;1509408;1509685;1509959;1509797;1509971;1510145;1510132;1510039;1510237;1510329;1510498;1510762;1510732;1510775;1510806;1511100;1511070;1511237;1511236;1511438;1511521;1511618…
151.315566941439;1508894;1508849;1508626;1508448;1508797;1508563;1508271;1508655;1508514;1508617;1508659;1508185;1508228;1508162;1508158;1508070;1508083;1508003;1508227;1508071;1508030;1508392;1508623;1508808;1509082;1509283;1509393;1509626;1509700;1509820;1509899;1510082;1510027;1510143;1510172;1510341;1510447;1510610;1510709;1510600;1510833;1511206;1510943;1511100;1511303;1511215;1511392;151150…
151.414581839237;1508797;1508719;1508564;1508460;1508639;1508471;1508324;1508275;1508540;1508519;1508411;1508259;1507981;1508073;1508083;1508040;1508025;1507980;1508057;1508024;1508071;1508333;1508536;1508726;1508898;1509294;1509185;1509424;1509615;1509534;1509772;1509926;1509984;1509932;1509990;1510101;1510462;1510463;1510524;1510539;1510680;1510876;1510847;1510989;1511086;1511284;1511322;151125…
151.513567824432;1508972;1508728;1508620;1508506;1508693;1508551;1508367;1508512;1508511;1508439;1508529;1508211;1508099;1508217;1508081;1508097;1508012;1508017;1508081;1507987;1508109;1508424;1508547;1508693;1508985;1509254;1509352;1509563;1509651;1509738;1509820;1510045;1509998;1510046;1510238;1510276;1510445;1510601;1510595;1510615;1510687;1510960;1510932;1511040;1511282;1511343;1511344;151131…
151.6125249255;1509121;1509008;1508856;1508647;1508912;1508658;1508659;1508654;1508741;1508693;1508575;1508608;1508474;1508329;1508274;1508400;1508253;1508188;1508234;1508293;1508322;1508497;1508787;1509015;1509128;1509489;1509524;1509772;1509997;1509948;1510087;1510100;1510361;1510263;1510314;1510553;1510707;1510786;1510724;1510885;1511069;1511179;1511163;1511372;1511461;1511593;1511733;1511588;…
151.71145317092;1509051;1508880;1508876;1508688;1508841;1508606;1508597;1508738;1508725;1508744;1508661;1508471;1508453;1508306;1508306;1508364;1508184;1508113;1508339;1508257;1508271;1508327;1508768;1508810;1509175;1509370;1509493;1509672;1509934;1509887;1509986;1510258;1510253;1510258;1510350;1510465;1510573;1510702;1510702;1510909;1510977;1511171;1511140;1511208;1511448;1511472;1511538;1511768…
151.810352589169;1509051;1508925;1508858;1508747;1508871;1508697;1508693;1508731;1508728;1508766;1508809;1508543;1508387;1508273;1508255;1508310;1508257;1508210;1508309;1508245;1508428;1508705;1508752;1508999;1509091;1509512;1509598;1509711;1509936;1509874;1509918;1510126;1510256;1510219;1510388;1510540;1510662;1510786;1510855;1510870;1511121;1511152;1511140;1511199;1511301;1511541;1511606;151158…
151.909223208724;1509140;1508932;1508999;1508658;1508884;1508773;1508635;1508749;1508789;1508793;1508720;1508522;1508481;1508255;1508396;1508414;1508285;1508196;1508387;1508386;1508390;1508641;1508888;1509043;1509228;1509501;1509529;1509897;1509972;1509925;1510074;1510240;1510192;1510220;1510243;1510554;1510789;1510657;1510917;1510901;1511061;1511288;1511237;1511339;1511655;1511430;1511610;151164…
152.008065058062;1509087;1509004;1508806;1508726;1508836;1508644;1508629;1508710;1508794;1508737;1508728;1508494;1508451;1508327;1508249;1508375;1508277;1508235;1508292;1508301;1508286;1508523;1508802;1508910;1509199;1509379;1509464;1509887;1509892;1509919;1510122;1510160;1510166;1510287;1510153;1510491;1510500;1510838;1510768;1510960;1510967;1511289;1511143;1511423;1511426;1511500;1511568;151165…
152.106878165662;1509091;1508995;1508905;1508645;1508921;1508719;1508656;1508540;1508591;1508727;1508603;1508440;1508384;1508135;1508243;1508373;1508207;1508175;1508382;1508307;1508284;1508554;1508731;1508946;1509298;1509422;1509623;1509671;1509875;1509891;1509950;1510110;1510205;1510162;1510256;1510481;1510577;1510693;1510808;1510805;1510905;1511138;1511147;1511212;1511448;1511575;1511564;151159…
152.20566256;1509076;1509056;1508904;1508702;1509042;1508729;1508682;1508676;1508761;1508778;1508680;1508572;1508418;1508373;1508384;1508383;1508218;1508220;1508385;1508326;1508334;1508591;1508957;1509036;1509249;1509388;1509562;1509841;1509928;1509938;1510057;1510317;1510223;1510382;1510239;1510550;1510642;1510842;1510888;1510974;1510941;1511228;1511321;1511512;1511537;1511495;1511683;1511724;15…
152.304418269554;1508978;1508767;1508780;1508473;1508631;1508458;1508490;1508528;1508633;1508476;1508432;1508289;1508147;1508085;1508132;1508265;1508206;1508006;1508160;1508114;1508266;1508498;1508681;1508849;1509074;1509386;1509403;1509529;1509890;1509805;1509862;1510088;1510115;1510134;1510252;1510297;1510462;1510569;1510569;1510752;1510879;1511060;1511050;1511231;1511352;1511304;1511409;151138…
152.403145322802;1509127;1508978;1508819;1508804;1508952;1508687;1508580;1508722;1508642;1508735;1508634;1508473;1508390;1508415;1508274;1508393;1508389;1508133;1508326;1508346;1508408;1508589;1508872;1508940;1509233;1509354;1509481;1509862;1509911;1509950;1510015;1510146;1510218;1510365;1510171;1510495;1510472;1510780;1510892;1510924;1510940;1511141;1511152;1511330;1511428;1511430;1511520;151163…
152.50184374822;1509245;1509139;1509028;1508808;1509096;1508973;1508776;1508836;1508881;1508896;1508831;1508708;1508524;1508419;1508435;1508503;1508582;1508434;1508445;1508442;1508467;1508762;1508925;1509122;1509322;1509677;1509665;1510016;1510170;1510107;1510162;1510447;1510506;1510468;1510383;1510596;1510751;1510908;1510926;1511049;1511167;1511407;1511209;1511459;1511477;1511649;1511744;1511812…
152.600513574287;1509141;1508976;1508872;1508688;1508897;1508594;1508501;1508638;1508639;1508862;1508731;1508410;1508496;1508286;1508332;1508381;1508191;1508203;1508426;1508212;1508401;1508641;1508870;1509010;1509119;1509384;1509500;1509812;1509956;1509922;1509947;1510157;1510305;1510387;1510279;1510400;1510731;1510746;1510765;1510869;1511126;1511158;1511164;1511264;1511445;1511441;1511685;151162…
152.69915482948;1509091;1509027;1508798;1508706;1508863;1508774;1508635;1508652;1508610;1508724;1508650;1508460;1508390;1508282;1508282;1508256;1508163;1508266;1508307;1508111;1508384;1508622;1508833;1509007;1509121;1509494;1509483;1509791;1510006;1509998;1509990;1510106;1510132;1510207;1510320;1510502;1510577;1510746;1510761;1510781;1511024;1511134;1511096;1511259;1511375;1511532;1511562;1511665…
152.797767542276;1509267;1509040;1508852;1508923;1508738;1508723;1508588;1508789;1508856;1508778;1508698;1508530;1508371;1508416;1508253;1508442;1508306;1508192;1508355;1508250;1508418;1508695;1508792;1509045;1509273;1509593;1509638;1509720;1510142;1510051;1510133;1510186;1510312;1510346;1510345;1510566;1510570;1510707;1510853;1511023;1511098;1511269;1511201;1511291;1511311;1511533;1511650;151160…
152.896351741152;1509067;1508943;1508871;1508599;1508829;1508663;1508655;1508528;1508797;1508663;1508640;1508585;1508334;1508229;1508300;1508196;1508251;1508108;1508311;1508214;1508250;1508546;1508709;1508861;1509140;1509353;1509514;1509741;1509821;1509901;1509851;1510132;1510105;1510227;1510272;1510493;1510567;1510714;1510835;1510809;1510990;1511369;1511172;1511282;1511496;1511429;1511554;151149…
152.994907454587;1508966;1508897;1508887;1508572;1508664;1508664;1508524;1508533;1508626;1508566;1508616;1508372;1508360;1508176;1508215;1508183;1508155;1507964;1508204;1508046;1508201;1508497;1508626;1508836;1509078;1509396;1509406;1509621;1509762;1509810;1510009;1510128;1510112;1510251;1510200;1510348;1510398;1510715;1510720;1510742;1510936;1511028;1511030;1511130;1511353;1511367;1511522;151156…
153.093434711057;1508978;1508861;1508808;1508497;1508729;1508567;1508488;1508652;1508664;1508697;1508602;1508387;1508286;1508193;1508210;1508173;1508176;1508090;1508112;1508166;1508188;1508392;1508646;1508813;1509058;1509400;1509345;1509680;1509760;1509780;1509885;1510100;1510170;1510188;1510168;1510345;1510493;1510676;1510654;1510714;1510843;1511019;1510884;1511180;1511307;1511366;1511433;151151…
153.19193353904;1508935;1508824;1508621;1508592;1508640;1508599;1508491;1508547;1508676;1508637;1508719;1508508;1508379;1508300;1508131;1508282;1508099;1508197;1508224;1508170;1508154;1508416;1508657;1508858;1509047;1509324;1509313;1509765;1509948;1510031;1509942;1510185;1510226;1510237;1510289;1510316;1510619;1510735;1510843;1510829;1511063;1511063;1511112;1511314;1511302;1511499;1511521;1511686…
153.290403967013;1508849;1508818;1508678;1508513;1508878;1508649;1508336;1508572;1508646;1508588;1508447;1508399;1508444;1508176;1508219;1508287;1508088;1508024;1508229;1508160;1508273;1508489;1508594;1508830;1509046;1509469;1509414;1509625;1509830;1509830;1509998;1510019;1510222;1510153;1510267;1510337;1510347;1510713;1510697;1510664;1511027;1510965;1511157;1511238;1511342;1511405;1511440;151148…
153.388846023455;1509024;1508839;1508808;1508607;1508786;1508646;1508505;1508576;1508600;1508553;1508562;1508340;1508221;1508147;1508053;1508282;1508030;1508017;1508115;1507996;1508246;1508496;1508448;1508840;1509066;1509290;1509437;1509568;1509782;1509723;1509925;1509993;1510148;1510105;1510194;1510202;1510421;1510503;1510646;1510735;1510870;1510993;1511167;1511210;1511204;1511303;1511395;151140…
153.487259736841;1508893;1508755;1508550;1508459;1508697;1508591;1508372;1508593;1508518;1508457;1508401;1508238;1508163;1508078;1508029;1508089;1507973;1507987;1508167;1508022;1508117;1508409;1508572;1508655;1509011;1509213;1509280;1509551;1509719;1509628;1509907;1509956;1510125;1510028;1510040;1510171;1510322;1510519;1510587;1510682;1510807;1510910;1511018;1511100;1511191;1511302;1511254;151137…
153.585645135651;1508871;1508885;1508739;1508562;1508758;1508424;1508523;1508538;1508600;1508679;1508624;1508425;1508359;1508187;1508190;1508274;1508130;1507987;1508059;1508065;1508162;1508477;1508582;1508752;1509057;1509237;1509428;1509687;1509966;1509646;1509832;1510104;1510032;1510092;1510133;1510310;1510351;1510713;1510687;1510678;1510795;1510996;1511008;1511098;1511206;1511327;1511455;151141…
153.68400224836;1508873;1508857;1508684;1508601;1508685;1508608;1508422;1508582;1508611;1508578;1508616;1508302;1508293;1508280;1508292;1508203;1508097;1508041;1508280;1508240;1508184;1508478;1508619;1508819;1508950;1509305;1509512;1509674;1509771;1509702;1509795;1510092;1510171;1510006;1510265;1510433;1510555;1510568;1510584;1510769;1510796;1511102;1511059;1511137;1511209;1511361;1511462;1511501…
153.782331103447;1508873;1508885;1508567;1508591;1508728;1508569;1508339;1508458;1508495;1508618;1508542;1508411;1508213;1508104;1508258;1508177;1508160;1508118;1508098;1508122;1508159;1508441;1508554;1508806;1508957;1509435;1509284;1509667;1509815;1509777;1509857;1510064;1510055;1510041;1510021;1510284;1510485;1510509;1510576;1510750;1510824;1511010;1510945;1511154;1511169;1511366;1511531;151150…
153.880631729389;1508863;1508830;1508572;1508505;1508766;1508400;1508358;1508476;1508501;1508523;1508489;1508202;1508202;1508056;1508085;1508215;1508078;1508027;1508052;1507991;1508100;1508217;1508560;1508647;1509007;1509286;1509312;1509595;1509708;1509667;1509675;1509902;1509915;1510089;1509973;1510233;1510520;1510470;1510681;1510547;1510706;1510907;1510992;1511149;1511312;1511404;1511327;151135…
153.978904154664;1509056;1508899;1508719;1508626;1508771;1508577;1508457;1508545;1508627;1508722;1508593;1508401;1508125;1508092;1508129;1508306;1508211;1508099;1508187;1508163;1508272;1508440;1508723;1508840;1509002;1509429;1509340;1509771;1509849;1509827;1509771;1510020;1510044;1510234;1510087;1510315;1510403;1510642;1510723;1510720;1510816;1511002;1510935;1511199;1511359;1511256;1511544;151146…
154.077148407748;1508904;1508725;1508579;1508443;1508624;1508304;1508322;1508510;1508546;1508453;1508441;1508263;1508212;1507930;1508012;1508304;1507982;1507853;1508085;1508016;1508112;1508264;1508540;1508737;1508892;1509202;1509410;1509562;1509729;1509616;1509739;1509957;1510061;1510024;1509980;1510201;1510282;1510444;1510483;1510667;1510792;1510987;1510974;1511009;1511243;1511301;1511446;151136…
154.17536451712;1508905;1508747;1508501;1508431;1508627;1508454;1508376;1508562;1508528;1508369;1508396;1508182;1508145;1508009;1508114;1508099;1508048;1507905;1508128;1507966;1508084;1508228;1508471;1508701;1509001;1509215;1509227;1509490;1509621;1509640;1509781;1509947;1509829;1510070;1510046;1510176;1510333;1510438;1510485;1510603;1510825;1511014;1510884;1511075;1511148;1511101;1511444;1511385…
154.273552511257;1508999;1508779;1508768;1508656;1508764;1508584;1508429;1508495;1508652;1508688;1508473;1508437;1508235;1508081;1508217;1508321;1508103;1507976;1508187;1508229;1508196;1508436;1508812;1508831;1509008;1509391;1509311;1509693;1509684;1509915;1509807;1510095;1510185;1510211;1510096;1510442;1510452;1510635;1510710;1510780;1510875;1511135;1511043;1511149;1511304;1511347;1511389;151142…
154.371712418635;1508887;1508999;1508587;1508577;1508719;1508602;1508442;1508556;1508546;1508650;1508580;1508455;1508243;1508127;1508224;1508129;1508090;1508114;1508281;1508075;1508196;1508476;1508662;1508813;1508992;1509314;1509294;1509730;1509773;1509863;1509818;1510031;1510051;1510061;1510155;1510240;1510424;1510514;1510566;1510707;1510762;1510996;1511148;1511141;1511330;1511310;1511402;151146…
154.469844267734;1508914;1508770;1508539;1508471;1508580;1508551;1508348;1508501;1508490;1508448;1508491;1508351;1508179;1508116;1507996;1508104;1507942;1507982;1508202;1508222;1508172;1508431;1508507;1508787;1508970;1509199;1509418;1509470;1509731;1509652;1509747;1510027;1509939;1509962;1510111;1510205;1510356;1510474;1510508;1510735;1510771;1511072;1511035;1511123;1511292;1511265;1511271;151146…
154.56794808703;1508822;1508753;1508663;1508417;1508692;1508394;1508208;1508488;1508457;1508580;1508538;1508172;1508056;1508047;1508109;1508066;1508113;1507924;1507926;1508142;1508122;1508425;1508550;1508792;1508993;1509307;1509223;1509609;1509751;1509591;1509829;1509932;1509930;1510085;1510043;1510279;1510419;1510597;1510416;1510629;1510840;1510921;1510975;1511120;1511172;1511311;1511310;1511496…
154.666023905;1508888;1508667;1508663;1508386;1508713;1508431;1508354;1508476;1508520;1508466;1508376;1508400;1508276;1508169;1508089;1508085;1508098;1507936;1508159;1508056;1508109;1508308;1508401;1508691;1508928;1509275;1509340;1509548;1509726;1509591;1509787;1510030;1510153;1510060;1510109;1510159;1510296;1510542;1510556;1510660;1510726;1511018;1510928;1511248;1511198;1511215;1511309;1511437;1…
154.764071750122;1508827;1508683;1508584;1508520;1508617;1508316;1508153;1508397;1508494;1508462;1508423;1508221;1508101;1507934;1507984;1508014;1507929;1507813;1507909;1507992;1508007;1508351;1508432;1508708;1508789;1509131;1509262;1509464;1509644;1509645;1509823;1509950;1509898;1509961;1509960;1510220;1510351;1510423;1510441;1510424;1510787;1510888;1510822;1511027;1511117;1511201;1511357;151117…
154.862091650874;1508825;1508668;1508560;1508424;1508612;1508293;1508360;1508324;1508442;1508487;1508431;1508129;1508055;1507968;1507914;1507975;1507969;1507925;1507971;1507982;1508039;1508244;1508385;1508570;1508789;1509144;1509373;1509501;1509540;1509556;1509647;1509920;1509916;1509947;1510013;1510204;1510220;1510388;1510505;1510467;1510746;1510823;1510903;1511105;1511095;1511224;1511246;151133…
154.960083635733;1508690;1508470;1508491;1508158;1508456;1508241;1508233;1508263;1508381;1508432;1508242;1508031;1507874;1507984;1507866;1507884;1507774;1507679;1507847;1507916;1507905;1508064;1508333;1508533;1508756;1508966;1508989;1509397;1509633;1509529;1509668;1509761;1509946;1509754;1509850;1510033;1510119;1510314;1510313;1510527;1510680;1510824;1510616;1510863;1511005;1510958;1511155;151119…
155.058047733175;1508860;1508913;1508718;1508443;1508787;1508418;1508203;1508455;1508594;1508481;1508548;1508261;1508068;1508065;1508003;1508144;1508010;1507899;1508138;1508019;1508050;1508450;1508499;1508742;1508997;1509132;1509263;1509567;1509808;1509580;1509820;1509982;1509805;1510050;1510008;1510200;1510267;1510472;1510622;1510694;1510814;1510934;1510973;1511107;1511265;1511238;1511449;151132…
155.15598397168;1509025;1508908;1508773;1508663;1508787;1508526;1508566;1508596;1508566;1508603;1508607;1508354;1508118;1508105;1508146;1508219;1508031;1508160;1508202;1508245;1508314;1508533;1508544;1508870;1509066;1509248;1509461;1509631;1509883;1509679;1509930;1510095;1510119;1510051;1510134;1510424;1510554;1510671;1510698;1510628;1510907;1511106;1511004;1511149;1511360;1511283;1511497;1511561…
155.253892379724;1509004;1509000;1508861;1508622;1508816;1508670;1508572;1508592;1508698;1508752;1508543;1508451;1508315;1508247;1508103;1508241;1508191;1508151;1508317;1508309;1508289;1508479;1508536;1508925;1509095;1509411;1509483;1509727;1509789;1509894;1510094;1510062;1510178;1510123;1510254;1510501;1510610;1510636;1510680;1510828;1511020;1511107;1511157;1511213;1511497;1511460;1511502;151158…
155.351772985784;1508978;1508879;1508777;1508664;1508778;1508482;1508458;1508545;1508624;1508767;1508473;1508421;1508248;1508247;1508139;1508197;1508054;1508125;1508227;1508160;1508263;1508418;1508737;1508952;1509180;1509454;1509575;1509768;1509846;1509847;1510185;1510154;1510040;1510145;1510186;1510488;1510533;1510602;1510807;1510723;1510876;1511115;1511095;1511236;1511330;1511407;1511456;151144…
155.449625818339;1508881;1508802;1508602;1508599;1508672;1508561;1508635;1508515;1508618;1508663;1508566;1508361;1508213;1508188;1508177;1508171;1508214;1508073;1508106;1508200;1508090;1508490;1508634;1508842;1508895;1509340;1509514;1509698;1509790;1509704;1509877;1510197;1510066;1510243;1510087;1510407;1510525;1510614;1510771;1510642;1510783;1511174;1511080;1511035;1511208;1511413;1511496;151148…
155.547450905865;1509089;1508872;1508697;1508647;1508711;1508607;1508369;1508531;1508694;1508704;1508613;1508328;1508337;1508239;1508242;1508369;1508244;1508042;1508237;1508190;1508204;1508380;1508703;1508927;1509164;1509441;1509546;1509711;1509967;1509717;1509911;1510071;1510224;1510144;1510159;1510289;1510391;1510656;1510719;1510796;1510964;1510986;1511043;1511089;1511392;1511407;1511418;151159…
155.64524827684;1508915;1508927;1508601;1508568;1508777;1508510;1508467;1508518;1508660;1508685;1508634;1508263;1508325;1508195;1508184;1508240;1508307;1508065;1508233;1508250;1508312;1508680;1508592;1508930;1509160;1509394;1509515;1509714;1509788;1509730;1509879;1510074;1510090;1510058;1510064;1510388;1510566;1510655;1510673;1510681;1510944;1511067;1511036;1511102;1511327;1511271;1511524;1511489…
155.743017959741;1508831;1508783;1508591;1508574;1508790;1508563;1508419;1508499;1508549;1508522;1508514;1508242;1508149;1508043;1508194;1508285;1508071;1507957;1508091;1508001;1508189;1508357;1508527;1508787;1509023;1509209;1509376;1509599;1509849;1509738;1509792;1509950;1510070;1509994;1510105;1510299;1510400;1510518;1510555;1510731;1510966;1510895;1510996;1511109;1511312;1511192;1511331;151146…
155.840759983047;1508907;1508623;1508765;1508518;1508638;1508665;1508441;1508446;1508536;1508415;1508733;1508335;1508224;1508176;1508115;1508113;1508082;1508068;1508120;1508057;1508174;1508456;1508465;1508707;1509045;1509364;1509360;1509732;1509736;1509841;1509870;1510017;1510143;1510061;1510075;1510307;1510498;1510643;1510612;1510806;1510734;1511027;1510940;1511036;1511333;1511308;1511365;151150…
155.938474375233;1508823;1508629;1508495;1508425;1508504;1508309;1508237;1508467;1508597;1508411;1508413;1508239;1508178;1507961;1507966;1508104;1507908;1507906;1508000;1507884;1508033;1508301;1508568;1508710;1508803;1509317;1509313;1509433;1509689;1509696;1509710;1509962;1509976;1509933;1509975;1510084;1510280;1510513;1510557;1510592;1510708;1510863;1511029;1510983;1511159;1511242;1511230;151130…
156.036161164779;1508813;1508704;1508542;1508368;1508627;1508486;1508218;1508403;1508538;1508546;1508377;1508171;1508087;1507992;1507963;1508002;1507897;1507828;1508071;1508098;1508075;1508261;1508609;1508770;1508981;1509101;1509240;1509517;1509664;1509688;1509620;1509876;1510053;1509842;1510044;1510059;1510325;1510449;1510557;1510602;1510672;1510881;1510828;1511020;1511260;1511173;1511236;151136…
156.13382038016;1508840;1508682;1508601;1508451;1508675;1508589;1508352;1508499;1508501;1508443;1508518;1508128;1508117;1507975;1508088;1508071;1508031;1507925;1508125;1507870;1508130;1508343;1508469;1508738;1508841;1509198;1509308;1509542;1509735;1509615;1509857;1510017;1510018;1509970;1509951;1510172;1510430;1510489;1510470;1510741;1510766;1511003;1510870;1511087;1511288;1511136;1511416;1511347…
156.231452049855;1508822;1508590;1508586;1508500;1508564;1508462;1508382;1508285;1508506;1508535;1508436;1508313;1508162;1507998;1508033;1508112;1508027;1507800;1508005;1507998;1508059;1508277;1508500;1508717;1508832;1509150;1509347;1509409;1509647;1509494;1509708;1509915;1510060;1509929;1510062;1510271;1510380;1510557;1510477;1510729;1510671;1510902;1510952;1510931;1511141;1511299;1511270;151133…
156.329056202341;1508811;1508556;1508526;1508306;1508424;1508373;1508188;1508381;1508443;1508321;1508283;1508121;1508159;1507922;1508021;1508047;1507925;1507800;1507968;1507839;1508055;1508240;1508395;1508625;1508768;1509013;1509278;1509436;1509672;1509648;1509683;1509955;1509928;1509902;1509841;1510177;1510301;1510410;1510578;1510552;1510786;1510779;1510855;1510901;1511038;1511218;1511180;151123…
156.426632866096;1508823;1508678;1508435;1508248;1508458;1508206;1508270;1508298;1508345;1508429;1508300;1508097;1508230;1507863;1507976;1508110;1507982;1507757;1507940;1507976;1507935;1508250;1508238;1508566;1508763;1509110;1509091;1509403;1509514;1509583;1509789;1509865;1509936;1509876;1509867;1510075;1510236;1510425;1510395;1510507;1510597;1510782;1510784;1511057;1511027;1511111;1511409;151129…
156.524182069596;1508682;1508464;1508501;1508286;1508465;1508260;1508152;1508359;1508369;1508242;1508333;1508104;1508098;1508011;1507898;1508022;1507905;1507876;1508027;1507975;1507898;1508238;1508414;1508583;1508663;1509064;1509099;1509311;1509478;1509458;1509607;1509885;1509793;1509825;1509749;1509977;1510163;1510381;1510375;1510501;1510532;1510783;1510807;1510763;1511008;1511135;1511178;151112…
156.62170384132;1508709;1508635;1508435;1508298;1508474;1508338;1508183;1508242;1508459;1508302;1508268;1508143;1507888;1507906;1508021;1507987;1507829;1507853;1507805;1507865;1507887;1508267;1508393;1508601;1508705;1509087;1509208;1509426;1509474;1509453;1509595;1509759;1509873;1509729;1509909;1509994;1510193;1510372;1510322;1510527;1510570;1510713;1510768;1510945;1510976;1511196;1511179;1511260…
156.719198209745;1508710;1508610;1508398;1508265;1508393;1508238;1508134;1508302;1508387;1508423;1508238;1508047;1507980;1508014;1507930;1507816;1507814;1507683;1507856;1507773;1507882;1508068;1508253;1508488;1508782;1508989;1509128;1509324;1509409;1509501;1509625;1509788;1509740;1509816;1509904;1510052;1510198;1510331;1510444;1510497;1510567;1510741;1510841;1510840;1511027;1510998;1511231;151121…
156.816665203347;1508649;1508642;1508555;1508287;1508443;1508243;1508283;1508265;1508287;1508377;1508346;1508111;1508036;1507876;1507896;1508039;1507941;1507874;1507821;1507779;1507916;1508147;1508397;1508609;1508804;1509027;1509179;1509422;1509453;1509548;1509700;1509814;1509931;1509706;1509913;1509993;1510263;1510401;1510396;1510462;1510566;1510820;1510688;1510909;1511074;1510972;1511125;151132…
156.914104850606;1508660;1508522;1508482;1508131;1508367;1508144;1508140;1508238;1508312;1508378;1508206;1508027;1507887;1507852;1507842;1507721;1507791;1507748;1507859;1507731;1507811;1508171;1508238;1508464;1508648;1508971;1509060;1509220;1509446;1509317;1509435;1509620;1509762;1509674;1509720;1509978;1509992;1510217;1510246;1510423;1510467;1510853;1510744;1510725;1510998;1511003;1511064;151118…
157.011517179998;1508495;1508525;1508286;1508061;1508254;1508204;1508120;1508164;1508278;1508130;1508231;1508016;1507852;1507775;1507881;1507852;1507693;1507788;1507687;1507796;1507759;1508055;1508342;1508356;1508600;1509042;1509031;1509303;1509458;1509391;1509513;1509654;1509754;1509768;1509729;1509886;1510075;1510272;1510338;1510390;1510408;1510694;1510706;1510678;1510892;1510953;1510945;151108…
157.10890222;1508490;1508358;1508109;1508090;1508239;1508073;1507935;1508043;1508224;1508169;1508147;1507843;1507725;1507666;1507683;1507620;1507723;1507645;1507691;1507645;1507737;1508015;1508089;1508350;1508550;1508773;1508935;1509253;1509253;1509317;1509503;1509591;1509707;1509492;1509720;1509840;1510003;1510102;1510065;1510141;1510384;1510631;1510598;1510735;1510794;1510896;1510961;1510928;15…
157.20625999909;1508551;1508551;1508363;1508158;1508335;1508191;1508025;1508139;1508258;1508217;1508246;1507967;1507762;1507826;1507777;1507823;1507710;1507620;1507724;1507785;1507770;1508046;1508244;1508398;1508740;1508901;1508995;1509254;1509277;1509390;1509562;1509582;1509610;1509675;1509862;1509982;1510050;1510192;1510100;1510163;1510503;1510488;1510760;1510681;1511008;1510957;1511145;1511093…
157.303590545746;1508655;1508477;1508437;1508229;1508325;1508132;1508011;1508233;1508278;1508102;1508090;1508048;1507838;1507754;1507834;1507787;1507845;1507720;1507780;1507709;1507844;1508065;1508184;1508470;1508617;1508937;1509011;1509237;1509454;1509430;1509543;1509648;1509716;1509678;1509834;1509883;1510059;1510197;1510253;1510271;1510512;1510737;1510724;1510787;1510818;1510932;1511048;151112…
157.400893888444;1508687;1508696;1508478;1508344;1508333;1508333;1508350;1508302;1508476;1508252;1508236;1508070;1507933;1507927;1507839;1507906;1507809;1507819;1507947;1507929;1507919;1508172;1508418;1508596;1508792;1508984;1509105;1509451;1509563;1509457;1509545;1509905;1509970;1509903;1510004;1510056;1510312;1510344;1510497;1510498;1510529;1510814;1510783;1510967;1510953;1511081;1511238;151124…
157.498170055663;1508936;1508828;1508583;1508444;1508621;1508396;1508382;1508458;1508433;1508582;1508437;1508376;1508311;1508051;1508256;1508171;1508076;1508013;1508147;1508005;1508186;1508193;1508425;1508698;1509021;1509242;1509317;1509693;1509940;1509640;1509850;1509908;1510041;1509966;1510052;1510260;1510463;1510504;1510560;1510663;1510894;1510972;1510975;1510964;1511237;1511274;1511357;151139…
157.59541907588;1508641;1508595;1508412;1508218;1508477;1508329;1508190;1508359;1508395;1508360;1508231;1508116;1507971;1507875;1507993;1507853;1507825;1507740;1507932;1507867;1507884;1508207;1508426;1508562;1508692;1509157;1509038;1509398;1509550;1509512;1509628;1509747;1509832;1509895;1509853;1510199;1510268;1510366;1510465;1510481;1510425;1510811;1510795;1510980;1511074;1511112;1511193;1511259…
157.692640977572;1508620;1508562;1508443;1508263;1508413;1508275;1508220;1508279;1508362;1508382;1508297;1508099;1508043;1507759;1507810;1507985;1507872;1507843;1507815;1507952;1507974;1508318;1508403;1508615;1508783;1509100;1509185;1509328;1509490;1509578;1509611;1509915;1509789;1509847;1509918;1510071;1510301;1510376;1510535;1510492;1510549;1510740;1510864;1510898;1511047;1511088;1511113;151123…
157.789835789216;1508777;1508580;1508550;1508307;1508451;1508306;1508224;1508276;1508303;1508365;1508370;1508152;1508155;1507981;1507984;1507933;1507944;1507740;1507973;1507952;1508102;1508266;1508380;1508597;1509026;1509072;1509088;1509384;1509565;1509517;1509557;1509881;1509817;1509845;1509904;1510153;1510260;1510324;1510375;1510476;1510517;1510803;1510872;1510972;1511082;1511110;1511266;151132…
157.887003539291;1508736;1508569;1508292;1508352;1508467;1508273;1508214;1508273;1508256;1508364;1508219;1508109;1507864;1507843;1507824;1507838;1507727;1507734;1507906;1507870;1507900;1508002;1508268;1508514;1508747;1509056;1508954;1509286;1509459;1509518;1509604;1509792;1509742;1509850;1509768;1509984;1510246;1510285;1510436;1510485;1510564;1510634;1510826;1510939;1511021;1510879;1511077;151125…
157.984144256273;1508565;1508486;1508420;1508219;1508371;1508266;1508027;1508309;1508182;1508248;1508337;1508073;1507874;1507774;1507743;1507798;1507639;1507773;1507819;1507695;1507856;1508060;1508227;1508498;1508723;1508944;1509080;1509187;1509442;1509449;1509442;1509627;1509781;1509682;1509791;1509992;1510058;1510218;1510403;1510572;1510538;1510629;1510647;1510858;1511142;1510930;1511060;151113…
158.08125796864;1508533;1508478;1508377;1508282;1508372;1508239;1508114;1508231;1508222;1508300;1508193;1508060;1507896;1507696;1507799;1507908;1507773;1507806;1507858;1507769;1507871;1508159;1508240;1508589;1508827;1509026;1509155;1509371;1509437;1509391;1509627;1509616;1509669;1509892;1509748;1509906;1510154;1510252;1510242;1510510;1510528;1510663;1510669;1510751;1510977;1511168;1511007;1511230…
158.178344704869;1508807;1508640;1508462;1508474;1508560;1508380;1508292;1508413;1508314;1508380;1508353;1508058;1508094;1507852;1507943;1508109;1507805;1507779;1507929;1508015;1507864;1508219;1508433;1508592;1508855;1508993;1509156;1509401;1509560;1509581;1509572;1509966;1510008;1509851;1510029;1510124;1510383;1510328;1510438;1510470;1510631;1510814;1510823;1510934;1511196;1510789;1511264;151116…
158.275404493439;1508593;1508493;1508377;1508288;1508285;1508188;1508133;1508165;1508201;1508222;1508072;1508030;1507814;1507799;1507803;1507811;1507792;1507708;1507800;1507717;1507925;1508128;1508308;1508349;1508702;1508980;1509001;1509367;1509344;1509466;1509585;1509799;1509764;1509756;1509803;1509850;1510171;1510276;1510226;1510354;1510516;1510689;1510657;1510820;1510998;1511001;1511025;151109…
158.372437362825;1508563;1508450;1508314;1508198;1508387;1508112;1508059;1508072;1508242;1508188;1508167;1507943;1507862;1507713;1507783;1507857;1507655;1507713;1507872;1507708;1507808;1508031;1508101;1508465;1508650;1508920;1509059;1509321;1509444;1509429;1509505;1509675;1509745;1509776;1509752;1509948;1510069;1510255;1510335;1510363;1510433;1510591;1510707;1510796;1510862;1510931;1511155;151106…
158.469443341507;1508493;1508440;1508387;1508231;1508333;1508230;1507994;1508126;1508169;1508111;1508065;1507933;1507812;1507703;1507629;1507713;1507734;1507682;1507685;1507633;1507898;1507999;1508140;1508162;1508545;1508864;1508951;1509206;1509430;1509373;1509525;1509522;1509617;1509605;1509747;1509887;1510200;1510214;1510214;1510304;1510494;1510561;1510579;1510715;1510844;1510917;1511094;151111…
158.56642245796;1508414;1508332;1508241;1508072;1508225;1508061;1508100;1508121;1508225;1508212;1508092;1507817;1507698;1507610;1507660;1507685;1507589;1507567;1507641;1507658;1507735;1508081;1508202;1508474;1508567;1508821;1509051;1509059;1509184;1509339;1509405;1509622;1509547;1509716;1509567;1509886;1509965;1510293;1510128;1510176;1510410;1510694;1510585;1510803;1510769;1511009;1510900;1510906…
158.663374740663;1508400;1508252;1508206;1508096;1508295;1508050;1507929;1508013;1508110;1508199;1508026;1507838;1507703;1507713;1507670;1507680;1507652;1507587;1507681;1507532;1507668;1507910;1508081;1508158;1508538;1508793;1508903;1509106;1509245;1509317;1509283;1509515;1509621;1509658;1509656;1509826;1509894;1510104;1510073;1510168;1510522;1510620;1510523;1510715;1510844;1510842;1510947;151098…
158.760300218093;1508496;1508168;1508253;1507949;1508144;1507900;1507942;1507945;1507991;1507964;1508048;1507846;1507907;1507596;1507658;1507603;1507549;1507427;1507616;1507693;1507863;1507894;1508045;1508355;1508428;1508820;1508745;1509045;1509356;1509130;1509276;1509460;1509589;1509541;1509580;1509752;1509995;1510017;1510168;1510161;1510338;1510461;1510506;1510586;1510835;1510789;1510739;151107…
158.857198918728;1508543;1508400;1508314;1508093;1508364;1508126;1507977;1508011;1508124;1508172;1508088;1507869;1507785;1507823;1507764;1507580;1507646;1507514;1507645;1507574;1507668;1508079;1508146;1508234;1508636;1508804;1508884;1509102;1509233;1509282;1509414;1509570;1509559;1509654;1509605;1509799;1510067;1510133;1510067;1510408;1510374;1510612;1510589;1510691;1510784;1510871;1510920;151104…
158.954070871044;1508451;1508342;1508185;1508041;1508193;1507922;1507853;1507985;1508084;1508105;1507976;1507898;1507795;1507613;1507717;1507564;1507558;1507450;1507591;1507490;1507720;1507984;1508104;1508207;1508477;1508682;1508710;1509048;1509106;1509265;1509353;1509395;1509513;1509521;1509516;1509714;1509835;1509994;1510093;1510360;1510316;1510537;1510413;1510635;1510812;1510708;1510882;151086…
159.05091610352;1508509;1508458;1508242;1508196;1508331;1507997;1507944;1508057;1508234;1508100;1508030;1507816;1507864;1507686;1507671;1507770;1507599;1507547;1507668;1507860;1507639;1507954;1508111;1508341;1508488;1508905;1508942;1509320;1509286;1509312;1509423;1509594;1509651;1509678;1509629;1509857;1510056;1510151;1510291;1510258;1510272;1510613;1510596;1510817;1510952;1510847;1510915;1510945…
159.147734644633;1508364;1508351;1508223;1508074;1508217;1507954;1507944;1508062;1508086;1508145;1508144;1507979;1507743;1507721;1507731;1507686;1507686;1507566;1507688;1507562;1507857;1507961;1508231;1508083;1508585;1508812;1508953;1509050;1509338;1509348;1509390;1509627;1509612;1509560;1509581;1509770;1510023;1510040;1510143;1510272;1510371;1510536;1510496;1510567;1510861;1510964;1511000;151092…
159.24452652286;1508582;1508432;1508281;1508050;1508311;1508214;1508046;1507976;1508076;1508186;1508262;1507876;1507850;1507606;1507782;1507816;1507679;1507576;1507755;1507721;1507639;1507913;1508178;1508336;1508638;1508926;1508938;1509078;1509322;1509325;1509446;1509487;1509547;1509576;1509693;1509926;1510024;1510037;1510228;1510176;1510387;1510573;1510648;1510749;1510823;1510873;1510862;1511087…
159.341291766678;1508597;1508347;1508266;1508114;1508257;1508060;1508046;1508179;1508181;1508047;1508213;1507910;1507836;1507646;1507774;1507872;1507747;1507524;1507706;1507489;1507810;1507992;1508181;1508405;1508529;1508806;1509015;1509136;1509293;1509241;1509514;1509537;1509672;1509551;1509672;1509884;1510039;1510115;1510225;1510293;1510412;1510536;1510730;1510877;1510865;1510892;1510985;151108…
159.438030404566;1508410;1508266;1508160;1508054;1508224;1508029;1507914;1508033;1508094;1508172;1508044;1507810;1507837;1507694;1507684;1507757;1507697;1507611;1507835;1507710;1507579;1507973;1507986;1508368;1508469;1508783;1508936;1508942;1509364;1509251;1509314;1509564;1509676;1509551;1509560;1509879;1509971;1510120;1510165;1510211;1510404;1510473;1510517;1510545;1510732;1510909;1510999;151101…
159.534742465;1508302;1508133;1508092;1507925;1508061;1507761;1507708;1507900;1507956;1507859;1507849;1507747;1507546;1507508;1507547;1507488;1507445;1507385;1507472;1507446;1507641;1507800;1507864;1508224;1508250;1508611;1508545;1508915;1509199;1509176;1509182;1509188;1509346;1509394;1509394;1509755;1509734;1509908;1509815;1509976;1510129;1510306;1510382;1510485;1510615;1510676;1510775;1510701;1…
159.631427976458;1508359;1508183;1508123;1508069;1508101;1507895;1507837;1507921;1508016;1507868;1507986;1507698;1507740;1507627;1507548;1507574;1507642;1507579;1507629;1507561;1507717;1507920;1508044;1508278;1508436;1508777;1508925;1509071;1509279;1509141;1509311;1509500;1509436;1509624;1509599;1509815;1509913;1510040;1510017;1510144;1510227;1510450;1510417;1510610;1510762;1510777;1511024;151093…
159.728086967418;1508468;1508369;1508062;1507954;1508232;1507909;1507804;1507977;1507900;1508082;1507921;1507826;1507752;1507725;1507619;1507735;1507555;1507358;1507668;1507478;1507570;1507930;1508076;1508297;1508424;1508817;1508897;1509117;1509087;1509212;1509315;1509455;1509520;1509548;1509653;1509789;1509906;1510071;1510194;1510241;1510316;1510381;1510562;1510501;1510746;1510880;1510978;151075…
159.824719466356;1508432;1508300;1508143;1508049;1508165;1507996;1507850;1508054;1508034;1508138;1508046;1507750;1507677;1507759;1507754;1507533;1507576;1507599;1508046;1507556;1507638;1507934;1508082;1508296;1508581;1508864;1508894;1509054;1509256;1509161;1509245;1509490;1509519;1509663;1509486;1509737;1509899;1510108;1509933;1510108;1510397;1510559;1510530;1510593;1510813;1510796;1510860;151103…
159.921325501751;1508355;1508292;1508055;1507957;1508104;1507997;1507926;1507999;1508012;1508090;1507945;1507797;1507692;1507664;1507602;1507782;1507606;1507513;1507806;1507627;1507726;1507941;1508018;1508366;1508384;1508737;1508931;1509068;1509195;1509238;1509382;1509479;1509525;1509656;1509525;1509703;1509908;1510068;1509984;1510184;1510327;1510447;1510456;1510662;1510601;1510819;1510866;151087…
160.01790510208;1508266;1508197;1508167;1507897;1508141;1507981;1507813;1507818;1508008;1508040;1508010;1507718;1507805;1507628;1507559;1507605;1507370;1507386;1507611;1507654;1507663;1507864;1508000;1508116;1508445;1508624;1508748;1509015;1509193;1509194;1509205;1509343;1509469;1509492;1509616;1509714;1509797;1509983;1509946;1510044;1510260;1510416;1510390;1510524;1510630;1510754;1510864;1510806…
160.11445829582;1508484;1508325;1508225;1507929;1508257;1508029;1507916;1507910;1508020;1508083;1508034;1507822;1507749;1507682;1507619;1507689;1507630;1507514;1507538;1507559;1507647;1507876;1508041;1508264;1508483;1508853;1508856;1509018;1509323;1509249;1509315;1509555;1509669;1509470;1509710;1509684;1509866;1510118;1510063;1510165;1510330;1510451;1510575;1510545;1510681;1510771;1510864;1510938…
160.210985111448;1508501;1508286;1508203;1508179;1508230;1507977;1507883;1508045;1508158;1508278;1508167;1507857;1507809;1507765;1507713;1507715;1507723;1507734;1507616;1507782;1507612;1508013;1508229;1508444;1508669;1508895;1509020;1509313;1509212;1509274;1509454;1509504;1509538;1509627;1509676;1509971;1509942;1510103;1510318;1510324;1510529;1510531;1510635;1510650;1510941;1510891;1511052;151107…
160.307485577443;1508311;1508240;1508033;1507974;1508187;1508048;1507779;1507782;1508064;1507963;1507769;1507729;1507501;1507556;1507540;1507605;1507467;1507414;1507680;1507596;1507578;1507788;1508087;1508197;1508322;1508696;1508702;1508964;1509203;1509139;1509260;1509484;1509658;1509437;1509492;1509630;1509720;1509990;1510051;1510204;1510255;1510381;1510346;1510461;1510755;1510773;1510736;151076…
160.403959722281;1508553;1508314;1508238;1508071;1508313;1508193;1507816;1508121;1508115;1508247;1508100;1507995;1507839;1507699;1507730;1507733;1507729;1507507;1507854;1507748;1507821;1508003;1508166;1508429;1508573;1508843;1508976;1509310;1509448;1509347;1509416;1509653;1509422;1509617;1509515;1509895;1510146;1510214;1510295;1510225;1510413;1510603;1510596;1510693;1510789;1510885;1511074;151104…
160.50040757444;1508440;1508308;1508220;1508071;1508250;1508073;1508108;1508012;1508096;1508195;1508078;1507901;1507787;1507678;1507630;1507878;1507701;1507609;1507853;1507638;1507768;1508037;1508097;1508271;1508467;1508730;1508883;1509148;1509395;1509311;1509446;1509549;1509649;1509689;1509672;1509870;1509938;1510198;1510300;1510235;1510405;1510611;1510551;1510735;1510803;1510841;1510906;1511021…
160.596829162397;1508446;1508390;1508290;1508108;1508317;1508032;1507986;1508192;1508150;1508197;1507983;1507872;1507806;1507674;1507751;1507820;1507575;1507611;1507594;1507549;1507738;1508005;1508205;1508446;1508553;1508787;1508916;1509214;1509255;1509293;1509278;1509596;1509693;1509724;1509640;1509801;1509985;1510128;1510270;1510235;1510389;1510592;1510609;1510737;1510838;1510862;1510933;151110…
160.693224514631;1508398;1508299;1508155;1508131;1508267;1507986;1507939;1507869;1508064;1508070;1508017;1507715;1507689;1507498;1507674;1507719;1507612;1507506;1507606;1507499;1507536;1508077;1508127;1508279;1508443;1508690;1508864;1509085;1509269;1509206;1509345;1509656;1509503;1509608;1509690;1509764;1509853;1510013;1510122;1510073;1510361;1510473;1510573;1510522;1510713;1510860;1510838;151079…
160.789593659617;1508294;1508240;1508050;1508078;1507991;1507884;1507864;1507968;1507904;1507982;1507872;1507777;1507645;1507561;1507553;1507667;1507608;1507560;1507622;1507477;1507646;1507831;1508051;1508248;1508506;1508729;1508803;1509016;1509053;1509215;1509305;1509410;1509356;1509450;1509433;1509639;1509856;1509916;1509976;1510005;1510140;1510296;1510368;1510579;1510683;1510718;1510659;151090…
160.885936625835;1508502;1508411;1508225;1508107;1508411;1507905;1507925;1507981;1508068;1508190;1507968;1507918;1507854;1507664;1507756;1507851;1507679;1507675;1507750;1507713;1507762;1507953;1508116;1508326;1508608;1508857;1508904;1509252;1509380;1509312;1509412;1509593;1509568;1509635;1509873;1509848;1509945;1510192;1510153;1510270;1510511;1510584;1510531;1510734;1510877;1510927;1510890;151096…
160.98225344176;1508275;1508357;1508101;1507944;1508156;1507793;1507910;1507996;1507906;1507973;1507951;1507676;1507634;1507515;1507492;1507580;1507583;1507559;1507617;1507483;1507727;1507724;1508029;1508169;1508378;1508631;1508749;1509009;1509174;1509055;1509339;1509396;1509523;1509557;1509502;1509763;1509862;1510016;1510049;1510144;1510258;1510438;1510377;1510445;1510593;1510750;1510815;1510691…
161.078544135871;1508391;1508230;1508157;1507954;1508141;1507928;1507826;1507794;1507997;1508072;1507889;1507792;1507613;1507507;1507559;1507597;1507396;1507429;1507559;1507444;1507582;1507798;1507928;1508269;1508522;1508627;1508844;1508918;1509184;1509166;1509284;1509469;1509561;1509437;1509467;1509775;1509758;1510073;1509958;1510062;1510158;1510495;1510320;1510509;1510591;1510698;1510793;151069…
161.174808736645;1508353;1508230;1508289;1508113;1508217;1507973;1507882;1508106;1507954;1508033;1508096;1507867;1507842;1507639;1507764;1507753;1507531;1507586;1507675;1507600;1507653;1507854;1508131;1508390;1508504;1508716;1508958;1509202;1509287;1509196;1509456;1509496;1509520;1509537;1509590;1509861;1509984;1510127;1510056;1510262;1510328;1510467;1510480;1510602;1510772;1510792;1510905;151102…
161.27104727256;1508422;1508271;1508147;1507902;1508129;1507800;1507833;1507909;1507904;1508018;1507881;1507796;1507543;1507470;1507525;1507678;1507391;1507419;1507465;1507563;1507582;1507831;1508127;1508265;1508426;1508698;1508732;1508896;1509159;1509087;1509229;1509519;1509471;1509592;1509587;1509599;1509769;1509991;1510040;1510069;1510180;1510355;1510443;1510509;1510656;1510745;1510768;1510806…
161.367259772092;1508485;1508271;1508245;1507918;1508104;1507881;1507888;1508047;1507872;1508027;1508041;1507746;1507578;1507568;1507486;1507610;1507589;1507476;1507551;1507474;1507613;1507887;1508076;1508172;1508397;1508693;1508712;1509053;1509250;1509190;1509304;1509513;1509477;1509435;1509506;1509756;1509714;1509910;1510019;1510131;1510304;1510387;1510331;1510537;1510716;1510648;1510794;151086…
161.46344626372;1508243;1508027;1508027;1507840;1507998;1507913;1507819;1507799;1508075;1507795;1507979;1507685;1507483;1507488;1507588;1507528;1507505;1507374;1507525;1507514;1507562;1507706;1508061;1508138;1508434;1508582;1508774;1509020;1509181;1509082;1509408;1509373;1509417;1509409;1509340;1509746;1509711;1509932;1509935;1509973;1510248;1510294;1510317;1510354;1510687;1510765;1510837;1510852…
161.559606775921;1508500;1508243;1508056;1507977;1508079;1508030;1507782;1508047;1508055;1507927;1508064;1507789;1507551;1507481;1507625;1507585;1507586;1507472;1507494;1507550;1507485;1507776;1507965;1508184;1508525;1508772;1508751;1508972;1509149;1509262;1509201;1509297;1509460;1509500;1509434;1509661;1509819;1509911;1510051;1510119;1510200;1510466;1510353;1510538;1510628;1510817;1510727;151086…
161.655741337172;1508343;1508159;1507989;1507843;1508035;1507968;1507810;1507779;1507992;1507943;1507932;1507647;1507689;1507571;1507523;1507671;1507459;1507229;1507515;1507411;1507531;1507753;1508001;1508186;1508318;1508628;1508748;1508971;1509085;1509040;1509229;1509395;1509480;1509537;1509528;1509813;1509834;1509920;1510014;1510089;1510279;1510471;1510396;1510397;1510672;1510721;1510809;151079…
161.75184997595;1508233;1508169;1508115;1507850;1508039;1507941;1507767;1507838;1507887;1507827;1507802;1507680;1507482;1507631;1507357;1507506;1507415;1507285;1507521;1507523;1507636;1507716;1507993;1508010;1508341;1508538;1508749;1508926;1508961;1509038;1509101;1509437;1509345;1509370;1509524;1509738;1509737;1510042;1509920;1510062;1510172;1510280;1510329;1510403;1510378;1510605;1510698;1510661…
161.847932720734;1508093;1507971;1508071;1507903;1507924;1507766;1507713;1507900;1507814;1507835;1507814;1507752;1507489;1507260;1507493;1507611;1507387;1507346;1507486;1507393;1507485;1507627;1507955;1508059;1508352;1508614;1508660;1508912;1509074;1509054;1509285;1509259;1509382;1509381;1509376;1509540;1509738;1509925;1509995;1510009;1510155;1510277;1510295;1510427;1510403;1510616;1510682;151074…
161.9439896;1508273;1508071;1508001;1507935;1508174;1507961;1507755;1507959;1507903;1507950;1507791;1507833;1507520;1507584;1507526;1507644;1507537;1507568;1507519;1507427;1507542;1507788;1508103;1508165;1508335;1508632;1508676;1509142;1509147;1508939;1509243;1509440;1509452;1509567;1509621;1509600;1509880;1510013;1509822;1510124;1510206;1510385;1510419;1510491;1510671;1510657;1510797;1510812;151…
162.040020642226;1508314;1508158;1508083;1507934;1508131;1508084;1507875;1508030;1508009;1507960;1507969;1507864;1507795;1507434;1507603;1507580;1507574;1507490;1507618;1507399;1507611;1507723;1507999;1508136;1508514;1508718;1508783;1508963;1509127;1509186;1509243;1509396;1509499;1509397;1509512;1509659;1509880;1509978;1509991;1510114;1510187;1510433;1510507;1510601;1510509;1510755;1510798;151087…
162.13602587589;1508370;1508027;1508032;1507970;1508045;1507875;1507817;1508015;1507823;1507904;1507924;1507624;1507629;1507444;1507464;1507526;1507434;1507420;1507408;1507424;1507661;1507716;1507945;1508090;1508432;1508517;1508575;1508907;1509054;1509128;1509194;1509287;1509426;1509476;1509422;1509671;1509673;1509932;1510058;1510013;1510173;1510302;1510284;1510454;1510602;1510678;1510712;1510772…
162.232005329468;1508317;1508099;1508033;1507997;1508082;1507836;1507771;1507798;1507956;1507944;1507930;1507642;1507612;1507522;1507572;1507536;1507357;1507294;1507600;1507516;1507528;1507752;1508023;1508040;1508345;1508650;1508634;1508979;1509151;1509146;1509214;1509256;1509436;1509506;1509597;1509624;1509809;1509918;1510022;1510100;1510106;1510219;1510377;1510395;1510586;1510559;1510711;151075…
162.327959031439;1508432;1508249;1508167;1507947;1508133;1507908;1507973;1507963;1508043;1508076;1508020;1507920;1507661;1507690;1507548;1507604;1507564;1507548;1507658;1507567;1507552;1507904;1507953;1508194;1508471;1508780;1508851;1509095;1509223;1509303;1509393;1509510;1509488;1509525;1509551;1509703;1509940;1510060;1510055;1510229;1510304;1510469;1510396;1510576;1510718;1510813;1510923;151095…
162.42388701028;1508374;1508351;1508160;1508174;1508445;1508095;1508150;1508290;1508221;1508133;1508150;1507980;1507863;1507711;1507795;1507639;1507748;1507645;1507776;1507722;1507753;1508053;1508178;1508375;1508672;1508818;1509046;1509223;1509431;1509311;1509572;1509587;1509708;1509645;1509694;1509893;1509986;1510332;1510243;1510304;1510366;1510574;1510631;1510634;1510843;1510864;1510951;1511023…
162.519789294468;1508405;1508339;1508201;1508028;1508178;1508011;1507892;1508014;1508060;1508130;1507974;1507868;1507691;1507720;1507596;1507711;1507435;1507494;1507761;1507636;1507692;1508057;1508108;1508261;1508515;1508800;1508834;1508984;1509243;1509255;1509309;1509433;1509600;1509568;1509649;1509709;1509712;1509972;1510088;1510178;1510300;1510518;1510431;1510563;1510707;1510725;1510897;151091…
162.61566591248;1508370;1508224;1508074;1507998;1508123;1508002;1507870;1507974;1507955;1508071;1508075;1507728;1507633;1507610;1507561;1507561;1507573;1507342;1507503;1507592;1507618;1507860;1508115;1508265;1508483;1508690;1508911;1508936;1509160;1509357;1509314;1509532;1509566;1509529;1509539;1509676;1509845;1510007;1510114;1510089;1510220;1510415;1510461;1510562;1510664;1510717;1510877;1510929…
162.711516892795;1508302;1508169;1508153;1507912;1508118;1508017;1507781;1508015;1507942;1508034;1508021;1507887;1507559;1507535;1507578;1507675;1507593;1507466;1507553;1507498;1507613;1507815;1508025;1508150;1508511;1508844;1508902;1508991;1509336;1509113;1509226;1509412;1509528;1509515;1509658;1509702;1509868;1509891;1509850;1510089;1510236;1510349;1510406;1510387;1510825;1510707;1510868;151084…
162.807342263889;1508251;1508275;1508299;1507931;1508081;1507842;1507837;1508017;1507991;1508000;1507885;1507879;1507634;1507521;1507503;1507595;1507380;1507478;1507535;1507555;1507499;1507823;1508035;1508141;1508436;1508704;1508637;1509023;1509109;1509102;1509189;1509322;1509450;1509384;1509469;1509710;1509665;1509922;1510076;1510088;1510188;1510364;1510395;1510565;1510651;1510725;1510687;151090…
162.90314205424;1508297;1508150;1508153;1507864;1508195;1507860;1507709;1508031;1507962;1507983;1507899;1507809;1507682;1507544;1507643;1507618;1507592;1507400;1507502;1507599;1507615;1507891;1508057;1508168;1508354;1508720;1508798;1509115;1509164;1509237;1509221;1509555;1509587;1509431;1509556;1509625;1509764;1510037;1509976;1510164;1510363;1510503;1510464;1510589;1510646;1510707;1510781;1510871…
162.998916292325;1508259;1508248;1508230;1508029;1508071;1507866;1507862;1508076;1507940;1508170;1507998;1507668;1507660;1507513;1507740;1507534;1507465;1507354;1507686;1507589;1507659;1507669;1508023;1508240;1508521;1508708;1508803;1509021;1509224;1509224;1509402;1509454;1509503;1509374;1509608;1509606;1509878;1509938;1509971;1510176;1510297;1510365;1510324;1510451;1510591;1510754;1510919;151083…
163.094665006623;1508285;1508419;1508218;1508045;1508198;1507974;1507853;1508091;1508019;1508154;1507975;1507729;1507706;1507584;1507608;1507632;1507599;1507445;1507580;1507594;1507655;1507951;1508018;1508387;1508385;1508704;1508833;1509191;1509182;1509252;1509433;1509498;1509442;1509504;1509549;1509790;1510011;1510113;1510192;1510184;1510257;1510348;1510527;1510531;1510677;1510788;1510837;151086…
163.190388225609;1508480;1508318;1508352;1507992;1508136;1507984;1507959;1507949;1508025;1508003;1507970;1507821;1507546;1507705;1507580;1507730;1507563;1507396;1507654;1507546;1507669;1507889;1508042;1508166;1508407;1508818;1508756;1509080;1509243;1509122;1509379;1509471;1509588;1509446;1509596;1509711;1509853;1510037;1509988;1510192;1510307;1510541;1510540;1510610;1510866;1510793;1510901;151094…
163.286085977763;1508208;1508170;1508133;1507950;1508068;1507908;1507848;1508014;1508078;1508023;1507988;1507668;1507628;1507581;1507609;1507661;1507521;1507396;1507559;1507483;1507543;1507772;1507975;1508168;1508307;1508677;1508711;1508940;1509031;1509219;1509361;1509477;1509487;1509534;1509452;1509588;1509844;1509942;1510135;1510092;1510213;1510363;1510328;1510527;1510712;1510733;1510870;151085…
163.38175829156;1508436;1508323;1508286;1507998;1508153;1507928;1507867;1508073;1507962;1508182;1508077;1507767;1507694;1507687;1507640;1507635;1507568;1507536;1507699;1507711;1507636;1507856;1507989;1508237;1508509;1508791;1508772;1509126;1509353;1509305;1509334;1509599;1509581;1509545;1509669;1509903;1510027;1510283;1510173;1510278;1510396;1510426;1510465;1510563;1510899;1510852;1510914;1511014…
163.477405195479;1508460;1508433;1508263;1508049;1508203;1508013;1508026;1508093;1508188;1508147;1508064;1507851;1507896;1507684;1507627;1507758;1507601;1507593;1507661;1507710;1507656;1508019;1508045;1508367;1508613;1508851;1508988;1509208;1509378;1509264;1509381;1509539;1509614;1509635;1509702;1510030;1510045;1510160;1510232;1510326;1510401;1510610;1510450;1510679;1510801;1510832;1510901;151103…
163.573026717997;1508399;1508421;1508278;1507978;1508342;1508027;1507871;1508207;1508138;1508031;1507903;1507899;1507721;1507625;1507642;1507775;1507598;1507449;1507748;1507607;1507634;1508028;1508108;1508362;1508505;1508837;1508963;1509126;1509271;1509204;1509397;1509596;1509550;1509587;1509715;1509787;1510043;1510107;1510023;1510150;1510310;1510678;1510480;1510638;1510752;1510676;1510971;151099…
163.668622887592;1508487;1508470;1508347;1508123;1508289;1508160;1508001;1508100;1508098;1508142;1508128;1507894;1507812;1507737;1507750;1507710;1507642;1507647;1507725;1507670;1507822;1508045;1508202;1508403;1508689;1508891;1508977;1509239;1509325;1509270;1509332;1509730;1509694;1509705;1509658;1509890;1509986;1510144;1510112;1510225;1510437;1510547;1510701;1510731;1510838;1510702;1511078;151107…
163.76419373274;1508457;1508380;1508260;1508096;1508430;1507963;1507779;1508061;1508022;1508164;1507971;1507751;1507775;1507782;1507551;1507717;1507560;1507539;1507697;1507561;1507723;1507890;1508068;1508511;1508464;1508866;1508892;1509229;1509211;1509223;1509304;1509537;1509580;1509662;1509526;1509656;1509833;1510053;1510039;1510156;1510380;1510615;1510554;1510602;1510706;1510791;1510979;1511022…
163.85973928192;1508308;1508206;1508141;1508002;1508201;1507958;1507819;1508059;1507991;1508018;1507970;1507884;1507640;1507693;1507711;1507598;1507521;1507439;1507652;1507589;1507691;1507900;1508113;1508098;1508474;1508699;1508845;1509056;1509218;1509197;1509239;1509515;1509559;1509620;1509668;1509811;1509795;1510052;1510081;1510072;1510265;1510455;1510469;1510437;1510755;1510805;1510916;1510975…
163.955259563609;1508418;1508291;1508203;1507991;1508106;1508186;1507952;1507983;1508039;1508117;1508012;1507660;1507676;1507563;1507591;1507672;1507476;1507483;1507581;1507770;1507624;1507882;1508074;1508320;1508397;1508661;1508690;1509260;1509247;1509228;1509313;1509483;1509605;1509436;1509585;1509659;1509845;1509957;1510151;1510164;1510335;1510501;1510500;1510441;1510763;1510803;1510794;151091…
164.050754606284;1508442;1508319;1508087;1508099;1508238;1508026;1507958;1508005;1507919;1508196;1508053;1507840;1507810;1507712;1507749;1507738;1507697;1507539;1507703;1507713;1507743;1507953;1508209;1508161;1508604;1508724;1508940;1509222;1509371;1509220;1509434;1509597;1509656;1509514;1509631;1509921;1509927;1510112;1510078;1510285;1510391;1510536;1510531;1510617;1510738;1510708;1511106;151092…
164.146224438422;1508267;1508165;1508083;1508019;1508150;1507930;1507764;1508046;1508066;1508034;1507920;1507865;1507734;1507562;1507660;1507757;1507492;1507551;1507712;1507498;1507584;1507842;1508036;1508088;1508384;1508785;1508744;1508968;1509280;1509251;1509286;1509482;1509507;1509455;1509561;1509781;1509883;1510070;1510092;1510088;1510236;1510421;1510482;1510549;1510691;1510666;1510807;151084…
164.241669088502;1508347;1508109;1508131;1508124;1508111;1507995;1507858;1507871;1508013;1508109;1508019;1507701;1507690;1507482;1507625;1507671;1507459;1507416;1507558;1507548;1507507;1507990;1507999;1508255;1508451;1508864;1508886;1509009;1509201;1509231;1509203;1509477;1509454;1509536;1509663;1509774;1509905;1510068;1510101;1510083;1510239;1510511;1510385;1510591;1510669;1510709;1510777;151083…
164.337088585;1508570;1508494;1508324;1508292;1508303;1508203;1508051;1508190;1508342;1508082;1508222;1507924;1507871;1507858;1507648;1507801;1507772;1507599;1507818;1507739;1507708;1508041;1508230;1508355;1508680;1508959;1508957;1509339;1509421;1509357;1509460;1509688;1509734;1509659;1509799;1509909;1509978;1510092;1510161;1510382;1510412;1510579;1510583;1510701;1510799;1510997;1511069;1511175;1…
164.432482956394;1508566;1508409;1508439;1508297;1508340;1508216;1508135;1508235;1508239;1508278;1508205;1508070;1507934;1507819;1507762;1507854;1507827;1507598;1507798;1507765;1507857;1508028;1508300;1508502;1508614;1508913;1509090;1509232;1509471;1509476;1509584;1509726;1509680;1509712;1509812;1509940;1510089;1510211;1510278;1510329;1510570;1510721;1510561;1510948;1510918;1511025;1511097;151112…
164.527852231162;1508352;1508398;1508126;1508135;1508258;1508161;1507829;1508158;1508004;1508213;1508082;1507865;1507766;1507663;1507616;1507726;1507632;1507659;1507650;1507692;1507685;1507957;1508256;1508319;1508610;1508854;1508865;1509265;1509329;1509222;1509419;1509595;1509585;1509553;1509686;1509909;1509905;1510216;1510181;1510217;1510312;1510555;1510580;1510730;1510822;1510714;1510882;151099…
164.62319643778;1508416;1508287;1508201;1507853;1508350;1507958;1507793;1508125;1508079;1508136;1508079;1507739;1507786;1507619;1507667;1507731;1507734;1507574;1507762;1507783;1507695;1507942;1508160;1508291;1508529;1508794;1508836;1509062;1509336;1509370;1509334;1509579;1509594;1509679;1509606;1509841;1510002;1510137;1510094;1510202;1510274;1510533;1510616;1510625;1510837;1510803;1510867;1510954…
164.718515604727;1508474;1508492;1508326;1508176;1508335;1508184;1508002;1508230;1508235;1508183;1508088;1507914;1507845;1507765;1507785;1507901;1507825;1507674;1507805;1507854;1507906;1508105;1508184;1508472;1508544;1508944;1509030;1509230;1509490;1509496;1509591;1509773;1509707;1509700;1509785;1510017;1510098;1510348;1510319;1510424;1510437;1510537;1510625;1510842;1510967;1511002;1511192;151104…
164.81380976048;1508487;1508463;1508284;1508186;1508196;1508166;1508059;1508173;1508113;1508152;1508056;1508039;1507871;1507706;1507749;1507696;1507834;1507732;1507720;1507582;1507713;1508044;1508261;1508338;1508491;1508984;1508975;1509294;1509373;1509260;1509310;1509561;1509661;1509637;1509713;1509850;1510067;1510189;1510217;1510407;1510407;1510562;1510565;1510740;1510814;1510929;1511014;1510922…
164.909078933516;1508582;1508495;1508446;1508344;1508368;1508116;1508142;1508210;1508281;1508369;1508350;1508009;1507920;1507780;1507783;1507786;1507762;1507709;1507779;1507833;1507821;1508150;1508371;1508586;1508698;1509052;1509042;1509117;1509528;1509361;1509571;1509742;1509755;1509612;1509812;1509946;1510138;1510143;1510267;1510342;1510488;1510591;1510708;1510777;1510832;1511094;1511017;151106…
165.004323152312;1508514;1508444;1508285;1507975;1508260;1508071;1508108;1508076;1508205;1508012;1508106;1507861;1507849;1507723;1507685;1507694;1507625;1507654;1507652;1507682;1507732;1507996;1508131;1508312;1508473;1508821;1508866;1509146;1509197;1509295;1509320;1509620;1509565;1509576;1509644;1509965;1509952;1510224;1510188;1510224;1510388;1510470;1510527;1510732;1510942;1510722;1510928;151097…
165.099542445347;1508663;1508401;1508484;1508030;1508403;1508304;1508051;1508212;1508435;1508274;1508298;1507966;1507939;1507898;1507746;1507912;1507743;1507741;1507788;1507822;1507838;1508091;1508310;1508513;1508766;1509013;1509028;1509353;1509454;1509552;1509447;1509685;1509887;1509771;1509808;1509989;1510071;1510308;1510428;1510390;1510560;1510670;1510733;1510819;1510897;1510987;1511152;151111…
165.194736841097;1508527;1508478;1508306;1508276;1508271;1508112;1508178;1508225;1508289;1508261;1508219;1507922;1507796;1507885;1507785;1507865;1507780;1507789;1507818;1507719;1507836;1508116;1508267;1508282;1508637;1508900;1509085;1509250;1509453;1509436;1509614;1509829;1509754;1509741;1509705;1509971;1510234;1510196;1510228;1510493;1510518;1510779;1510679;1510907;1510904;1511082;1511194;151106…
165.28990636804;1508526;1508454;1508279;1508132;1508301;1508162;1507909;1508119;1508150;1508012;1508088;1507833;1507841;1507615;1507686;1507804;1507831;1507633;1507644;1507672;1507763;1507946;1508194;1508419;1508611;1508832;1508987;1509306;1509350;1509426;1509316;1509548;1509720;1509650;1509563;1509932;1509939;1510155;1510171;1510266;1510443;1510570;1510565;1510638;1510929;1510923;1511071;1510978…
165.385051054653;1508522;1508472;1508361;1508194;1508408;1508247;1508075;1508031;1508269;1508214;1508243;1508000;1507795;1507793;1507760;1507820;1507740;1507611;1507838;1507831;1507808;1508119;1508289;1508469;1508609;1508910;1508901;1509138;1509410;1509423;1509420;1509625;1509758;1509763;1509778;1509839;1510057;1510194;1510337;1510253;1510566;1510649;1510710;1510791;1510863;1511020;1511053;151100…
165.480170929415;1508441;1508434;1508444;1508129;1508354;1508251;1508206;1508124;1508122;1508186;1508261;1507941;1507826;1507781;1507704;1507828;1507697;1507624;1507681;1507678;1507886;1508063;1508258;1508422;1508583;1508841;1509038;1509278;1509512;1509329;1509603;1509822;1509730;1509702;1509845;1509932;1510117;1510197;1510244;1510329;1510515;1510609;1510531;1510731;1510888;1510982;1510994;151117…
165.575266020801;1508489;1508430;1508398;1508031;1508323;1508123;1508063;1508089;1508104;1508172;1508171;1507975;1507903;1507655;1507739;1507641;1507604;1507631;1507726;1507638;1507752;1507932;1508203;1508330;1508663;1508964;1509028;1509226;1509368;1509311;1509424;1509656;1509693;1509760;1509613;1509984;1509973;1510146;1510330;1510417;1510388;1510723;1510634;1510650;1510807;1510947;1510969;151115…
165.670336357291;1508504;1508391;1508263;1508040;1508327;1508105;1508028;1508124;1508114;1508192;1508132;1507933;1507834;1507673;1507627;1507714;1507694;1507602;1507724;1507757;1507820;1507938;1508245;1508338;1508575;1508882;1508933;1509230;1509304;1509303;1509521;1509545;1509580;1509536;1509531;1509794;1510079;1510061;1510226;1510275;1510440;1510656;1510604;1510649;1510793;1510819;1511074;151111…
165.76538196736;1508487;1508431;1508253;1508077;1508367;1508253;1508053;1508085;1508193;1508266;1508061;1508001;1507855;1507684;1507789;1507838;1507752;1507601;1507703;1507706;1507833;1508056;1508189;1508341;1508658;1508901;1509075;1509149;1509394;1509412;1509433;1509601;1509686;1509581;1509775;1509887;1510058;1510085;1510192;1510423;1510418;1510654;1510625;1510733;1510891;1510979;1511039;1511015…
165.860402879487;1508604;1508583;1508403;1508171;1508380;1508200;1508115;1508256;1508302;1508273;1508268;1507979;1507921;1507693;1507914;1507854;1507717;1507731;1507723;1507904;1507867;1508142;1508308;1508507;1508626;1508881;1509109;1509297;1509473;1509350;1509576;1509749;1509932;1509615;1510021;1510011;1510173;1510286;1510295;1510313;1510568;1510660;1510678;1510715;1510973;1510964;1511068;151106…
165.955399122149;1508716;1508455;1508353;1508314;1508306;1508220;1508065;1508294;1508190;1508295;1508211;1508059;1507987;1507782;1507843;1507854;1507785;1507637;1507912;1507696;1507927;1508194;1508237;1508447;1508795;1508921;1509116;1509385;1509394;1509401;1509532;1509795;1509663;1509751;1509750;1509961;1510115;1510256;1510177;1510460;1510440;1510494;1510739;1510797;1510978;1511006;1511085;151111…
166.050370723824;1508640;1508527;1508461;1508298;1508414;1508277;1508162;1508286;1508476;1508421;1508263;1508136;1508056;1507884;1507897;1507856;1507971;1507810;1507826;1507876;1507956;1508164;1508372;1508608;1508613;1509070;1509085;1509381;1509561;1509400;1509663;1509879;1509750;1509731;1509811;1510068;1510221;1510236;1510373;1510532;1510620;1510808;1510917;1510884;1511046;1511208;1511201;151111…
166.145317712988;1508578;1508341;1508282;1508322;1508296;1508158;1508067;1508129;1508326;1508310;1508175;1508038;1507803;1507744;1507781;1507946;1507768;1507668;1507825;1507848;1507955;1508021;1508269;1508417;1508546;1508978;1508959;1509351;1509573;1509288;1509669;1509608;1509744;1509820;1509656;1509956;1510076;1510272;1510112;1510378;1510430;1510780;1510670;1510718;1510807;1510996;1511015;151108…
166.24024011812;1508525;1508478;1508378;1508225;1508421;1508289;1508167;1508383;1508180;1508342;1508304;1508132;1507966;1507849;1507841;1507915;1507837;1507666;1507769;1507816;1507847;1508114;1508319;1508352;1508758;1509047;1508980;1509293;1509612;1509493;1509532;1509762;1509792;1509831;1509746;1509992;1510235;1510226;1510315;1510456;1510431;1510781;1510731;1510730;1510898;1511028;1511135;1511101…
166.335137967697;1508600;1508576;1508310;1508309;1508369;1508195;1508245;1508234;1508329;1508383;1508171;1508044;1507964;1507743;1508034;1507995;1507845;1507728;1507913;1507734;1508077;1508155;1508170;1508533;1508679;1509036;1509009;1509456;1509494;1509536;1509554;1509733;1509751;1509791;1509866;1510081;1510262;1510339;1510330;1510425;1510645;1510663;1510893;1510831;1510987;1511039;1511064;151126…
166.430011290196;1508820;1508658;1508507;1508492;1508531;1508300;1508318;1508369;1508484;1508404;1508296;1508195;1507995;1508081;1508038;1508102;1507963;1507856;1508038;1507951;1507992;1508213;1508385;1508597;1508995;1509155;1509129;1509396;1509569;1509594;1509707;1509892;1509915;1509959;1509974;1510268;1510244;1510374;1510565;1510380;1510655;1510903;1510804;1510965;1511165;1511135;1511176;151103…
166.524860114094;1508667;1508453;1508425;1508178;1508372;1508206;1508186;1508218;1508328;1508317;1508276;1508088;1507865;1507926;1507910;1508109;1507893;1507717;1507890;1507898;1507951;1508151;1508279;1508489;1508788;1509046;1509096;1509295;1509485;1509467;1509573;1509691;1509820;1509735;1509927;1510059;1510127;1510365;1510352;1510487;1510537;1510732;1510740;1510814;1511094;1511062;1511144;151114…
166.61968446787;1508609;1508551;1508515;1508310;1508476;1508310;1508393;1508430;1508419;1508351;1508372;1508055;1507932;1507996;1508009;1507924;1507890;1507792;1507918;1507945;1507950;1508339;1508383;1508607;1508779;1509067;1509214;1509393;1509534;1509643;1509666;1509781;1509944;1509918;1509781;1510078;1510225;1510451;1510384;1510679;1510591;1510799;1510857;1510942;1511057;1511096;1511265;1511278…
166.71448438;1508600;1508511;1508336;1508157;1508401;1508204;1508092;1508188;1508202;1508338;1508199;1508009;1507913;1507812;1507838;1507986;1507771;1507697;1507805;1507815;1507807;1508097;1508212;1508619;1508765;1508971;1509029;1509180;1509546;1509497;1509494;1509688;1509771;1509841;1509788;1509937;1510092;1510190;1510438;1510393;1510485;1510658;1510856;1510777;1511021;1511004;1511036;1511169;15…
166.809259878962;1508689;1508565;1508665;1508376;1508544;1508381;1508339;1508419;1508420;1508446;1508330;1508228;1507970;1507940;1507987;1508122;1507998;1507857;1507967;1507968;1508047;1508140;1508422;1508609;1508816;1509112;1509186;1509518;1509647;1509546;1509707;1509952;1509952;1510002;1510051;1510061;1510315;1510463;1510451;1510427;1510768;1510654;1510889;1510894;1511182;1511178;1511239;151118…
166.904010993234;1508886;1508683;1508662;1508445;1508785;1508584;1508304;1508440;1508437;1508422;1508558;1508222;1508303;1508117;1508160;1508282;1508081;1507990;1508089;1507992;1508180;1508426;1508532;1508793;1508839;1509308;1509357;1509606;1509759;1509790;1509869;1510002;1510099;1510138;1510243;1510252;1510237;1510700;1510625;1510723;1510891;1510944;1511048;1511087;1511110;1511289;1511376;151140…
166.998737751292;1508880;1508799;1508630;1508527;1508727;1508556;1508445;1508539;1508518;1508563;1508577;1508150;1508160;1508080;1508094;1508082;1507995;1508034;1508132;1508136;1508093;1508456;1508661;1508786;1508943;1509386;1509319;1509596;1509630;1509708;1509836;1510053;1510074;1510083;1510205;1510150;1510390;1510566;1510660;1510789;1510877;1511118;1510999;1511107;1511354;1511297;1511339;151147…
167.093440181615;1508805;1508626;1508676;1508229;1508613;1508326;1508251;1508502;1508469;1508467;1508454;1508173;1508098;1508012;1507990;1508070;1507982;1507892;1507995;1507971;1507949;1508301;1508506;1508704;1508975;1509187;1509288;1509462;1509598;1509667;1509715;1509988;1509836;1509887;1510080;1510136;1510223;1510420;1510483;1510571;1510746;1510891;1510802;1511029;1511084;1511210;1511235;151119…
167.18811831268;1508683;1508698;1508559;1508424;1508541;1508300;1508207;1508334;1508416;1508377;1508296;1508195;1508080;1507883;1507807;1508051;1507919;1507775;1508075;1507955;1508065;1508240;1508492;1508635;1508855;1509231;1509267;1509408;1509516;1509570;1509736;1509926;1510003;1509909;1510014;1510129;1510314;1510439;1510405;1510599;1510661;1510825;1510853;1510941;1511185;1511208;1511239;1511300…
167.282772172964;1508755;1508685;1508539;1508357;1508488;1508497;1508193;1508375;1508410;1508455;1508311;1508164;1507975;1508016;1508038;1508112;1507929;1507851;1507995;1508037;1508079;1508321;1508499;1508711;1508847;1509284;1509354;1509484;1509683;1509685;1509821;1510022;1509973;1509963;1510098;1510260;1510393;1510381;1510548;1510443;1510764;1510807;1510920;1510948;1511054;1511273;1511227;151120…
167.377401790944;1508844;1508845;1508653;1508509;1508826;1508412;1508478;1508553;1508500;1508565;1508490;1508439;1508249;1508148;1508177;1508270;1508053;1508064;1508163;1508158;1508204;1508533;1508658;1508859;1509011;1509265;1509356;1509475;1509744;1509781;1509851;1510013;1509979;1510118;1510075;1510423;1510388;1510607;1510600;1510805;1510739;1511074;1511121;1511087;1511309;1511315;1511389;151150…
167.472007195099;1508796;1508636;1508479;1508330;1508416;1508368;1508188;1508404;1508428;1508444;1508347;1508193;1508045;1507913;1508020;1508110;1507910;1507834;1508112;1508029;1507960;1508320;1508398;1508645;1508881;1509103;1509214;1509450;1509684;1509703;1509700;1509818;1509911;1509950;1509958;1510198;1510216;1510374;1510461;1510640;1510630;1510848;1510965;1510965;1511156;1511222;1511303;151120…
167.566588413905;1508738;1508677;1508559;1508475;1508738;1508161;1508263;1508430;1508393;1508419;1508455;1508199;1508149;1507959;1507912;1507931;1507853;1508062;1507985;1507998;1507922;1508430;1508456;1508606;1508939;1509043;1509235;1509481;1509636;1509649;1509674;1509802;1510033;1510103;1509973;1510081;1510443;1510390;1510456;1510547;1510689;1510928;1510890;1511039;1511138;1511164;1511328;151132…
167.66114547584;1508582;1508569;1508417;1508359;1508478;1508264;1508190;1508237;1508258;1508329;1508385;1508184;1507992;1507768;1507982;1507949;1507930;1507773;1507865;1507904;1507845;1508302;1508235;1508593;1508750;1509090;1509175;1509344;1509453;1509422;1509550;1509807;1509896;1509893;1509948;1510015;1510097;1510275;1510266;1510481;1510693;1510718;1510790;1510873;1511072;1510921;1511133;1511261…
167.755678409381;1508804;1508724;1508567;1508494;1508592;1508451;1508285;1508304;1508420;1508536;1508399;1508206;1508112;1507893;1508075;1508065;1507938;1507872;1508008;1508063;1508069;1508390;1508609;1508721;1508886;1509234;1509371;1509400;1509710;1509621;1509746;1509993;1509952;1509922;1509988;1510227;1510310;1510475;1510473;1510629;1510737;1510862;1510907;1511075;1511226;1511252;1511246;151142…
167.850187243007;1508614;1508586;1508490;1508348;1508546;1508392;1508195;1508340;1508334;1508494;1508434;1508163;1508128;1507978;1507937;1507988;1507939;1507809;1507951;1507966;1508053;1508211;1508547;1508532;1508822;1509169;1509131;1509466;1509612;1509574;1509779;1509914;1509826;1509935;1509941;1510050;1510247;1510472;1510526;1510543;1510745;1510818;1510953;1510875;1511203;1511194;1511154;151130…
167.944672005193;1508905;1508699;1508596;1508349;1508716;1508455;1508407;1508434;1508576;1508415;1508664;1508257;1508132;1508130;1508045;1508079;1507958;1507829;1508129;1508054;1508067;1508383;1508578;1508749;1508998;1509157;1509393;1509430;1509803;1509639;1509876;1509941;1510086;1510026;1510116;1510163;1510362;1510516;1510559;1510660;1510729;1510804;1511001;1510993;1511197;1511276;1511345;151135…
168.039132724419;1508909;1508788;1508636;1508519;1508604;1508520;1508440;1508573;1508486;1508550;1508639;1508340;1508204;1507996;1508109;1508116;1508041;1508046;1508128;1508130;1508132;1508430;1508553;1508675;1509009;1509310;1509311;1509661;1509755;1509698;1509841;1510011;1510084;1510112;1510106;1510324;1510428;1510551;1510678;1510774;1510813;1510948;1511026;1511114;1511275;1511303;1511371;151144…
168.13356942916;1509046;1508954;1508703;1508618;1508766;1508636;1508433;1508549;1508724;1508673;1508515;1508473;1508331;1508199;1508276;1508247;1508225;1508276;1508284;1508092;1508312;1508617;1508632;1508847;1509080;1509449;1509577;1509786;1509847;1509925;1509900;1510085;1510157;1510256;1510338;1510372;1510431;1510753;1510636;1510920;1510882;1511043;1511144;1511271;1511445;1511338;1511599;1511529…
168.227982147895;1508936;1508863;1508515;1508510;1508878;1508597;1508409;1508565;1508513;1508574;1508570;1508389;1508287;1508158;1508119;1508081;1508230;1508163;1508052;1508176;1508281;1508448;1508613;1508790;1508952;1509348;1509424;1509532;1509896;1509706;1509889;1510008;1510091;1510078;1510178;1510197;1510496;1510601;1510681;1510768;1510803;1511079;1511134;1511206;1511249;1511365;1511454;151150…
168.322370909101;1508784;1508725;1508652;1508458;1508657;1508399;1508278;1508427;1508495;1508497;1508497;1508298;1508210;1508076;1508017;1508182;1508005;1508014;1508024;1508039;1508089;1508466;1508416;1508767;1508974;1509170;1509252;1509535;1509711;1509728;1509841;1510005;1509977;1510010;1510011;1510145;1510400;1510556;1510510;1510558;1510690;1511003;1510881;1511173;1511307;1511097;1511323;151143…
168.416735741256;1508881;1508856;1508672;1508527;1508660;1508533;1508446;1508440;1508634;1508544;1508452;1508365;1508136;1508193;1508185;1508133;1507993;1507990;1508140;1508111;1508369;1508446;1508667;1508886;1508981;1509248;1509441;1509505;1509759;1509700;1509909;1509970;1509969;1510090;1510126;1510344;1510313;1510626;1510594;1510752;1510756;1511043;1511017;1511095;1511269;1511161;1511445;151154…
168.511076672836;1508940;1508841;1508601;1508530;1508734;1508593;1508445;1508597;1508568;1508559;1508557;1508385;1508150;1508098;1508214;1508148;1508114;1508015;1508139;1508128;1508250;1508513;1508708;1508729;1509054;1509264;1509441;1509689;1509720;1509748;1509907;1509985;1510170;1510044;1510145;1510212;1510458;1510667;1510625;1510765;1510876;1510965;1510969;1511157;1511259;1511285;1511495;151155…
168.60539373232;1508832;1508748;1508579;1508524;1508711;1508391;1508225;1508554;1508527;1508496;1508468;1508321;1508182;1508220;1508237;1508032;1507988;1507939;1508197;1508117;1508044;1508436;1508591;1508741;1508918;1509280;1509298;1509715;1509745;1509720;1509786;1509923;1510009;1510060;1510088;1510259;1510476;1510521;1510574;1510673;1510902;1510966;1510931;1511073;1511112;1511227;1511446;1511407…
168.699686948185;1508903;1508763;1508659;1508547;1508668;1508494;1508441;1508526;1508657;1508640;1508327;1508423;1508282;1508144;1508123;1508197;1508061;1507984;1508027;1508138;1508272;1508511;1508645;1508911;1509044;1509329;1509446;1509604;1509705;1509706;1509980;1510138;1510196;1510176;1510141;1510303;1510495;1510679;1510693;1510795;1510847;1511005;1510956;1511081;1511214;1511308;1511499;151141…
168.793956348908;1508978;1508801;1508688;1508461;1508666;1508436;1508400;1508470;1508432;1508475;1508436;1508197;1508330;1508137;1508153;1508302;1508041;1508002;1508172;1508143;1508163;1508370;1508522;1508853;1509041;1509326;1509290;1509609;1509768;1509778;1509686;1510054;1510130;1509972;1510173;1510405;1510420;1510588;1510506;1510631;1510844;1510964;1510994;1511129;1511271;1511394;1511454;151133…
168.888201962966;1508959;1508825;1508738;1508546;1508875;1508561;1508516;1508427;1508603;1508683;1508630;1508358;1508282;1508208;1508157;1508278;1508084;1508110;1508257;1508193;1508224;1508458;1508721;1508930;1508883;1509515;1509373;1509570;1509708;1509794;1510070;1510094;1510118;1510234;1510283;1510386;1510515;1510741;1510597;1510787;1510882;1511145;1511146;1511156;1511284;1511471;1511461;151152…
168.982423818838;1509061;1508877;1508945;1508629;1508832;1508545;1508502;1508662;1508789;1508716;1508770;1508420;1508290;1508280;1508343;1508235;1508158;1508160;1508289;1508146;1508388;1508585;1508732;1508962;1509179;1509551;1509556;1509742;1509949;1509877;1510061;1510120;1510198;1510435;1510382;1510503;1510618;1510727;1510800;1511045;1511091;1511195;1511174;1511228;1511399;1511371;1511624;151153…
169.076621945;1509164;1509017;1508907;1508643;1508851;1508634;1508596;1508774;1508685;1508712;1508754;1508486;1508485;1508384;1508329;1508320;1508384;1508120;1508344;1508316;1508503;1508636;1508834;1509048;1509288;1509522;1509520;1509798;1510015;1509929;1509993;1510237;1510184;1510297;1510342;1510581;1510696;1510888;1510858;1510919;1511180;1511133;1511207;1511324;1511559;1511478;1511722;1511751;1…
169.17079636993;1509166;1508963;1508868;1508733;1509042;1508619;1508722;1508775;1508803;1508778;1508661;1508617;1508384;1508211;1508348;1508440;1508258;1508197;1508286;1508228;1508309;1508583;1508798;1508978;1509130;1509428;1509651;1509902;1510113;1509785;1510065;1510261;1510308;1510358;1510375;1510457;1510670;1510691;1510876;1510894;1510976;1511229;1511258;1511364;1511547;1511428;1511535;1511689…
169.264947122106;1509082;1508984;1508991;1508706;1508977;1508813;1508712;1508696;1508903;1508854;1508727;1508557;1508527;1508424;1508469;1508335;1508253;1508172;1508233;1508367;1508505;1508660;1508895;1509053;1509308;1509544;1509655;1509829;1510036;1509936;1510146;1510355;1510327;1510426;1510458;1510500;1510798;1510877;1510991;1510966;1511211;1511362;1511231;1511381;1511539;1511611;1511557;151172…
169.359074230004;1509157;1508968;1508799;1508684;1508890;1508642;1508521;1508748;1508719;1508750;1508700;1508443;1508375;1508230;1508411;1508370;1508348;1508073;1508316;1508295;1508453;1508510;1508861;1509093;1509206;1509439;1509572;1509744;1509917;1509943;1510084;1510212;1510208;1510229;1510177;1510540;1510654;1510740;1510789;1510823;1511034;1511203;1511154;1511249;1511608;1511526;1511618;151170…
169.453177722103;1509156;1509036;1509002;1508776;1508950;1508829;1508844;1508755;1508811;1508876;1508703;1508649;1508508;1508344;1508437;1508427;1508325;1508311;1508491;1508483;1508483;1508712;1508907;1509090;1509299;1509656;1509642;1509854;1510087;1509835;1510069;1510313;1510401;1510350;1510421;1510655;1510683;1510935;1510825;1510948;1511110;1511325;1511302;1511401;1511527;1511611;1511633;151176…
169.54725762688;1509140;1509047;1508956;1508835;1509033;1508751;1508813;1508764;1508916;1508955;1508898;1508619;1508475;1508323;1508359;1508546;1508324;1508252;1508497;1508513;1508520;1508611;1508920;1509030;1509337;1509697;1509623;1509937;1510007;1510247;1510247;1510463;1510455;1510337;1510456;1510662;1510612;1510984;1510923;1511073;1511174;1511243;1511395;1511574;1511600;1511569;1511637;1511747…
169.641313972812;1509331;1509167;1509108;1508943;1509054;1509063;1508839;1509058;1508936;1508923;1509054;1508669;1508569;1508502;1508412;1508649;1508514;1508375;1508612;1508520;1508655;1508860;1509013;1509177;1509467;1509675;1509809;1510026;1510196;1509924;1510250;1510449;1510573;1510421;1510504;1510632;1510926;1511104;1511019;1511067;1511241;1511367;1511404;1511650;1511708;1511711;1511814;151187…
169.735346788376;1509208;1509110;1509068;1508992;1508952;1508820;1508656;1508882;1508942;1508921;1508958;1508662;1508446;1508455;1508440;1508573;1508417;1508368;1508458;1508288;1508529;1508743;1508998;1509124;1509208;1509763;1509594;1509908;1510104;1510028;1509943;1510351;1510408;1510329;1510423;1510664;1510728;1511004;1510921;1511081;1511279;1511345;1511412;1511476;1511586;1511617;1511664;151174…
169.829356102051;1509436;1509151;1509120;1508980;1509178;1508893;1508892;1508957;1509002;1508955;1508988;1508722;1508660;1508624;1508457;1508563;1508588;1508429;1508611;1508529;1508648;1508871;1509080;1509267;1509357;1509710;1509839;1509925;1510229;1510095;1510321;1510483;1510418;1510488;1510617;1510706;1510839;1510989;1510985;1511131;1511202;1511342;1511481;1511570;1511579;1511762;1511884;151186…
169.923341942313;1509373;1509289;1509235;1509010;1509206;1508995;1508894;1508884;1508917;1509101;1508968;1508748;1508725;1508578;1508534;1508664;1508510;1508554;1508639;1508618;1508602;1508889;1508995;1509211;1509533;1509846;1509841;1510093;1510217;1510054;1510306;1510462;1510625;1510624;1510538;1510720;1510863;1511069;1511009;1511170;1511329;1511488;1511511;1511526;1511676;1511751;1511803;151197…
170.01730433764;1509354;1509072;1509275;1508987;1509139;1508879;1508808;1508921;1508841;1509084;1508960;1508697;1508578;1508474;1508607;1508607;1508603;1508421;1508426;1508496;1508642;1508822;1509041;1509266;1509300;1509705;1509766;1510184;1510116;1510134;1510226;1510516;1510437;1510536;1510463;1510623;1510937;1511068;1511127;1511164;1511186;1511343;1511518;1511542;1511731;1511769;1511824;1511837…
170.111243316509;1509284;1509093;1509099;1508958;1509075;1508965;1508718;1508910;1508849;1509001;1508917;1508757;1508437;1508506;1508434;1508527;1508543;1508393;1508717;1508425;1508516;1508850;1509085;1509245;1509479;1509660;1509728;1510025;1510077;1510076;1510268;1510454;1510518;1510489;1510668;1510696;1510695;1511041;1510905;1511182;1511296;1511461;1511389;1511418;1511688;1511723;1511900;151180…
170.205158907399;1509307;1509180;1509116;1508926;1509110;1508897;1508849;1508841;1508918;1508805;1508946;1508652;1508524;1508551;1508498;1508506;1508478;1508485;1508577;1508550;1508562;1508810;1508852;1509268;1509345;1509686;1509735;1510003;1510194;1510071;1510126;1510396;1510397;1510429;1510421;1510710;1510823;1510899;1511102;1510989;1511223;1511470;1511405;1511456;1511534;1511776;1511822;151190…
170.299051138785;1509254;1509138;1509077;1508924;1509144;1508936;1508918;1509039;1509047;1508989;1508943;1508755;1508602;1508565;1508561;1508565;1508494;1508301;1508402;1508554;1508458;1508824;1508960;1509171;1509444;1509721;1509764;1510046;1510141;1510238;1510317;1510552;1510516;1510514;1510539;1510610;1510770;1510978;1511099;1511158;1511240;1511411;1511549;1511663;1511778;1511789;1511730;151193…
170.392920039147;1509253;1509084;1508961;1508871;1508987;1508775;1508827;1508929;1508905;1508916;1508795;1508755;1508408;1508543;1508439;1508542;1508462;1508358;1508422;1508358;1508583;1508754;1509053;1509222;1509325;1509697;1509700;1510003;1510076;1510006;1510246;1510315;1510326;1510486;1510404;1510683;1510833;1510851;1510953;1511011;1511130;1511194;1511311;1511311;1511500;1511765;1511880;151181…
170.48676563696;1509455;1509215;1509213;1509075;1509219;1509043;1508895;1509040;1509095;1509085;1509146;1508731;1508724;1508608;1508699;1508708;1508588;1508436;1508566;1508647;1508728;1509068;1509112;1509302;1509613;1509736;1509850;1510097;1510356;1510491;1510400;1510491;1510555;1510558;1510668;1510813;1510941;1511094;1511110;1511284;1511403;1511518;1511463;1511778;1511828;1511894;1512034;1512065…
170.580587960703;1509461;1509375;1509282;1509135;1509247;1509075;1509030;1509046;1509298;1509142;1509085;1508997;1508757;1508669;1508753;1508811;1508809;1508630;1508664;1508559;1508889;1509066;1509173;1509381;1509689;1509921;1509926;1510164;1510354;1510325;1510408;1510614;1510715;1510774;1510781;1510991;1511075;1511024;1511257;1511166;1511504;1511594;1511560;1511892;1511890;1511902;1512006;151199…
170.674387038853;1509618;1509417;1509341;1509188;1509238;1509210;1508954;1509017;1509103;1509244;1509177;1508835;1508764;1508642;1508707;1508756;1508686;1508643;1508723;1508656;1508699;1508961;1509062;1509334;1509628;1509891;1509993;1510200;1510422;1510195;1510603;1510642;1510711;1510610;1510680;1510984;1510948;1511266;1511283;1511366;1511402;1511552;1511687;1511660;1511880;1511915;1512176;151206…
170.768162899888;1509523;1509540;1509265;1509105;1509256;1509092;1509008;1509071;1509001;1509021;1509093;1508814;1508742;1508576;1508686;1508739;1508637;1508533;1508775;1508605;1508714;1508876;1509055;1509257;1509514;1509799;1509885;1510226;1510328;1510287;1510369;1510613;1510663;1510620;1510636;1510879;1510943;1511083;1511092;1511282;1511385;1511614;1511626;1511703;1511832;1511822;1512031;151196…
170.861915572284;1509413;1509242;1509231;1508936;1509263;1508946;1508833;1508898;1509025;1509057;1508970;1508844;1508681;1508634;1508693;1508648;1508616;1508458;1508632;1508593;1508648;1508997;1509043;1509254;1509497;1509747;1509842;1510078;1510256;1510278;1510332;1510570;1510688;1510635;1510690;1510773;1510926;1511077;1511248;1511279;1511443;1511572;1511528;1511591;1511867;1511883;1511909;151208…
170.95564508452;1509677;1509534;1509359;1509267;1509451;1509042;1509106;1509254;1509252;1509184;1509239;1508944;1508942;1508835;1508865;1508804;1508833;1508724;1508899;1508873;1508974;1509123;1509424;1509574;1509783;1509944;1510192;1510174;1510374;1510479;1510496;1510686;1510654;1510798;1510828;1510986;1511061;1511372;1511335;1511349;1511564;1511754;1511653;1511826;1512011;1512089;1512022;1512294…
171.049351465073;1509514;1509566;1509176;1509313;1509479;1509194;1509059;1509347;1509213;1509175;1509246;1508975;1508934;1508862;1508852;1508874;1508718;1508752;1508739;1508917;1508779;1509065;1509318;1509487;1509646;1510159;1510143;1510223;1510370;1510477;1510578;1510756;1510819;1510755;1510731;1510918;1511039;1511315;1511486;1511325;1511554;1511664;1511699;1511799;1511894;1512148;1512160;151213…
171.14303474242;1509695;1509427;1509461;1509223;1509492;1509117;1509119;1509195;1509262;1509231;1509331;1508923;1508948;1508747;1508855;1508891;1508895;1508630;1508896;1508749;1508871;1509092;1509261;1509492;1509694;1509956;1510198;1510394;1510458;1510629;1510744;1510746;1510845;1510859;1510890;1511063;1511073;1511325;1511488;1511511;1511590;1511783;1511822;1512040;1511928;1512057;1512234;1512176…
171.236694945038;1509560;1509445;1509341;1509169;1509412;1509080;1509127;1509205;1509210;1509181;1509232;1508943;1508917;1508959;1508856;1508919;1508752;1508735;1508710;1508734;1508760;1509037;1509222;1509288;1509682;1509952;1510006;1510368;1510468;1510448;1510540;1510681;1510745;1510661;1510799;1510940;1511022;1511375;1511291;1511458;1511581;1511687;1511687;1511744;1511953;1511868;1512138;151201…
171.330332101406;1509641;1509721;1509456;1509237;1509573;1509279;1509370;1509315;1509353;1509485;1509436;1509133;1509059;1508941;1509026;1509086;1508801;1508788;1508959;1508970;1508974;1509374;1509510;1509573;1509768;1510101;1510170;1510434;1510552;1510690;1510685;1510947;1510976;1510847;1510917;1511119;1511260;1511553;1511432;1511484;1511694;1511849;1511907;1511972;1511997;1512151;1512381;151221…
171.42394624;1509760;1509642;1509516;1509340;1509533;1509311;1509133;1509221;1509282;1509406;1509325;1509073;1508999;1508805;1508846;1508971;1508858;1508746;1508838;1508904;1508934;1509215;1509464;1509569;1509867;1510112;1510304;1510393;1510545;1510527;1510703;1510851;1510850;1510996;1510941;1511046;1511153;1511300;1511403;1511640;1511709;1511806;1511848;1511887;1512155;1512185;1512157;1512280;15…
171.517537389298;1509794;1509553;1509557;1509365;1509413;1509280;1509116;1509271;1509504;1509455;1509365;1509179;1509050;1508952;1508946;1509064;1508947;1508790;1509029;1508920;1508990;1509181;1509531;1509609;1510035;1510105;1510100;1510357;1510609;1510580;1510709;1510831;1510907;1511021;1510952;1511098;1511166;1511364;1511549;1511612;1511552;1511827;1511815;1512035;1512115;1512050;1512319;151227…
171.611105577778;1509800;1509697;1509632;1509519;1509710;1509458;1509321;1509408;1509485;1509533;1509559;1509248;1509071;1509081;1509161;1509156;1508865;1508953;1509163;1509034;1509111;1509295;1509579;1509709;1510036;1510239;1510294;1510565;1510825;1510723;1510823;1510982;1510995;1511021;1510985;1511297;1511434;1511553;1511584;1511705;1511766;1511852;1511879;1512181;1512378;1512188;1512493;151242…
171.704650833916;1509806;1509786;1509630;1509404;1509557;1509426;1509454;1509544;1509578;1509585;1509594;1509284;1509240;1509084;1509034;1509210;1509002;1508914;1509110;1509015;1509077;1509394;1509665;1509632;1509983;1510333;1510335;1510593;1510800;1510657;1510758;1511115;1511073;1511023;1511125;1511360;1511629;1511557;1511642;1511718;1511906;1512020;1512072;1512079;1512350;1512201;1512370;151244…
171.798173186191;1509968;1509779;1509570;1509400;1509771;1509415;1509378;1509492;1509508;1509520;1509408;1509289;1509113;1509062;1509022;1509137;1509020;1508995;1509035;1508970;1509084;1509466;1509658;1509742;1509943;1510289;1510277;1510405;1510752;1510669;1510843;1510937;1511035;1511014;1511144;1511402;1511358;1511640;1511544;1511710;1511868;1511954;1511894;1512094;1512324;1512316;1512305;151238…
171.89167266308;1509952;1509964;1509777;1509550;1509597;1509476;1509513;1509651;1509599;1509753;1509554;1509393;1509232;1509226;1509135;1509179;1509133;1509008;1509247;1509158;1509243;1509477;1509610;1509812;1510109;1510311;1510351;1510724;1510870;1510692;1510983;1511057;1511107;1511218;1511141;1511433;1511551;1511737;1511740;1511813;1512061;1512030;1511953;1512130;1512302;1512460;1512518;1512333…
171.98514929306;1509991;1509837;1509757;1509597;1509742;1509564;1509581;1509652;1509695;1509844;1509617;1509542;1509350;1509393;1509258;1509427;1509254;1509154;1509283;1509160;1509401;1509452;1509913;1509855;1510166;1510418;1510409;1510784;1510867;1510782;1511035;1511172;1511228;1511216;1511324;1511467;1511548;1511833;1511811;1511933;1512089;1512164;1512257;1512286;1512395;1512541;1512628;1512715…
172.078603104608;1509986;1509850;1509678;1509624;1509675;1509611;1509393;1509541;1509569;1509628;1509507;1509241;1509181;1509055;1509166;1509055;1509100;1509052;1509140;1509096;1509194;1509541;1509588;1509805;1510082;1510334;1510345;1510757;1510789;1510799;1510797;1510966;1511112;1511131;1511121;1511353;1511430;1511516;1511786;1511761;1511929;1512142;1512039;1512119;1512317;1512399;1512466;151246…
172.172034126203;1510024;1509935;1509835;1509764;1510008;1509633;1509529;1509606;1509683;1509796;1509720;1509553;1509348;1509228;1509434;1509308;1509175;1509069;1509273;1509372;1509308;1509615;1509687;1510030;1510291;1510461;1510663;1510835;1510936;1510888;1510997;1511300;1511322;1511277;1511341;1511479;1511634;1511704;1511830;1511902;1512035;1512167;1512225;1512238;1512370;1512381;1512583;151269…
172.265442386321;1510247;1510277;1510133;1509978;1510073;1509879;1509835;1509780;1509904;1510010;1509975;1509784;1509691;1509439;1509548;1509726;1509582;1509406;1509555;1509431;1509624;1509914;1510097;1510135;1510527;1510715;1510875;1511015;1511288;1511269;1511229;1511575;1511509;1511514;1511765;1511758;1511859;1512028;1512133;1512135;1512233;1512359;1512420;1512550;1512769;1512774;1512834;151301…
172.35882791344;1510053;1509937;1509752;1509575;1509618;1509701;1509554;1509564;1509743;1509810;1509763;1509563;1509335;1509294;1509306;1509356;1509277;1509155;1509313;1509309;1509201;1509612;1509819;1510042;1510227;1510488;1510610;1510803;1510861;1510916;1511176;1511140;1511351;1511200;1511377;1511530;1511572;1511817;1511775;1511928;1511976;1512203;1512341;1512344;1512446;1512632;1512714;1512706…
172.452190736037;1510257;1510046;1509813;1509786;1509788;1509841;1509617;1509798;1509807;1509930;1509809;1509679;1509572;1509379;1509482;1509599;1509371;1509450;1509414;1509472;1509479;1509764;1509813;1510012;1510398;1510705;1510748;1511012;1511182;1510979;1511071;1511223;1511301;1511309;1511480;1511635;1511730;1511910;1511944;1511896;1511965;1512345;1512277;1512507;1512563;1512534;1512784;151274…
172.545530882591;1510213;1510217;1510064;1509869;1510084;1509953;1509785;1509781;1509974;1509923;1509867;1509697;1509627;1509448;1509510;1509554;1509392;1509450;1509527;1509511;1509494;1509832;1509912;1510127;1510362;1510852;1510775;1511059;1511173;1511192;1511212;1511550;1511529;1511538;1511540;1511837;1511875;1512047;1512052;1512213;1512243;1512530;1512456;1512511;1512779;1512814;1512793;151296…
172.638848381577;1510450;1510300;1510219;1510080;1510309;1510006;1509832;1510040;1510193;1510123;1509992;1509851;1509774;1509682;1509633;1509739;1509649;1509440;1509666;1509582;1509630;1509929;1510078;1510276;1510577;1510866;1510824;1511272;1511335;1511252;1511436;1511587;1511553;1511604;1511718;1511851;1512002;1512143;1512207;1512205;1512527;1512572;1512430;1512724;1512784;1512720;1513028;151323…
172.732143261475;1510340;1510319;1510036;1510079;1510202;1510017;1509841;1509865;1509954;1509935;1509994;1509692;1509708;1509661;1509587;1509635;1509530;1509437;1509587;1509533;1509442;1509886;1509972;1510274;1510368;1510819;1510878;1510931;1511240;1511102;1511410;1511610;1511476;1511493;1511608;1511787;1511968;1512129;1511964;1512222;1512255;1512464;1512460;1512537;1512718;1512776;1513031;151304…
172.82541555076;1510520;1510343;1510304;1510193;1510315;1510114;1509949;1510090;1510096;1510213;1510069;1509941;1509899;1509799;1509804;1509846;1509695;1509584;1509748;1509615;1509608;1510014;1510197;1510289;1510568;1510953;1510953;1511278;1511337;1511398;1511627;1511571;1511654;1511696;1511802;1511909;1512065;1512252;1512312;1512340;1512688;1512747;1512820;1512780;1513046;1513025;1512991;1513006…
172.918665277911;1510494;1510472;1510252;1510126;1510354;1509966;1509995;1510133;1510078;1510315;1510237;1509995;1509999;1509729;1509712;1509819;1509675;1509426;1509751;1509747;1509753;1510042;1510284;1510329;1510530;1510900;1510999;1511329;1511457;1511404;1511438;1511616;1511781;1511805;1511820;1511960;1512174;1512241;1512302;1512350;1512563;1512669;1512749;1512910;1513055;1512999;1513121;151322…
173.011892471405;1510702;1510456;1510313;1510251;1510399;1510346;1510054;1510171;1510299;1510287;1510181;1510099;1509890;1509765;1509948;1509792;1509646;1509729;1509859;1509758;1509898;1510171;1510450;1510495;1510837;1511060;1511237;1511292;1511359;1511370;1511605;1511726;1511897;1511752;1511902;1512020;1512148;1512369;1512435;1512639;1512514;1512692;1512789;1512987;1513039;1513024;1513263;151322…
173.10509715972;1510493;1510536;1510330;1510236;1510369;1510144;1510030;1510090;1510306;1510261;1510190;1510024;1509977;1509691;1509817;1509907;1509637;1509722;1509821;1509757;1509913;1510070;1510325;1510511;1510624;1511133;1511070;1511237;1511485;1511248;1511507;1511763;1511880;1511866;1511807;1512052;1512181;1512273;1512341;1512446;1512591;1512900;1512811;1512897;1512950;1513144;1513184;1513156…
173.198279371332;1510772;1510510;1510566;1510378;1510643;1510414;1510315;1510286;1510381;1510525;1510325;1510217;1510179;1509867;1509878;1510075;1509921;1510034;1510049;1510003;1510011;1510198;1510333;1510587;1510894;1511170;1511325;1511527;1511670;1511743;1511715;1512027;1512130;1512115;1512050;1512266;1512421;1512453;1512624;1512600;1512807;1512981;1513025;1513189;1513256;1513177;1513348;151332…
173.29143913472;1510719;1510741;1510499;1510241;1510595;1510366;1510220;1510240;1510241;1510308;1510222;1510112;1509925;1509867;1509816;1509958;1509798;1509742;1509833;1509864;1509902;1510183;1510286;1510586;1510670;1511023;1511115;1511425;1511615;1511623;1511718;1511848;1511940;1511899;1512017;1512079;1512249;1512444;1512459;1512478;1512675;1512824;1512853;1513105;1513096;1513091;1513172;1513296…
173.384576478361;1510594;1510646;1510481;1510454;1510593;1510419;1510318;1510206;1510395;1510399;1510313;1510200;1510086;1509984;1510032;1509921;1509969;1509819;1510016;1509976;1510073;1510250;1510493;1510669;1510844;1511167;1511241;1511406;1511622;1511592;1511731;1511897;1512083;1512031;1512029;1512095;1512337;1512580;1512627;1512732;1512691;1512849;1513046;1513040;1513149;1513301;1513364;151323…
173.477691430731;1510876;1510829;1510765;1510569;1510741;1510508;1510523;1510554;1510773;1510572;1510520;1510397;1510208;1510148;1510258;1510175;1510061;1510083;1510252;1510173;1510275;1510598;1510517;1510891;1511011;1511310;1511590;1511719;1511886;1511773;1511931;1512203;1512213;1512213;1512293;1512376;1512426;1512735;1512810;1512721;1512932;1513266;1513149;1513215;1513336;1513501;1513726;151349…
173.57078402031;1510926;1510824;1510644;1510570;1510649;1510483;1510461;1510589;1510580;1510489;1510312;1510341;1510291;1510239;1510063;1510256;1510069;1510005;1510202;1510046;1510295;1510400;1510641;1510802;1510937;1511341;1511584;1511650;1511822;1511808;1511883;1512029;1512214;1512155;1512280;1512350;1512526;1512687;1512733;1512754;1512977;1513202;1513087;1513261;1513459;1513395;1513576;1513631…
173.663854275574;1510748;1510727;1510659;1510539;1510528;1510303;1510371;1510515;1510495;1510387;1510497;1510235;1510152;1510055;1510080;1509972;1509926;1509868;1509890;1510050;1510121;1510420;1510467;1510763;1510924;1511269;1511381;1511587;1511793;1511733;1511829;1512012;1512034;1512031;1512087;1512349;1512520;1512634;1512618;1512683;1512742;1513088;1513048;1513125;1513389;1513220;1513453;151337…
173.756902225;1510940;1510875;1510738;1510578;1510794;1510565;1510543;1510611;1510553;1510651;1510624;1510390;1510296;1510123;1510210;1510239;1509984;1510002;1510175;1510130;1510237;1510436;1510661;1510871;1510975;1511342;1511426;1511603;1511909;1511755;1511988;1512112;1512195;1512161;1512162;1512383;1512485;1512753;1512680;1512802;1512952;1513226;1513074;1513296;1513312;1513463;1513434;1513641;1…
173.849927897066;1511068;1510872;1510931;1510728;1510924;1510652;1510572;1510724;1510658;1510637;1510707;1510387;1510407;1510208;1510332;1510369;1510225;1510290;1510317;1510281;1510417;1510574;1510880;1511002;1511175;1511491;1511499;1511944;1511895;1511889;1511972;1512236;1512402;1512224;1512377;1512474;1512664;1512852;1512740;1512939;1513156;1513273;1513327;1513465;1513583;1513421;1513751;151384…
173.94293132025;1511172;1510993;1510753;1510785;1510818;1510613;1510527;1510765;1510737;1510725;1510660;1510419;1510300;1510324;1510351;1510402;1510272;1510176;1510255;1510320;1510351;1510586;1510816;1510950;1511201;1511628;1511569;1511872;1511927;1512029;1512087;1512209;1512233;1512290;1512412;1512542;1512574;1512801;1512883;1513039;1512939;1513190;1513258;1513406;1513591;1513536;1513673;1513628…
174.035912523028;1511060;1510997;1510878;1510601;1510845;1510662;1510541;1510722;1510703;1510659;1510689;1510509;1510447;1510339;1510177;1510328;1510258;1510262;1510208;1510214;1510404;1510617;1510764;1510919;1510982;1511425;1511651;1511822;1511958;1511934;1512010;1512289;1512209;1512184;1512420;1512519;1512693;1512764;1513027;1512974;1513221;1513213;1513250;1513412;1513587;1513533;1513717;151373…
174.128871533879;1511139;1511056;1510964;1510707;1510888;1510730;1510774;1510846;1510802;1510809;1510868;1510641;1510482;1510446;1510338;1510361;1510270;1510199;1510516;1510434;1510460;1510759;1510858;1511098;1511382;1511706;1511682;1511973;1512090;1512130;1512181;1512269;1512533;1512420;1512482;1512611;1512812;1512965;1513032;1513047;1513242;1513292;1513313;1513488;1513789;1513664;1513882;151386…
174.22180838128;1511120;1511096;1510845;1510693;1510939;1510798;1510651;1510752;1510814;1510692;1510728;1510576;1510556;1510295;1510311;1510481;1510266;1510190;1510374;1510462;1510407;1510695;1510841;1511056;1511329;1511631;1511606;1512031;1512132;1512144;1512217;1512412;1512360;1512432;1512409;1512680;1512755;1512843;1512906;1513151;1513123;1513401;1513272;1513486;1513615;1513549;1513768;1513947…
174.314723093708;1511233;1511061;1510897;1510754;1510893;1510699;1510513;1510776;1510846;1510947;1510742;1510598;1510432;1510337;1510318;1510466;1510349;1510313;1510455;1510379;1510477;1510695;1510879;1511086;1511349;1511520;1511860;1511888;1512088;1511994;1512087;1512343;1512272;1512368;1512414;1512657;1512800;1512973;1512873;1513005;1513239;1513319;1513283;1513518;1513666;1513536;1513741;151377…
174.40761569964;1511302;1510962;1510947;1510668;1510936;1510711;1510573;1510912;1510725;1510961;1510737;1510565;1510502;1510411;1510461;1510441;1510393;1510308;1510531;1510380;1510426;1510644;1510961;1511013;1511277;1511486;1511729;1511881;1511996;1512076;1512220;1512360;1512496;1512439;1512507;1512587;1512733;1512916;1513042;1513077;1513179;1513293;1513407;1513514;1513630;1513675;1513685;1513742…
174.500486227555;1511119;1511183;1511116;1510831;1510976;1510673;1510706;1510794;1510865;1510901;1510963;1510601;1510434;1510439;1510474;1510525;1510449;1510224;1510436;1510352;1510504;1510784;1510826;1511124;1511379;1511602;1511687;1512001;1512132;1512043;1512270;1512406;1512386;1512509;1512469;1512723;1512768;1512917;1512987;1513117;1513223;1513353;1513387;1513585;1513618;1513770;1513889;151385…
174.593334705929;1511311;1511175;1510999;1510933;1511009;1510798;1510730;1510879;1510879;1510876;1510838;1510580;1510441;1510311;1510446;1510521;1510477;1510324;1510464;1510570;1510564;1510760;1511012;1511177;1511350;1511687;1511763;1512021;1512021;1512150;1512273;1512363;1512420;1512456;1512473;1512544;1512928;1513167;1513141;1513122;1513168;1513354;1513339;1513596;1513643;1513777;1513944;151394…
174.68616116324;1511289;1511278;1511064;1510827;1511162;1510897;1510834;1510941;1510940;1511039;1510884;1510770;1510524;1510518;1510462;1510584;1510533;1510446;1510471;1510540;1510566;1510756;1510851;1511220;1511461;1511712;1511823;1512032;1512136;1512252;1512265;1512523;1512528;1512595;1512656;1512874;1512823;1513056;1513122;1513100;1513346;1513543;1513468;1513554;1513889;1513787;1513919;1513915…
174.778965627965;1511233;1511276;1511066;1510986;1511239;1510957;1510988;1511028;1511034;1511096;1510936;1510683;1510592;1510491;1510660;1510603;1510558;1510394;1510556;1510502;1510833;1510803;1510999;1511218;1511521;1511850;1511789;1512113;1512268;1512145;1512403;1512547;1512755;1512551;1512601;1512805;1512990;1513221;1513211;1513111;1513324;1513428;1513696;1513738;1513820;1513665;1513999;151402…
174.871748128583;1511272;1511369;1511124;1511017;1511115;1511021;1510878;1510858;1510934;1511006;1511011;1510787;1510646;1510422;1510542;1510666;1510477;1510390;1510444;1510621;1510491;1510859;1510988;1511178;1511366;1511774;1511669;1512152;1512255;1512194;1512437;1512582;1512503;1512433;1512611;1512891;1512776;1513100;1513116;1513285;1513299;1513497;1513486;1513596;1513737;1513839;1514005;151384…
174.964508693569;1511395;1511297;1511250;1510983;1511126;1510981;1510816;1511031;1511017;1511010;1510999;1510727;1510664;1510592;1510663;1510605;1510653;1510547;1510664;1510582;1510637;1510930;1511178;1511188;1511567;1511856;1511945;1512129;1512385;1512360;1512407;1512585;1512617;1512624;1512771;1512885;1513114;1513118;1513185;1513305;1513478;1513612;1513507;1513748;1513875;1513885;1514107;151402…
175.057247351403;1511285;1511346;1511114;1510919;1511070;1511007;1510882;1510910;1511086;1511162;1510927;1510795;1510640;1510681;1510757;1510671;1510597;1510469;1510732;1510538;1510603;1510905;1511196;1511246;1511568;1511938;1511942;1512140;1512330;1512288;1512489;1512589;1512558;1512708;1512756;1512838;1512957;1513206;1513209;1513263;1513376;1513557;1513585;1513653;1513917;1513870;1514103;151398…
175.14996413056;1511321;1511226;1511179;1510960;1511093;1510908;1510904;1510937;1511088;1511126;1510872;1510705;1510712;1510478;1510606;1510576;1510575;1510454;1510617;1510456;1510563;1510973;1511121;1511201;1511504;1511796;1511845;1512147;1512316;1512247;1512358;1512574;1512579;1512622;1512751;1512834;1512985;1513237;1513131;1513286;1513369;1513477;1513565;1513741;1513748;1513822;1513984;1513952…
175.242659059519;1511389;1511359;1511071;1510919;1511152;1511049;1511063;1511066;1510928;1510996;1510971;1510783;1510740;1510577;1510550;1510545;1510438;1510539;1510618;1510502;1510699;1510823;1511109;1511333;1511592;1511865;1511890;1512108;1512301;1512245;1512392;1512510;1512642;1512587;1512767;1512887;1513014;1513139;1513090;1513273;1513358;1513589;1513647;1513715;1513720;1513857;1514139;151406…
175.335332166757;1511438;1511307;1511167;1511042;1511274;1510941;1510971;1511043;1511110;1511171;1511149;1510823;1510620;1510575;1510671;1510615;1510672;1510422;1510554;1510685;1510680;1510782;1511140;1511361;1511588;1511839;1512090;1512247;1512364;1512295;1512489;1512586;1512641;1512639;1512751;1512878;1513126;1513271;1513218;1513424;1513517;1513640;1513762;1513741;1513892;1514026;1514180;151417…
175.427983480752;1511566;1511437;1511358;1511117;1511339;1511216;1511022;1511212;1511159;1511237;1511142;1511015;1510929;1510695;1510794;1510834;1510791;1510718;1510731;1510764;1510871;1511116;1511267;1511541;1511669;1512073;1512073;1512336;1512400;1512363;1512574;1512813;1512815;1512696;1512853;1512982;1513281;1513272;1513350;1513409;1513606;1513822;1513842;1513810;1514077;1514154;1514201;151418…
175.52061302998;1511658;1511493;1511341;1511375;1511356;1511196;1511028;1511118;1511347;1511300;1511261;1511132;1510920;1510739;1510769;1510916;1510825;1510821;1510829;1510916;1510864;1511127;1511225;1511655;1511688;1512079;1512188;1512456;1512538;1512381;1512701;1512792;1512829;1512904;1512924;1513086;1513212;1513337;1513478;1513510;1513650;1513787;1513901;1513969;1514091;1514181;1514234;1514311…
175.61322084292;1511721;1511450;1511420;1511248;1511335;1511224;1511059;1511275;1511278;1511372;1511196;1510967;1510898;1510770;1510872;1510987;1510770;1510849;1510716;1510813;1511021;1511210;1511348;1511510;1511765;1512175;1512148;1512358;1512439;1512559;1512711;1512800;1512958;1512856;1512929;1513058;1513134;1513320;1513433;1513520;1513732;1513930;1513906;1514066;1514164;1514212;1514294;1514274…
175.705806948049;1511872;1511836;1511722;1511493;1511737;1511321;1511297;1511506;1511624;1511524;1511462;1511277;1511206;1511107;1511103;1511143;1510958;1510980;1511078;1511249;1511107;1511369;1511661;1511839;1511993;1512301;1512440;1512743;1512699;1512820;1512968;1513139;1513129;1513063;1513091;1513286;1513487;1513673;1513695;1513827;1513909;1514084;1514074;1514353;1514545;1514401;1514606;151459…
175.798371373844;1511899;1511865;1511615;1511492;1511695;1511424;1511332;1511462;1511555;1511568;1511478;1511375;1511241;1510998;1511072;1511142;1510941;1511142;1511071;1510974;1511198;1511384;1511639;1511911;1512187;1512258;1512353;1512640;1512798;1512816;1512802;1513039;1512969;1513117;1513172;1513318;1513525;1513626;1513582;1513767;1514015;1514107;1514153;1514183;1514347;1514467;1514520;151458…
175.890914148782;1511997;1511834;1511753;1511649;1511746;1511774;1511467;1511673;1511669;1511669;1511592;1511461;1511220;1511191;1511187;1511313;1511201;1511125;1511230;1511204;1511218;1511532;1511719;1512002;1512083;1512521;1512640;1512749;1512947;1512995;1512985;1513158;1513128;1513371;1513255;1513465;1513728;1513896;1513902;1513967;1514031;1514165;1514171;1514330;1514549;1514656;1514671;151461…
175.983435301342;1511957;1511966;1511894;1511719;1511716;1511557;1511553;1511741;1511702;1511743;1511706;1511393;1511384;1511303;1511298;1511342;1511137;1511078;1511311;1511190;1511369;1511458;1511757;1511858;1512119;1512492;1512598;1512874;1512978;1513017;1513035;1513377;1513313;1513351;1513398;1513523;1513760;1513902;1513789;1513904;1514208;1514368;1514171;1514426;1514609;1514539;1514763;151479…
176.07593486;1512140;1511900;1511921;1511632;1511942;1511617;1511599;1511656;1511703;1511720;1511688;1511458;1511483;1511362;1511404;1511236;1511368;1511281;1511334;1511315;1511196;1511746;1511818;1512104;1512288;1512541;1512618;1512999;1512986;1513139;1513118;1513316;1513360;1513303;1513476;1513624;1513774;1513931;1513845;1514033;1514039;1514283;1514417;1514497;1514595;1514685;1514866;1514833;15…
176.168412853234;1512287;1511996;1511865;1511663;1511832;1511636;1511592;1511610;1511701;1511755;1511598;1511600;1511470;1511277;1511258;1511429;1511262;1511147;1511374;1511339;1511292;1511614;1511823;1512051;1512140;1512594;1512584;1512892;1513009;1513004;1513170;1513359;1513332;1513295;1513343;1513683;1513717;1513865;1513785;1514081;1514240;1514346;1514555;1514551;1514702;1514630;1514768;151489…
176.260869309522;1512268;1512194;1511897;1511853;1511863;1511720;1511636;1511715;1511819;1511866;1511771;1511584;1511468;1511423;1511256;1511397;1511291;1511144;1511416;1511382;1511316;1511648;1511868;1512086;1512314;1512725;1512680;1513050;1513021;1513146;1513265;1513401;1513416;1513522;1513444;1513852;1513858;1513959;1514084;1514044;1514235;1514352;1514465;1514692;1514595;1514713;1514805;151480…
176.35330425734;1512193;1512053;1511899;1511693;1511954;1511835;1511700;1511726;1511840;1511907;1511771;1511668;1511473;1511330;1511415;1511447;1511334;1511395;1511436;1511388;1511475;1511660;1511979;1512056;1512347;1512679;1512738;1513047;1513216;1513107;1513092;1513475;1513443;1513519;1513453;1513724;1513765;1514032;1514065;1514242;1514249;1514462;1514430;1514511;1514727;1514845;1514773;1514913…
176.445717725167;1512232;1512207;1512034;1511895;1511934;1511899;1511733;1511759;1511935;1511910;1512023;1511681;1511535;1511529;1511377;1511572;1511559;1511313;1511499;1511507;1511614;1511811;1511994;1512126;1512456;1512717;1512791;1513088;1513166;1513131;1513342;1513579;1513433;1513508;1513604;1513832;1513775;1514113;1514059;1514328;1514275;1514490;1514489;1514740;1514735;1514782;1514913;151511…
176.53810974148;1512400;1512279;1512106;1511881;1512117;1511897;1511963;1511855;1512045;1512210;1511951;1511782;1511708;1511731;1511627;1511684;1511497;1511458;1511630;1511518;1511729;1511966;1512162;1512419;1512532;1512853;1512840;1513141;1513431;1513296;1513455;1513582;1513697;1513713;1513743;1513901;1514066;1514245;1514280;1514364;1514345;1514731;1514660;1514741;1514929;1514988;1515068;1515012…
176.630480334756;1512493;1512387;1512169;1512092;1512313;1512076;1511828;1511926;1512124;1512074;1512017;1511981;1511832;1511647;1511706;1511640;1511614;1511617;1511703;1511688;1511690;1511977;1512177;1512495;1512488;1512924;1512973;1513278;1513386;1513531;1513458;1513645;1513822;1513673;1513728;1514003;1514182;1514339;1514358;1514461;1514487;1514790;1514565;1514816;1514985;1515029;1515166;151517…
176.722829533472;1512624;1512504;1512266;1512043;1512240;1512219;1511962;1512118;1512174;1512179;1512059;1511895;1511823;1511656;1511725;1511756;1511762;1511748;1511702;1511552;1511674;1511977;1512290;1512378;1512600;1513024;1512974;1513285;1513341;1513396;1513504;1513718;1513826;1513766;1513828;1513935;1514022;1514299;1514470;1514458;1514545;1514811;1514824;1514898;1515034;1515001;1515195;151515…
176.815157366107;1512491;1512481;1512388;1512102;1512367;1512183;1511945;1511982;1512182;1512171;1512082;1511996;1511907;1511703;1511764;1511819;1511560;1511639;1511886;1511609;1511710;1511930;1512190;1512447;1512596;1512915;1512972;1513178;1513443;1513365;1513591;1513716;1513871;1513745;1513800;1513927;1514165;1514440;1514460;1514457;1514646;1514673;1514857;1514820;1515147;1515078;1515075;151511…
176.907463861137;1512597;1512520;1512372;1512328;1512383;1512089;1512017;1512205;1512251;1512263;1512258;1512066;1511874;1511853;1511918;1511886;1511796;1511709;1511736;1511915;1511966;1512011;1512395;1512580;1512871;1513028;1513187;1513460;1513634;1513527;1513722;1513816;1513984;1513908;1513850;1514068;1514116;1514495;1514627;1514532;1514736;1514886;1514838;1515025;1515176;1515227;1515333;151541…
176.99974904704;1512665;1512563;1512296;1512322;1512380;1512368;1512176;1512231;1512412;1512418;1512355;1512076;1511950;1511800;1511850;1511955;1511723;1511683;1511809;1511806;1511861;1512158;1512408;1512479;1512806;1513133;1513167;1513474;1513540;1513576;1513740;1513922;1513955;1513872;1513993;1514069;1514414;1514505;1514400;1514559;1514741;1515000;1514943;1515048;1515287;1515175;1515471;1515349…
177.092012952293;1512736;1512580;1512371;1512363;1512514;1512304;1512148;1512326;1512303;1512338;1512189;1512117;1511853;1511836;1511925;1512029;1511860;1511907;1511898;1511859;1511968;1512164;1512436;1512711;1512846;1513118;1513257;1513515;1513647;1513649;1513853;1513921;1513895;1513954;1514007;1514236;1514395;1514531;1514494;1514574;1514850;1515016;1515037;1515085;1515313;1515273;1515404;151534…
177.184255605375;1512685;1512433;1512453;1512264;1512456;1512353;1512234;1512278;1512449;1512435;1512313;1512141;1511978;1511876;1511846;1511967;1511901;1511708;1511833;1511873;1512027;1512200;1512404;1512563;1512819;1513089;1513179;1513423;1513642;1513588;1513789;1513930;1513904;1514000;1514058;1514174;1514181;1514592;1514703;1514655;1514810;1515039;1514991;1515072;1515202;1515230;1515233;151539…
177.276477034761;1512650;1512550;1512543;1512272;1512562;1512155;1512108;1512255;1512340;1512257;1512300;1512067;1511933;1511917;1511832;1511925;1511887;1511932;1511874;1511756;1511773;1512206;1512291;1512638;1512761;1513141;1513090;1513496;1513631;1513612;1513692;1513882;1514007;1514006;1514037;1514115;1514394;1514487;1514539;1514599;1514744;1514961;1515010;1515107;1515209;1515241;1515350;151546…
177.368677268931;1512766;1512680;1512662;1512485;1512565;1512349;1512259;1512387;1512528;1512445;1512546;1512235;1512247;1512051;1512048;1512154;1512033;1511832;1512046;1512068;1512063;1512357;1512577;1512692;1513022;1513342;1513435;1513606;1513745;1513736;1514038;1514047;1514103;1514113;1514340;1514295;1514335;1514736;1514724;1514673;1515064;1515074;1515028;1515273;1515371;1515336;1515570;151545…
177.46085633636;1512886;1512703;1512588;1512381;1512549;1512404;1512396;1512523;1512498;1512681;1512482;1512070;1512106;1511967;1512008;1512182;1511999;1511817;1512053;1512213;1512126;1512459;1512555;1512802;1513192;1513375;1513475;1513516;1513803;1513700;1513934;1514081;1514266;1514174;1514182;1514348;1514494;1514660;1514720;1514740;1514936;1515156;1515245;1515236;1515475;1515366;1515545;1515552…
177.553014265527;1513028;1512936;1512690;1512754;1512750;1512594;1512654;1512569;1512642;1512690;1512577;1512244;1512333;1512143;1512310;1512292;1512278;1512154;1512193;1512194;1512319;1512542;1512778;1512898;1513098;1513495;1513536;1513819;1513944;1514021;1514052;1514221;1514270;1514355;1514305;1514483;1514590;1514910;1514899;1514942;1515007;1515110;1515395;1515374;1515472;1515685;1515713;151569…
177.645151084909;1512842;1512740;1512640;1512354;1512477;1512326;1512305;1512347;1512465;1512549;1512366;1512296;1512181;1511997;1511970;1511994;1511978;1511867;1511920;1512022;1511960;1512287;1512579;1512799;1513078;1513243;1513310;1513551;1513803;1513857;1513960;1514099;1514032;1514070;1514192;1514170;1514408;1514758;1514757;1514694;1514907;1515030;1515165;1515265;1515425;1515307;1515580;151559…
177.737266822984;1512866;1512836;1512629;1512587;1512707;1512452;1512459;1512436;1512675;1512575;1512491;1512408;1512264;1512163;1512131;1512196;1512116;1512031;1512088;1512153;1511961;1512373;1512630;1512816;1513069;1513412;1513471;1513571;1513886;1513935;1513851;1514276;1514004;1514145;1514244;1514524;1514655;1514788;1514660;1514901;1515026;1515151;1515177;1515342;1515480;1515474;1515612;151571…
177.829361508228;1513111;1513029;1512864;1512549;1513023;1512808;1512572;1512703;1512744;1512843;1512778;1512467;1512351;1512233;1512354;1512304;1512257;1512040;1512478;1512261;1512328;1512682;1512770;1513048;1513302;1513637;1513602;1513880;1514117;1514052;1514296;1514377;1514420;1514356;1514432;1514649;1514697;1514942;1514980;1515138;1515361;1515391;1515348;1515576;1515654;1515763;1515778;151587…
177.92143516912;1513187;1513094;1512926;1512840;1512890;1512786;1512665;1512782;1512829;1512816;1512862;1512562;1512498;1512438;1512502;1512351;1512292;1512265;1512368;1512337;1512377;1512593;1512828;1513101;1513354;1513633;1513693;1513944;1514149;1514139;1514327;1514450;1514328;1514496;1514466;1514674;1514865;1514980;1515102;1515195;1515356;1515448;1515390;1515589;1515747;1515766;1515894;1515844…
178.013487834137;1513395;1513122;1512999;1512838;1513137;1512939;1512850;1512970;1512864;1513017;1512873;1512602;1512598;1512505;1512464;1512595;1512475;1512417;1512560;1512460;1512422;1512897;1513048;1513230;1513490;1513829;1513820;1514100;1514294;1514333;1514372;1514554;1514548;1514667;1514672;1514786;1515055;1515144;1515114;1515247;1515394;1515657;1515562;1515849;1515849;1515922;1516024;151602…
178.105519531756;1513290;1513226;1513089;1512816;1512973;1512817;1512776;1512772;1513074;1512938;1512755;1512635;1512613;1512538;1512534;1512608;1512599;1512422;1512583;1512498;1512634;1512799;1513003;1513120;1513592;1513690;1513800;1514182;1514215;1514125;1514380;1514650;1514557;1514595;1514611;1514863;1514990;1515148;1515162;1515351;1515347;1515551;1515532;1515819;1515864;1515893;1516027;151596…
178.197530290454;1513538;1513356;1513255;1513142;1513245;1513129;1512961;1513125;1513131;1513165;1513140;1513025;1512794;1512740;1512789;1512872;1512649;1512630;1512691;1512696;1512637;1513046;1513273;1513403;1513637;1513966;1514086;1514379;1514391;1514354;1514525;1514773;1514854;1514786;1515020;1515126;1515068;1515329;1515511;1515513;1515769;1515827;1515859;1515910;1516095;1516177;1516322;151621…
178.28952013871;1513563;1513394;1513415;1513102;1513391;1513187;1513078;1513172;1513206;1513344;1513182;1513033;1512951;1512777;1512723;1512829;1512707;1512610;1512839;1512861;1512871;1513064;1513394;1513502;1513825;1514075;1514136;1514445;1514649;1514467;1514781;1514854;1514926;1514798;1514950;1515047;1515250;1515428;1515480;1515540;1515786;1515846;1515963;1515905;1516237;1516284;1516391;1516452…
178.381489105;1513989;1513812;1513728;1513450;1513648;1513458;1513430;1513409;1513500;1513718;1513390;1513312;1513206;1513085;1513188;1513282;1513035;1513089;1513069;1513025;1513177;1513482;1513731;1513884;1513988;1514423;1514502;1514771;1514958;1514883;1515048;1515160;1515298;1515318;1515292;1515497;1515565;1515853;1515827;1515969;1516160;1516189;1516400;1516292;1516508;1516620;1516753;1516765;1…
178.473437217802;1513939;1513843;1513709;1513510;1513635;1513396;1513374;1513505;1513337;1513589;1513407;1513145;1513210;1513037;1513079;1513309;1513062;1513124;1513132;1513004;1513061;1513432;1513622;1513947;1513979;1514332;1514465;1514667;1514651;1514833;1514995;1515177;1515138;1515296;1515176;1515547;1515598;1515816;1515751;1515871;1516091;1516224;1516340;1516402;1516482;1516453;1516664;151672…
178.565364505594;1513893;1513828;1513703;1513534;1513658;1513531;1513343;1513591;1513439;1513586;1513467;1513371;1513312;1513154;1513107;1513162;1513107;1513065;1513127;1513178;1513153;1513479;1513634;1513845;1514107;1514393;1514515;1514752;1514957;1514896;1515000;1515210;1515174;1515313;1515295;1515593;1515671;1515814;1515776;1515895;1516176;1516230;1516285;1516481;1516617;1516614;1516635;151678…
178.657270996852;1513916;1513956;1513901;1513649;1513730;1513805;1513620;1513762;1513766;1513667;1513788;1513538;1513356;1513347;1513325;1513241;1513353;1513049;1513266;1513307;1513363;1513616;1513721;1514177;1514313;1514460;1514643;1514919;1515030;1514982;1515107;1515304;1515320;1515246;1515464;1515564;1515716;1515985;1515984;1516159;1516198;1516502;1516413;1516585;1516707;1516768;1516769;151696…
178.749156720055;1514132;1514078;1514066;1513816;1513980;1513896;1513617;1513769;1513784;1513701;1513795;1513692;1513489;1513404;1513387;1513582;1513347;1513288;1513424;1513357;1513482;1513699;1513967;1514095;1514376;1514650;1514840;1514980;1515152;1515067;1515249;1515592;1515534;1515566;1515671;1515870;1515954;1516078;1515988;1516068;1516361;1516531;1516596;1516623;1516846;1516890;1516936;151710…
178.84102170368;1514302;1514085;1514085;1513887;1513954;1513726;1513677;1513930;1513800;1513913;1513923;1513648;1513539;1513458;1513397;1513457;1513472;1513404;1513519;1513378;1513495;1513821;1514046;1514067;1514463;1514744;1514893;1515122;1515207;1515345;1515376;1515601;1515566;1515547;1515740;1515730;1515947;1516115;1516041;1516286;1516290;1516625;1516634;1516647;1516843;1516987;1517071;1517106…
178.932865976204;1514198;1514097;1514007;1513893;1513845;1513970;1513599;1513751;1513885;1513874;1513785;1513627;1513470;1513348;1513544;1513538;1513468;1513423;1513460;1513407;1513416;1513754;1513976;1514149;1514347;1514688;1514827;1515121;1515182;1515178;1515210;1515620;1515664;1515484;1515623;1515678;1515998;1516112;1516172;1516264;1516366;1516488;1516612;1516629;1516874;1517010;1517062;151713…
179.024689566104;1514272;1514225;1514085;1513921;1514056;1513929;1513740;1513932;1514009;1514089;1513970;1513613;1513610;1513466;1513490;1513648;1513513;1513447;1513596;1513468;1513636;1513749;1514116;1514247;1514548;1514869;1514874;1515120;1515292;1515232;1515514;1515558;1515775;1515668;1515658;1515942;1516010;1516253;1516184;1516350;1516595;1516639;1516622;1516829;1516874;1517027;1517023;151709…
179.116492501859;1514414;1514289;1514025;1513951;1514226;1513830;1513925;1513949;1514123;1514106;1514086;1513804;1513553;1513639;1513678;1513583;1513666;1513474;1513613;1513509;1513639;1513941;1514133;1514410;1514557;1514937;1514959;1515220;1515327;1515395;1515499;1515615;1515697;1515747;1515737;1515950;1516185;1516259;1516223;1516366;1516565;1516754;1516713;1516930;1517010;1517208;1517181;151724…
179.208274811945;1514530;1514347;1514273;1514083;1514267;1514221;1514065;1514166;1514392;1514285;1514226;1513965;1513914;1513699;1513773;1513878;1513825;1513636;1513730;1513874;1513822;1514167;1514321;1514574;1514931;1515041;1515207;1515447;1515617;1515593;1515723;1515914;1515876;1515870;1515912;1516169;1516306;1516530;1516557;1516728;1516687;1517008;1516946;1517099;1517236;1517155;1517318;151739…
179.30003652484;1514687;1514564;1514462;1514259;1514598;1514287;1514180;1514359;1514442;1514423;1514345;1514118;1513973;1513938;1513893;1514175;1513997;1513878;1513886;1514043;1514100;1514238;1514510;1514775;1514895;1515210;1515404;1515593;1515643;1515719;1515848;1516063;1516013;1516090;1516207;1516350;1516369;1516651;1516762;1516844;1516867;1517076;1517214;1517241;1517328;1517358;1517640;1517611…
179.391777669021;1514783;1514497;1514542;1514356;1514384;1514381;1514203;1514242;1514327;1514399;1514249;1513980;1514017;1513906;1513961;1514077;1513970;1513722;1513994;1513825;1513916;1514242;1514493;1514611;1514830;1515221;1515374;1515575;1515655;1515701;1515842;1516053;1515946;1516059;1516116;1516228;1516408;1516558;1516702;1516812;1516900;1517017;1516992;1517269;1517322;1517310;1517421;151763…
179.483498272967;1514837;1514817;1514602;1514580;1514617;1514469;1514326;1514473;1514546;1514568;1514526;1514348;1514143;1514023;1514148;1514096;1514192;1514006;1514137;1514182;1514189;1514301;1514654;1514799;1515081;1515438;1515526;1515772;1515970;1515949;1515922;1516300;1516230;1516384;1516272;1516584;1516504;1516800;1516826;1516907;1517033;1517189;1517149;1517397;1517529;1517638;1517751;151757…
179.575198365153;1514937;1514864;1514763;1514579;1514703;1514581;1514421;1514595;1514626;1514594;1514607;1514276;1514300;1514145;1514183;1514250;1514079;1514174;1514289;1514189;1514181;1514535;1514808;1514918;1515279;1515533;1515563;1515879;1515912;1515910;1515999;1516248;1516333;1516274;1516399;1516609;1516859;1517031;1516850;1517012;1517097;1517403;1517280;1517537;1517657;1517713;1517854;151780…
179.666877974059;1515071;1515111;1514738;1514690;1514939;1514730;1514592;1514662;1514714;1514815;1514757;1514469;1514436;1514267;1514234;1514400;1514236;1514216;1514231;1514338;1514303;1514583;1514922;1515193;1515285;1515608;1515576;1515843;1516081;1516105;1516126;1516519;1516455;1516456;1516481;1516709;1516874;1517027;1517146;1517220;1517334;1517386;1517339;1517520;1517800;1517843;1517922;151799…
179.75853712816;1515130;1515094;1514942;1514733;1514924;1514702;1514733;1514744;1514909;1514821;1514865;1514606;1514408;1514464;1514424;1514512;1514270;1514346;1514456;1514362;1514460;1514780;1514908;1515306;1515405;1515807;1515734;1516001;1516136;1516192;1516238;1516485;1516503;1516669;1516491;1516879;1516905;1516984;1517286;1517225;1517404;1517570;1517560;1517696;1517908;1517844;1518092;1518082…
179.850175855935;1515478;1515313;1515170;1514964;1515105;1515057;1514853;1514918;1515126;1515045;1515033;1514757;1514712;1514514;1514718;1514577;1514691;1514556;1514716;1514585;1514660;1514933;1515043;1515510;1515684;1515853;1516026;1516095;1516469;1516361;1516491;1516672;1516826;1516806;1516693;1517026;1517189;1517239;1517354;1517438;1517616;1517654;1517729;1517892;1518141;1518150;1518248;151831…
179.941794185861;1515756;1515404;1515334;1515334;1515300;1515325;1515057;1515297;1515372;1515416;1515315;1515035;1514817;1514801;1514861;1514883;1514684;1514721;1514881;1514884;1514876;1515118;1515384;1515576;1515851;1516112;1516341;1516495;1516701;1516676;1516534;1516909;1516860;1516968;1517024;1517153;1517380;1517562;1517549;1517688;1517838;1517878;1517987;1518157;1518234;1518374;1518482;151851…
180.033392146416;1515509;1515529;1515256;1515193;1515145;1515117;1514956;1515176;1515266;1515255;1515157;1514839;1514890;1514792;1514802;1514790;1514649;1514553;1514630;1514676;1514783;1515149;1515286;1515528;1515718;1515953;1515971;1516262;1516588;1516482;1516624;1516854;1516923;1516842;1516970;1517058;1517236;1517543;1517373;1517591;1517967;1517849;1517950;1518068;1518126;1518254;1518436;151843…
180.124969766076;1515742;1515666;1515401;1515227;1515433;1515209;1515102;1515241;1515275;1515388;1515338;1515131;1514851;1514828;1514752;1514826;1514581;1514641;1514886;1514769;1514903;1515187;1515391;1515619;1515698;1516197;1516242;1516609;1516722;1516617;1516749;1516901;1517012;1516984;1517039;1517304;1517370;1517668;1517625;1517734;1517822;1518014;1518001;1518145;1518466;1518397;1518464;151863…
180.21652707332;1515701;1515640;1515516;1515410;1515514;1515270;1515271;1515229;1515552;1515564;1515193;1515177;1515084;1514903;1514934;1515107;1514929;1514881;1514932;1514827;1515037;1515237;1515503;1515650;1515897;1516259;1516258;1516661;1516886;1516708;1516795;1517132;1517117;1517177;1517189;1517366;1517627;1517643;1517726;1517850;1518015;1518280;1518106;1518259;1518461;1518413;1518612;1518474…
180.308064096625;1515812;1515680;1515400;1515323;1515613;1515247;1515220;1515348;1515436;1515455;1515280;1515153;1515083;1514970;1515032;1515105;1514954;1514915;1514984;1514904;1514974;1515308;1515431;1515753;1515847;1516068;1516241;1516525;1516786;1516641;1516892;1516987;1517103;1517074;1517140;1517461;1517487;1517541;1517738;1517830;1517938;1518219;1518154;1518262;1518338;1518507;1518670;151858…
180.399580864468;1516005;1515755;1515747;1515695;1515894;1515613;1515451;1515566;1515696;1515600;1515568;1515325;1515185;1515117;1515193;1515247;1515050;1514972;1515156;1515150;1515312;1515598;1515715;1515869;1516118;1516539;1516569;1516896;1517040;1516822;1517138;1517238;1517477;1517357;1517382;1517587;1517655;1517866;1517912;1518030;1518153;1518352;1518402;1518584;1518725;1518667;1518829;151897…
180.491077405326;1516147;1515715;1515699;1515531;1515735;1515551;1515414;1515576;1515560;1515539;1515513;1515299;1515281;1515054;1515182;1515247;1515160;1515172;1515118;1515013;1515137;1515445;1515711;1515902;1516156;1516503;1516494;1516903;1517016;1516893;1517050;1517311;1517359;1517309;1517376;1517597;1517779;1518005;1517977;1518002;1518242;1518225;1518350;1518528;1518632;1518570;1518933;151879…
180.582553747678;1516155;1516098;1515777;1515681;1515795;1515717;1515496;1515761;1515641;1515633;1515566;1515391;1515455;1515215;1515189;1515416;1515348;1515128;1515377;1515246;1515196;1515739;1515831;1516041;1516375;1516689;1516692;1516949;1517015;1517046;1517299;1517406;1517516;1517644;1517443;1517629;1517835;1518087;1518055;1518139;1518412;1518359;1518436;1518767;1518814;1518741;1518911;151895…
180.67400992;1516161;1516169;1516018;1515847;1516017;1515727;1515605;1515781;1515839;1515899;1515860;1515690;1515443;1515381;1515465;1515472;1515388;1515399;1515468;1515403;1515544;1515774;1515974;1516197;1516489;1516789;1516871;1517125;1517302;1517212;1517337;1517678;1517648;1517485;1517663;1517849;1517982;1518137;1518207;1518270;1518333;1518727;1518666;1518725;1519014;1518953;1519030;1519252;15…
180.76544595077;1516423;1516416;1516038;1516028;1516190;1515993;1515917;1515956;1516077;1516143;1516000;1515850;1515727;1515588;1515667;1515792;1515529;1515440;1515590;1515521;1515726;1515876;1516173;1516424;1516504;1516950;1517116;1517260;1517560;1517442;1517563;1517728;1517728;1517970;1517801;1518039;1518151;1518409;1518450;1518621;1518637;1518819;1518957;1518950;1519211;1519204;1519192;1519242…
180.856861868466;1516565;1516340;1516180;1516274;1516173;1515987;1516028;1516087;1516234;1516134;1516098;1515908;1515840;1515615;1515820;1515899;1515803;1515515;1515688;1515659;1515799;1516105;1516244;1516562;1516775;1516999;1517118;1517459;1517662;1517571;1517594;1517814;1517883;1517910;1518019;1518137;1518427;1518447;1518646;1518629;1518735;1518917;1518950;1519118;1519371;1519178;1519482;151937…
180.948257701564;1516941;1516805;1516533;1516616;1516607;1516418;1516387;1516448;1516644;1516582;1516571;1516272;1516141;1515997;1516189;1516156;1516136;1515944;1516088;1516046;1516156;1516322;1516638;1517023;1517182;1517553;1517537;1517848;1518019;1518000;1517990;1518266;1518218;1518321;1518416;1518595;1518693;1518732;1518841;1518999;1519082;1519443;1519358;1519485;1519653;1519697;1519840;151975…
181.039633478543;1516717;1516610;1516568;1516407;1516583;1516323;1516109;1516276;1516473;1516362;1516507;1516223;1516166;1515900;1516124;1516102;1515906;1515885;1516049;1515955;1515974;1516400;1516563;1516706;1516998;1517244;1517333;1517565;1517882;1517791;1517930;1518231;1518314;1518266;1518232;1518448;1518507;1518856;1518772;1518835;1518966;1519116;1519124;1519341;1519516;1519544;1519619;151957…
181.13098922788;1517024;1516819;1516769;1516631;1516879;1516548;1516509;1516621;1516697;1516700;1516506;1516466;1516137;1516274;1516196;1516402;1516153;1516097;1516235;1516123;1516293;1516450;1516779;1516843;1517322;1517563;1517664;1517849;1518071;1517999;1518070;1518278;1518227;1518494;1518385;1518577;1518741;1518967;1518965;1519027;1519217;1519406;1519473;1519511;1519763;1519703;1519798;1519853…
181.222324978052;1517102;1516903;1516718;1516499;1516777;1516538;1516444;1516519;1516555;1516730;1516601;1516371;1516212;1516015;1516222;1516205;1516105;1516045;1516171;1516078;1516180;1516527;1516702;1516923;1517150;1517466;1517603;1517892;1518070;1517905;1518129;1518206;1518287;1518474;1518365;1518608;1518847;1519032;1518977;1518935;1519176;1519312;1519553;1519504;1519681;1519794;1520042;151995…
181.313640757536;1517183;1516849;1516793;1516715;1516888;1516526;1516774;1516650;1516554;1516720;1516689;1516575;1516324;1516275;1516316;1516313;1516300;1516185;1516288;1516268;1516387;1516591;1516779;1516999;1517251;1517560;1517649;1518024;1518183;1518239;1518343;1518398;1518562;1518489;1518518;1518726;1518790;1518995;1519050;1519210;1519263;1519403;1519632;1519718;1519888;1519883;1520024;151995…
181.404936594811;1517259;1517217;1517161;1516879;1516939;1516799;1516697;1516988;1516958;1516924;1516947;1516710;1516633;1516329;1516536;1516552;1516547;1516474;1516537;1516453;1516495;1516885;1517160;1517260;1517588;1517739;1517936;1518184;1518324;1518410;1518458;1518680;1518875;1518839;1518694;1518995;1519060;1519441;1519145;1519422;1519590;1519691;1519872;1519883;1520022;1520114;1520321;152012…
181.496212518353;1517253;1517374;1517229;1517239;1517305;1517082;1516997;1517110;1517065;1517222;1517172;1516851;1516703;1516696;1516708;1516733;1516630;1516574;1516563;1516679;1516634;1516987;1517310;1517330;1517772;1518090;1518006;1518427;1518519;1518494;1518624;1518876;1518859;1518818;1519000;1519140;1519168;1519550;1519492;1519562;1519738;1519878;1520041;1520156;1520222;1520289;1520302;152042…
181.58746855664;1517628;1517473;1517294;1517191;1517421;1517142;1517018;1517243;1517136;1517230;1517161;1516921;1516858;1516785;1516723;1516831;1516720;1516703;1516797;1516722;1516678;1517222;1517414;1517420;1517847;1518098;1518191;1518519;1518627;1518669;1518840;1518995;1518967;1519052;1519023;1519234;1519426;1519566;1519652;1519649;1519733;1520103;1520084;1520171;1520480;1520280;1520499;1520484…
181.678704738149;1517769;1517463;1517244;1517177;1517446;1517025;1516951;1517061;1517305;1517213;1517130;1516880;1516868;1516603;1516690;1516828;1516576;1516567;1516794;1516750;1516762;1517021;1517355;1517404;1517959;1518023;1518259;1518443;1518587;1518630;1518739;1518918;1519004;1519042;1518975;1519327;1519367;1519554;1519610;1519665;1519901;1520087;1520139;1520093;1520212;1520412;1520667;152058…
181.769921091359;1517811;1517650;1517577;1517226;1517453;1517237;1517193;1517433;1517365;1517506;1517373;1517149;1517056;1516851;1517094;1517055;1516779;1516814;1516887;1516982;1516963;1517258;1517476;1517808;1518012;1518421;1518475;1518616;1518757;1518820;1518872;1519120;1519129;1519263;1519210;1519348;1519641;1519835;1519899;1519899;1520090;1520223;1520426;1520401;1520526;1520567;1520636;152073…
181.861117644745;1518021;1517906;1517782;1517512;1517774;1517594;1517536;1517644;1517699;1517809;1517650;1517466;1517293;1517326;1517166;1517334;1517246;1517082;1517176;1517152;1517288;1517608;1517679;1517986;1518301;1518547;1518696;1518907;1519139;1519115;1519191;1519439;1519454;1519459;1519386;1519744;1519736;1520090;1520064;1520143;1520236;1520607;1520559;1520615;1520836;1520857;1520982;152099…
181.952294426787;1518125;1518164;1517978;1517842;1517951;1517770;1517778;1517796;1517961;1517950;1517857;1517682;1517495;1517463;1517588;1517463;1517376;1517420;1517498;1517513;1517568;1517782;1518049;1518205;1518490;1518790;1518841;1519075;1519350;1519303;1519371;1519569;1519580;1519714;1519821;1519969;1519881;1520275;1520350;1520432;1520658;1520651;1520840;1520806;1521035;1521194;1521272;152119…
182.04345146596;1518160;1518046;1518013;1517733;1517884;1517845;1517766;1517852;1517830;1517782;1517786;1517603;1517423;1517354;1517498;1517458;1517274;1517243;1517437;1517362;1517448;1517855;1517930;1518065;1518401;1518822;1518713;1519118;1519324;1519303;1519389;1519601;1519669;1519823;1519650;1519861;1520120;1520294;1520129;1520330;1520586;1520720;1520689;1520873;1520974;1521026;1521168;1521295…
182.134588790743;1518134;1518068;1517987;1517818;1517986;1517737;1517674;1517647;1517931;1517924;1517915;1517688;1517542;1517205;1517296;1517473;1517330;1517312;1517404;1517471;1517328;1517730;1518091;1518045;1518428;1518723;1518815;1518996;1519223;1519218;1519470;1519550;1519600;1519730;1519655;1519931;1520221;1520109;1520269;1520377;1520546;1520635;1520715;1520756;1520995;1521124;1521209;152113…
182.225706429613;1518251;1518130;1518179;1517888;1518071;1517798;1517803;1517824;1517925;1517913;1517884;1517600;1517433;1517513;1517411;1517546;1517414;1517203;1517478;1517637;1517589;1517798;1518101;1518368;1518604;1518756;1518886;1519290;1519400;1519421;1519429;1519663;1519716;1519841;1519819;1520030;1520064;1520230;1520266;1520456;1520712;1520817;1520720;1520840;1521209;1521110;1521278;152137…
182.316804411048;1518343;1518202;1518239;1517984;1517984;1518023;1517836;1517902;1518118;1518133;1517874;1517904;1517724;1517525;1517690;1517722;1517386;1517430;1517547;1517620;1517559;1517980;1518119;1518339;1518544;1518808;1519027;1519338;1519588;1519553;1519550;1519702;1519907;1519842;1519845;1520175;1520348;1520376;1520515;1520587;1520857;1520933;1520966;1520970;1521161;1521203;1521372;152136…
182.407882763524;1518778;1518461;1518459;1518065;1518277;1518210;1518131;1518155;1518198;1518418;1518326;1518123;1517881;1517831;1517926;1517914;1517780;1517689;1517846;1517840;1517859;1518063;1518401;1518600;1518797;1519261;1519173;1519589;1519661;1519740;1519874;1519989;1520068;1520072;1520297;1520326;1520556;1520544;1520756;1520792;1520947;1521214;1521169;1521443;1521383;1521476;1521647;152174…
182.49894151552;1518897;1518539;1518496;1518414;1518564;1518396;1518151;1518343;1518455;1518440;1518404;1518176;1518093;1517974;1517908;1518004;1517844;1517800;1517926;1517961;1518096;1518271;1518628;1518778;1518991;1519259;1519432;1519661;1519821;1519864;1520086;1520199;1520213;1520150;1520265;1520655;1520725;1520855;1520887;1520855;1521223;1521334;1521371;1521461;1521544;1521591;1521823;1521802…
182.589980695513;1518834;1518866;1518653;1518486;1518714;1518525;1518338;1518463;1518462;1518561;1518475;1518302;1518221;1518142;1518029;1518215;1517996;1518040;1518111;1518147;1518179;1518487;1518730;1518807;1519130;1519470;1519560;1519814;1519945;1519941;1520178;1520366;1520292;1520320;1520424;1520637;1520817;1520933;1520947;1521006;1521224;1521412;1521490;1521615;1521896;1521852;1522037;152210…
182.68100033198;1519082;1518822;1518726;1518710;1518807;1518536;1518437;1518537;1518618;1518662;1518646;1518381;1518221;1518191;1518097;1518265;1518131;1518125;1518183;1518106;1518220;1518513;1518751;1518966;1519245;1519437;1519626;1519975;1519989;1520020;1520143;1520369;1520453;1520423;1520472;1520757;1520878;1521014;1521040;1521156;1521345;1521581;1521555;1521648;1521731;1521798;1521797;1522121…
182.772000453398;1519170;1519250;1518945;1518661;1518901;1518753;1518553;1518875;1518776;1518778;1518732;1518637;1518486;1518272;1518307;1518289;1518274;1518186;1518412;1518435;1518364;1518604;1518962;1519092;1519369;1519673;1519843;1520092;1520273;1520117;1520401;1520502;1520633;1520630;1520726;1520864;1521031;1521302;1521257;1521358;1521404;1521656;1521789;1521772;1521966;1522117;1522105;152220…
182.862981088246;1519189;1519104;1518934;1518812;1518972;1518788;1518556;1518837;1518892;1518946;1518913;1518688;1518468;1518181;1518319;1518512;1518241;1518391;1518461;1518404;1518359;1518684;1518904;1519232;1519396;1519656;1519822;1520172;1520445;1520329;1520593;1520643;1520698;1520766;1520715;1520861;1521090;1521401;1521367;1521322;1521627;1521864;1521899;1521866;1522027;1522249;1522157;152228…
182.953942265;1519486;1519421;1519180;1519023;1519296;1518987;1518908;1518966;1519082;1519079;1519176;1518789;1518607;1518529;1518678;1518798;1518508;1518585;1518591;1518583;1518634;1518911;1519157;1519341;1519597;1519878;1520005;1520375;1520534;1520523;1520712;1520821;1521033;1520982;1521016;1521156;1521331;1521503;1521403;1521696;1521789;1521920;1521875;1522223;1522283;1522295;1522377;1522544;1…
183.044884012138;1519470;1519410;1519245;1519119;1519200;1518821;1518759;1519014;1519068;1519203;1518976;1518772;1518731;1518421;1518590;1518695;1518526;1518587;1518577;1518605;1518691;1518982;1519216;1519431;1519576;1520035;1520101;1520312;1520500;1520376;1520685;1520763;1520956;1520799;1520935;1521141;1521327;1521493;1521467;1521559;1521723;1522080;1521998;1522183;1522305;1522243;1522535;152251…
183.135806358138;1519602;1519244;1519358;1519076;1519318;1519051;1518928;1519166;1519156;1519282;1519275;1518924;1518790;1518694;1518839;1518798;1518764;1518688;1518626;1518668;1518766;1519045;1519205;1519477;1519776;1520032;1520009;1520466;1520784;1520624;1520678;1520926;1521027;1520977;1521080;1521135;1521500;1521689;1521675;1521755;1522049;1522170;1522170;1522242;1522451;1522522;1522711;152257…
183.226709331476;1519852;1519725;1519558;1519404;1519639;1519368;1519236;1519348;1519407;1519572;1519394;1519374;1519130;1519008;1518992;1518961;1518917;1519011;1518977;1518868;1519057;1519405;1519619;1519806;1520106;1520370;1520463;1520806;1520805;1520863;1521068;1521230;1521284;1521308;1521386;1521600;1521619;1521866;1521836;1522048;1522204;1522365;1522360;1522564;1522655;1522619;1522826;152292…
183.317592960631;1519924;1519862;1519725;1519497;1519755;1519385;1519514;1519551;1519644;1519698;1519518;1519369;1519147;1519241;1519170;1519280;1519179;1519072;1519079;1519082;1519153;1519491;1519663;1519917;1520227;1520595;1520707;1521058;1521095;1521021;1521186;1521319;1521447;1521584;1521598;1521723;1521839;1522130;1522089;1522264;1522429;1522548;1522544;1522793;1522748;1522907;1523008;152300…
183.40845727408;1520037;1519926;1519894;1519606;1519695;1519503;1519569;1519680;1519690;1519811;1519614;1519338;1519265;1519287;1519146;1519272;1519205;1519007;1519194;1519136;1519340;1519457;1519887;1519998;1520357;1520624;1520739;1520978;1521268;1521219;1521321;1521317;1521536;1521533;1521449;1521725;1521942;1522124;1522150;1522292;1522337;1522522;1522546;1522786;1522912;1522886;1523115;1523147…
183.4993023003;1520229;1520059;1519939;1519737;1519963;1519637;1519577;1519660;1519900;1519799;1519632;1519500;1519274;1519316;1519249;1519344;1519377;1519181;1519212;1519199;1519312;1519630;1519942;1520087;1520346;1520705;1520783;1521059;1521237;1521332;1521537;1521477;1521694;1521593;1521750;1521807;1521951;1522087;1522214;1522451;1522397;1522765;1522649;1522867;1522980;1523112;1523361;1523295;…
183.590128067768;1520239;1520076;1520081;1519735;1520019;1519832;1519862;1519773;1519931;1519926;1519851;1519597;1519493;1519423;1519515;1519455;1519219;1519331;1519535;1519389;1519566;1519699;1519987;1520193;1520550;1520895;1520901;1521176;1521467;1521382;1521554;1521700;1521681;1521650;1521678;1521923;1522190;1522434;1522457;1522392;1522746;1522831;1522852;1522976;1523114;1523277;1523265;152342…
183.680934604963;1520409;1520333;1520064;1520050;1520215;1520029;1519881;1520005;1520047;1520138;1520151;1519953;1519785;1519632;1519710;1519764;1519594;1519495;1519748;1519645;1519801;1519978;1520255;1520461;1520657;1520981;1521025;1521290;1521726;1521487;1521580;1522021;1521877;1521945;1521910;1522186;1522347;1522554;1522525;1522744;1522737;1523064;1523072;1523248;1523393;1523438;1523525;152369…
183.771721940361;1520505;1520491;1520368;1520050;1520375;1520234;1519904;1520141;1520163;1520250;1520212;1519998;1519834;1519596;1519741;1519889;1519683;1519628;1519744;1519695;1519985;1520110;1520328;1520602;1520851;1521163;1521263;1521602;1521811;1521779;1521804;1521938;1522103;1522203;1522261;1522264;1522598;1522659;1522640;1522727;1523049;1523175;1523256;1523383;1523336;1523490;1523569;152371…
183.86249010244;1520841;1520616;1520430;1520336;1520577;1520287;1520187;1520226;1520266;1520436;1520409;1520025;1519952;1519901;1519935;1519960;1519802;1519798;1519910;1519897;1519903;1520344;1520420;1520635;1520876;1521331;1521369;1521659;1521992;1521930;1522015;1522052;1522374;1522255;1522254;1522575;1522525;1522832;1522829;1523042;1523102;1523319;1523203;1523444;1523584;1523607;1523818;1523769…
183.953239119677;1520879;1520865;1520676;1520405;1520618;1520478;1520343;1520390;1520533;1520461;1520531;1520372;1520190;1520092;1520073;1520216;1519968;1519925;1520094;1520049;1520199;1520400;1520660;1520980;1521082;1521380;1521488;1521839;1522045;1522078;1522166;1522314;1522382;1522394;1522492;1522644;1522801;1523007;1522971;1523217;1523226;1523466;1523519;1523614;1523886;1523825;1524032;152406…
184.043969020551;1520848;1520683;1520546;1520464;1520563;1520485;1520256;1520436;1520436;1520353;1520353;1520368;1520103;1519976;1520117;1520157;1520134;1519953;1519954;1520047;1520124;1520402;1520615;1520894;1521152;1521472;1521587;1521815;1521804;1521982;1522039;1522100;1522477;1522335;1522409;1522652;1522845;1523130;1523124;1523113;1523377;1523512;1523469;1523560;1523600;1523757;1524018;152400…
184.134679833537;1521045;1520972;1520904;1520694;1520745;1520448;1520408;1520686;1520620;1520654;1520619;1520412;1520244;1520067;1520196;1520204;1520081;1520119;1520267;1520187;1520248;1520417;1520789;1520913;1521265;1521754;1521585;1522033;1522065;1522145;1522221;1522377;1522525;1522753;1522505;1522657;1522861;1523164;1523099;1523190;1523360;1523673;1523573;1523784;1523951;1523890;1524181;152418…
184.225371587115;1521279;1521059;1521001;1520697;1520885;1520733;1520719;1520709;1520928;1520964;1520850;1520549;1520527;1520341;1520309;1520379;1520357;1520216;1520355;1520297;1520353;1520681;1520956;1521188;1521501;1521811;1522011;1522214;1522296;1522325;1522461;1522772;1522762;1522747;1522650;1522904;1523192;1523295;1523354;1523381;1523547;1523772;1523760;1523723;1524151;1524292;1524340;152435…
184.31604430976;1521268;1521195;1521005;1520949;1520973;1520946;1520751;1520848;1520776;1520997;1520870;1520578;1520515;1520424;1520483;1520708;1520496;1520426;1520380;1520408;1520580;1520856;1520980;1521251;1521516;1521883;1522050;1522254;1522399;1522398;1522571;1522787;1522842;1522787;1522897;1522942;1523220;1523387;1523328;1523675;1523643;1523905;1523983;1524051;1524124;1524467;1524478;1524418…
184.406698029951;1521724;1521558;1521346;1521327;1521442;1521284;1521106;1521273;1521211;1521455;1521277;1521125;1521021;1520984;1520837;1521005;1520828;1520795;1520846;1520804;1520913;1521152;1521421;1521583;1521764;1522323;1522253;1522644;1522719;1522806;1523043;1523114;1523110;1523109;1523148;1523471;1523604;1523730;1523930;1524032;1524069;1524233;1524356;1524529;1524560;1524756;1524822;152504…
184.497332776165;1521484;1521551;1521348;1521202;1521439;1521157;1521066;1521115;1521200;1521260;1521133;1520949;1520832;1520626;1520770;1520794;1520555;1520719;1520752;1520695;1520750;1521174;1521425;1521598;1521875;1522178;1522203;1522532;1522776;1522699;1522940;1523116;1523107;1523183;1523159;1523378;1523424;1523776;1523849;1523918;1524142;1524198;1524254;1524388;1524537;1524626;1524716;152480…
184.58794857688;1521767;1521602;1521448;1521305;1521442;1521137;1521122;1521201;1521369;1521328;1521310;1521093;1520934;1520796;1520893;1520903;1520724;1520798;1520759;1520797;1520822;1521264;1521514;1521577;1522083;1522194;1522250;1522581;1522905;1522709;1522818;1523151;1523176;1523201;1523333;1523458;1523600;1523723;1523824;1524042;1523959;1524347;1524368;1524521;1524558;1524707;1524838;1524785…
184.678545460572;1521741;1521809;1521644;1521416;1521590;1521400;1521213;1521326;1521477;1521607;1521346;1521285;1521128;1520930;1520952;1521097;1520893;1521086;1521006;1521035;1521167;1521320;1521574;1521920;1522138;1522356;1522555;1522788;1522814;1523018;1523034;1523349;1523319;1523211;1523369;1523590;1523743;1524010;1523963;1524080;1524284;1524613;1524476;1524678;1524792;1524724;1524935;152489…
184.76912345572;1521977;1521898;1521793;1521430;1521641;1521436;1521495;1521568;1521542;1521627;1521443;1521325;1521149;1521047;1521009;1521220;1521023;1521038;1521035;1520959;1521154;1521535;1521720;1521797;1522190;1522567;1522658;1522819;1522888;1522994;1523163;1523376;1523557;1523381;1523551;1523657;1523858;1523982;1524078;1524135;1524240;1524537;1524569;1524718;1524810;1524979;1525055;1524960…
184.859682590801;1522141;1522134;1521794;1521753;1522040;1521706;1521602;1521660;1521665;1521887;1521742;1521631;1521477;1521243;1521275;1521340;1521225;1521100;1521175;1521164;1521365;1521626;1521982;1522046;1522375;1522792;1522823;1523191;1523278;1523236;1523348;1523507;1523708;1523766;1523740;1523987;1524023;1524284;1524277;1524315;1524548;1524851;1524810;1524885;1525123;1525113;1525230;152526…
184.950222894291;1522254;1522072;1521935;1521869;1522096;1521931;1521830;1521835;1521877;1521847;1521782;1521537;1521419;1521366;1521486;1521422;1521410;1521259;1521366;1521351;1521441;1521882;1522053;1522147;1522590;1522732;1522879;1523152;1523474;1523520;1523501;1523721;1523762;1523849;1523803;1524050;1524231;1524304;1524350;1524507;1524785;1524829;1524879;1525083;1525145;1525210;1525369;152547…
185.04074439467;1522226;1522107;1521976;1521752;1521838;1521641;1521667;1521797;1521896;1521911;1521814;1521626;1521396;1521528;1521392;1521384;1521357;1521358;1521372;1521421;1521401;1521849;1521975;1522134;1522392;1522816;1522839;1523039;1523334;1523439;1523500;1523674;1523557;1523711;1523663;1523952;1523995;1524251;1524389;1524447;1524637;1524841;1524871;1524887;1525065;1525085;1525292;1525296…
185.131247120414;1522471;1522294;1522329;1522124;1522376;1521930;1522070;1522091;1522136;1522114;1522088;1521823;1521655;1521557;1521712;1521689;1521557;1521583;1521584;1521724;1521704;1521984;1522257;1522418;1522762;1523041;1523094;1523510;1523650;1523590;1523730;1523887;1523978;1524094;1523994;1524231;1524369;1524646;1524664;1524767;1524947;1525079;1525075;1525120;1525408;1525614;1525573;152552…
185.2217311;1522603;1522350;1522367;1522083;1522330;1522140;1522017;1521982;1522249;1522083;1522133;1521816;1521665;1521731;1521663;1521724;1521736;1521619;1521680;1521620;1521634;1521994;1522309;1522547;1522604;1523208;1523327;1523514;1523536;1523644;1523755;1523957;1524015;1524089;1524080;1524317;1524481;1524663;1524700;1524774;1524958;1525197;1525232;1525306;1525365;1525540;1525667;1525758;152…
185.312196361906;1522420;1522274;1522251;1522066;1522264;1522031;1521945;1522111;1522164;1522096;1521961;1521633;1521589;1521615;1521703;1521599;1521541;1521491;1521571;1521553;1521713;1522037;1522216;1522416;1522648;1523043;1523189;1523372;1523560;1523522;1523660;1523957;1524034;1523939;1524085;1524333;1524416;1524621;1524649;1524640;1524782;1525195;1525006;1525118;1525285;1525400;1525653;152571…
185.40264293461;1522655;1522593;1522325;1522096;1522381;1522146;1522101;1522266;1522211;1522354;1522264;1521996;1522014;1521848;1521833;1521996;1521827;1521676;1521846;1521746;1521939;1522179;1522283;1522527;1522948;1523315;1523401;1523637;1523704;1523709;1524006;1524007;1524169;1523998;1524318;1524451;1524544;1524919;1524880;1525034;1525110;1525341;1525167;1525406;1525468;1525598;1525756;1525840…
185.493070846588;1522861;1522667;1522419;1522380;1522411;1522542;1522183;1522253;1522503;1522569;1522297;1522232;1521989;1522001;1521891;1522006;1521775;1521784;1522007;1521979;1521945;1522479;1522611;1522877;1523047;1523289;1523427;1523812;1524052;1523883;1524074;1524301;1524361;1524287;1524266;1524601;1524701;1524954;1525005;1524921;1525157;1525380;1525329;1525648;1525736;1525770;1525909;152600…
185.583480126319;1522768;1522636;1522625;1522322;1522656;1522312;1522284;1522325;1522380;1522434;1522472;1522102;1522041;1521943;1521879;1522100;1521897;1521855;1521971;1521885;1522076;1522332;1522494;1522868;1522977;1523349;1523328;1523687;1523762;1523945;1524081;1524307;1524386;1524402;1524363;1524633;1524753;1524864;1524920;1525057;1525338;1525396;1525377;1525544;1525719;1525756;1525949;152590…
185.67387080228;1523070;1522923;1522732;1522704;1522739;1522640;1522593;1522575;1522693;1522701;1522634;1522414;1522200;1522152;1522208;1522282;1522310;1522171;1522245;1522195;1522267;1522430;1522802;1522923;1523358;1523620;1523672;1524047;1524101;1524162;1524286;1524513;1524483;1524592;1524658;1524822;1524986;1525119;1525206;1525325;1525600;1525740;1525608;1525844;1526024;1526030;1526285;1526261…
185.764242902948;1523162;1523189;1522990;1522677;1522997;1522670;1522797;1522792;1522918;1522854;1522813;1522463;1522453;1522206;1522317;1522430;1522432;1522251;1522301;1522326;1522481;1522871;1523012;1523169;1523403;1523735;1523823;1524070;1524314;1524378;1524523;1524734;1524718;1524810;1524816;1525001;1525300;1525460;1525411;1525564;1525622;1525948;1525970;1526013;1526191;1526293;1526542;152651…
185.8545964568;1523204;1523174;1522891;1522869;1523154;1522809;1522832;1522852;1522911;1522948;1522864;1522704;1522503;1522403;1522452;1522526;1522443;1522331;1522510;1522367;1522594;1522761;1523125;1523359;1523594;1523884;1524138;1524315;1524572;1524551;1524619;1524918;1524799;1524862;1524910;1525088;1525293;1525539;1525515;1525736;1525854;1525943;1526010;1526146;1526292;1526489;1526538;1526405;…
185.944931492315;1523587;1523238;1522899;1522919;1523152;1522847;1522832;1523077;1523015;1523002;1522885;1522735;1522519;1522384;1522579;1522573;1522415;1522396;1522656;1522575;1522611;1522834;1523069;1523191;1523568;1524047;1523904;1524247;1524573;1524505;1524713;1524824;1524911;1524892;1524883;1525221;1525249;1525559;1525576;1525722;1525838;1526077;1526062;1526114;1526225;1526377;1526554;152643…
186.035248037969;1523478;1523366;1523221;1522943;1523177;1523114;1522867;1523004;1523090;1523220;1523070;1522842;1522774;1522692;1522637;1522697;1522652;1522633;1522593;1522569;1522728;1522896;1523112;1523422;1523727;1524060;1524131;1524562;1524697;1524669;1524738;1524944;1524910;1524932;1525094;1525295;1525351;1525657;1525746;1525810;1526029;1526133;1526211;1526320;1526539;1526505;1526731;152667…
186.12554612224;1523545;1523387;1523305;1523049;1523365;1523091;1523120;1523188;1523131;1523331;1523071;1522862;1522757;1522747;1522642;1522805;1522720;1522515;1522861;1522732;1522604;1523080;1523487;1523434;1523887;1524070;1524189;1524550;1524858;1524779;1524801;1525118;1525130;1525085;1525076;1525401;1525548;1525839;1525855;1525865;1526009;1526342;1526337;1526437;1526549;1526627;1526776;1526752…
186.215825773605;1523951;1523673;1523438;1523222;1523522;1523385;1523225;1523283;1523546;1523486;1523370;1523042;1522940;1522904;1522890;1522941;1522916;1522856;1522970;1523018;1522980;1523334;1523515;1523838;1524108;1524313;1524334;1524737;1525007;1525030;1525020;1525247;1525344;1525379;1525514;1525634;1525855;1525949;1525913;1526063;1526231;1526592;1526478;1526519;1526934;1526791;1527063;152706…
186.306087020543;1523851;1523930;1523647;1523727;1523774;1523557;1523431;1523572;1523767;1523711;1523568;1523450;1523073;1522958;1523254;1523274;1523150;1522919;1523406;1523174;1523129;1523557;1523805;1524069;1524327;1524652;1524635;1525041;1525193;1525145;1525198;1525471;1525499;1525544;1525487;1526018;1525943;1526131;1526260;1526268;1526496;1526544;1526722;1526895;1527044;1526962;1527162;152719…
186.396329891529;1524153;1524141;1523870;1523493;1523797;1523642;1523460;1523761;1523697;1523721;1523650;1523578;1523382;1523285;1523280;1523406;1523258;1523163;1523370;1523110;1523242;1523639;1523728;1524073;1524290;1524733;1524777;1525155;1525288;1525251;1525466;1525643;1525631;1525760;1525721;1525959;1526143;1526392;1526279;1526393;1526627;1526845;1526713;1527010;1527183;1527298;1527380;152740…
186.486554415043;1524042;1523938;1523861;1523557;1523846;1523682;1523519;1523729;1523836;1523787;1523786;1523481;1523334;1523284;1523248;1523400;1523232;1523182;1523285;1523400;1523309;1523768;1523909;1524136;1524470;1524709;1524741;1525243;1525472;1525375;1525397;1525612;1525641;1525692;1525797;1526121;1526146;1526322;1526455;1526427;1526501;1527073;1526837;1527082;1527241;1527422;1527523;152734…
186.57676061956;1524329;1524151;1524007;1523789;1524088;1523702;1523637;1523772;1523819;1523989;1523868;1523644;1523593;1523350;1523380;1523565;1523390;1523215;1523375;1523512;1523422;1523864;1524096;1524145;1524542;1524804;1524998;1525222;1525476;1525363;1525492;1525750;1525834;1525877;1526035;1526166;1526161;1526636;1526548;1526678;1526875;1527088;1526981;1527056;1527321;1527404;1527606;1527575…
186.666948533559;1524506;1524453;1524327;1524075;1524285;1524198;1523986;1524190;1524285;1524115;1524256;1523956;1523836;1523614;1523683;1523686;1523669;1523503;1523743;1523577;1523793;1524150;1524483;1524580;1524839;1525176;1525310;1525572;1525697;1525638;1525904;1526070;1526077;1526113;1526297;1526467;1526676;1526819;1526858;1526941;1527095;1527454;1527206;1527517;1527631;1527640;1527836;152795…
186.757118185517;1524577;1524331;1524285;1524109;1524391;1524136;1524056;1524166;1524264;1524232;1524138;1523970;1523824;1523655;1523752;1523781;1523665;1523529;1523815;1523697;1523838;1524014;1524338;1524659;1524835;1525099;1525314;1525647;1525780;1525727;1525931;1525962;1526230;1526181;1526074;1526462;1526581;1526769;1526951;1526967;1527076;1527351;1527342;1527557;1527661;1527726;1527853;152793…
186.847269603912;1524799;1524740;1524460;1524291;1524534;1524244;1524268;1524261;1524299;1524411;1524429;1524133;1524079;1523782;1523929;1523929;1523907;1523730;1524082;1523807;1523925;1524289;1524432;1524822;1525151;1525363;1525495;1525676;1525997;1525912;1526080;1526355;1526375;1526334;1526437;1526680;1526908;1526854;1527160;1527219;1527233;1527375;1527524;1527672;1527884;1527931;1527958;152814…
186.93740281722;1525024;1524833;1524704;1524436;1524921;1524424;1524333;1524516;1524501;1524561;1524535;1524198;1524240;1524022;1524156;1524159;1524099;1524006;1524053;1523983;1524209;1524508;1524767;1524821;1525140;1525445;1525643;1525927;1526088;1526041;1526361;1526400;1526634;1526519;1526446;1526810;1526954;1527141;1527223;1527302;1527438;1527718;1527825;1527890;1528018;1528123;1528185;1528176…
187.02751785392;1524974;1524919;1524646;1524526;1524709;1524544;1524395;1524519;1524660;1524618;1524545;1524353;1524050;1524101;1524101;1524237;1524127;1523956;1524199;1524076;1524285;1524591;1524848;1524873;1525344;1525724;1525756;1526091;1526125;1526138;1526399;1526462;1526710;1526687;1526692;1526908;1526921;1527074;1527291;1527433;1527652;1527780;1527813;1527829;1527963;1528252;1528264;1528155…
187.117614742489;1525096;1525023;1524862;1524745;1524944;1524721;1524728;1524853;1524748;1524694;1524781;1524656;1524463;1524317;1524284;1524384;1524330;1524145;1524274;1524378;1524459;1524759;1524834;1525355;1525599;1525894;1525805;1526196;1526463;1526372;1526520;1526691;1526709;1526873;1526893;1527213;1527312;1527526;1527483;1527731;1527904;1527977;1527888;1528023;1528412;1528315;1528501;152853…
187.207693511404;1525263;1525305;1525044;1524881;1525169;1524953;1524891;1525043;1524949;1525142;1524965;1524707;1524647;1524440;1524582;1524676;1524583;1524467;1524566;1524542;1524582;1524881;1525277;1525606;1525659;1526060;1526096;1526498;1526653;1526565;1526744;1527033;1526896;1526948;1527101;1527292;1527440;1527665;1527770;1527790;1527899;1528159;1528223;1528269;1528516;1528757;1528753;152887…
187.297754189142;1525513;1525307;1525248;1524993;1525242;1525072;1524942;1524917;1525277;1525060;1525164;1524753;1524792;1524634;1524660;1524858;1524771;1524570;1524597;1524695;1524714;1524942;1525279;1525527;1525934;1526198;1526280;1526582;1526813;1526707;1526872;1527085;1527195;1527180;1527332;1527420;1527613;1527876;1527779;1528124;1528179;1528382;1528316;1528566;1528522;1528767;1528895;152887…
187.387796804182;1525459;1525686;1525455;1525257;1525564;1525187;1525057;1525338;1525386;1525400;1525255;1525015;1524830;1524863;1524816;1524856;1524735;1524736;1524774;1524865;1524976;1525170;1525560;1525741;1526009;1526415;1526515;1526716;1526912;1526793;1527018;1527222;1527358;1527230;1527503;1527629;1527848;1528086;1528125;1528229;1528343;1528577;1528421;1528743;1528878;1528856;1529112;152908…
187.477821385;1526006;1525735;1525674;1525685;1525723;1525447;1525412;1525540;1525506;1525762;1525594;1525218;1525255;1525132;1525142;1525183;1525023;1525010;1525110;1525104;1525245;1525633;1525731;1525966;1526148;1526566;1526679;1526933;1527199;1527088;1527156;1527507;1527635;1527596;1527610;1527856;1528089;1528217;1528362;1528556;1528558;1528688;1528749;1528938;1529133;1529043;1529302;1529329;1…
187.567827960074;1525917;1525886;1525811;1525593;1525805;1525391;1525452;1525691;1525625;1525581;1525447;1525416;1525276;1525110;1525179;1525103;1525106;1525091;1525164;1525090;1525092;1525474;1525861;1525959;1526245;1526688;1526720;1527138;1527189;1527226;1527466;1527574;1527735;1527679;1527656;1528011;1528064;1528195;1528453;1528293;1528705;1528825;1528930;1528951;1529042;1529223;1529298;152936…
187.657816557882;1526149;1526064;1525836;1525720;1525971;1525587;1525527;1525597;1525816;1525838;1525686;1525614;1525457;1525192;1525354;1525376;1525260;1525291;1525355;1525370;1525322;1525719;1525936;1526215;1526579;1526813;1526909;1527150;1527377;1527415;1527595;1527699;1527861;1527808;1527808;1528209;1528152;1528462;1528535;1528700;1528817;1529076;1529054;1529077;1529381;1529323;1529619;152963…
187.7477872069;1526262;1526032;1526046;1525867;1526016;1525667;1525731;1525925;1526024;1525855;1525889;1525657;1525515;1525296;1525428;1525445;1525296;1525278;1525334;1525464;1525456;1525785;1526191;1526317;1526535;1526965;1526921;1527273;1527567;1527492;1527647;1527784;1527897;1527717;1527754;1528249;1528488;1528523;1528663;1528740;1528876;1529090;1528956;1529317;1529449;1529551;1529516;1529556;…
187.837739935607;1526403;1526340;1525985;1525848;1526177;1525827;1525693;1525935;1525996;1526040;1525858;1525650;1525540;1525395;1525548;1525744;1525274;1525403;1525482;1525573;1525606;1525839;1526013;1526329;1526687;1526839;1527129;1527490;1527519;1527637;1527680;1527877;1528095;1527957;1527953;1528290;1528362;1528670;1528782;1528772;1528949;1529169;1529321;1529276;1529614;1529565;1529819;152975…
187.92767477248;1526656;1526540;1526375;1526242;1526390;1526114;1526091;1526112;1526218;1526310;1526213;1526049;1525920;1525744;1525649;1525839;1525667;1525598;1525782;1525713;1525818;1526333;1526379;1526589;1526859;1527189;1527379;1527636;1527939;1527824;1527997;1528127;1528329;1528238;1528233;1528543;1528727;1528876;1528919;1529060;1529238;1529549;1529430;1529557;1529908;1529809;1529936;1530064…
188.017591745996;1526846;1526698;1526447;1526284;1526439;1526212;1526138;1526380;1526292;1526464;1526385;1525935;1525915;1525774;1525881;1525942;1525796;1525720;1525690;1525751;1525895;1526188;1526464;1526563;1526936;1527322;1527407;1527697;1527870;1527971;1528104;1528271;1528393;1528424;1528435;1528676;1528884;1528885;1529090;1529200;1529396;1529599;1529580;1529748;1529892;1529887;1530039;153015…
188.107490884632;1526790;1526669;1526424;1526262;1526375;1526201;1526005;1526214;1526301;1526573;1526353;1526019;1525850;1525906;1525934;1525944;1525833;1525743;1525852;1525926;1525945;1526249;1526418;1526772;1526893;1527312;1527551;1527787;1527996;1528069;1528034;1528257;1528466;1528388;1528530;1528606;1528781;1528917;1529011;1529213;1529366;1529667;1529535;1529662;1529938;1529889;1530039;152998…
188.197372216867;1526805;1526878;1526704;1526340;1526658;1526468;1526364;1526557;1526427;1526510;1526567;1526392;1526214;1526125;1525986;1526232;1526080;1525998;1526054;1525970;1526187;1526463;1526752;1526886;1527204;1527539;1527681;1527918;1528106;1527996;1528289;1528390;1528416;1528572;1528629;1528734;1528989;1529028;1529143;1529320;1529505;1529775;1529721;1529950;1530030;1530151;1530190;153042…
188.287235771177;1527160;1527027;1526794;1526521;1526937;1526579;1526426;1526708;1526688;1526832;1526666;1526356;1526192;1526141;1526128;1526340;1526037;1525986;1526165;1526273;1526287;1526598;1526998;1527174;1527319;1527667;1527643;1528071;1528289;1528245;1528477;1528670;1528685;1528745;1528745;1529039;1529274;1529292;1529386;1529615;1529638;1529876;1529973;1530200;1530207;1530257;1530412;153057…
188.37708157604;1527251;1527128;1526862;1526811;1526979;1526732;1526659;1526765;1526858;1526887;1526812;1526381;1526459;1526264;1526486;1526568;1526233;1526213;1526439;1526358;1526391;1526855;1527090;1527209;1527447;1527809;1527977;1528286;1528377;1528559;1528738;1528900;1528852;1528868;1528915;1529015;1529285;1529648;1529582;1529796;1529755;1530072;1530164;1530302;1530366;1530542;1530614;1530650…
188.466909659933;1527605;1527143;1526990;1526916;1527101;1526945;1526744;1526874;1527048;1527123;1526876;1526807;1526639;1526384;1526535;1526474;1526476;1526383;1526477;1526478;1526504;1526861;1527040;1527297;1527831;1527957;1528005;1528479;1528563;1528650;1528725;1529101;1528923;1528927;1528952;1529213;1529402;1529783;1529791;1529823;1529889;1530276;1530232;1530327;1530536;1530568;1530760;153070…
188.556720051335;1527688;1527484;1527494;1527262;1527268;1527030;1527180;1527167;1527301;1527429;1527306;1526906;1526819;1526691;1526777;1526855;1526789;1526629;1526885;1526714;1526823;1527132;1527545;1527614;1527943;1528362;1528580;1528616;1528865;1528886;1529109;1529325;1529372;1529245;1529297;1529700;1529759;1529923;1530044;1530193;1530229;1530498;1530500;1530648;1530938;1530949;1531070;153119…
188.646512778721;1527908;1527595;1527479;1527233;1527476;1527171;1527155;1527247;1527355;1527301;1527313;1527002;1527010;1526768;1527070;1526971;1526779;1526816;1526926;1526953;1527018;1527215;1527509;1527757;1527874;1528383;1528411;1528726;1529076;1529015;1529273;1529307;1529488;1529455;1529419;1529831;1529939;1530376;1530152;1530213;1530337;1530730;1530869;1530886;1531020;1531162;1531112;153123…
188.736287870571;1527930;1527702;1527663;1527376;1527726;1527454;1527437;1527405;1527587;1527437;1527556;1527290;1527088;1527159;1526961;1527177;1526917;1526897;1526949;1526899;1527052;1527343;1527674;1527952;1528134;1528593;1528575;1529010;1529066;1529101;1529315;1529364;1529518;1529547;1529749;1529709;1530118;1530301;1530275;1530386;1530532;1530781;1530785;1530965;1531038;1531203;1531402;153128…
188.82604535536;1528296;1528148;1528064;1527802;1528045;1527763;1527641;1527685;1527948;1527764;1527849;1527473;1527395;1527448;1527196;1527399;1527299;1527268;1527409;1527357;1527506;1527783;1527971;1528179;1528491;1528835;1529007;1529166;1529465;1529569;1529641;1529859;1529923;1529942;1530021;1530379;1530265;1530492;1530559;1530775;1530957;1531147;1531107;1531290;1531453;1531643;1531649;1531587…
188.915785261567;1528466;1528341;1528309;1527856;1528322;1527894;1528002;1528173;1528158;1528246;1528001;1527795;1527623;1527488;1527531;1527785;1527540;1527443;1527782;1527633;1527720;1528094;1528263;1528530;1528743;1529057;1529286;1529546;1529887;1529782;1529886;1530088;1530106;1530157;1530287;1530447;1530601;1530900;1530916;1531103;1531213;1531276;1531476;1531466;1531748;1531814;1532110;153209…
189.005507617669;1528732;1528581;1528216;1528024;1528124;1528128;1528050;1528263;1528131;1528256;1528081;1527861;1527684;1527597;1527658;1527721;1527611;1527642;1527779;1527562;1527721;1528152;1528325;1528536;1528951;1529137;1529345;1529570;1529760;1529865;1529799;1530178;1530344;1530300;1530317;1530543;1530701;1530961;1530984;1531108;1531311;1531433;1531566;1531681;1531821;1531758;1531937;153185…
189.095212452144;1528910;1528832;1528649;1528399;1528741;1528426;1528393;1528433;1528533;1528476;1528592;1528207;1528219;1528069;1528093;1528015;1528087;1527882;1528034;1527919;1528233;1528492;1528623;1528932;1529105;1529577;1529639;1529981;1530301;1530198;1530285;1530454;1530682;1530622;1530656;1531299;1531030;1531467;1531393;1531430;1531489;1532131;1531869;1531844;1532175;1532234;1532364;153239…
189.184899793468;1529170;1529023;1528780;1528607;1528800;1528580;1528449;1528634;1528585;1528710;1528651;1528487;1528262;1528116;1528219;1528394;1528229;1527959;1528246;1528319;1528344;1528555;1528765;1529099;1529336;1529669;1529830;1530232;1530291;1530190;1530397;1530746;1530678;1530860;1530740;1531236;1531203;1531449;1531379;1531612;1531674;1531934;1532018;1532109;1532337;1532381;1532473;153253…
189.27456967012;1529230;1529164;1529063;1528899;1529136;1528804;1528753;1528866;1528875;1528869;1528800;1528498;1528525;1528437;1528376;1528476;1528207;1528257;1528466;1528321;1528440;1528841;1529057;1529324;1529617;1529966;1530170;1530499;1530548;1530643;1530801;1530871;1530960;1530998;1531026;1531237;1531432;1531697;1531694;1531784;1531984;1532173;1532132;1532292;1532562;1532554;1532670;1532775…
189.364222110577;1529492;1529391;1529211;1528989;1529094;1529091;1529000;1529278;1529122;1529063;1528997;1528800;1528733;1528573;1528599;1528706;1528491;1528576;1528568;1528627;1528684;1529042;1529393;1529577;1529689;1530245;1530294;1530587;1530910;1530770;1530991;1531245;1531194;1531179;1531275;1531415;1531670;1531798;1531904;1532087;1532296;1532400;1532438;1532660;1532790;1532764;1533013;153293…
189.453857143316;1529814;1529601;1529446;1529333;1529400;1529170;1529150;1529183;1529327;1529484;1529120;1528906;1528975;1528718;1528875;1528842;1528817;1528585;1528859;1528786;1528958;1529293;1529471;1529747;1530019;1530387;1530503;1530818;1530917;1531018;1531144;1531337;1531382;1531512;1531537;1531777;1531830;1532180;1532282;1532276;1532378;1532553;1532599;1532762;1532852;1533143;1533201;153312…
189.543474796814;1529915;1529676;1529569;1529512;1529628;1529288;1529230;1529491;1529442;1529495;1529384;1529239;1529018;1528848;1528862;1529155;1528932;1528928;1528973;1528915;1529031;1529310;1529789;1529818;1530062;1530564;1530431;1530995;1531140;1531114;1531354;1531531;1531519;1531636;1531600;1531955;1532075;1532406;1532229;1532452;1532639;1532834;1532690;1532838;1533155;1533202;1533297;153343…
189.63307509955;1530186;1530117;1530009;1529764;1529960;1529887;1529626;1529846;1529786;1530070;1529937;1529577;1529499;1529336;1529499;1529604;1529414;1529325;1529448;1529379;1529371;1529797;1530122;1530296;1530541;1530906;1531061;1531326;1531553;1531519;1531845;1531837;1531927;1532073;1532055;1532368;1532467;1532645;1532781;1532753;1533013;1533273;1533326;1533325;1533576;1533595;1533607;1533910…
189.72265808;1530305;1530163;1530111;1529829;1530120;1529713;1529679;1529884;1529928;1529954;1529851;1529642;1529441;1529430;1529463;1529511;1529219;1529218;1529353;1529504;1529499;1529797;1529963;1530356;1530641;1531028;1531231;1531485;1531566;1531582;1531841;1531888;1532087;1531988;1532206;1532299;1532403;1532673;1532686;1532892;1532998;1533266;1533355;1533393;1533800;1533765;1533734;1533823;15…
189.812223766642;1530450;1530385;1530251;1530022;1530364;1530005;1529862;1529873;1530034;1530212;1530065;1529890;1529583;1529582;1529585;1529667;1529489;1529440;1529565;1529469;1529630;1530033;1530242;1530607;1530770;1531225;1531269;1531551;1531773;1531756;1531960;1532163;1532264;1532292;1532338;1532497;1532777;1532907;1532960;1532972;1533215;1533492;1533486;1533495;1533766;1534002;1533952;153399…
189.901772187954;1530724;1530542;1530334;1530093;1530438;1530139;1530058;1530203;1530248;1530316;1530174;1529934;1529734;1529814;1529692;1529750;1529739;1529648;1529829;1529785;1529843;1530032;1530333;1530663;1530907;1531457;1531364;1531702;1531844;1531920;1531941;1532348;1532402;1532440;1532368;1532659;1532785;1532828;1532935;1533113;1533348;1533563;1533543;1533720;1533848;1533957;1534048;153432…
189.991303372412;1531143;1530840;1530790;1530523;1530625;1530501;1530370;1530671;1530670;1530608;1530542;1530330;1530093;1530050;1530099;1530268;1530087;1529966;1530006;1530089;1530110;1530555;1530748;1531040;1531266;1531596;1531617;1532055;1532337;1532322;1532304;1532687;1532787;1532787;1532898;1532980;1533335;1533452;1533416;1533587;1533745;1533939;1533962;1534242;1534354;1534265;1534451;153437…
190.080817348495;1531118;1530968;1530772;1530618;1530824;1530521;1530416;1530483;1530717;1530689;1530684;1530350;1530345;1530006;1530153;1530171;1529995;1530098;1529920;1530095;1530251;1530720;1530899;1531024;1531244;1531799;1531846;1532264;1532278;1532340;1532488;1532768;1532779;1532773;1532831;1533112;1533148;1533479;1533574;1533626;1533823;1533954;1534015;1534196;1534380;1534375;1534528;153454…
190.17031414468;1531434;1531215;1530844;1530764;1530917;1530730;1530537;1530787;1530959;1531003;1530851;1530545;1530344;1530316;1530337;1530404;1530310;1530153;1530271;1530182;1530520;1530699;1530962;1531350;1531515;1531919;1532173;1532286;1532485;1532503;1532624;1532863;1533049;1532929;1533041;1533362;1533357;1533680;1533608;1533789;1534056;1534213;1534301;1534397;1534729;1534565;1534738;1534798…
190.259793789444;1531577;1531368;1531246;1531038;1531218;1531091;1530919;1530969;1531059;1531180;1531079;1530747;1530628;1530556;1530755;1530751;1530611;1530523;1530602;1530507;1530672;1531163;1531322;1531524;1531815;1532190;1532339;1532758;1532827;1532794;1532955;1533210;1533211;1533292;1533449;1533553;1533643;1533990;1533919;1534111;1534200;1534402;1534460;1534719;1534779;1534934;1534988;153517…
190.349256311264;1531845;1531724;1531516;1531157;1531438;1531250;1531153;1531259;1531218;1531493;1531225;1530991;1530877;1530668;1530847;1530789;1530806;1530599;1530639;1530886;1530879;1531179;1531401;1531866;1532039;1532340;1532480;1532892;1532877;1532930;1533215;1533402;1533343;1533512;1533444;1533798;1534011;1534150;1534165;1534379;1534499;1534611;1534801;1534787;1535038;1535115;1535183;153527…
190.438701738619;1532027;1531802;1531753;1531425;1531803;1531439;1531437;1531645;1531445;1531623;1531456;1531358;1531119;1531017;1531145;1531220;1530926;1530993;1531001;1531063;1531068;1531443;1531804;1532001;1532459;1532709;1532891;1533114;1533241;1533170;1533395;1533636;1533815;1533681;1533760;1533985;1534343;1534483;1534441;1534494;1534848;1535002;1535104;1535272;1535298;1535197;1535502;153553…
190.528130099985;1532078;1532073;1531823;1531706;1531950;1531673;1531631;1531682;1531837;1531787;1531811;1531402;1531538;1531286;1531251;1531313;1531130;1531098;1531382;1531254;1531385;1531469;1531874;1532235;1532498;1532942;1532944;1533452;1533563;1533536;1533557;1533763;1533907;1533781;1533886;1534172;1534356;1534571;1534684;1534715;1534839;1535082;1535062;1535370;1535452;1535559;1535838;153579…
190.61754142384;1532224;1532106;1531999;1531768;1532057;1531833;1531663;1531777;1531833;1531874;1531805;1531579;1531425;1531220;1531253;1531444;1531304;1531164;1531274;1531249;1531573;1531777;1532082;1532176;1532566;1533037;1532904;1533480;1533599;1533520;1533694;1533798;1533962;1533972;1534049;1534082;1534543;1534588;1534741;1534977;1534848;1535168;1535084;1535460;1535626;1535566;1535849;1535724…
190.706935738661;1532476;1532263;1532240;1531927;1532294;1531959;1531899;1532012;1532138;1532099;1532048;1531892;1531683;1531481;1531496;1531698;1531495;1531483;1531560;1531492;1531728;1531899;1532318;1532375;1532858;1533096;1533116;1533496;1533747;1533669;1533819;1534060;1534318;1534240;1534325;1534529;1534636;1535027;1534940;1535317;1535154;1535512;1535495;1535579;1535859;1535772;1536020;153599…
190.796313072927;1532723;1532473;1532317;1531903;1532449;1532087;1531997;1532054;1532150;1532231;1532051;1531892;1531791;1531666;1531724;1531786;1531563;1531690;1531697;1531597;1531601;1532149;1532399;1532495;1532954;1533247;1533465;1533766;1533777;1533838;1534079;1534342;1534353;1534421;1534536;1534428;1534866;1535047;1534886;1535298;1535249;1535669;1535410;1535799;1535980;1535974;1536160;153619…
190.885673455113;1532607;1532509;1532414;1532186;1532255;1532274;1532039;1532201;1532292;1532331;1532290;1532099;1531969;1531696;1531755;1531874;1531646;1531724;1531816;1531727;1531893;1532192;1532368;1532666;1533001;1533369;1533321;1533808;1534021;1533930;1534153;1534221;1534409;1534280;1534437;1534649;1534881;1535108;1535049;1535285;1535502;1535790;1535465;1535903;1535944;1536101;1536199;153620…
190.975016913699;1532965;1532932;1532808;1532561;1532615;1532549;1532402;1532496;1532626;1532580;1532640;1532280;1532241;1532033;1532098;1532179;1532036;1531920;1532235;1531956;1531942;1532382;1532767;1533049;1533422;1533712;1533701;1533979;1534326;1534148;1534445;1534686;1534748;1534736;1534760;1535099;1535294;1535371;1535391;1535538;1535835;1536064;1535957;1536195;1536497;1536338;1536640;153648…
191.06434347716;1533187;1533151;1532977;1532681;1532896;1532740;1532466;1532739;1532737;1532838;1532830;1532643;1532376;1532195;1532374;1532362;1532404;1532241;1532232;1532304;1532400;1532634;1533009;1533345;1533603;1533967;1534011;1534367;1534555;1534605;1534797;1534998;1535065;1535002;1535071;1535187;1535517;1535674;1535690;1535966;1535906;1536282;1536359;1536347;1536636;1536515;1536863;1536806…
191.153653173975;1533602;1533357;1533084;1532987;1533203;1533017;1532846;1532947;1532954;1533192;1532820;1532716;1532587;1532413;1532592;1532637;1532401;1532469;1532599;1532573;1532536;1532914;1533097;1533483;1533798;1534084;1534244;1534590;1534757;1534710;1534932;1535117;1535201;1535203;1535321;1535397;1535684;1535952;1535956;1536198;1536224;1536572;1536560;1536647;1536806;1536820;1536874;153701…
191.242946032621;1533868;1533910;1533503;1533368;1533507;1533280;1533114;1533331;1533491;1533602;1533499;1533052;1532868;1532969;1533016;1533007;1532870;1532748;1533055;1532913;1532817;1533272;1533526;1533900;1534020;1534594;1534604;1534979;1535186;1535155;1535393;1535543;1535510;1535586;1535573;1536003;1536030;1536183;1536396;1536438;1536644;1536934;1536865;1536970;1537226;1537257;1537441;153753…
191.332222081576;1534072;1533869;1533869;1533597;1533918;1533720;1533589;1533655;1533765;1533762;1533713;1533428;1533310;1533019;1533144;1533322;1533093;1533020;1533028;1533303;1533293;1533568;1533815;1534084;1534539;1534831;1534914;1535282;1535472;1535436;1535458;1535785;1535823;1535942;1535843;1536072;1536340;1536518;1536702;1536772;1536839;1537140;1537211;1537314;1537537;1537510;1537784;153771…
191.421481349316;1534439;1534191;1534082;1533892;1534092;1533921;1533831;1534037;1533949;1534103;1533926;1533592;1533408;1533421;1533410;1533668;1533307;1533397;1533555;1533454;1533676;1533867;1534123;1534378;1534748;1535223;1535105;1535530;1535799;1535578;1535702;1535983;1536092;1536105;1536141;1536390;1536472;1536860;1536841;1537062;1537282;1537343;1537412;1537592;1537762;1537728;1537993;153800…
191.51072386432;1534693;1534485;1534494;1534254;1534469;1534254;1534085;1534319;1534292;1534348;1534419;1534014;1533721;1533830;1533874;1533925;1533663;1533648;1533768;1533743;1533867;1534273;1534348;1534784;1534977;1535397;1535556;1535960;1536024;1536043;1536206;1536211;1536518;1536458;1536560;1536767;1536842;1537260;1537373;1537346;1537584;1537914;1537775;1537893;1538117;1538138;1538331;1538274…
191.599949655065;1535086;1534638;1534690;1534485;1534515;1534406;1534259;1534586;1534529;1534471;1534484;1534237;1534215;1533903;1533961;1534126;1533935;1533765;1534214;1534061;1534045;1534509;1534646;1534843;1535253;1535595;1535741;1536035;1536306;1536242;1536309;1536626;1536620;1536654;1536761;1536944;1537075;1537384;1537426;1537808;1537909;1537965;1537970;1538291;1538289;1538403;1538588;153841…
191.689158750028;1535327;1535102;1534887;1534839;1534942;1534638;1534528;1534785;1534874;1534848;1534746;1534499;1534429;1534206;1534333;1534335;1534204;1534194;1534241;1534232;1534339;1534540;1535068;1535174;1535561;1535872;1535988;1536234;1536674;1536584;1536777;1537062;1537017;1537049;1537043;1537315;1537488;1537769;1537751;1537954;1538171;1538306;1538281;1538373;1538605;1538666;1538843;153899…
191.778351177686;1535234;1535203;1535095;1535024;1534903;1534796;1534763;1534898;1534965;1534991;1535034;1534566;1534558;1534511;1534466;1534570;1534393;1534244;1534431;1534427;1534532;1534831;1535196;1535197;1535704;1536094;1536081;1536613;1536711;1536549;1536771;1537085;1537083;1537174;1537285;1537561;1537618;1537900;1537835;1538056;1538257;1538682;1538368;1538453;1538729;1538801;1539024;153916…
191.867526966518;1535729;1535520;1535408;1535203;1535382;1535136;1535159;1535167;1535153;1535282;1535236;1534907;1534766;1534651;1534613;1534751;1534687;1534505;1534764;1534645;1534792;1535088;1535434;1535617;1535965;1536373;1536464;1536727;1536899;1536938;1537126;1537246;1537399;1537406;1537388;1537678;1537944;1538063;1538296;1538240;1538484;1538794;1538765;1538777;1539177;1539113;1539310;153937…
191.956686145;1536125;1535859;1535766;1535664;1535733;1535419;1535469;1535625;1535663;1535687;1535442;1535309;1535272;1535009;1535039;1535343;1535130;1535025;1535124;1535003;1535110;1535542;1535700;1536127;1536386;1536710;1536986;1537211;1537399;1537382;1537565;1537787;1537907;1537885;1537809;1538103;1538226;1538480;1538475;1538844;1538920;1539168;1539090;1539271;1539539;1539522;1539593;1539765;1…
192.04582874161;1536259;1535967;1535979;1535792;1535958;1535801;1535583;1535892;1535703;1535959;1535879;1535618;1535280;1535311;1535308;1535302;1535241;1535430;1535226;1535226;1535519;1535675;1535919;1536263;1536561;1536917;1537116;1537460;1537600;1537442;1537739;1538112;1537987;1537940;1538021;1538237;1538391;1538692;1538789;1538961;1539098;1539272;1539242;1539557;1539735;1539676;1539913;1539995…
192.134954784826;1536548;1536450;1536346;1536018;1536278;1536096;1535950;1536034;1536282;1536312;1536299;1535863;1535768;1535683;1535604;1535778;1535555;1535497;1535735;1535598;1535820;1536035;1536301;1536752;1536871;1537269;1537389;1537645;1537782;1538133;1538125;1538322;1538375;1538425;1538391;1538628;1538988;1539066;1539338;1539398;1539404;1539862;1539702;1539852;1539990;1540192;1540292;154029…
192.224064303124;1536860;1536779;1536652;1536340;1536651;1536296;1536303;1536515;1536578;1536525;1536301;1536297;1536002;1535927;1535852;1535956;1535971;1535751;1536009;1536042;1535996;1536366;1536716;1536969;1537200;1537511;1537789;1538029;1538292;1538257;1538424;1538555;1538747;1538616;1538932;1539174;1539058;1539583;1539367;1539521;1539797;1540122;1540001;1540218;1540395;1540510;1540697;154065…
192.313157324983;1537128;1537126;1536961;1536704;1537006;1536713;1536573;1536817;1536833;1536872;1536722;1536461;1536303;1536310;1536268;1536429;1536303;1536122;1536352;1536311;1536320;1536807;1536952;1537224;1537489;1537930;1538031;1538373;1538576;1538603;1538736;1539044;1538974;1539078;1539058;1539255;1539507;1539650;1539900;1539978;1540049;1540316;1540371;1540682;1540735;1540642;1540922;154098…
192.40223387888;1537410;1537381;1537147;1537073;1537175;1536885;1536877;1537046;1537093;1537068;1537071;1536826;1536592;1536454;1536482;1536665;1536369;1536425;1536613;1536478;1536748;1537044;1537127;1537497;1537884;1538198;1538192;1538680;1538886;1538800;1539163;1539160;1539360;1539282;1539320;1539710;1539764;1540078;1540068;1540292;1540393;1540578;1540761;1540801;1541068;1541078;1541098;1541263…
192.491293993292;1537883;1537789;1537507;1537256;1537589;1537323;1537313;1537312;1537399;1537499;1537359;1537173;1536962;1536839;1536941;1536969;1536933;1536770;1536995;1536995;1536860;1537264;1537473;1537908;1538119;1538647;1538634;1539062;1539350;1539166;1539263;1539645;1539832;1539651;1539731;1539945;1540208;1540319;1540369;1540493;1540714;1541083;1540967;1541159;1541469;1541390;1541505;154171…
192.580337696696;1538216;1537997;1537826;1537699;1538041;1537767;1537677;1537716;1537837;1537866;1537814;1537494;1537390;1537185;1537168;1537311;1537290;1537152;1537285;1537134;1537198;1537647;1538000;1538355;1538486;1538961;1539175;1539437;1539617;1539494;1539768;1539879;1540128;1540030;1539938;1540330;1540526;1540735;1540701;1541048;1541189;1541502;1541446;1541528;1541932;1541737;1542109;154197…
192.669365017571;1538483;1538594;1538186;1537999;1538388;1538113;1537938;1538157;1538225;1538278;1538030;1537865;1537856;1537624;1537608;1537746;1537591;1537451;1537638;1537667;1537844;1538294;1538382;1538670;1538992;1539368;1539459;1539770;1539881;1539958;1540076;1540396;1540464;1540514;1540469;1540787;1540845;1541197;1541226;1541317;1541634;1541821;1541811;1541953;1542101;1542231;1542347;154257…
192.758375984393;1538788;1538724;1538574;1538448;1538390;1538314;1538262;1538234;1538584;1538282;1538295;1538172;1538063;1537826;1537852;1537878;1537850;1537735;1537806;1537916;1538005;1538438;1538577;1538841;1539093;1539695;1539771;1540001;1540007;1540123;1540474;1540495;1540616;1540658;1540614;1540973;1541169;1541315;1541481;1541756;1541806;1542054;1542080;1542346;1542434;1542544;1542502;154261…
192.84737062564;1539497;1539474;1539178;1539029;1539096;1538967;1538930;1538971;1538988;1539120;1538875;1538917;1538564;1538450;1538459;1538649;1538397;1538399;1538460;1538508;1538635;1538943;1539222;1539557;1539751;1540223;1540329;1540657;1540959;1540937;1540988;1541290;1541387;1541339;1541367;1541550;1541894;1542204;1542158;1542459;1542363;1542700;1542582;1542692;1543026;1543045;1543320;1543341…
192.936348969789;1539680;1539584;1539489;1539193;1539556;1539143;1539162;1539287;1539355;1539276;1539354;1538954;1538932;1538837;1538707;1538846;1538732;1538678;1538896;1538873;1538980;1539215;1539582;1539687;1540186;1540539;1540545;1540925;1541221;1541267;1541308;1541544;1541479;1541590;1541718;1541944;1542250;1542405;1542404;1542606;1542870;1543041;1542949;1543263;1543338;1543345;1543745;154361…
193.025311045319;1539899;1539817;1539752;1539436;1539727;1539490;1539270;1539565;1539523;1539559;1539471;1539278;1539229;1539033;1539088;1538974;1538997;1538771;1539036;1538943;1539074;1539406;1539647;1540023;1540413;1540737;1540963;1541112;1541505;1541396;1541633;1541862;1541864;1541968;1541799;1542151;1542365;1542562;1542677;1542706;1542954;1543122;1543235;1543328;1543431;1543743;1543868;154375…
193.114256880705;1540309;1540171;1539984;1539797;1540041;1539786;1539734;1539874;1539987;1539990;1539909;1539743;1539531;1539411;1539427;1539517;1539291;1539305;1539442;1539430;1539455;1539760;1540152;1540387;1540716;1541161;1541170;1541604;1541900;1541821;1541944;1542262;1542323;1542331;1542227;1542682;1542745;1542929;1543127;1542990;1543448;1543605;1543720;1543786;1543967;1544143;1544309;154429…
193.203186504427;1540528;1540456;1540294;1540112;1540459;1539934;1539957;1540115;1540184;1540209;1540167;1539946;1539816;1539486;1539577;1539647;1539562;1539628;1539651;1539593;1539800;1540097;1540306;1540605;1541022;1541317;1541344;1541952;1542025;1542073;1542232;1542504;1542500;1542581;1542576;1543001;1543051;1543187;1543367;1543542;1543579;1543980;1543949;1544097;1544256;1544325;1544482;154455…
193.29209994496;1540959;1540959;1540594;1540456;1540839;1540389;1540359;1540487;1540456;1540662;1540535;1540461;1540129;1540067;1540026;1540069;1539988;1539971;1540198;1540249;1540139;1540491;1540677;1541132;1541251;1541656;1541946;1542161;1542475;1542528;1542673;1542806;1542901;1542896;1543034;1543252;1543543;1543815;1543777;1543849;1544036;1544184;1544219;1544432;1544488;1544787;1544988;1545002…
193.380997230783;1541307;1541238;1541054;1540733;1541050;1540759;1540764;1541035;1540828;1541007;1540876;1540628;1540444;1540316;1540496;1540486;1540283;1540237;1540408;1540439;1540444;1540987;1541127;1541464;1541850;1542067;1542162;1542621;1542759;1542848;1542899;1543154;1543260;1543460;1543417;1543630;1543791;1544163;1544286;1544083;1544394;1544615;1544705;1544858;1544913;1545168;1545276;154559…
193.469878390373;1541681;1541573;1541381;1541339;1541363;1541181;1541014;1541383;1541334;1541431;1541209;1541001;1540888;1540715;1540738;1540888;1540797;1540551;1540720;1540665;1540924;1541334;1541568;1541659;1542237;1542470;1542606;1543075;1543067;1543248;1543455;1543627;1543916;1543762;1543590;1543938;1544298;1544458;1544569;1544641;1544621;1545084;1545090;1545261;1545373;1545534;1545598;154567…
193.558743452208;1542197;1541976;1541863;1541658;1541786;1541699;1541535;1541757;1541788;1541847;1541729;1541631;1541440;1541158;1541311;1541338;1541243;1541073;1541198;1541228;1541334;1541673;1542020;1542244;1542783;1542938;1543124;1543438;1543651;1543689;1543878;1543965;1544114;1544183;1544375;1544517;1544616;1544949;1545044;1545176;1545286;1545613;1545630;1545712;1545987;1546009;1546118;154626…
193.647592444764;1542506;1542386;1542304;1541999;1542196;1542152;1541866;1541928;1542136;1542087;1542065;1541930;1541804;1541416;1541661;1541747;1541677;1541479;1541513;1541554;1541693;1541976;1542315;1542547;1542943;1543317;1543492;1543728;1544013;1544057;1544343;1544395;1544518;1544480;1544398;1544839;1545006;1545267;1545372;1545348;1545598;1545971;1545946;1546072;1546203;1546371;1546454;154653…
193.73642539652;1543322;1543071;1543029;1542722;1542962;1542651;1542618;1542648;1542755;1542860;1542788;1542516;1542280;1542055;1542087;1542231;1542045;1542016;1542235;1542144;1542414;1542614;1543053;1543201;1543503;1544062;1544089;1544645;1544696;1544667;1544871;1545135;1545368;1545282;1545339;1545365;1545808;1545946;1546016;1546046;1546271;1546403;1546516;1546705;1546875;1547024;1547162;1547294…
193.825242335953;1544067;1543780;1543501;1543495;1543678;1543361;1543249;1543518;1543437;1543565;1543529;1543133;1543111;1542755;1542937;1543021;1542932;1542737;1542933;1542979;1543065;1543480;1543735;1544127;1544282;1544762;1544805;1545169;1545456;1545462;1545618;1545743;1545895;1545899;1545936;1546291;1546524;1546657;1546656;1546811;1546931;1547260;1547360;1547350;1547733;1547902;1547813;154787…
193.91404329154;1544916;1544697;1544661;1544476;1544733;1544364;1544157;1544490;1544556;1544411;1544510;1543984;1543895;1543749;1543968;1544087;1543871;1543753;1544035;1543943;1544031;1544318;1544793;1545028;1545265;1545729;1545722;1546169;1546295;1546429;1546734;1546877;1546750;1546932;1547015;1547114;1547480;1547582;1547706;1547929;1547821;1548299;1548189;1548401;1548426;1548701;1548941;1548851…
194.002828291758;1546112;1545927;1545626;1545565;1545957;1545593;1545402;1545626;1545610;1545702;1545610;1545386;1545375;1544940;1545096;1545143;1545043;1545077;1545114;1545132;1545334;1545482;1545894;1546081;1546439;1546684;1546985;1547339;1547539;1547625;1547740;1548029;1548153;1547991;1548141;1548313;1548709;1548746;1548908;1549122;1549214;1549387;1549509;1549752;1549815;1549964;1550110;155007…
194.091597365086;1547937;1547656;1547632;1547340;1547683;1547259;1547211;1547325;1547586;1547451;1547409;1547077;1546989;1546787;1546771;1546770;1546749;1546567;1546853;1546903;1547069;1547300;1547558;1547846;1548317;1548708;1548884;1548993;1549272;1549403;1549709;1549927;1549868;1549975;1549859;1550185;1550409;1550708;1550618;1550830;1551129;1551302;1551241;1551592;1551822;1551758;1551848;155199…
194.18035054;1549664;1549430;1549232;1549005;1549175;1548812;1548763;1549127;1549098;1549156;1549132;1548739;1548695;1548530;1548494;1548753;1548510;1548280;1548492;1548504;1548658;1548867;1549287;1549683;1549869;1550460;1550385;1550861;1551154;1551105;1551329;1551486;1551488;1551674;1551674;1551960;1552078;1552383;1552443;1552539;1552640;1553124;1553056;1553213;1553487;1553450;1553781;1553616;15…
194.269087844978;1552213;1552071;1551863;1551779;1551898;1551477;1551501;1551744;1551853;1551854;1551779;1551427;1551456;1551036;1551186;1551146;1551142;1551127;1551187;1551205;1551243;1551570;1551985;1552224;1552455;1553099;1553175;1553744;1553867;1553811;1553830;1554036;1554144;1554245;1554196;1554601;1554844;1555035;1555201;1555169;1555424;1555845;1555777;1555866;1555988;1556110;1556227;155649…
194.357809308498;1555554;1555257;1555123;1554845;1555126;1554755;1554827;1555095;1555050;1554994;1554835;1554692;1554537;1554380;1554385;1554525;1554302;1554140;1554469;1554254;1554506;1554910;1555180;1555520;1555761;1556310;1556382;1556918;1557043;1556952;1557361;1557535;1557482;1557647;1557658;1557914;1558150;1558481;1558476;1558554;1558720;1559094;1559099;1559139;1559402;1559546;1559788;155959…
194.446514959036;1558830;1558768;1558496;1558279;1558566;1558028;1558320;1558613;1558597;1558660;1558184;1558057;1557981;1557718;1557849;1557770;1557609;1557617;1557723;1557831;1557799;1558210;1558728;1558964;1559325;1559830;1559786;1560271;1560487;1560389;1560615;1561017;1561073;1560972;1561003;1561418;1561678;1561818;1561817;1562156;1562104;1562666;1562568;1562801;1562992;1562991;1563121;156318…
194.535204825071;1563706;1563469;1563290;1563067;1563372;1562810;1563040;1563311;1563130;1563251;1563315;1562742;1562598;1562555;1562493;1562475;1562607;1562362;1562560;1562564;1562596;1563003;1563450;1563743;1564031;1564642;1564741;1565130;1565464;1565506;1565535;1565965;1565805;1565864;1565996;1566362;1566485;1566923;1566590;1566772;1566987;1567422;1567512;1567873;1567885;1568006;1568058;156825…
194.62387893508;1566662;1566490;1566235;1565842;1566382;1565768;1565952;1566192;1566095;1566294;1566200;1565826;1565768;1565352;1565447;1565548;1565446;1565262;1565519;1565532;1565445;1566093;1566564;1566700;1567062;1567678;1567707;1568239;1568541;1568482;1568734;1569002;1569060;1569044;1569132;1569523;1569608;1569926;1569960;1570037;1570292;1570566;1570633;1570818;1571134;1571308;1571475;1571395…
194.71253731754;1568154;1568058;1567715;1567732;1567851;1567496;1567479;1567784;1567801;1567979;1567892;1567385;1567189;1567123;1566861;1567163;1566974;1567077;1566937;1567100;1567249;1567613;1568201;1568409;1568666;1569290;1569325;1569886;1570010;1570222;1570176;1570662;1570813;1570789;1570811;1570931;1571099;1571709;1571513;1571606;1571892;1572350;1572259;1572529;1572836;1572986;1573079;1572996…
194.801180000928;1571479;1571046;1570967;1570769;1571130;1570707;1570681;1571268;1571020;1571035;1570998;1570532;1570507;1570383;1570344;1570373;1570196;1570092;1570249;1570239;1570422;1570753;1571132;1571552;1571965;1572527;1572499;1573092;1573484;1573292;1573506;1573851;1573966;1573911;1573987;1574322;1574472;1574822;1574886;1575075;1575206;1575533;1575487;1575901;1576080;1576038;1576170;157623…
194.889807013723;1574059;1573827;1573450;1573481;1573697;1573369;1573228;1573631;1573640;1573491;1573566;1573193;1572935;1572837;1572666;1572937;1572729;1572658;1572738;1572672;1572915;1573423;1573952;1574256;1574563;1575269;1575208;1575726;1576015;1576114;1576222;1576502;1576765;1576556;1576555;1576823;1577246;1577513;1577536;1577591;1577935;1578156;1578226;1578542;1578836;1578646;1579001;157899…
194.978418384401;1579454;1579031;1578892;1578821;1579272;1578697;1578729;1579232;1579067;1579072;1578929;1578511;1578306;1578278;1578105;1578306;1578068;1577928;1578024;1578072;1578158;1578684;1579345;1579728;1579974;1580560;1580564;1580845;1581239;1581339;1581482;1581873;1581848;1582057;1582146;1582136;1582650;1582923;1582679;1582885;1583116;1583657;1583679;1583935;1583938;1584028;1584505;158427…
195.06701414144;1589201;1588593;1588663;1588275;1588735;1588391;1588434;1588780;1588571;1588819;1588608;1588155;1588035;1587735;1587748;1588000;1587466;1587543;1587500;1587606;1587869;1588249;1588865;1589239;1589585;1589992;1590301;1590773;1591165;1591263;1591403;1591739;1591960;1591838;1591696;1591927;1592405;1592636;1592427;1592768;1593028;1593319;1593421;1593766;1593844;1593860;1594186;1594189…
195.155594313317;1598501;1597809;1597792;1597467;1598085;1597501;1597605;1598051;1597988;1597936;1597684;1597318;1597016;1596718;1596974;1597043;1596791;1596759;1596767;1596637;1597128;1597556;1598102;1598467;1598945;1599478;1599755;1600355;1600510;1600711;1600815;1601227;1601333;1601133;1601397;1601562;1602018;1602335;1602160;1602218;1602593;1603096;1602990;1603380;1603472;1603697;1603941;160370…
195.244158928511;1607297;1606590;1606587;1606334;1606765;1606339;1606243;1606922;1606767;1606629;1606631;1606253;1605802;1605597;1605663;1605862;1605603;1605455;1605510;1605527;1605799;1606050;1606853;1607510;1607766;1608469;1608588;1609089;1609498;1609561;1609521;1610191;1610217;1610082;1610251;1610452;1610840;1611311;1610927;1611431;1611591;1612111;1612162;1612377;1612586;1612674;1612935;161274…
195.332708015497;1612498;1611994;1611755;1611661;1612031;1611466;1611759;1612036;1611988;1612106;1611854;1611458;1611238;1610997;1610855;1611093;1611019;1610726;1610843;1610859;1611248;1611714;1612430;1612917;1613393;1613893;1614091;1614743;1615126;1615043;1615507;1615970;1615828;1615770;1615950;1616102;1616700;1617227;1616758;1617014;1617299;1618069;1617972;1618515;1618710;1618486;1619110;161887…
195.421241602755;1607337;1606920;1606750;1606472;1606861;1606442;1606521;1606917;1607112;1607055;1606850;1606382;1606272;1606188;1606099;1606079;1605836;1606156;1606033;1605892;1606681;1606724;1607565;1607941;1608555;1608996;1609347;1609555;1610350;1610236;1610584;1610938;1611228;1610995;1611204;1611545;1611899;1612270;1612092;1612512;1612876;1613119;1613203;1613607;1613911;1613911;1614220;161407…
195.50975971876;1596312;1595962;1595750;1595617;1595837;1595756;1595575;1595979;1596006;1595912;1595715;1595462;1595212;1595188;1595163;1595178;1595050;1595021;1595073;1595191;1595436;1596115;1596424;1596906;1597369;1598091;1598204;1598701;1598999;1599219;1599165;1599809;1599946;1599878;1600008;1600286;1600531;1601202;1600967;1601356;1601643;1602062;1601844;1602400;1602758;1602833;1602962;1602924…
195.598262391991;1584827;1584292;1583994;1583998;1584203;1583900;1583729;1584203;1584069;1584255;1584078;1583646;1583692;1583459;1583592;1583670;1583494;1583354;1583437;1583424;1583850;1584178;1584596;1585053;1585582;1586309;1586245;1586701;1587067;1587129;1587264;1587786;1587866;1588085;1587838;1588368;1588564;1589004;1589067;1589182;1589191;1589697;1589799;1590213;1590556;1590636;1590820;159089…
195.686749650925;1574040;1573695;1573614;1573424;1573534;1573339;1573125;1573405;1573337;1573610;1573477;1573173;1573015;1572979;1572770;1572886;1572889;1572767;1572777;1572819;1573095;1573536;1574059;1574384;1574689;1575564;1575457;1575855;1576066;1576124;1576366;1576759;1576934;1577009;1576923;1577270;1577444;1577881;1577816;1578255;1578539;1578658;1578679;1578931;1579273;1579464;1579609;157965…
195.77522152404;1571287;1571094;1570737;1570663;1570671;1570511;1570415;1570710;1570770;1570720;1570615;1570425;1570171;1570177;1570221;1570095;1569840;1569769;1570069;1569994;1570187;1570676;1571070;1571327;1571573;1572205;1572387;1572759;1573112;1573132;1573168;1573764;1573703;1573702;1573784;1574158;1574452;1574676;1574829;1574566;1575066;1575441;1575440;1575596;1575948;1575900;1576218;1576092…
195.863678039812;1578045;1578047;1577831;1577509;1577784;1577303;1577496;1577653;1577527;1577756;1577654;1577310;1576980;1576948;1576773;1577137;1576676;1576665;1577102;1576803;1577084;1577399;1577786;1578019;1578531;1579057;1579207;1579906;1579929;1579854;1580036;1580465;1580462;1580446;1580518;1580827;1581268;1581348;1581632;1581614;1581934;1581967;1582298;1582571;1582553;1582826;1583023;158292…
195.95211922672;1590912;1590586;1590375;1590054;1590360;1590100;1589755;1590187;1590181;1590557;1589942;1589777;1589456;1589444;1589303;1589644;1589387;1589243;1589441;1589307;1589656;1589943;1590353;1590629;1591164;1591988;1591808;1592407;1592725;1592849;1592857;1593213;1593401;1593273;1593555;1593752;1593961;1594256;1594368;1594462;1594584;1595069;1594972;1595289;1595452;1595658;1595789;1595761…
196.040545113241;1607791;1607480;1607002;1606877;1607462;1607018;1606818;1607162;1607277;1607112;1607021;1606611;1606359;1606156;1606185;1606209;1606104;1605895;1606114;1606199;1606555;1606767;1607463;1607541;1608191;1608729;1608771;1609164;1609750;1609742;1609903;1610383;1610335;1610266;1610479;1610723;1611098;1611355;1611579;1611785;1611913;1612354;1612290;1612479;1612746;1613086;1613047;161292…
196.128955727852;1626121;1625497;1625227;1624996;1625491;1625044;1625055;1625198;1625343;1625598;1625134;1624962;1624365;1624330;1624160;1624405;1624245;1623918;1624150;1624174;1624351;1624971;1625434;1625788;1626603;1627177;1627440;1627957;1628338;1628337;1628603;1628964;1628930;1628983;1629043;1629433;1629720;1630278;1630287;1630468;1630740;1631096;1631037;1631338;1631735;1631832;1631912;163200…
196.21735109903;1647569;1646999;1646830;1646592;1646988;1646420;1646534;1646881;1646870;1646997;1646872;1646170;1645824;1645782;1645732;1645931;1645916;1645563;1645501;1645707;1646034;1646435;1647280;1647617;1648278;1649017;1649293;1649871;1650218;1650280;1650411;1651339;1651288;1651050;1651247;1651456;1651924;1652399;1652404;1652706;1652905;1653486;1653659;1653973;1654164;1654370;1654784;1654418…
196.305731255254;1670203;1669622;1669340;1668813;1669251;1668985;1668913;1669600;1669374;1669436;1669108;1668855;1668295;1668171;1668155;1668426;1668212;1667840;1667930;1667851;1668216;1668900;1669774;1670178;1670932;1671631;1671924;1672578;1673047;1672976;1673275;1673919;1674130;1674006;1674215;1674438;1675039;1675515;1675412;1675708;1675912;1676570;1676742;1677015;1676950;1677246;1677730;167753…
196.394096225;1699075;1698466;1698103;1698016;1698562;1697792;1698126;1698629;1698297;1698716;1698197;1697658;1697454;1696744;1697041;1697290;1696954;1696686;1696773;1696769;1697343;1697822;1698760;1699519;1699937;1701117;1701197;1702006;1702764;1702533;1702678;1703608;1703521;1703374;1703795;1704080;1704745;1705428;1705205;1705439;1706107;1706728;1706585;1707102;1707238;1707453;1707861;1707822;1…
196.482446036746;1724844;1724020;1723948;1723212;1723921;1723271;1723321;1724034;1724121;1724051;1723826;1723057;1722715;1722520;1722126;1722772;1722288;1721724;1722440;1722337;1722607;1723369;1724429;1725158;1725855;1726941;1727209;1727810;1729007;1728565;1729126;1729857;1729952;1729561;1729826;1730356;1730799;1731918;1731591;1732159;1732535;1733228;1733189;1733868;1734343;1733938;1734528;173457…
196.57078071897;1755188;1754180;1754240;1753725;1754413;1753397;1753878;1754461;1754153;1754391;1754077;1753560;1753000;1752836;1752780;1752668;1752506;1752139;1752502;1752466;1753045;1753804;1755262;1755655;1756303;1757748;1757971;1758795;1759670;1759224;1760004;1760889;1760895;1760474;1760756;1761325;1762052;1762722;1762302;1763059;1763593;1764370;1764188;1764952;1765157;1765150;1766129;1765579…
196.659100300148;1780561;1779381;1779128;1778567;1779382;1778378;1778784;1779429;1779500;1779386;1779504;1778509;1777827;1778058;1777600;1777776;1777695;1777469;1777675;1777659;1778251;1779070;1780510;1781286;1781990;1783167;1783818;1784665;1785735;1785523;1786125;1786950;1787536;1786814;1787062;1788002;1788506;1789658;1789430;1789613;1790197;1791292;1791398;1792206;1792504;1792662;1793595;179307…
196.747404808759;1779206;1778078;1778281;1777456;1778572;1777346;1777693;1778636;1778661;1778870;1778147;1777507;1777034;1776818;1776934;1777219;1776793;1776534;1777054;1776740;1777595;1778631;1779939;1780669;1781440;1783024;1783453;1784206;1785469;1785120;1785526;1786935;1787182;1786790;1786911;1787427;1788459;1789847;1789415;1789738;1790422;1791343;1791433;1792186;1792399;1792946;1793433;179329…
196.83569427328;1776943;1775901;1775666;1775360;1775853;1775110;1775157;1776278;1776268;1776298;1776004;1775532;1774905;1774528;1774387;1774725;1774049;1774246;1774472;1774300;1775270;1775932;1777284;1777698;1779014;1780524;1780954;1781745;1782887;1782433;1783171;1784115;1784182;1783951;1784292;1784814;1785895;1786732;1786591;1787208;1787498;1788357;1788640;1789364;1790005;1789845;1790473;1790411…
196.923968722188;1777317;1776690;1776239;1775694;1776601;1775844;1775897;1777125;1777075;1777210;1776697;1775765;1775272;1775282;1775180;1775213;1774667;1774897;1775095;1774915;1775610;1776382;1777799;1778629;1779911;1780943;1781474;1782661;1783508;1783358;1783883;1784920;1784975;1784732;1784990;1785998;1786697;1787352;1787077;1787947;1788139;1789334;1788990;1790402;1790577;1790868;1791507;179144…
197.01222818396;1781887;1780618;1780426;1779744;1780885;1780235;1779883;1780871;1780849;1780887;1780625;1779714;1779298;1778924;1779086;1779036;1778516;1778319;1778656;1778643;1779310;1780389;1781558;1782196;1783389;1784536;1785074;1786287;1787137;1787124;1787412;1788291;1788472;1788379;1788407;1789365;1789857;1790564;1790576;1790926;1791886;1792327;1792463;1793740;1794125;1794012;1794729;1794517…
197.100472687075;1813980;1812726;1812286;1812290;1813319;1812049;1811966;1813260;1813186;1813251;1812636;1811705;1811518;1810829;1810963;1810802;1810057;1810616;1810867;1810552;1811277;1812462;1813921;1814673;1815559;1816737;1817430;1818545;1819433;1819166;1819740;1820937;1820961;1820996;1820717;1821480;1822420;1823300;1823141;1823568;1824457;1825307;1825373;1826325;1826622;1826319;1827171;182699…
197.188702260009;1853635;1852659;1852268;1851644;1852993;1851498;1851823;1852759;1852910;1852975;1852549;1851188;1850959;1850321;1850450;1850795;1849737;1849771;1850168;1850207;1850949;1851898;1853744;1854406;1855748;1857376;1857798;1858676;1859876;1859598;1860354;1861625;1861668;1861565;1861573;1862358;1863662;1864360;1864184;1864359;1865623;1866445;1866582;1867586;1867894;1867804;1869106;186839…
197.27691693124;1899218;1897857;1897419;1896997;1898003;1896659;1897132;1898311;1898017;1898041;1897546;1896524;1895656;1895527;1895359;1895636;1895112;1894822;1895127;1895020;1896127;1897099;1898994;1899506;1901357;1903045;1903546;1905029;1905695;1905443;1906492;1907617;1907723;1907450;1907853;1908345;1909948;1910918;1910197;1910678;1911875;1913137;1912982;1914258;1914410;1914548;1915393;1915114…
197.365116729245;1956233;1954947;1954552;1953701;1955158;1954042;1953977;1955585;1955239;1955102;1954958;1953652;1952781;1952773;1952796;1952673;1952003;1951639;1952417;1952102;1953052;1954550;1956698;1957560;1959255;1960869;1961353;1963003;1964248;1964035;1965060;1966166;1966494;1966369;1966621;1967444;1968497;1969813;1969282;1969952;1970997;1972451;1972265;1973518;1973920;1974321;1975391;197478…
197.453301682503;2002193;2000613;2000599;1999724;2001162;1999906;1999935;2001354;2001371;2001054;2000775;1999766;1998414;1998247;1998516;1998535;1998084;1998038;1998143;1998231;1999186;2000894;2003237;2004448;2006080;2008141;2008440;2010086;2011610;2011484;2012588;2013588;2014313;2014159;2013983;2015091;2016514;2017879;2017771;2018349;2019336;2021162;2020829;2022465;2022929;2023370;2024302;202347…
197.541471819489;2049774;2048094;2047999;2046893;2048534;2047013;2047664;2048996;2048793;2048685;2048434;2047015;2046384;2045721;2045364;2046124;2045236;2045162;2045480;2045682;2046666;2048217;2050873;2051936;2053631;2055825;2056552;2058339;2059736;2059924;2060768;2062426;2062861;2062919;2063041;2063458;2064958;2066819;2066811;2067148;2068129;2069708;2069789;2071450;2071572;2072359;2073353;207275…
197.629627168683;2102657;2100189;2100113;2098866;2100982;2098772;2099666;2101222;2101189;2101112;2100474;2099082;2098056;2097944;2097174;2098309;2097757;2097461;2097507;2097809;2099146;2100797;2103608;2105085;2106592;2109698;2110285;2111955;2113260;2113647;2114466;2116389;2116656;2116548;2117277;2117572;2119452;2120894;2120528;2121993;2122836;2125175;2124939;2126485;2126838;2127336;2128772;212787…
197.71776775856;2142079;2139543;2139242;2138477;2140628;2138148;2139330;2140725;2140070;2140790;2140321;2138749;2137483;2137347;2136991;2137815;2137096;2137182;2137393;2137737;2139188;2140524;2144127;2145484;2147738;2150296;2151532;2152455;2154468;2154450;2155887;2157889;2158155;2158152;2158686;2159461;2161210;2162959;2163044;2163586;2165270;2167374;2167151;2168676;2169876;2169949;2171552;2170256…
197.805893617599;2150647;2148610;2148289;2147185;2149305;2147141;2148658;2150092;2149437;2149636;2148983;2147903;2146445;2146825;2145791;2147221;2146745;2146524;2146728;2147229;2148665;2150302;2154189;2155555;2158316;2160902;2161562;2162983;2165256;2165767;2166648;2168848;2169465;2169432;2169558;2170814;2172837;2174576;2174503;2175336;2176522;2178787;2179086;2180543;2181118;2181956;2183307;218259…
197.894004774277;2109297;2107145;2107084;2106347;2108023;2106083;2106957;2109195;2108186;2108464;2107561;2107107;2105730;2105354;2105433;2106843;2106013;2106232;2106138;2106753;2108417;2110092;2113941;2114993;2116778;2120335;2121396;2122110;2124978;2125206;2126033;2128216;2128584;2129087;2129568;2130011;2131986;2133953;2133883;2134776;2136121;2138427;2138440;2140011;2140510;2141884;2142681;214229…
197.982101257072;2040549;2038631;2038500;2037665;2039474;2037468;2038592;2040125;2039604;2039689;2038995;2038278;2037257;2037406;2037435;2038100;2037574;2037840;2038145;2038426;2040182;2041478;2044574;2045525;2047657;2050409;2051506;2052604;2054669;2054987;2055696;2057414;2058347;2058368;2058668;2059465;2061147;2062888;2063127;2063481;2064654;2066975;2066991;2068479;2068216;2069677;2070902;207030…
198.07018309446;1978910;1977375;1976984;1976484;1977987;1975990;1977177;1978567;1977538;1978031;1977535;1976661;1975931;1975768;1976018;1976699;1976030;1976164;1976469;1976938;1978325;1979433;1982369;1983115;1985022;1987522;1988522;1989266;1991433;1991597;1992067;1993661;1994418;1995075;1995285;1995385;1996936;1998684;1998800;1999231;2000129;2002016;2002058;2003262;2003422;2004958;2005547;2005008…
198.15825031492;1942310;1941157;1940772;1940328;1941475;1939891;1940402;1941891;1940968;1941283;1940970;1940206;1939475;1939141;1939294;1940050;1939602;1939399;1939842;1939949;1940970;1942442;1944679;1945626;1946849;1949191;1950190;1950827;1952260;1952875;1953363;1954929;1955508;1955376;1955792;1955826;1957032;1958878;1959328;1959550;1960480;1962307;1961838;1963165;1963196;1964343;1965210;1964170…
198.246302946929;1962891;1961650;1961669;1961004;1962132;1960324;1961170;1962125;1961678;1961819;1961399;1960573;1959543;1959836;1959508;1960114;1960012;1959397;1960025;1959536;1960894;1962078;1964844;1965364;1966902;1969015;1969941;1970641;1971988;1972407;1972979;1974334;1974682;1974648;1975120;1975282;1976164;1978144;1978333;1978454;1979561;1980753;1980932;1981656;1982106;1982784;1983776;198295…
198.334341018964;2029731;2028243;2028011;2027376;2028728;2026541;2027952;2028943;2028326;2028368;2027558;2026829;2025631;2026119;2025586;2026420;2026015;2025681;2025991;2026141;2027594;2028649;2031440;2032256;2033855;2036210;2037102;2037626;2039696;2040070;2039815;2041791;2042224;2042725;2042784;2043339;2044346;2046097;2046264;2046719;2047596;2049406;2048852;2050014;2050192;2051492;2052005;205139…
198.422364559502;2105860;2104405;2104179;2103006;2105137;2102219;2103871;2104602;2104452;2104751;2103866;2102588;2101457;2102079;2101369;2102299;2101879;2101541;2101972;2101836;2103715;2104990;2108079;2109320;2111096;2113758;2114280;2115525;2117380;2117841;2118398;2120209;2120480;2120780;2120989;2121288;2123154;2124760;2124816;2125564;2126741;2128908;2128520;2129443;2129563;2130955;2131855;213119…
198.510373597022;2183954;2182083;2182534;2181033;2183175;2180433;2181593;2182786;2182551;2182840;2181611;2180607;2179301;2179554;2179190;2179932;2179565;2179664;2180212;2179530;2181492;2182925;2186624;2187809;2189759;2192635;2193731;2195438;2197457;2197542;2198321;2200516;2201240;2201180;2201169;2201630;2203463;2205530;2205969;2206486;2207777;2210210;2210042;2211219;2211456;2213222;2214025;221259…
198.59836816;2253446;2250936;2250748;2249751;2251480;2248871;2250206;2251668;2250814;2250758;2250500;2249098;2247923;2248150;2247943;2249002;2247903;2247816;2248107;2248063;2249945;2251787;2255621;2256988;2258888;2262567;2263818;2265372;2267891;2267985;2268492;2270994;2271579;2271650;2271825;2272570;2274230;2277061;2277161;2278072;2279115;2281699;2281509;2283178;2283196;2284536;2286007;2285569;22…
198.686348276914;2326383;2324021;2323363;2322380;2324351;2321788;2322658;2324586;2324118;2324422;2323198;2321908;2320418;2320478;2320339;2321748;2320681;2320481;2320573;2321056;2322721;2324819;2328803;2330152;2332820;2336972;2337046;2339648;2341853;2342404;2343449;2345458;2346465;2346539;2347021;2348059;2350043;2352375;2352548;2353762;2354753;2357755;2357811;2359116;2359692;2361272;2362629;236232…
198.774313976242;2392476;2390091;2389710;2388209;2390723;2387290;2388470;2390412;2389539;2390430;2389580;2387812;2385965;2386158;2386087;2387448;2386206;2385714;2386601;2386666;2388343;2390925;2395002;2397351;2399752;2403579;2404524;2406843;2409091;2409668;2410382;2413570;2414268;2413746;2414525;2415584;2417856;2420483;2420860;2421765;2423568;2426244;2426138;2428232;2428474;2430485;2431734;243085…
198.86226528646;2456713;2453993;2453989;2452152;2454469;2451170;2452417;2454654;2453620;2454715;2453631;2451133;2450115;2450258;2450003;2451247;2450189;2450467;2450489;2450853;2453140;2455133;2459264;2461336;2464676;2468758;2470105;2472504;2474903;2475802;2476278;2479411;2480373;2479784;2480728;2481691;2484171;2487700;2488140;2488726;2490296;2493472;2493681;2495249;2496282;2498047;2499611;2498807…
198.950202236047;2497461;2495086;2494080;2492853;2495353;2491948;2493175;2495378;2494714;2495648;2494990;2492786;2491011;2491464;2491228;2492090;2491329;2491260;2491952;2491806;2493849;2496635;2501080;2503483;2506860;2510947;2512162;2514640;2517875;2517932;2518887;2522155;2522936;2523230;2523428;2525294;2528147;2531132;2531507;2532505;2533722;2537353;2537402;2539313;2540528;2542017;2543541;254339…
199.03812485348;2505556;2502736;2501860;2500626;2503204;2500007;2501056;2503477;2502627;2503287;2502774;2500647;2498951;2499506;2499010;2500069;2499078;2499133;2500057;2500401;2501665;2504764;2509439;2511458;2515529;2519486;2520948;2523179;2526445;2527003;2528072;2531200;2531446;2532128;2532765;2534831;2537032;2540386;2540542;2542000;2544144;2546691;2546991;2549544;2550570;2552174;2553898;2553589…
199.126033167236;2487712;2485405;2484366;2483045;2485260;2483025;2483484;2485857;2485386;2485595;2485681;2482907;2481194;2481709;2482105;2482980;2481926;2481465;2482195;2482486;2484598;2487137;2491590;2493869;2497684;2501951;2503226;2506315;2508727;2509214;2510698;2514208;2514224;2514959;2515937;2517142;2519634;2522503;2522660;2524118;2526274;2529544;2529734;2531764;2532979;2534348;2536654;253592…
199.213927205792;2466353;2463885;2463334;2460924;2463801;2462029;2461929;2463976;2463747;2464081;2463802;2461373;2460001;2460085;2459754;2461095;2459544;2459885;2460943;2460518;2462669;2465521;2469436;2471479;2475657;2478966;2480634;2483911;2485911;2486751;2488129;2491346;2491673;2492009;2492898;2494233;2496995;2499404;2499767;2501284;2503435;2506373;2506702;2508928;2510097;2511400;2513415;251288…
199.301806997627;2472563;2469695;2469279;2467534;2470334;2468157;2467676;2470267;2470480;2470014;2469365;2467228;2465713;2465579;2465740;2466500;2464861;2464879;2465546;2465657;2467403;2470932;2474108;2477098;2480891;2484149;2485816;2488822;2491423;2492203;2493061;2496195;2496150;2497143;2497708;2499597;2501700;2503827;2504244;2505365;2508204;2510894;2510479;2513543;2514856;2515587;2517599;251671…
199.389672571217;2505439;2503466;2502981;2500751;2503785;2500798;2501055;2503499;2503435;2503554;2502598;2500821;2498386;2498297;2498660;2499319;2498213;2497378;2498952;2498904;2500450;2503683;2507256;2510057;2513342;2517652;2518835;2521757;2525328;2524487;2526609;2529327;2529560;2530466;2531022;2532968;2534872;2537624;2537715;2538768;2541772;2544361;2543936;2546886;2548159;2548586;2550686;255082…
199.47752395504;2579911;2577827;2576375;2574102;2577337;2574741;2574420;2576827;2577019;2576968;2576505;2573580;2572047;2571525;2571512;2571948;2570713;2570826;2571905;2571814;2573580;2576991;2580811;2583269;2586617;2591630;2592455;2596107;2598432;2597982;2600343;2603921;2604338;2604000;2604939;2607257;2609592;2612503;2612390;2613231;2615932;2619718;2619183;2621794;2623399;2623618;2626104;2625965…
199.565361177573;2679366;2676425;2674886;2672965;2676709;2673464;2673163;2675946;2675524;2676330;2675149;2672458;2670816;2670379;2670692;2671107;2669970;2669615;2670604;2670460;2672759;2676377;2680020;2683111;2686748;2691937;2693365;2696674;2699849;2699654;2701283;2705261;2705316;2705897;2706670;2708990;2711511;2714498;2714875;2716137;2718938;2722450;2722305;2724348;2726366;2726773;2729331;272956…
199.653184267295;2761414;2758066;2756956;2755069;2758193;2755206;2754799;2757196;2756911;2758122;2757382;2754491;2752654;2752397;2752251;2753058;2751930;2751291;2752500;2752225;2754430;2758811;2762712;2765834;2770328;2775271;2777473;2780388;2783358;2783691;2785909;2789315;2790311;2790634;2791165;2793520;2796803;2799820;2800706;2802692;2804705;2809151;2808445;2810969;2812879;2813672;2816193;281643…
199.740993252681;2841185;2838821;2836333;2834364;2837878;2834779;2834142;2836768;2836532;2837385;2836558;2834252;2831988;2831319;2831285;2833103;2831159;2830603;2832446;2831534;2834167;2838430;2842394;2846028;2850669;2855883;2857643;2861668;2865012;2864941;2866454;2871147;2871744;2871863;2873085;2875192;2878380;2882581;2883126;2884327;2887188;2891240;2891712;2894048;2895966;2896704;2899513;289982…
199.828788162211;2928693;2925501;2923732;2921450;2924347;2921468;2921047;2923166;2923513;2924442;2923475;2920955;2918674;2917542;2918332;2919826;2917494;2917114;2919546;2918372;2921015;2925339;2930691;2933813;2937910;2944386;2945788;2951165;2954317;2953975;2956109;2960472;2961288;2961318;2961764;2964849;2967746;2972577;2972754;2974786;2977481;2981344;2981584;2984784;2986236;2988099;2991064;299087…
199.91656902436;2995880;2993533;2991098;2988860;2992154;2988216;2987881;2991048;2990667;2992440;2990207;2987857;2986132;2985531;2985319;2987081;2985497;2984301;2986313;2985787;2988646;2992943;2998454;3001598;3006734;3012671;3014479;3019561;3023426;3023280;3025303;3030051;3030875;3031008;3031796;3033958;3037646;3042530;3043145;3045448;3047864;3052521;3052355;3055880;3057741;3058939;3062415;3062450…
200.004335867607;3062135;3059541;3057400;3055317;3058469;3054576;3053283;3057168;3057424;3058992;3057623;3053836;3052252;3051433;3051149;3053234;3051493;3050370;3052291;3052102;3054787;3059141;3065717;3069196;3073605;3080380;3082050;3087025;3090749;3090747;3093224;3097313;3099226;3098929;3099548;3102814;3106206;3111783;3112345;3113977;3116991;3121523;3121192;3124471;3126092;3128679;3131938;313182…
200.092088720429;3130952;3128526;3126601;3123564;3127047;3122858;3122339;3124931;3125479;3127041;3125031;3122499;3120096;3120216;3119597;3121492;3120221;3119235;3120281;3120409;3123303;3127871;3134215;3138028;3143043;3149867;3151472;3155965;3160974;3161121;3163138;3168170;3169396;3169011;3170550;3173013;3176957;3182211;3183471;3184354;3188357;3193247;3192757;3195916;3197328;3200191;3203439;320349…
200.179827611304;3186306;3183440;3181534;3177987;3181699;3177723;3177263;3180732;3180135;3182545;3180689;3177479;3175157;3175190;3175174;3177088;3175382;3174508;3175621;3175823;3178391;3183891;3190178;3193653;3198844;3206745;3208044;3212935;3218156;3218460;3219944;3225299;3226065;3226873;3227291;3231089;3234995;3239726;3241464;3243156;3246443;3250940;3251464;3254009;3256878;3259101;3262135;326300…
200.267552568708;3232872;3229734;3227818;3224642;3228257;3223909;3222790;3226935;3226536;3229057;3227031;3223801;3221456;3221371;3221919;3223896;3221563;3220317;3222549;3222257;3225341;3230798;3236700;3240356;3245555;3252936;3255537;3260537;3266172;3265478;3267869;3273259;3273742;3274256;3275417;3279045;3282248;3288180;3289478;3291545;3293907;3299788;3299461;3303280;3305212;3308008;3310951;331130…
200.35526362112;3271265;3267907;3265406;3263261;3266618;3262889;3261879;3264692;3264759;3267418;3265420;3262150;3260085;3259169;3259451;3261949;3260495;3259240;3261229;3261067;3263716;3269307;3275599;3280252;3285481;3292723;3295220;3300640;3305163;3305155;3307722;3313789;3314120;3314253;3315865;3318965;3323446;3328913;3330164;3332651;3335056;3341267;3341131;3344312;3347309;3349713;3353089;3353493…
200.442960797017;3251243;3247309;3244724;3242148;3246461;3242426;3241464;3244617;3244729;3247459;3244244;3241902;3240044;3239349;3240313;3242350;3241524;3239876;3241798;3241859;3245308;3249861;3256677;3261067;3267042;3274290;3276553;3281393;3287463;3287483;3288935;3294750;3296464;3296379;3298062;3301577;3306339;3311006;3313388;3315557;3317680;3324228;3324339;3327039;3329846;3332780;3336911;333692…
200.530644124876;3155473;3152244;3150666;3147370;3150940;3147503;3146449;3149719;3149549;3152408;3150489;3148053;3145548;3146253;3146238;3148044;3147398;3146430;3148729;3148080;3151399;3156584;3162712;3167016;3172190;3179810;3181194;3186961;3192143;3191897;3193376;3199173;3200572;3201061;3202267;3205752;3209934;3215621;3217396;3218922;3222169;3227666;3227826;3231085;3233347;3236199;3240329;323985…
200.618313633174;3046514;3043803;3042156;3039520;3042695;3039006;3038416;3041706;3041502;3043325;3042082;3039716;3037674;3037403;3037416;3039522;3038219;3037736;3039849;3039478;3042051;3046716;3053035;3056799;3061855;3068498;3070241;3075879;3080435;3080147;3081881;3087777;3089258;3089530;3090336;3093021;3096692;3102395;3103786;3106126;3107932;3112952;3113888;3116270;3118399;3122238;3125031;312492…
200.70596935039;2968730;2966254;2964343;2961994;2964723;2961165;2960433;2963069;2962892;2965050;2964076;2961654;2958675;2958903;2959327;2961611;2960464;2959049;2961268;2961359;2962944;2967574;2973551;2976916;2982068;2987797;2989482;2994617;2998666;2998602;2999967;3004999;3006228;3007135;3007201;3010051;3013270;3019015;3020794;3022269;3024502;3029765;3029559;3031950;3034513;3037248;3039773;3039962…
200.793611305;2939299;2936936;2934813;2932649;2935686;2931476;2931341;2933297;2933205;2935173;2934243;2931947;2929629;2929482;2929440;2931162;2930618;2929074;2930667;2931302;2932966;2937187;2942375;2945547;2950269;2956799;2957848;2962238;2966982;2966515;2968016;2972704;2974176;2973386;2974797;2977294;2980883;2985571;2987149;2988944;2990864;2996175;2996121;2998017;3000152;3003126;3006033;3006013;3…
200.881239525482;2994343;2991320;2990168;2987986;2990462;2986677;2985604;2988071;2988139;2990305;2988798;2986277;2983823;2984048;2983721;2985272;2984139;2983488;2984739;2984476;2987022;2990867;2996589;2999519;3003577;3010790;3012146;3016309;3020250;3020331;3021944;3026587;3027197;3027626;3027915;3030991;3034881;3038949;3040796;3042225;3044036;3049198;3049035;3051063;3053491;3056144;3058352;305792…
200.968854040314;3110638;3107833;3106247;3103833;3107017;3102002;3101991;3104783;3104298;3106196;3104609;3101962;3099147;3099388;3099017;3100833;3100014;3099174;3100624;3100145;3102509;3107236;3113243;3116434;3121327;3128034;3130379;3134197;3138664;3139029;3140387;3145499;3146607;3146308;3147841;3150057;3154106;3158553;3160721;3162081;3164883;3169779;3169825;3171310;3173687;3176217;3178966;317922…
201.056454877972;3223583;3220262;3217832;3215308;3219012;3214245;3213428;3216198;3216584;3218493;3216718;3213676;3211542;3211612;3211279;3212692;3211153;3210401;3212079;3211714;3214559;3219452;3226550;3230087;3235229;3242535;3244114;3249340;3254183;3254379;3255642;3260506;3262565;3262448;3262863;3266571;3270281;3275167;3277310;3278684;3281483;3287196;3287508;3289323;3291349;3294448;3297419;329761…
201.144042066935;3325326;3322130;3319967;3317650;3320868;3316236;3316013;3318754;3318327;3320639;3319268;3315581;3312815;3313401;3312916;3315053;3313526;3312446;3314396;3314249;3317339;3322180;3329410;3332954;3338785;3347077;3348921;3354587;3359182;3359244;3360951;3366874;3368335;3368564;3369779;3372041;3376291;3382495;3383688;3385697;3389318;3394645;3395011;3396975;3399106;3402812;3405706;340556…
201.23161563568;3412037;3408183;3406292;3403856;3406888;3402756;3402497;3404972;3404609;3407013;3405220;3401768;3398431;3398679;3398793;3400313;3399953;3398958;3400188;3400108;3403735;3409010;3416898;3420318;3427463;3435250;3437710;3442738;3447549;3448012;3450261;3455851;3457672;3457869;3458760;3461559;3465867;3472457;3474589;3475370;3478577;3485204;3485170;3487603;3490011;3493493;3495625;3496150…
201.319175612684;3490037;3485489;3484047;3481003;3485057;3479743;3479919;3483413;3481459;3484937;3482299;3478851;3476756;3476755;3476398;3479265;3477110;3476694;3478035;3478393;3482437;3487461;3495751;3499972;3506760;3515701;3517965;3522741;3528451;3529202;3531314;3536924;3539297;3538931;3540091;3542339;3547608;3554115;3556201;3557845;3561038;3568308;3568531;3571116;3573605;3577162;3580653;358007…
201.406722026424;3548169;3543671;3541861;3539119;3543700;3536427;3539046;3542091;3540312;3542618;3540329;3537900;3534015;3534963;3534038;3537441;3536045;3535378;3537205;3537016;3541042;3546542;3555822;3559773;3567083;3575303;3577686;3582827;3589013;3590586;3592710;3598747;3599956;3600533;3601743;3604322;3608245;3616276;3618379;3620611;3623266;3629955;3630067;3632897;3636156;3640347;3643051;364232…
201.494254905379;3570654;3566110;3565184;3561579;3566008;3560059;3562631;3566051;3564365;3565860;3563240;3560444;3557268;3557660;3557334;3561010;3559634;3559311;3560669;3560545;3564457;3570830;3580471;3584558;3591926;3600104;3603013;3607935;3613987;3615860;3617995;3624050;3626191;3626687;3628404;3630783;3634901;3641818;3644541;3646491;3650109;3657982;3656251;3660589;3663069;3667014;3669710;366922…
201.581774278025;3568629;3564315;3563690;3560128;3564772;3558203;3561919;3565506;3563018;3564539;3562454;3559457;3556373;3556573;3556265;3558935;3558230;3557498;3558856;3559559;3564118;3570155;3579666;3583423;3590625;3600217;3603232;3607723;3613454;3615877;3617502;3623854;3625558;3626519;3627312;3630331;3634625;3641866;3644488;3645681;3649120;3656840;3657097;3659468;3662013;3666053;3669656;366884…
201.66928017284;3569710;3565065;3564373;3560625;3565765;3559387;3562752;3566844;3564011;3564292;3562825;3561035;3557085;3556863;3556622;3559371;3558229;3558647;3559626;3560197;3565633;3570418;3580827;3583601;3591873;3600199;3604529;3608362;3614491;3616805;3619415;3624299;3626410;3628214;3629211;3631332;3636122;3641949;3644269;3646409;3649533;3657813;3657894;3660765;3662782;3667753;3670444;3669067…
201.756772618301;3584909;3579744;3579479;3576318;3581000;3574205;3578252;3582097;3579153;3579556;3578253;3575331;3571438;3572554;3571034;3574940;3573088;3572803;3574497;3574997;3579845;3585797;3595874;3599378;3606671;3615667;3619738;3623851;3629045;3632345;3634737;3639341;3642273;3643307;3644389;3646842;3650697;3657897;3660272;3661597;3665756;3673087;3673054;3676382;3678116;3682252;3685105;368416…
201.844251642887;3622341;3617379;3617436;3613374;3618541;3611753;3615957;3619444;3616696;3617252;3615322;3612755;3609091;3609830;3608026;3611384;3610640;3609965;3611630;3612303;3617490;3622740;3633355;3636888;3644154;3653532;3657851;3661370;3667489;3669367;3672666;3677795;3680578;3681875;3682184;3683811;3689606;3695756;3698200;3699766;3703463;3711226;3711110;3714461;3716124;3720005;3724371;372192…
201.931717275073;3701935;3696895;3695323;3693060;3697351;3690182;3694178;3698276;3695416;3695528;3694078;3691980;3687409;3688424;3687567;3690214;3688875;3688379;3689275;3691466;3695040;3702101;3712721;3716023;3723557;3733214;3737744;3741162;3746506;3749623;3752314;3757650;3760569;3760797;3762150;3764110;3769780;3776608;3778710;3779853;3783562;3791139;3791835;3795763;3797351;3801283;3805131;380345…
202.019169543339;3785888;3780924;3779399;3775533;3781620;3774585;3778097;3781498;3778667;3779569;3777451;3774722;3771020;3771685;3770317;3773977;3771788;3772123;3773569;3774335;3779342;3785090;3796485;3800038;3807409;3818050;3822040;3826891;3832631;3834960;3838178;3843265;3846010;3848127;3848962;3850840;3856108;3863439;3865933;3867425;3871538;3879487;3879771;3882553;3885397;3890009;3893166;389140…
202.10660847616;3866978;3861171;3859747;3856290;3861538;3854806;3858255;3862124;3859559;3860737;3858920;3854887;3851478;3851506;3850322;3854162;3852953;3851971;3853658;3854938;3859568;3866494;3877358;3881148;3889217;3899993;3904055;3908018;3914361;3917345;3919697;3925519;3929060;3929117;3931088;3932922;3938444;3945973;3949202;3950476;3954791;3962163;3962353;3965727;3968838;3973609;3977136;3975900…
202.194034102015;3943633;3938752;3936758;3933107;3938345;3930591;3934431;3937950;3934679;3936661;3935051;3931883;3927183;3927844;3926655;3930112;3928634;3927955;3929916;3930869;3935750;3942719;3953426;3958205;3966200;3976694;3980395;3986726;3993649;3995103;3997415;4004637;4006341;4007794;4009100;4011813;4015982;4025935;4027886;4029719;4033703;4043011;4042614;4045597;4048386;4052612;4056617;405633…
202.281446449381;4008719;4003848;4002576;3998521;4004126;3995405;3998122;4002054;4000280;4002364;3999543;3996032;3992004;3993289;3991983;3995647;3993719;3993372;3994972;3994926;4000474;4007094;4018226;4022467;4030962;4042683;4046651;4052261;4058975;4061249;4064200;4070406;4072904;4074301;4074507;4078332;4083268;4091920;4095285;4096921;4101036;4110333;4110496;4113661;4115776;4121662;4125318;412530…
202.368845546736;4063653;4057634;4056673;4052259;4058311;4049354;4052189;4055937;4053908;4056108;4054162;4050646;4045629;4047330;4045933;4049953;4048034;4046112;4049267;4049017;4053893;4061809;4072939;4077620;4085126;4097059;4100044;4106622;4114482;4114688;4118612;4125730;4127357;4128877;4130130;4134111;4139391;4148377;4151096;4152508;4157278;4166348;4166146;4169651;4172548;4177463;4182284;418110…
202.456231422556;4117252;4111457;4109453;4105315;4110914;4103154;4105092;4108977;4107587;4109615;4107199;4102604;4098455;4099841;4098589;4102647;4101196;4099688;4101774;4101950;4107567;4114491;4125469;4131105;4138715;4150340;4155106;4161066;4167852;4169427;4172088;4179586;4181662;4182587;4184501;4188023;4194028;4203411;4205274;4208079;4212002;4220910;4221355;4224354;4228225;4233197;4236967;423727…
202.54360410532;4169748;4165162;4161777;4156892;4162516;4155224;4156532;4160635;4158906;4161904;4159034;4155446;4150995;4151754;4151407;4154818;4153040;4151430;4154118;4154350;4158690;4166313;4177311;4182353;4191627;4203381;4206868;4213824;4221713;4222388;4225657;4231668;4235976;4235492;4236840;4242182;4247646;4256187;4259062;4261707;4266333;4275169;4275683;4278635;4281874;4286891;4292623;4290924…
202.630963623505;4223518;4218663;4215559;4211381;4216305;4208808;4209328;4213221;4213057;4216314;4212639;4208690;4204477;4205648;4204728;4208274;4205866;4204875;4206492;4207518;4212252;4219820;4230840;4236894;4245038;4257157;4259594;4267736;4275040;4276500;4278632;4286781;4289258;4290064;4291409;4296121;4302031;4311585;4314300;4316751;4321355;4330479;4330404;4334612;4338004;4342563;4348208;434721…
202.718310005588;4270643;4266059;4262403;4257386;4263244;4255823;4256747;4260388;4259192;4263362;4259812;4255692;4251749;4251360;4250856;4255333;4252444;4251803;4254151;4254086;4258103;4266727;4277949;4283505;4292578;4304344;4306791;4315265;4322761;4323590;4327080;4334934;4338107;4337668;4339784;4344468;4350732;4359473;4362688;4365619;4370136;4379438;4379936;4382765;4386516;4391767;4396377;439696…
202.805643280046;4313272;4309485;4306219;4301489;4306939;4299712;4299274;4302943;4302505;4307013;4303178;4298658;4294772;4294421;4294583;4298221;4296518;4294043;4297162;4297485;4301676;4310272;4320241;4327093;4335978;4347643;4350275;4359556;4366864;4368369;4370479;4379447;4381670;4381777;4383519;4388691;4394887;4403498;4407400;4410144;4414258;4423814;4424218;4428663;4432305;4437025;4442704;444254…
202.892963475358;4352709;4347793;4343469;4339548;4345031;4338256;4336638;4340949;4340439;4343961;4341752;4337082;4332476;4332170;4332703;4335978;4334042;4331722;4335335;4335684;4339784;4347453;4357988;4365068;4374376;4385950;4389424;4397532;4405055;4406463;4408985;4417690;4420319;4420915;4421528;4426979;4433771;4442961;4446362;4449449;4453426;4463804;4463698;4466909;4472056;4476801;4481272;448246…
202.98027062;4392359;4386960;4383038;4378600;4384604;4376946;4375840;4379612;4379771;4383139;4381095;4375830;4372258;4371771;4372008;4374931;4373262;4370822;4374326;4373615;4377839;4387168;4396979;4403906;4413454;4426130;4428587;4437429;4445672;4445992;4448788;4457619;4460420;4460837;4462821;4467969;4474067;4483333;4487029;4490406;4494189;4503719;4503482;4507944;4512959;4518089;4521821;4523167;45…
203.06756474245;4424430;4419304;4415173;4410160;4417188;4409370;4407856;4412329;4411800;4416338;4412708;4407569;4404244;4403747;4404284;4407212;4405459;4402696;4406247;4406126;4410076;4419816;4429805;4436425;4446589;4459279;4461193;4470349;4478721;4478355;4481270;4490386;4493769;4493903;4494952;4500130;4506450;4516511;4520454;4522740;4528989;4536704;4538286;4541388;4546550;4551571;4556406;4557349…
203.154845871186;4453238;4447212;4443245;4438353;4444785;4436851;4434338;4439994;4439409;4443653;4441357;4435748;4431301;4430846;4431197;4434792;4432748;4430267;4434317;4434516;4437612;4447586;4456994;4464706;4473571;4485825;4489492;4499069;4507559;4506642;4511041;4518892;4521871;4522716;4523457;4529268;4535638;4544340;4549500;4552443;4557730;4566441;4566022;4570489;4575419;4580653;4585898;458644…
203.242114034684;4469369;4464157;4460019;4454656;4460655;4453211;4451371;4456275;4456090;4460483;4457437;4452041;4448069;4446880;4447502;4451787;4448798;4446603;4451648;4450203;4455523;4464351;4475146;4481913;4490853;4503423;4507050;4516961;4525078;4524778;4527231;4536705;4539179;4540027;4541391;4547700;4553273;4563405;4567808;4570949;4576097;4584325;4585697;4588360;4593987;4600163;4604448;460460…
203.329369261423;4468605;4463858;4459965;4455574;4460604;4453399;4450184;4455448;4455839;4460185;4457335;4452690;4448097;4447742;4448308;4452263;4449152;4446940;4450756;4450593;4455634;4464210;4473844;4481546;4490257;4503270;4506235;4516588;4524646;4523550;4527659;4536428;4539039;4539879;4540535;4546568;4554167;4563136;4566810;4570410;4574989;4584021;4584875;4588925;4593966;4598773;4604170;460452…
203.41661157988;4467690;4462518;4457857;4453370;4458709;4451528;4449610;4453276;4454129;4458601;4455694;4450548;4447103;4445704;4446435;4450362;4447717;4445490;4449132;4448787;4453579;4462392;4472040;4479372;4488734;4501619;4504778;4513778;4522347;4522134;4525141;4534500;4537051;4537117;4538870;4544703;4551553;4560717;4564610;4568418;4573020;4582487;4582549;4585626;4590732;4595758;4601578;4602440…
203.503841018532;4477791;4473314;4469304;4464382;4469402;4462057;4460172;4465034;4464889;4468857;4466778;4462049;4456953;4456480;4456706;4460706;4458448;4456157;4459805;4458892;4463728;4472883;4482454;4489755;4498789;4511845;4514624;4525007;4532550;4532104;4535496;4545704;4546894;4547457;4549017;4555164;4561923;4571709;4574901;4578926;4583259;4592663;4593506;4597063;4600610;4607181;4611805;461254…
203.591057605856;4505870;4502119;4497402;4492393;4497149;4490010;4487778;4493019;4492566;4496850;4493686;4489504;4485359;4484808;4484729;4488519;4486058;4482889;4487431;4487256;4490894;4500547;4510599;4517306;4526703;4539290;4542471;4552117;4560854;4560644;4563527;4572895;4574874;4574999;4576238;4583197;4589521;4599218;4603448;4606386;4611457;4620556;4621179;4624899;4629031;4634964;4640333;464033…
203.678261370331;4550940;4545911;4541340;4536880;4542326;4534824;4532038;4537212;4537222;4540983;4538078;4532793;4529511;4528124;4528906;4532236;4529697;4527426;4531114;4531038;4535547;4544344;4554555;4561110;4570838;4584309;4587556;4596326;4605105;4604828;4608043;4617234;4620678;4619626;4621444;4628059;4633860;4644355;4648506;4651408;4657140;4665910;4666139;4669966;4674676;4680934;4684691;468606…
203.765452340433;4604052;4599716;4595088;4589995;4595677;4587310;4585301;4589245;4590279;4595064;4591743;4586188;4581754;4581488;4582505;4585264;4583205;4580258;4585027;4584112;4588639;4597767;4608130;4614997;4625514;4638432;4641143;4651729;4659792;4659804;4663082;4672511;4674233;4674773;4677494;4683336;4689646;4699846;4703247;4708127;4713109;4721064;4721781;4725617;4731007;4735762;4741656;474210…
203.85263054464;4656645;4651168;4647503;4641627;4648096;4640389;4637417;4642286;4642391;4647280;4643039;4638250;4634524;4633200;4634580;4637511;4635118;4632410;4637213;4636268;4641124;4650263;4660371;4668620;4678235;4691056;4694120;4705009;4713599;4712895;4716217;4726153;4728492;4728967;4730949;4736494;4743849;4753998;4758474;4761534;4766900;4776348;4776250;4779977;4785333;4791585;4795795;4796871…
203.939796011429;4701484;4696775;4691614;4686428;4691808;4684274;4681701;4685960;4687565;4691194;4687802;4682635;4678806;4678020;4678342;4681579;4678961;4677036;4681210;4679814;4685190;4694313;4704886;4712946;4723023;4736385;4738957;4749530;4758769;4758881;4761863;4771157;4774824;4774073;4775803;4782588;4789476;4800086;4803679;4807329;4812360;4822308;4823272;4826640;4831989;4837493;4843310;484457…
204.026948769279;4737276;4732006;4726454;4722140;4727837;4720569;4717000;4721528;4722529;4726832;4723093;4718659;4714178;4712541;4713502;4717069;4714534;4712286;4716974;4715959;4720235;4730469;4741360;4748338;4758901;4772504;4776470;4785627;4795139;4794893;4798667;4808502;4811968;4811371;4813052;4818959;4826734;4836877;4841388;4844535;4849992;4860474;4860939;4865169;4870438;4875623;4880849;488238…
204.114088846665;4762801;4757409;4753248;4747535;4753922;4745049;4742143;4747343;4748042;4754237;4749296;4743660;4738934;4738004;4739292;4742434;4740127;4738174;4742339;4741129;4746135;4755352;4766880;4774735;4785232;4797804;4801595;4812611;4821948;4821643;4825098;4834953;4837912;4838453;4840125;4846267;4854263;4864011;4868959;4871862;4877083;4888181;4887759;4891834;4897380;4903496;4908519;491054…
204.201216272067;4778812;4773437;4767813;4762733;4769092;4761458;4758734;4763757;4763868;4768975;4765240;4758987;4754739;4753698;4755026;4758673;4755601;4753133;4758067;4756633;4761354;4771797;4782392;4790934;4801057;4814297;4818803;4828773;4837814;4838048;4841348;4851152;4854984;4853907;4856523;4863166;4870061;4880825;4884879;4888796;4894192;4904399;4903781;4908252;4914103;4919854;4925657;492605…
204.28833107396;4792860;4786464;4782946;4776693;4782928;4775229;4772448;4777537;4777172;4782044;4778918;4772290;4768158;4767683;4767487;4772100;4768979;4766633;4770951;4770539;4774586;4785345;4795377;4802875;4814247;4828560;4831571;4842582;4851452;4851632;4854498;4864592;4868185;4868078;4869963;4876410;4884077;4894313;4897747;4902181;4907471;4917918;4918561;4922395;4928069;4934029;4940081;4940343…
204.375433280823;4818204;4813016;4808524;4802040;4808780;4800013;4799206;4802697;4802598;4807914;4804395;4797799;4794619;4793957;4793719;4796855;4794758;4792419;4796633;4796326;4800224;4810924;4821714;4829698;4839910;4854927;4857252;4868612;4877055;4877801;4881365;4891077;4894008;4894163;4896390;4902142;4909744;4920764;4924408;4928613;4934733;4943732;4944458;4948420;4953865;4959249;4966132;496708…
204.462522921133;4855041;4848993;4845468;4839086;4845864;4837274;4834682;4838795;4839903;4844042;4840824;4834213;4830768;4829586;4830057;4834290;4830850;4829562;4832370;4831485;4837436;4846989;4857413;4865908;4876612;4891430;4894368;4905460;4913636;4914992;4917432;4928385;4931469;4931309;4932805;4939973;4947850;4958093;4961871;4965435;4970819;4981072;4981249;4985342;4991497;4996567;5003025;500450…
204.549600023368;4903241;4897803;4892972;4887315;4893898;4884966;4882836;4887174;4886794;4892667;4889454;4882536;4878773;4877546;4877674;4882014;4879175;4876050;4880735;4879647;4885307;4895519;4907293;4914929;4925971;4940208;4942621;4953868;4963164;4963551;4967482;4976682;4980229;4980229;4982525;4988318;4995918;5007279;5011994;5014503;5020719;5032041;5031586;5035782;5040771;5047210;5053197;505450…
204.636664616004;4954432;4948966;4944398;4939096;4945423;4936048;4933981;4939306;4939290;4943579;4940508;4934739;4929176;4927922;4928326;4933717;4930306;4927865;4933075;4931948;4935898;4947927;4958451;4966519;4978692;4992079;4995180;5006371;5016368;5016325;5020224;5030141;5033234;5033349;5035587;5041814;5048995;5060289;5065799;5069038;5074525;5085162;5085356;5089217;5094751;5101890;5107365;510868…
204.72371672752;5002341;4995478;4991632;4984759;4990721;4983070;4980599;4986115;4986013;4990632;4987649;4980841;4975133;4974894;4975632;4980769;4977958;4973975;4978747;4978243;4983279;4995101;5005906;5013901;5024989;5039134;5042949;5053778;5064496;5063537;5067829;5077910;5081334;5081596;5083850;5089666;5097571;5109684;5113717;5117279;5123566;5133890;5134416;5138242;5144495;5150356;5155930;5157250…
204.810756386393;5043475;5037132;5032721;5025690;5033463;5024452;5022264;5027471;5027331;5031623;5028263;5023106;5017124;5016636;5017210;5021290;5018749;5016009;5019842;5020082;5025577;5035969;5048232;5055611;5067414;5081987;5085862;5097290;5106966;5107568;5110785;5120793;5123300;5124523;5126569;5132789;5141069;5152985;5157803;5160705;5166908;5177220;5177299;5182551;5187863;5194225;5200219;520174…
204.8977836211;5083018;5076277;5072521;5065278;5072358;5062699;5061447;5066248;5066250;5071006;5067640;5061505;5056354;5056265;5056981;5060948;5057198;5055722;5059970;5058622;5064630;5075602;5088461;5095858;5107599;5121682;5126205;5136952;5147119;5148075;5151713;5162241;5164575;5166303;5167570;5174392;5182056;5193476;5198137;5201788;5207704;5218344;5218607;5222536;5228704;5235536;5240660;5242048;…
204.984798460118;5119840;5113255;5108100;5102805;5109902;5099706;5099358;5103936;5103500;5107557;5104331;5097428;5093324;5091860;5093129;5097574;5095032;5093052;5097276;5096814;5101265;5113047;5125597;5134203;5145222;5160935;5164185;5175446;5185038;5186342;5189598;5200201;5203431;5204099;5205641;5212655;5220306;5232467;5237472;5240260;5247208;5256986;5258929;5262301;5268082;5275467;5281048;528093…
205.071800931926;5149434;5143733;5139677;5133539;5140392;5130183;5130644;5135754;5134668;5138089;5135448;5129405;5124125;5124559;5123449;5128009;5125627;5124779;5127930;5127970;5132919;5144447;5157994;5164555;5178163;5192190;5197027;5207364;5217301;5219550;5222516;5233190;5236591;5237369;5239791;5245408;5253752;5265057;5270742;5273128;5279871;5290866;5291507;5295812;5301107;5308077;5313673;531346…
205.158791065;5177935;5171697;5167787;5162531;5168905;5159389;5159281;5164777;5163486;5167803;5163288;5157795;5152774;5152519;5152482;5157082;5155401;5153679;5156791;5156918;5163091;5173208;5188130;5195120;5207371;5223610;5228334;5238065;5247928;5250567;5254082;5263557;5267369;5268874;5270972;5275717;5283552;5296241;5301493;5304811;5310392;5322464;5322496;5326630;5332085;5339330;5344599;5345477;5…
205.245768887818;5209528;5202463;5199321;5192700;5200530;5189731;5191907;5196597;5194010;5198454;5194383;5189055;5183764;5183798;5183622;5188569;5186737;5184078;5187449;5187626;5194830;5205346;5220696;5227367;5240707;5256455;5261221;5271052;5281295;5283667;5286150;5296479;5300831;5302952;5304512;5309643;5317768;5330287;5334136;5338067;5343322;5356470;5356162;5360554;5366288;5372651;5377945;537858…
205.332734428858;5244416;5236140;5233061;5228266;5234760;5224002;5227244;5232209;5229332;5232074;5229088;5223410;5218092;5218189;5216874;5222526;5221405;5218540;5222840;5223174;5229713;5240405;5257424;5263688;5276230;5291077;5297832;5305928;5316371;5319127;5323466;5333262;5337063;5338351;5340626;5345472;5353070;5366474;5371445;5373308;5380429;5393031;5394009;5397689;5401414;5410562;5415142;541556…
205.419687716596;5275582;5268409;5265550;5259447;5266727;5255271;5258089;5264295;5260741;5263842;5260102;5255053;5249126;5250102;5248989;5254674;5253439;5251416;5254057;5255356;5262070;5272983;5288979;5295613;5309037;5325010;5330706;5340022;5348921;5352445;5356061;5366981;5370828;5373234;5373820;5378344;5387302;5400114;5405252;5407104;5413742;5426568;5427434;5431131;5436146;5443291;5450251;544887…
205.506628779511;5307207;5299862;5296580;5290788;5298988;5286926;5290850;5295937;5291617;5295138;5291449;5287299;5280859;5282032;5281043;5285863;5284183;5282471;5285491;5286223;5293755;5304728;5321506;5328382;5341703;5357469;5363074;5371945;5380837;5385893;5388899;5398978;5403979;5405688;5406560;5411649;5419374;5432479;5437665;5440745;5447426;5460246;5460246;5464771;5468543;5477944;5482833;548198…
205.59355764608;5344724;5337348;5335022;5328332;5335772;5324485;5329221;5333177;5329599;5333370;5329257;5325094;5317568;5319764;5317780;5324115;5321046;5320275;5323473;5324026;5330781;5341889;5359656;5365849;5379048;5395854;5401380;5410770;5420581;5424383;5427975;5437542;5442503;5443986;5445889;5449753;5458843;5472704;5476812;5478593;5485175;5500221;5499333;5503423;5508538;5516401;5522221;5521577…
205.68047434478;5385527;5378901;5376090;5369153;5376036;5363805;5369570;5374245;5370155;5372883;5370186;5364905;5358382;5359948;5359136;5364761;5362445;5360449;5363693;5365179;5372578;5382867;5399853;5406947;5420142;5436887;5443067;5452072;5462272;5465380;5468456;5479511;5484516;5485028;5487613;5491790;5499564;5513126;5519634;5520774;5528016;5540900;5542005;5545578;5551273;5558664;5565337;5563473…
205.767378904088;5434336;5425968;5423037;5416368;5424412;5411609;5415775;5421087;5416980;5420603;5417095;5412374;5406091;5406490;5405420;5411439;5409174;5407370;5410323;5411021;5419061;5429261;5446242;5453610;5466817;5483946;5490705;5499644;5509173;5512480;5516231;5526920;5531332;5534241;5534485;5539718;5548830;5561505;5567105;5568970;5575965;5589108;5590202;5594422;5598746;5607034;5612684;561286…
205.854271352483;5475618;5468222;5465409;5458321;5465496;5454996;5457717;5463079;5459795;5463973;5458517;5453965;5447231;5448103;5447402;5453591;5450947;5448960;5452059;5452887;5460782;5471500;5488400;5495306;5510104;5526565;5532090;5541505;5551996;5555169;5558118;5570029;5574647;5575231;5576795;5583363;5591080;5604889;5610160;5612145;5618502;5633588;5633533;5637408;5642958;5651368;5657930;565566…
205.941151718441;5520748;5513576;5510110;5503503;5511162;5499561;5501959;5506661;5504545;5508946;5505166;5498436;5492821;5492565;5492034;5497373;5494663;5493397;5496304;5497777;5503791;5515514;5533011;5540232;5553677;5570578;5576400;5586602;5596830;5599590;5603074;5613979;5618987;5620653;5621508;5627571;5637260;5650162;5654685;5658099;5664196;5677962;5678912;5683453;5688771;5696202;5701993;570255…
206.02802003044;5565157;5558580;5554155;5547668;5555705;5543144;5544724;5550059;5549281;5553559;5548656;5542675;5536243;5537207;5535841;5541259;5539309;5536841;5540956;5541464;5547550;5558927;5575418;5583591;5598078;5613856;5619404;5630776;5641910;5644078;5647128;5658248;5663318;5664516;5666327;5672223;5681083;5694162;5699994;5703273;5710407;5724091;5724333;5729190;5734311;5741473;5748031;5748752…
206.114876316957;5608690;5602630;5597361;5590169;5597209;5588044;5586349;5592755;5592191;5596277;5591800;5584987;5579974;5579955;5579768;5584150;5583166;5579403;5584604;5583069;5590823;5602172;5618460;5626495;5639829;5657586;5662951;5674473;5685151;5686311;5691102;5702195;5706719;5707561;5708895;5716489;5725880;5737820;5744776;5747402;5754888;5767659;5767613;5773356;5778815;5786748;5792449;579317…
206.201720606471;5653223;5647401;5641622;5634846;5641993;5631561;5630176;5636374;5634746;5639992;5637023;5629380;5622999;5623346;5623318;5628221;5624960;5623063;5627628;5627016;5633951;5646599;5661735;5670073;5683474;5701154;5707076;5718052;5729907;5730722;5735107;5746255;5750599;5751634;5753049;5761182;5769863;5783157;5789266;5793534;5799331;5812226;5813287;5817979;5822937;5831427;5837847;583819…
206.288552927457;5704505;5697288;5691695;5683898;5692254;5680393;5680863;5685473;5685755;5690212;5685279;5677962;5672462;5672695;5672894;5677228;5674467;5672419;5676401;5676697;5684081;5695344;5710919;5719394;5733295;5750431;5756029;5767445;5779448;5781783;5785039;5796550;5800459;5801330;5803632;5811267;5819486;5833235;5839588;5842654;5850048;5863590;5863448;5868530;5875056;5882715;5889643;588995…
206.375373308395;5755976;5749105;5742099;5735243;5743227;5733138;5731121;5736138;5735922;5741654;5736980;5730315;5723910;5721934;5723858;5727920;5725533;5723442;5728045;5727166;5733251;5745296;5761977;5770607;5783400;5802473;5806219;5819338;5831220;5832678;5836111;5848487;5851666;5852949;5855287;5862705;5872109;5887099;5891529;5895161;5903234;5915934;5916165;5921067;5928955;5935702;5942058;594292…
206.46218177776;5798216;5791923;5785065;5777139;5785431;5774636;5773452;5778747;5779360;5783619;5779679;5772009;5765381;5765944;5766162;5770874;5767496;5763558;5770428;5768832;5775710;5788364;5803086;5813438;5826576;5844732;5849519;5862860;5873904;5874388;5879240;5891004;5895369;5895061;5896453;5905879;5915217;5929588;5934913;5939514;5947096;5959631;5959804;5965370;5970986;5979733;5986337;5987687…
206.548978364031;5845194;5838168;5831238;5824401;5833152;5821916;5817950;5823810;5824686;5830936;5825925;5819110;5812578;5811548;5812640;5816945;5814508;5810725;5815911;5815163;5820772;5835002;5848976;5859164;5873434;5890712;5896374;5909804;5921501;5921492;5926529;5937855;5942272;5943646;5944475;5953816;5962897;5977157;5983332;5987533;5994171;6007711;6008028;6012549;6020255;6028282;6034927;603660…
206.635763095685;5884618;5877940;5871079;5862871;5870317;5860214;5857760;5863033;5864430;5870159;5865559;5858457;5851594;5849946;5851531;5855730;5853043;5850083;5854538;5854136;5860630;5872655;5888283;5898454;5913024;5929911;5934938;5948708;5961635;5962011;5965674;5978165;5982734;5982280;5985196;5993279;6003612;6018196;6023341;6027502;6034255;6048230;6048532;6052301;6061487;6069322;6075650;607767…
206.7225360012;5928770;5921964;5915134;5907948;5915652;5904578;5902727;5907771;5908466;5914305;5909036;5902562;5895415;5894722;5895932;5900270;5898060;5894115;5899190;5898434;5904737;5917644;5932524;5943128;5957409;5975809;5979675;5994953;6006744;6006524;6011098;6024255;6027556;6028076;6030507;6039818;6048503;6063011;6068467;6073041;6080929;6094039;6095024;6099210;6106853;6115027;6122755;6123734;…
206.809297109052;5970949;5964229;5957240;5950542;5957371;5946475;5942992;5949628;5949681;5955567;5951810;5943905;5938105;5936359;5937499;5942519;5938554;5935338;5940355;5940057;5946546;5959535;5974609;5984877;6000068;6018191;6022106;6037539;6048975;6048632;6053887;6067142;6070245;6070776;6073472;6081784;6091678;6106883;6112134;6116945;6123801;6137876;6137350;6143604;6150922;6159547;6166327;616756…
206.89604644772;6007364;6001069;5993670;5986601;5994613;5982619;5979130;5985036;5986109;5991678;5987651;5980569;5973827;5971409;5973946;5978244;5974919;5969719;5978079;5976537;5982664;5996603;6011570;6020843;6035246;6055017;6059812;6073361;6085252;6086605;6090365;6104005;6106749;6108089;6110413;6119681;6128389;6144265;6149576;6154369;6161798;6174703;6176740;6180532;6189466;6196882;6203536;6206277…
206.982784045681;6051236;6044903;6036837;6030001;6037726;6026419;6022264;6028917;6029719;6036580;6031849;6024422;6018052;6015534;6016459;6022049;6019453;6014417;6020420;6019774;6026221;6040255;6054849;6065876;6080199;6097635;6103628;6118219;6130731;6130746;6134932;6147910;6152168;6151651;6154931;6164552;6173926;6189101;6193097;6200208;6206303;6221239;6221582;6226433;6234348;6242462;6248990;625076…
207.069509931412;6091171;6084131;6077067;6069084;6076520;6065115;6061869;6067808;6069313;6075493;6070056;6061965;6056123;6055308;6055531;6061679;6057015;6053322;6059509;6058438;6064176;6079108;6093704;6104822;6118444;6138025;6142445;6158134;6169423;6169048;6173127;6187533;6193155;6191582;6195239;6203338;6213554;6229173;6234314;6239232;6247543;6261697;6262508;6267066;6275414;6282108;6289339;629261…
207.15622413339;6126198;6120444;6111929;6103834;6112543;6101067;6096967;6104120;6104021;6111324;6106246;6098364;6092082;6090130;6091402;6095827;6092062;6088798;6094672;6093525;6100321;6114038;6128313;6139870;6155829;6173172;6179151;6194022;6206319;6206327;6210413;6223719;6228899;6228219;6230651;6239751;6250587;6265684;6272107;6275885;6283893;6298521;6297968;6304268;6311033;6319982;6328088;6330341…
207.242926680094;6177919;6170974;6164028;6155022;6163862;6152550;6149184;6153830;6154499;6163165;6157288;6148694;6142585;6140616;6142153;6147999;6143523;6139156;6145541;6143714;6150676;6165686;6179692;6192275;6206571;6225716;6230727;6246242;6257709;6257709;6263938;6277675;6281593;6279798;6283894;6292761;6302975;6318558;6323870;6329247;6337433;6350815;6352168;6356872;6365606;6373836;6380399;638403…
207.3296176;6239443;6232341;6225461;6217460;6225643;6214491;6209476;6215916;6218065;6224172;6219393;6210176;6204170;6201884;6202923;6209257;6205226;6200678;6207335;6206056;6212640;6227910;6243026;6253657;6268905;6288249;6292918;6308645;6321278;6321150;6326711;6339639;6343920;6344100;6347044;6356098;6366181;6382230;6388162;6392868;6401489;6414822;6415590;6422055;6429673;6437060;6445698;6447439;645…
207.416296921586;6298097;6291548;6283552;6274434;6283583;6271264;6267934;6273718;6275431;6282392;6276927;6268579;6261097;6260668;6261211;6265583;6262663;6257989;6265199;6264291;6270531;6286333;6300163;6311933;6327575;6347237;6352100;6368423;6381018;6379463;6384721;6398122;6404120;6403035;6406071;6415563;6425138;6441784;6447514;6452087;6459850;6474721;6475257;6481025;6488962;6496865;6506078;650837…
207.50296467333;6359638;6352074;6343042;6335525;6344157;6332869;6328505;6335118;6334806;6342534;6337229;6329442;6321228;6320780;6320894;6327330;6323173;6319522;6326630;6325964;6331761;6346805;6360781;6373798;6388445;6407986;6413591;6429820;6442481;6441739;6446304;6460662;6465209;6465980;6468186;6478264;6488241;6504594;6510006;6515260;6522940;6538780;6538315;6544521;6552542;6561392;6569296;6572027…
207.589620883708;6415456;6407673;6399410;6391958;6400302;6388166;6383559;6390555;6391836;6398455;6393687;6384575;6378020;6377499;6377402;6383110;6378760;6375627;6381798;6379873;6386772;6402360;6416979;6429882;6444766;6465067;6470122;6487225;6500197;6499296;6502600;6518805;6522706;6522382;6525271;6535193;6547082;6561876;6568118;6573311;6581940;6596252;6596738;6602820;6610321;6618978;6627646;662975…
207.676265581199;6471429;6463359;6455560;6447402;6455942;6444136;6438992;6444630;6446447;6453588;6449247;6439906;6433892;6431336;6432308;6438471;6433916;6429911;6437132;6435719;6442439;6458216;6472598;6485983;6501691;6520425;6526430;6542540;6556577;6554240;6560652;6574416;6579179;6579272;6582879;6591770;6602879;6619763;6625810;6630319;6638765;6654127;6653206;6658947;6668816;6677476;6684719;668799…
207.76289879428;6523028;6514444;6507650;6499570;6507714;6495840;6490379;6496831;6499248;6504870;6500710;6491545;6484915;6482866;6483680;6489762;6485265;6480901;6488532;6487460;6493509;6508981;6524766;6535915;6553135;6573740;6578057;6595575;6609122;6607489;6613478;6628213;6632425;6632215;6635815;6646344;6657123;6673317;6679258;6684326;6692336;6707517;6708535;6714312;6722862;6731387;6740435;6743345…
207.849520551428;6581520;6574341;6565751;6557991;6566614;6554362;6548417;6556390;6558331;6565470;6559581;6550115;6543047;6542104;6542775;6548506;6544613;6539258;6547121;6546898;6553129;6568273;6584785;6595791;6611666;6634099;6639108;6656103;6668954;6668764;6674068;6689577;6693681;6694251;6696145;6706208;6717319;6734776;6740553;6746156;6753570;6769501;6769679;6775665;6784070;6794046;6802551;680437…
207.93613088112;6643225;6636076;6627985;6619906;6628074;6615835;6609833;6617266;6619550;6625724;6620879;6611069;6604408;6602094;6603440;6609570;6605381;6600684;6607324;6606588;6613458;6629330;6646680;6657657;6673960;6695663;6699645;6717652;6732133;6731800;6736222;6752335;6756808;6755145;6758979;6769766;6782269;6798059;6803929;6808311;6816672;6832791;6832834;6839237;6847454;6856479;6866382;6867683…
208.022729811835;6703667;6697171;6687225;6678901;6688708;6675926;6669736;6678715;6680223;6686806;6681074;6670951;6664693;6663172;6663340;6670182;6664498;6660117;6667538;6666962;6674296;6690519;6706542;6719420;6735167;6756831;6762198;6779055;6792840;6793435;6798484;6813778;6818625;6817692;6820995;6831411;6840923;6858829;6865853;6871636;6880022;6895839;6895697;6901917;6911010;6920007;6929622;693134…
208.109317372049;6759584;6752138;6743815;6734336;6743528;6729920;6726070;6732501;6734059;6741472;6736008;6725702;6719684;6717025;6719100;6722999;6720463;6716197;6722965;6722479;6729781;6744963;6762007;6774535;6791533;6811706;6818683;6836322;6849197;6848863;6854728;6869132;6874429;6875329;6878322;6887403;6898999;6916158;6923064;6928100;6935986;6953754;6954278;6959757;6970502;6977182;6986808;698920…
208.19589359024;6820349;6812608;6803065;6795294;6804435;6790733;6785957;6792165;6793935;6802758;6797476;6786794;6780237;6778098;6779139;6784980;6781831;6776502;6784193;6782338;6789277;6806040;6823829;6834589;6852263;6873723;6879124;6897184;6910921;6910949;6915986;6932260;6936734;6936227;6939120;6950185;6962521;6978831;6985853;6990891;7000470;7015960;7016821;7022774;7031049;7040224;7050710;7052418…
208.282458494885;6890644;6882484;6873849;6864871;6874068;6860515;6857240;6862938;6864235;6871901;6866837;6856449;6848904;6847249;6848238;6854376;6849649;6845267;6853727;6851207;6860141;6876048;6893499;6906386;6922033;6946422;6950039;6968392;6982376;6982536;6987054;7003464;7007346;7009198;7010832;7022914;7034262;7050571;7058415;7063356;7072444;7088699;7088307;7095350;7104710;7113431;7123241;712537…
208.369012114463;6961609;6953630;6945159;6935475;6944240;6930276;6926895;6932570;6934247;6942290;6936278;6926478;6920379;6917227;6920056;6925960;6921021;6915975;6923947;6922158;6930070;6947006;6963458;6976668;6994685;7016199;7022820;7039871;7053743;7054157;7059336;7075833;7080501;7081373;7084116;7095118;7106323;7124880;7130342;7136650;7145388;7161624;7162125;7168698;7178497;7186481;7196901;719843…
208.455554477449;7033395;7026031;7017467;7007331;7016928;7003643;6999297;7005538;7007821;7015736;7009196;6999137;6992065;6990297;6991200;6996968;6992794;6989067;6995135;6994889;7003090;7019888;7036126;7050125;7066475;7090457;7095492;7113550;7128801;7127587;7134040;7150046;7155031;7154969;7158264;7167947;7180750;7199548;7204922;7211262;7220925;7237667;7236903;7244591;7253857;7262176;7272214;727479…
208.542085612323;7093601;7085889;7076802;7065947;7076501;7062424;7058555;7065621;7067175;7074462;7068988;7058740;7050522;7049139;7050016;7057075;7052742;7047876;7055548;7054269;7062040;7079405;7095351;7109566;7126829;7149602;7155194;7175159;7188248;7189070;7195118;7209787;7215487;7216461;7219071;7230115;7242348;7260425;7267837;7274911;7281624;7299084;7299600;7306746;7314188;7324792;7334131;733741…
208.62860554756;7150263;7142451;7133079;7123028;7134114;7119314;7115701;7121794;7123851;7131643;7126142;7116033;7107448;7106536;7106978;7113525;7109000;7104880;7111578;7112006;7119218;7136681;7153663;7167373;7185150;7208257;7214675;7232877;7246464;7247720;7253209;7269144;7274890;7276192;7278811;7288784;7301197;7320135;7326142;7332585;7341123;7358306;7359715;7365841;7374499;7385124;7393279;7397444…
208.715114311639;7216792;7208343;7198686;7189333;7200873;7184906;7181530;7189035;7190103;7197579;7192014;7182647;7174080;7172716;7172720;7179705;7176473;7169784;7177720;7177523;7184777;7203128;7220822;7234199;7252923;7275884;7281632;7300807;7315663;7315878;7320815;7338313;7343030;7342835;7345800;7357654;7369982;7388696;7396076;7401853;7411801;7427648;7428257;7434521;7444339;7454395;7463530;746600…
208.801611933037;7287182;7277992;7268725;7260468;7270264;7256055;7251961;7260036;7260439;7267962;7262397;7251716;7243923;7241995;7241973;7250243;7246002;7240460;7248821;7247192;7255042;7273580;7291199;7304829;7324543;7348073;7353641;7372174;7386705;7387970;7392746;7409924;7415503;7415615;7419217;7430479;7442829;7462070;7467165;7474379;7484327;7501122;7502230;7508665;7517979;7527252;7536787;753969…
208.888098440232;7351057;7342523;7334356;7325063;7335338;7320872;7316374;7323382;7326124;7331690;7326746;7316533;7308096;7306584;7307706;7315181;7310962;7305357;7312859;7311883;7320659;7339206;7358234;7371452;7390460;7414574;7421194;7438137;7454329;7455397;7460108;7477338;7483564;7483194;7487074;7498351;7509949;7529343;7535905;7543400;7551308;7570877;7571964;7576682;7586063;7598206;7605570;760874…
208.9745738617;7420623;7410978;7402867;7393454;7403720;7388867;7386682;7395081;7392791;7399136;7394227;7385549;7376386;7375135;7375015;7382657;7378845;7374863;7382372;7380512;7389325;7407778;7428403;7442092;7461453;7485455;7491231;7510650;7524469;7527401;7532910;7548809;7554175;7555578;7558938;7570740;7581462;7601067;7609124;7614330;7624721;7642648;7642617;7651006;7659494;7668920;7678567;7680808;…
209.06103822592;7482203;7473747;7464442;7455603;7467002;7450063;7448006;7458024;7455189;7462122;7456667;7448056;7438067;7437569;7437420;7446084;7442430;7437229;7444623;7444035;7453047;7470247;7492568;7505063;7525550;7549541;7556524;7574650;7590459;7592467;7598018;7613526;7620843;7621094;7624994;7633953;7647410;7666591;7674937;7680989;7689947;7709800;7708860;7716660;7724611;7735691;7745186;7746963…
209.147491561369;7547010;7535963;7528718;7519359;7530942;7512476;7513664;7521836;7519611;7525807;7520352;7511086;7502320;7501851;7500716;7509684;7504463;7502170;7508181;7507823;7516827;7534561;7557177;7570623;7590409;7616444;7621847;7639747;7655864;7658240;7664152;7679792;7687414;7688228;7691612;7700868;7713760;7733816;7742097;7746769;7757150;7776915;7777058;7782382;7791915;7802281;7812128;781246…
209.233933896523;7617343;7605635;7599677;7589939;7600695;7583010;7584282;7592711;7589865;7597055;7590902;7581780;7572726;7571755;7570653;7580564;7575734;7571940;7578801;7579135;7588093;7605693;7628366;7642083;7662265;7687138;7695061;7711046;7727823;7729592;7737013;7752331;7760024;7761253;7764402;7774334;7787702;7807144;7815795;7820715;7830427;7849802;7850302;7857244;7864398;7876470;7886167;788727…
209.320365259862;7689599;7678362;7670999;7660365;7672482;7654907;7657510;7664461;7661900;7668008;7661275;7653492;7643358;7642905;7642327;7651283;7646678;7643778;7649709;7649788;7659503;7678166;7702007;7714382;7735189;7759701;7768169;7785368;7801141;7804757;7810036;7826812;7833666;7835447;7838776;7848705;7861313;7881566;7888784;7893991;7903745;7923771;7923864;7931714;7940353;7951701;7962424;796244…
209.406785679862;7764198;7754394;7747515;7736668;7748961;7731201;7733226;7740319;7738422;7744124;7737787;7729484;7718842;7718079;7717537;7727570;7722434;7718784;7725074;7725599;7736172;7753388;7776539;7790935;7811095;7837169;7845386;7862500;7878254;7881637;7886493;7904881;7911142;7913297;7916226;7926762;7939785;7959685;7966668;7973035;7983528;8004274;8004668;8010825;8019017;8032401;8041180;804236…
209.493195185;7844062;7832844;7825577;7814886;7826844;7808550;7809876;7817996;7816825;7821966;7816613;7806612;7797212;7796071;7796027;7805318;7799724;7796792;7803361;7804364;7813699;7831522;7856522;7869885;7890937;7917560;7925473;7941366;7958212;7963269;7967535;7985475;7992592;7994157;7995981;8007463;8020802;8040803;8049088;8055276;8064344;8084864;8085242;8092214;8101356;8113824;8123550;8124414;8…
209.579593803754;7910381;7899199;7890656;7880383;7892777;7873978;7875661;7883402;7881322;7889023;7881749;7871806;7862417;7861911;7860955;7869720;7864857;7862344;7867629;7869124;7879158;7898014;7922181;7934815;7956809;7982733;7991086;8008766;8026137;8028883;8033858;8052707;8058856;8060730;8063696;8074221;8086627;8107836;8116400;8122652;8132523;8153441;8154593;8160480;8170657;8182463;8192533;819340…
209.665981564602;7986272;7976524;7969196;7958487;7969851;7951698;7953352;7961132;7958522;7965244;7959205;7949934;7939043;7939320;7937714;7947229;7943086;7938050;7945742;7945475;7956524;7973705;7998921;8012681;8035081;8060769;8068519;8087974;8105519;8107512;8112836;8131328;8137806;8139427;8143025;8154779;8167167;8189643;8197118;8203267;8213344;8234020;8234834;8240836;8251377;8264159;8273823;827496…
209.75235849602;8084484;8072382;8064070;8054261;8066024;8048734;8047442;8055163;8053657;8061207;8055171;8044254;8034498;8035034;8033712;8041689;8037723;8032260;8040795;8040816;8050902;8070210;8093588;8107942;8130451;8157582;8165300;8183366;8201476;8203705;8209769;8227991;8235559;8235978;8239743;8250546;8264505;8286848;8294549;8301222;8312059;8332557;8334144;8339608;8350450;8361263;8371982;8374025…
209.838724626487;8180395;8169491;8161077;8148947;8161925;8143885;8142057;8151393;8149672;8157885;8151216;8139239;8129850;8129091;8129988;8138260;8132656;8127273;8136351;8134843;8147176;8167052;8188693;8204054;8225865;8253756;8262321;8281304;8298410;8300563;8306373;8325248;8333021;8334664;8336611;8347282;8362334;8385020;8392669;8398812;8409638;8431259;8431108;8439086;8447987;8460836;8471990;847538…
209.92507998448;8274989;8265441;8255962;8245080;8257429;8238046;8235907;8246723;8245430;8253256;8245999;8235042;8224295;8224453;8224964;8231095;8226954;8222845;8231192;8230750;8238926;8259683;8282832;8298915;8322003;8348736;8356771;8377481;8394739;8396343;8402788;8420769;8428198;8429730;8433247;8445432;8458787;8481883;8490160;8496164;8507538;8528081;8528991;8536412;8546862;8559482;8569784;8571790…
210.011424598476;8359894;8348585;8339377;8329322;8340521;8322928;8319006;8327191;8328973;8336677;8329297;8318140;8307505;8306162;8307442;8315335;8310846;8305068;8312953;8312931;8321694;8343981;8367268;8382821;8404647;8431165;8440452;8462131;8477039;8479821;8486828;8505538;8511988;8513956;8517847;8530009;8544855;8567353;8575129;8582591;8592980;8614522;8614885;8622587;8632267;8645290;8655479;865752…
210.097758496952;8451409;8441325;8431106;8419492;8431802;8413334;8410021;8418477;8418403;8427954;8420472;8408510;8399910;8397895;8398776;8406676;8401550;8396497;8405220;8403116;8413288;8434138;8457330;8472653;8495609;8524573;8530902;8552795;8571751;8571957;8579334;8598631;8605731;8605703;8609353;8623144;8638384;8660097;8668587;8675380;8687754;8708998;8709303;8716907;8727510;8739951;8751379;875360…
210.184081708387;8549841;8538467;8527482;8515711;8529278;8510540;8507231;8516285;8515064;8525781;8518575;8505842;8495582;8493324;8496139;8503154;8497211;8491927;8501191;8500712;8509464;8530930;8553576;8570756;8592881;8622300;8629005;8652714;8668356;8670525;8677496;8697533;8705399;8704896;8708447;8722152;8736405;8759820;8768717;8775915;8787430;8809449;8808836;8818080;8827771;8840485;8852570;885623…
210.270394261257;8646805;8638156;8627581;8615020;8626892;8608649;8603346;8612475;8613364;8622651;8616679;8603355;8593134;8591268;8592328;8600397;8594028;8589591;8598916;8598202;8606413;8630570;8651918;8668008;8691332;8719422;8727418;8750283;8768835;8769159;8776668;8797299;8804071;8804337;8807640;8821565;8838249;8860261;8868420;8877035;8888878;8910478;8911213;8918865;8928695;8942064;8954420;895811…
210.35669618404;8740545;8730172;8718365;8706840;8718247;8700065;8694033;8703519;8705830;8715498;8706156;8694119;8685419;8682314;8682469;8691861;8687173;8679737;8689140;8687988;8698181;8721777;8744313;8759368;8783051;8812405;8820644;8843135;8861537;8862080;8870156;8890234;8896366;8898835;8901442;8916458;8931387;8954193;8963863;8971193;8982670;9004639;9005718;9012394;9025456;9038030;9049624;9053709…
210.442987505213;8833140;8822014;8810600;8798875;8811682;8792405;8787414;8796392;8797782;8806388;8799886;8786427;8776269;8772991;8774850;8782846;8778807;8770991;8781361;8779267;8791332;8811368;8834689;8853196;8875306;8905671;8913322;8937750;8957147;8955453;8963238;8985185;8992804;8992112;8996182;9010647;9025550;9049689;9058991;9066872;9078659;9101705;9101390;9109637;9122205;9133841;9145685;915105…
210.529268253255;8918808;8908795;8896243;8883269;8896927;8877881;8871598;8881029;8882043;8892529;8884377;8871272;8860978;8859143;8861374;8868309;8862953;8855917;8866581;8864597;8874129;8897136;8919274;8938292;8961419;8992092;8998763;9023868;9042696;9043046;9050209;9071148;9078514;9079488;9083653;9099192;9113542;9136549;9147120;9155084;9166506;9189447;9189012;9198833;9211252;9223615;9235215;923903…
210.615538456641;9006949;8996766;8983657;8971446;8984412;8965812;8958367;8968256;8969670;8979783;8972305;8959427;8949648;8946816;8947409;8956559;8949380;8942811;8954172;8954247;8960155;8985248;9008076;9026019;9049638;9082078;9088760;9112512;9132184;9132673;9139590;9162226;9169043;9168948;9174235;9188272;9204790;9228862;9237757;9246863;9259146;9281060;9280597;9290359;9301682;9314446;9326956;933162…
210.701798143851;9109487;9097039;9083943;9074569;9084732;9066420;9060252;9068338;9071843;9081166;9075042;9059512;9048674;9045606;9047434;9057318;9050674;9044534;9054199;9052908;9062626;9085569;9109797;9128333;9151722;9183359;9190588;9216166;9235989;9235688;9243363;9265188;9272061;9272454;9276337;9291674;9308335;9332253;9342280;9350344;9361307;9384966;9386075;9394888;9407988;9419513;9433114;943738…
210.78804734336;9213832;9201978;9188459;9176539;9190069;9169365;9162767;9173681;9175809;9186724;9178125;9164020;9152202;9149673;9152161;9159609;9152894;9146646;9157237;9155783;9166632;9190068;9213817;9232380;9255784;9288420;9295440;9321598;9340857;9340516;9349785;9370464;9378073;9378070;9383007;9397166;9414935;9439799;9448424;9456747;9468554;9492814;9493981;9502172;9515030;9526416;9539917;9544299…
210.874286083647;9312606;9302920;9288843;9276789;9289430;9270907;9261938;9272865;9275494;9286892;9277393;9261936;9253391;9249289;9252727;9259529;9253745;9246221;9258589;9255295;9265682;9291780;9314321;9332736;9357034;9389684;9396493;9422628;9443891;9442495;9451894;9473580;9480961;9481409;9483510;9501881;9519076;9545244;9552796;9561758;9573734;9596547;9598358;9606584;9619619;9632546;9645702;964923…
210.960514393189;9412073;9401303;9386237;9373878;9386647;9368318;9360314;9371689;9373321;9385021;9375798;9359829;9350339;9346988;9349444;9357716;9350193;9344432;9354824;9353155;9363414;9388911;9411538;9432165;9456798;9488131;9496509;9523636;9543767;9542751;9552359;9574038;9580904;9580558;9584779;9601519;9619335;9644262;9653581;9662211;9675762;9698193;9697961;9708849;9722056;9734726;9747622;975236…
211.046732300464;9502723;9491942;9476493;9464677;9479409;9458680;9450877;9461029;9463032;9475013;9466478;9451510;9440610;9437112;9438602;9447771;9441191;9434552;9445558;9443325;9453253;9480349;9503133;9521745;9547306;9580145;9587817;9615723;9636099;9634512;9643128;9665799;9673756;9673281;9678146;9696358;9713253;9738510;9748614;9756797;9770047;9793007;9793262;9802247;9816400;9829477;9842362;984729…
211.132939833948;9600433;9589200;9574233;9562838;9574844;9556619;9548664;9558291;9559154;9572279;9562987;9548508;9538168;9534662;9536738;9544682;9537787;9530945;9541365;9540422;9551310;9576209;9601029;9620301;9645491;9677847;9687922;9714793;9734325;9733969;9743399;9767121;9773191;9773271;9778193;9794287;9812569;9836825;9847503;9856586;9869600;9893455;9893676;9902563;9917324;9930759;9944314;994861…
211.21913702212;9701095;9689396;9674382;9660324;9673880;9655116;9644918;9655788;9659822;9671387;9662863;9646090;9637028;9633640;9634007;9642924;9635621;9627339;9641347;9639230;9649881;9675731;9699567;9720360;9745972;9778962;9788082;9814834;9835496;9835431;9842261;9866398;9873385;9875421;9879736;9896984;9914532;9940680;9949334;9958247;9972594;9996699;9996832;10005737;10021365;10033808;10047587;100…
211.305323893457;9799148;9785523;9771617;9758819;9771584;9750950;9743262;9753546;9755577;9767874;9758457;9744632;9733316;9728587;9731084;9739971;9731436;9725888;9737416;9736111;9747421;9772865;9796080;9817282;9842981;9875682;9885255;9911952;9932119;9933185;9942363;9967348;9973817;9972915;9977568;9996109;10014010;10038263;10050535;10058932;10072706;10097533;10097699;10106445;10121898;10135308;1014…
211.391500476436;9880470;9867748;9854255;9839288;9853162;9833788;9825639;9835915;9838228;9849645;9840453;9825744;9813451;9810495;9813021;9821423;9814644;9807706;9818445;9817823;9827229;9855052;9878683;9900635;9925465;9960783;9968901;9997278;10018399;10019107;10027385;10049760;10057674;10058274;10062336;10079898;10099779;10124616;10135232;10145925;10158803;10183973;10184199;10193582;10208900;10222…
211.477666799534;9982358;9970885;9955545;9941213;9953920;9934181;9925175;9938281;9939339;9950671;9941275;9926565;9914209;9911294;9913934;9923061;9917124;9908330;9920200;9919166;9929482;9955706;9981372;10002619;10028430;10062908;10071928;10100866;10121158;10122108;10130025;10154056;10161478;10162351;10167843;10185287;10203850;10229380;10240826;10250161;10264323;10288337;10289555;10301146;10314729;…
211.56382289123;10096912;10084042;10068374;10052551;10069496;10047404;10039725;10050508;10052421;10064305;10054494;10039480;10027897;10025311;10026746;10034994;10028333;10021122;10032539;10031346;10041263;10070689;10094091;10115609;10143729;10178301;10185863;10214664;10236036;10235622;10245374;10270178;10277315;10277374;10281069;10301217;10318967;10346494;10358452;10365713;10380668;10404392;10405…
211.64996878;10206611;10193221;10178025;10164435;10178713;10156755;10147492;10159292;10162708;10173588;10165135;10150222;10137522;10134224;10136676;10145897;10139519;10130174;10142695;10141582;10151342;10179484;10205509;10226722;10254815;10289328;10297455;10327337;10350116;10346716;10357988;10382128;10390464;10390193;10395852;10413769;10432623;10460175;10469916;10479955;10494033;10519520;10521310…
211.736104494322;10303327;10290120;10274683;10260245;10275282;10252477;10246262;10255923;10259605;10272381;10263676;10246012;10234338;10230523;10233217;10243042;10234413;10226597;10240362;10237093;10247691;10275585;10302556;10323681;10351301;10387529;10396541;10425489;10448504;10446373;10456860;10482308;10488683;10490203;10494362;10514408;10531731;10559890;10571113;10579966;10595596;10620350;1062…
211.822230062674;10394256;10380138;10363540;10349416;10364080;10342641;10334209;10346063;10347363;10360249;10352015;10334489;10321484;10319282;10320678;10330788;10322834;10314045;10327921;10326088;10335978;10366660;10391634;10412841;10441642;10476673;10485202;10516158;10537924;10538869;10548099;10573072;10581440;10581375;10585736;10605414;10624346;10652513;10663015;10671708;10686826;10713512;1071…
211.908345513532;10487372;10474726;10459590;10444091;10456640;10436623;10427488;10439821;10442261;10453949;10444728;10427393;10416108;10413413;10413835;10424124;10417048;10408761;10421518;10420889;10431022;10458922;10485017;10508251;10536410;10573399;10582875;10611529;10634794;10633485;10644624;10670548;10677495;10677535;10682883;10702218;10720457;10748559;10759617;10770255;10785088;10813239;1081…
211.994450875375;10591100;10577701;10563482;10547620;10563056;10539372;10530721;10542888;10545393;10557810;10548586;10531484;10518871;10515341;10516727;10528370;10519425;10512282;10525492;10523004;10533930;10562838;10589369;10612443;10641362;10677180;10685850;10718116;10740354;10738996;10750009;10776667;10783993;10784464;10788226;10807461;10828156;10855383;10866356;10876722;10892729;10919234;1091…
212.08054617668;10697539;10684290;10669164;10653419;10669418;10645246;10637117;10649836;10652162;10664622;10653664;10638059;10624903;10622095;10623068;10633084;10625637;10618173;10631602;10628376;10640419;10669336;10696628;10718454;10747664;10786113;10793352;10824633;10847055;10847632;10857747;10884034;10891191;10891178;10897007;10914879;10936850;10965162;10975430;10986944;11000993;11028134;11029…
212.166631445924;10793064;10780644;10763999;10748023;10763983;10741492;10732646;10743864;10746020;10759930;10748326;10732645;10719995;10715082;10718673;10728704;10720895;10712513;10724862;10723871;10735226;10763232;10791552;10815932;10843354;10881429;10890209;10921518;10946166;10944565;10954707;10981205;10990674;10990279;10994622;11013727;11035472;11062744;11075240;11086224;11100447;11127402;1112…
212.252706711584;10883998;10870376;10854531;10838199;10854242;10831034;10821190;10834273;10836507;10849851;10840307;10821159;10810128;10804652;10807023;10817306;10809363;10801484;10813966;10813832;10824683;10852845;10882396;10905253;10935247;10971988;10981949;11013914;11036115;11036534;11047233;11073939;11082629;11082803;11088075;11105874;11126571;11158690;11168755;11179230;11194433;11221511;1122…
212.338772002139;10973518;10961925;10943282;10927420;10943938;10921537;10911056;10923183;10927105;10939241;10930604;10911452;10898061;10895114;10897365;10905952;10899302;10891553;10904571;10902135;10916081;10943030;10971083;10995071;11025090;11063854;11074736;11103486;11127908;11129363;11138547;11164941;11174198;11174494;11179921;11199979;11219592;11251695;11261823;11272976;11287935;11315786;1131…
212.424827346065;11069183;11055157;11039434;11022043;11039076;11015828;11006599;11017101;11020216;11033967;11024471;11006363;10992808;10989335;10992256;11002230;10995153;10984447;11000171;10996226;11009277;11038349;11066761;11091344;11122907;11158813;11169242;11201185;11226405;11225897;11236820;11262901;11272772;11271947;11277366;11297105;11318329;11349372;11360660;11371065;11385548;11415182;1141…
212.51087277184;11155923;11143000;11125707;11111389;11127360;11101821;11091991;11105287;11108200;11121385;11110060;11091790;11079444;11076765;11077549;11087991;11081036;11070221;11085770;11084180;11095593;11127868;11155635;11180603;11207956;11249502;11258597;11291120;11315615;11316622;11324975;11353084;11361508;11362689;11366849;11387712;11408711;11438990;11450263;11462393;11477228;11505093;11507…
212.596908307941;11242665;11227228;11210406;11195833;11211657;11187004;11177536;11189480;11192146;11204775;11195613;11178100;11165293;11161135;11162418;11173175;11164935;11157802;11169643;11168078;11180486;11211354;11239962;11264423;11295101;11335189;11344229;11376454;11401992;11402606;11412329;11440767;11448709;11450153;11453720;11476564;11496036;11526709;11538876;11550213;11564857;11595444;1159…
212.682933982847;11319113;11303598;11286842;11270658;11288444;11263392;11253118;11265658;11267979;11283151;11270414;11253188;11241161;11235604;11237679;11249501;11240229;11231698;11245050;11244445;11255961;11288061;11317254;11340769;11372726;11411372;11421162;11455076;11480424;11479842;11490343;11519510;11527790;11527508;11532773;11554358;11575940;11606941;11618784;11629008;11644504;11674018;1167…
212.768949825033;11420684;11405585;11390416;11372376;11389099;11364629;11357035;11368469;11368820;11383838;11373230;11355850;11341543;11338140;11338543;11350512;11341355;11333935;11347346;11345940;11359390;11388708;11420350;11443925;11476946;11516720;11526677;11560260;11584061;11584912;11595970;11624062;11633316;11633608;11638179;11660071;11679979;11713310;11723796;11736542;11750916;11780416;1178…
212.854955862979;11516995;11501577;11486781;11468683;11486323;11460961;11452313;11466481;11467596;11480597;11469795;11453286;11437601;11433940;11435873;11446647;11437493;11430138;11443417;11442500;11455732;11487777;11519507;11540980;11575361;11615784;11624859;11658082;11683002;11683165;11694267;11724952;11731964;11734183;11739871;11759059;11780928;11813246;11824412;11836210;11851625;11881882;1188…
212.94095212516;11601803;11586427;11571300;11554057;11572772;11546504;11538621;11552696;11552439;11565283;11555828;11537376;11523300;11520131;11521816;11531434;11523752;11517078;11529359;11525853;11542165;11573618;11605024;11627867;11662552;11702753;11713932;11746870;11771593;11773440;11782512;11811963;11820430;11822940;11828837;11848949;11869212;11903358;11914083;11924096;11940073;11971319;11972…
213.026938640055;11694920;11679127;11663961;11646663;11663898;11636506;11631874;11644871;11644360;11657299;11646364;11629433;11614170;11610779;11610766;11623257;11616355;11608045;11621807;11622262;11633502;11664595;11698902;11722781;11755636;11796452;11807914;11840316;11865333;11866927;11877867;11907698;11916696;11917368;11923199;11943428;11964387;11997454;12009632;12020288;12035823;12067635;1206…
213.112915436141;11786257;11771063;11755686;11738631;11755097;11730010;11722229;11736244;11736363;11747625;11737822;11721312;11706049;11701252;11703326;11715780;11706756;11698101;11712852;11711052;11726033;11757201;11788588;11815205;11847115;11888483;11899365;11932948;11959818;11959947;11971712;12000253;12010648;12010877;12016571;12038043;12058168;12092077;12103737;12115027;12131499;12163150;1216…
213.198882541896;11875234;11859364;11842184;11825599;11842233;11815498;11810145;11823975;11823023;11836471;11825541;11806002;11792548;11787700;11790117;11802524;11792845;11786393;11798144;11798665;11812184;11844312;11878122;11901156;11936009;11976847;11989442;12022439;12048632;12050450;12060552;12087752;12098486;12101809;12107470;12126373;12148001;12180704;12193501;12203995;12220603;12253033;1225…
213.284839985796;11957021;11942176;11925306;11906561;11925606;11896283;11890172;11905040;11906281;11917811;11907055;11889432;11874411;11869724;11871318;11884159;11875522;11866204;11879634;11880129;11895229;11926909;11962679;11985035;12016337;12060729;12071439;12105389;12131283;12133474;12143911;12173130;12183111;12185362;12190983;12210969;12233211;12266892;12279083;12288932;12306764;12338535;1233…
213.37078779632;12036161;12020955;12004101;11985662;12004739;11976078;11970895;11983629;11984427;11996999;11986515;11966860;11952148;11949173;11949587;11961478;11953248;11946011;11960548;11958738;11972776;12005323;12039427;12065080;12097266;12141136;12152948;12184187;12212792;12214963;12225589;12254989;12265555;12266791;12271815;12292012;12314829;12348055;12361488;12372818;12390642;12421363;12423…
213.456726001945;12112006;12095786;12078726;12060929;12079056;12049941;12045969;12058330;12059686;12072193;12059285;12042604;12026570;12024989;12023588;12038042;12028424;12020760;12034938;12032981;12047095;12080426;12115123;12140522;12175005;12216298;12227837;12261957;12289483;12291069;12303005;12332141;12342238;12344157;12351516;12369610;12392350;12426793;12439223;12451727;12467572;12500128;1250…
213.542654631148;12192109;12175447;12159820;12141009;12159133;12132379;12126007;12139743;12139722;12152703;12140861;12122498;12107881;12103685;12104711;12117603;12109355;12100702;12115006;12113325;12127957;12160584;12197974;12221984;12255319;12298787;12312181;12345310;12371708;12372735;12386847;12415797;12424703;12426918;12431757;12452576;12475223;12511248;12523067;12534515;12550967;12583928;1258…
213.628573712406;12257640;12243478;12225341;12206985;12224980;12198623;12191278;12205892;12206998;12218942;12207481;12189581;12173657;12170180;12171153;12182238;12173601;12167487;12181376;12179828;12193777;12226922;12263794;12288384;12322425;12365754;12378282;12411865;12439511;12440137;12453566;12482691;12491022;12495268;12501486;12522458;12545093;12578091;12590744;12603914;12621363;12652896;1265…
213.714483274198;12339280;12323377;12307981;12287488;12308006;12279642;12271758;12285961;12287464;12299444;12289900;12269416;12254286;12249597;12252478;12263459;12255530;12246534;12261701;12258834;12274301;12308470;12343580;12370438;12404727;12448996;12459411;12495124;12522822;12522151;12535170;12565872;12576749;12577748;12583082;12605801;12627696;12663577;12674000;12687592;12702844;12739247;1273…
213.800383345;12442984;12426744;12407977;12390990;12407745;12382453;12373176;12388070;12388493;12400573;12391250;12371504;12356886;12350638;12353235;12366214;12355808;12347589;12362905;12360642;12374138;12409617;12443683;12469014;12503869;12549582;12561017;12595839;12624791;12625650;12638256;12668699;12679268;12680490;12687354;12708634;12731368;12765383;12778738;12790550;12808124;12841451;1284276…
213.88627395329;12537455;12521911;12503970;12485283;12505262;12476563;12466558;12481629;12482751;12496085;12484265;12465873;12450839;12446380;12446955;12459978;12451292;12442150;12457995;12455012;12469166;12504286;12539714;12564921;12599942;12644737;12656331;12692784;12720054;12721422;12733209;12764031;12774941;12775865;12782686;12803746;12827691;12864140;12875055;12887124;12904038;12938419;12938…
213.972155127546;12625779;12608386;12589499;12572363;12590187;12563221;12554226;12568697;12569564;12583598;12571166;12552380;12535724;12530522;12534129;12546647;12536750;12528162;12542563;12540318;12553802;12590969;12623096;12650207;12687302;12730650;12743977;12779502;12806210;12806066;12819964;12850693;12861578;12864220;12868016;12892217;12914726;12950930;12962570;12976214;12994885;13026559;1302…
214.058026896244;12704966;12688086;12668104;12650561;12670119;12640854;12631780;12645757;12648681;12663405;12650278;12629821;12616359;12610277;12611719;12622909;12614487;12605317;12620738;12618314;12632281;12667901;12702607;12730359;12766271;12810402;12822821;12858553;12886045;12888468;12901160;12930939;12941537;12942946;12946951;12971050;12995004;13030229;13044420;13056730;13076012;13107717;1310…
214.143889287863;12778776;12764075;12743452;12725088;12745075;12714519;12705273;12720456;12722009;12737184;12724910;12705388;12689231;12684137;12686518;12698213;12688956;12680669;12696735;12692365;12707637;12742527;12775304;12804633;12840220;12886150;12897377;12933248;12965302;12963863;12975097;13006832;13018970;13019873;13025576;13049018;13072892;13107427;13119568;13135793;13153731;13185215;1318…
214.22974233088;12837306;12821237;12800181;12782912;12802084;12774169;12761154;12777639;12778699;12794289;12783847;12762093;12745702;12740607;12744298;12754716;12743867;12735936;12750721;12749197;12765404;12801306;12834681;12862795;12898213;12943386;12955246;12992407;13020558;13021997;13034427;13065101;13075980;13077119;13083156;13107860;13131957;13166404;13179925;13192709;13213122;13246899;13246…
214.315586053772;12910739;12895727;12875903;12856190;12875077;12846240;12835019;12849874;12851960;12867824;12856424;12835032;12819679;12811992;12816953;12828315;12816815;12807697;12824339;12821874;12836844;12874389;12907698;12936272;12970910;13017236;13029253;13065284;13095351;13097122;13107567;13139741;13149849;13151451;13157428;13180975;13205462;13243025;13253919;13269383;13287353;13320472;1332…
214.401420485016;12975523;12958360;12938955;12918880;12939080;12910340;12898925;12914562;12918335;12932254;12921366;12898050;12883562;12876398;12881243;12892272;12882430;12872268;12889073;12884037;12900565;12938695;12969761;12999183;13034861;13081639;13092811;13131443;13160733;13161729;13171515;13206614;13215206;13215637;13222007;13245793;13270765;13306418;13319959;13333413;13352396;13385462;1338…
214.487245653091;13032841;13017083;12998160;12977341;12996408;12968059;12955582;12970345;12974065;12989635;12978854;12956272;12939056;12935242;12937175;12949314;12937691;12929377;12947401;12943691;12956716;12995951;13026690;13056572;13093524;13139358;13150937;13189502;13217830;13219322;13231042;13263819;13274113;13275051;13281429;13306020;13331241;13368452;13380532;13394795;13411812;13446738;1344…
214.573061586473;13102704;13085679;13062947;13046113;13065042;13037925;13024979;13039861;13042069;13058016;13044234;13023849;13007942;13002592;13005885;13017173;13008338;12996238;13012305;13011049;13024911;13063145;13096574;13124870;13161951;13209515;13220475;13259914;13289424;13288963;13302831;13333205;13345527;13346315;13352425;13375409;13400493;13438919;13451565;13465333;13483827;13516790;1351…
214.65886831364;13157888;13143253;13122836;13100880;13121705;13094075;13079580;13095326;13099530;13113998;13101589;13079397;13065355;13057926;13060551;13072795;13061792;13053557;13069886;13067474;13081964;13119043;13152840;13181926;13218273;13265619;13277665;13316292;13347161;13345140;13359179;13392608;13403402;13402857;13410279;13433893;13459153;13495099;13508807;13523312;13542307;13576160;13577…
214.744665863069;13216967;13202468;13180645;13160937;13180819;13151588;13138957;13154939;13157422;13172368;13161299;13138614;13122121;13114980;13119858;13132008;13120913;13111033;13127480;13124655;13140033;13177222;13210935;13240670;13278136;13325307;13336917;13375855;13404845;13405197;13419825;13450079;13462258;13463252;13469512;13494346;13518547;13555351;13570161;13585411;13600501;13637214;1363…
214.830454263239;13270913;13255688;13232732;13212674;13235045;13203077;13188629;13207294;13210703;13226038;13213109;13190185;13174560;13168562;13171268;13183374;13173215;13163145;13179785;13175768;13191351;13229462;13263887;13293831;13329179;13377135;13388610;13428849;13459172;13459421;13471823;13504987;13514509;13516701;13522125;13548823;13574016;13608700;13623337;13637781;13656469;13692466;1369…
214.916233542625;13336010;13320127;13297505;13276617;13296671;13268078;13254764;13271504;13274483;13290012;13279440;13255799;13240810;13232906;13235144;13247694;13237410;13227195;13245355;13242131;13256799;13294504;13328942;13359058;13395787;13443853;13454181;13494849;13525062;13525189;13538280;13569071;13580809;13581616;13588859;13613664;13640190;13677252;13690107;13703477;13722694;13758632;1375…
215.002003729707;13372042;13353692;13332691;13314055;13333441;13305495;13290845;13305327;13309704;13324386;13314505;13290885;13274633;13269335;13270969;13285408;13271923;13262087;13279308;13276318;13292951;13330554;13363684;13393217;13432089;13479051;13491057;13530964;13560736;13560734;13573583;13607280;13617383;13619421;13625948;13651126;13678364;13714101;13728010;13742760;13760680;13795841;1379…
215.08776485296;13410720;13393123;13372096;13354845;13372498;13342669;13329377;13344593;13347993;13364699;13352588;13328670;13311957;13306762;13310103;13323056;13311732;13300313;13317025;13316309;13329870;13368496;13401211;13432211;13471608;13517044;13530338;13569641;13599521;13599628;13613199;13647645;13656859;13659763;13663419;13690859;13716737;13754524;13768649;13782761;13802536;13837895;13838…
215.173516940863;13457213;13440473;13420333;13396652;13420099;13389693;13375885;13392085;13395402;13410444;13397789;13375523;13360378;13353505;13356569;13368874;13358172;13347517;13365303;13361790;13376616;13415345;13447319;13479587;13518967;13566252;13576668;13617426;13648860;13647552;13662299;13695627;13707026;13707300;13712953;13739429;13765151;13801622;13816645;13830593;13849998;13886970;1388…
215.259260021893;13511743;13495266;13474615;13452364;13473604;13442116;13429885;13447645;13448335;13465448;13453443;13428938;13414854;13407636;13411180;13422665;13411081;13401058;13419193;13416194;13431345;13470028;13503224;13533706;13571545;13620793;13632102;13674853;13703007;13702679;13717105;13750735;13760788;13762642;13768765;13795077;13821444;13856967;13872668;13887621;13905558;13941455;1394…
215.344994124528;13552197;13533830;13511765;13490843;13510822;13482380;13469185;13486519;13487452;13503661;13491919;13466188;13452321;13445901;13446445;13459751;13451062;13439250;13457636;13454813;13469676;13508286;13542147;13573551;13611416;13657697;13671626;13713623;13741593;13741045;13755765;13790592;13800855;13800878;13808932;13834345;13859872;13898279;13911543;13927436;13945211;13980770;1398…
215.430719277244;13579766;13559481;13540198;13518578;13538152;13509747;13496023;13511171;13513870;13528306;13518449;13494143;13476533;13470810;13474170;13486348;13475316;13465763;13482149;13480975;13494639;13533698;13568171;13598285;13638029;13686216;13698732;13739588;13770190;13767797;13783000;13818726;13827190;13828762;13836453;13862620;13886054;13926264;13937850;13954283;13973473;14010539;1401…
215.51643550852;13618954;13599811;13578885;13557195;13578119;13548673;13533921;13551628;13553274;13568902;13556742;13534633;13518039;13511529;13516043;13526947;13513950;13505553;13523138;13520231;13534833;13574564;13608341;13637501;13677434;13728072;13739634;13779740;13810637;13808371;13823511;13858508;13868846;13870448;13877112;13902708;13927292;13966324;13978936;13994652;14015150;14050436;14051…
215.602142846833;13667143;13648630;13626583;13605773;13625812;13595985;13583714;13600575;13602835;13617735;13604049;13582547;13565245;13559046;13562915;13574939;13563096;13553099;13570361;13568022;13582487;13621646;13656811;13687302;13725343;13774796;13787587;13828370;13860740;13856831;13873263;13906541;13917885;13918896;13925897;13952958;13976779;14017531;14030229;14043952;14066657;14099959;1410…
215.68784132066;13691033;13671481;13651591;13630375;13649771;13620177;13607607;13625490;13627754;13640671;13629397;13606006;13588642;13582609;13585138;13598095;13586672;13577283;13593611;13592164;13606857;13645915;13679593;13712168;13750186;13800323;13811301;13852544;13882157;13881780;13896843;13931806;13942769;13942510;13950921;13977104;14003634;14041593;14053271;14067358;14089190;14123228;14126…
215.773530958478;13710875;13692825;13670556;13648952;13671302;13640520;13626181;13642363;13646770;13662871;13650565;13625870;13608081;13603077;13605264;13618696;13606284;13597829;13613562;13612202;13627118;13666619;13699045;13730553;13769522;13819375;13831995;13873148;13906066;13901737;13918934;13951973;13963133;13965013;13971215;13996530;14023014;14062113;14075636;14090121;14111296;14146355;1414…
215.859211788766;13744783;13727595;13707595;13685724;13706540;13674457;13662439;13679126;13681217;13697536;13685331;13659899;13643731;13637249;13640924;13654634;13641966;13630821;13648609;13645685;13662216;13698784;13734434;13766454;13806116;13855303;13868380;13908716;13941325;13937382;13953559;13986945;13999108;13999266;14007215;14034507;14059876;14098671;14111837;14127458;14147711;14182136;1418…
215.94488384;13768961;13750984;13730619;13708348;13728206;13698079;13684636;13701159;13704097;13719315;13706799;13682608;13666433;13658925;13661859;13674649;13663980;13653501;13671143;13669935;13684356;13725088;13756929;13789833;13827522;13878975;13889754;13931143;13962943;13960156;13976230;14012135;14022759;14023083;14029771;14055820;14081848;14121438;14134448;14150653;14169881;14205541;14207380…
216.030547140658;13791213;13773168;13753302;13729923;13750506;13719970;13707492;13723947;13727905;13744146;13729591;13706917;13688823;13682837;13687033;13697232;13687745;13677221;13693205;13690671;13706049;13747091;13781320;13813549;13851963;13900701;13912940;13955352;13987497;13984769;13999405;14035526;14044915;14044849;14051914;14080715;14107388;14144353;14157465;14172828;14193187;14230514;1423…
216.116201719218;13803977;13786015;13766965;13744275;13764926;13732946;13720661;13736469;13740220;13755552;13742469;13718348;13702253;13695854;13698461;13711418;13697912;13689194;13707128;13705912;13719665;13758368;13794443;13824467;13863623;13915001;13925711;13967187;13999015;13997255;14012499;14048233;14058523;14058504;14067033;14093930;14118416;14157630;14171857;14185797;14206682;14242538;1424…
216.201847604156;13826599;13809387;13787176;13766207;13786624;13756590;13741301;13758662;13761711;13775596;13765262;13741047;13724226;13717333;13720054;13732419;13721821;13710322;13728850;13727243;13739769;13780278;13815325;13846760;13885566;13935676;13949188;13989638;14021035;14022453;14035595;14070573;14080740;14082035;14086438;14115720;14141871;14180693;14194206;14209696;14230535;14264408;1426…
216.287484823951;13846799;13827702;13807006;13785607;13805403;13774600;13762058;13777677;13780431;13796468;13784428;13759799;13743402;13734911;13739387;13750681;13741095;13730105;13748648;13746098;13759285;13799317;13836195;13867094;13904169;13954148;13969396;14009857;14041620;14039600;14054373;14090600;14100234;14102625;14107773;14135952;14161506;14199734;14214392;14228701;14248917;14286897;1428…
216.37311340708;13866556;13849735;13827135;13806199;13827609;13795490;13781475;13797993;13801979;13817653;13806256;13781699;13762990;13756674;13760868;13771058;13761016;13750887;13769191;13766160;13780835;13820078;13855743;13888490;13925575;13976446;13987840;14031317;14062257;14059993;14075758;14111523;14120682;14123780;14131507;14156681;14182991;14221079;14234671;14249511;14270630;14306408;14306…
216.45873338202;13877595;13859428;13840078;13816520;13838726;13807786;13794049;13809432;13812989;13829623;13816903;13791458;13773580;13768419;13769682;13783463;13772522;13762832;13778894;13778537;13793677;13833630;13868346;13898211;13936360;13987634;14000345;14042935;14071861;14071045;14087730;14122880;14132193;14135148;14140935;14168601;14193489;14233726;14246403;14261600;14283228;14319049;14320…
216.544344777248;13896729;13878470;13856813;13833953;13856149;13824245;13809926;13826417;13830868;13845635;13833101;13811173;13792441;13785612;13790179;13803059;13788952;13779638;13797454;13794284;13809254;13848798;13886817;13915471;13955063;14005242;14019471;14059534;14091021;14089969;14105754;14139899;14150058;14152425;14157733;14185949;14212800;14250476;14263581;14280811;14300467;14335461;1433…
216.629947621243;13895610;13876890;13855427;13833412;13856703;13824786;13809569;13827185;13828658;13843962;13833383;13808214;13791315;13782753;13787246;13800705;13787151;13777277;13794691;13793192;13808611;13847835;13882781;13913303;13954022;14004656;14015398;14058357;14089814;14087251;14104862;14137968;14149012;14149194;14159123;14185345;14210698;14249605;14262787;14277509;14297618;14334844;1433…
216.715541942481;13880293;13861010;13841131;13818491;13841565;13809140;13796210;13813019;13815513;13830224;13818248;13793354;13775831;13770868;13772477;13784343;13773461;13761251;13780822;13778036;13794067;13834080;13869362;13900263;13939262;13991248;14002484;14043044;14075538;14073803;14088851;14123066;14134361;14137273;14143687;14169807;14196702;14235227;14247516;14265021;14283401;14320778;1432…
216.80112776944;13864971;13846035;13825070;13802982;13826716;13795830;13778896;13795823;13801907;13815740;13802642;13778447;13762119;13754716;13758589;13769726;13757749;13747642;13764581;13762037;13776914;13818306;13854345;13886388;13922748;13975721;13986915;14028609;14060278;14060018;14072013;14111029;14120606;14121077;14129116;14154968;14181569;14221677;14234845;14248589;14269795;14307211;14306…
216.886705130597;13870974;13852925;13831714;13810317;13829965;13801143;13787122;13802699;13807237;13820833;13808265;13783746;13767083;13759489;13763688;13775821;13764280;13754371;13771304;13770444;13783308;13822641;13857923;13890601;13928693;13980760;13993472;14033503;14066753;14064095;14080357;14115847;14126752;14128248;14134554;14160494;14187017;14226554;14239327;14255239;14275328;14310584;1431…
216.972274054431;13862306;13845522;13823774;13799977;13820817;13791316;13776873;13794332;13796599;13811766;13800215;13776097;13758352;13751559;13754221;13767403;13756097;13745599;13763663;13761645;13775076;13815862;13850223;13883438;13921318;13972801;13985661;14025699;14057529;14056126;14072101;14106655;14118152;14120510;14126231;14153520;14179108;14217695;14231525;14248389;14265252;14303894;1430…
217.057834569417;13845030;13827033;13806580;13783552;13806243;13774498;13760878;13778169;13780347;13795214;13782316;13757708;13742696;13734197;13737255;13750167;13737907;13730105;13746251;13743984;13758409;13798261;13834646;13865644;13905274;13955177;13968815;14009005;14041031;14040183;14055221;14089489;14100045;14103599;14109927;14134500;14161261;14200281;14213676;14228931;14250879;14285359;1428…
217.143386704035;13848302;13828097;13808270;13785621;13809032;13777507;13762203;13779206;13782080;13798321;13783606;13761167;13744569;13736271;13739503;13752267;13741940;13731901;13748061;13745524;13760964;13800545;13837140;13869431;13907516;13956163;13969582;14010653;14042634;14042375;14057681;14092153;14102893;14103333;14111393;14137141;14164509;14202225;14216173;14231064;14252535;14287212;1429…
217.22893048676;13846915;13830312;13808510;13784912;13809168;13776848;13763839;13778806;13783541;13798555;13785107;13761065;13743395;13737877;13738902;13752226;13742088;13729921;13748764;13746983;13761621;13802659;13836917;13866125;13907571;13955490;13969032;14009677;14041948;14039979;14056016;14090045;14101960;14103875;14110789;14137348;14163865;14203107;14215441;14230024;14253094;14287626;14288…
217.314465946071;13841992;13823647;13803803;13779975;13801427;13771189;13757318;13775828;13777809;13791603;13779576;13754403;13738181;13731890;13733297;13746810;13734539;13724704;13742529;13740018;13755602;13794803;13831311;13861529;13900813;13950337;13964715;14004024;14036295;14036317;14050722;14086572;14096534;14098818;14105420;14131334;14158049;14196679;14209765;14226040;14246180;14282020;1428…
217.399993110445;13823454;13805333;13784553;13761855;13782811;13751876;13738809;13755708;13759121;13773192;13761239;13736963;13719155;13711084;13714757;13728333;13717218;13705642;13723891;13722141;13736071;13776150;13810484;13843590;13881072;13932156;13944641;13984361;14015804;14015501;14031729;14066079;14078558;14077577;14086015;14112028;14137769;14176766;14188325;14204159;14225084;14261189;1426…
217.48551200836;13786769;13768713;13749621;13725463;13747295;13715973;13704647;13720013;13721917;13736903;13724359;13700427;13683842;13676132;13680795;13691428;13680751;13670421;13688125;13686706;13701510;13740413;13776670;13807520;13846521;13894998;13910220;13949428;13980537;13980324;13996396;14030535;14040345;14043884;14049492;14077370;14101821;14140523;14154267;14170592;14189732;14223828;14228…
217.571022668292;13774949;13758218;13737071;13714779;13736428;13706604;13690138;13709261;13709634;13725988;13714520;13687161;13671942;13664159;13667395;13680830;13667934;13658024;13675690;13672871;13689680;13728225;13764969;13795836;13834532;13883761;13897204;13938428;13970246;13968829;13984399;14019241;14029008;14032404;14039042;14065869;14090304;14130106;14141962;14157282;14178080;14215858;1421…
217.65652511872;13758000;13739674;13719062;13694658;13716375;13686130;13673390;13689721;13692917;13705790;13693576;13669334;13652327;13646233;13648598;13661193;13649872;13637187;13656782;13655493;13668711;13709494;13746671;13776051;13815265;13865229;13878487;13918611;13949747;13949917;13965103;13997435;14009550;14011413;14020029;14046121;14071349;14109037;14123737;14140521;14158521;14196344;14196…
217.742019388121;13738918;13721581;13699145;13676307;13698581;13668690;13655190;13671084;13674058;13689638;13676922;13651340;13635027;13627758;13630645;13642216;13631652;13621379;13639259;13636355;13651507;13691659;13727833;13758214;13798284;13847120;13859120;13901426;13930889;13930984;13946329;13981542;13990204;13994219;14001601;14027253;14052228;14092064;14104258;14118829;14139917;14176293;1417…
217.827505504971;13736572;13720857;13700197;13676994;13698038;13666863;13653769;13670993;13673768;13687242;13674733;13653224;13633759;13626845;13628602;13642401;13633460;13619689;13637542;13635441;13650063;13690782;13724717;13757653;13796005;13845080;13858138;13899854;13931175;13928728;13944206;13979220;13989778;13992311;13998099;14025164;14051205;14089621;14102378;14117185;14138493;14173553;1417…
217.91298349775;13714458;13697177;13674946;13654401;13674429;13645000;13632638;13647555;13649119;13663215;13651747;13626694;13612006;13602750;13607746;13618534;13607267;13597491;13614649;13612580;13628007;13667740;13702614;13732817;13771379;13820726;13834047;13876575;13905135;13906441;13919752;13956664;13966839;13967277;13973586;13999422;14026017;14065891;14076332;14093303;14113748;14149782;14150…
217.998453394934;13685601;13668719;13647600;13626081;13647061;13616173;13601843;13618860;13621592;13634807;13622724;13600228;13582252;13574318;13580276;13590538;13577773;13567603;13586576;13583151;13598811;13639262;13672221;13704075;13742041;13791026;13805455;13846057;13878086;13875660;13891512;13926418;13937727;13938924;13946298;13970650;13998616;14035355;14048967;14064357;14083433;14118453;1412…
218.083915225;13657097;13638674;13618718;13596023;13616691;13585681;13573325;13589683;13591821;13605553;13594619;13570361;13554312;13546401;13547696;13559518;13549003;13537061;13556460;13554166;13567470;13608630;13643425;13675606;13711968;13762430;13775814;13815907;13847413;13843707;13860266;13895196;13906383;13907400;13914514;13941765;13966850;14003251;14016014;14032249;14052131;14087878;1409024…
218.169369016426;13623068;13606726;13585270;13562663;13584392;13553608;13540367;13556468;13560533;13574612;13561110;13537881;13520416;13511232;13514988;13527817;13516220;13504379;13523343;13519168;13536088;13574672;13610503;13639789;13679191;13728208;13741705;13781413;13812652;13811397;13827075;13858771;13870378;13873518;13879752;13906631;13932661;13970022;13984041;13997330;14018260;14052645;1405…
218.25481479769;13602019;13583153;13563348;13540693;13561918;13533106;13517664;13534989;13537717;13550309;13539773;13516731;13499958;13490848;13493383;13507069;13494660;13482893;13502592;13500526;13512830;13553128;13586672;13616742;13656403;13705329;13718818;13758697;13790295;13789093;13804795;13838579;13848188;13851518;13858430;13884306;13910593;13946799;13959659;13976609;13994988;14029310;14033…
218.340252597268;13575911;13557527;13537788;13514504;13536093;13504806;13492295;13508203;13511999;13525656;13513382;13489157;13472820;13464493;13468095;13479817;13469357;13458211;13475189;13473317;13488349;13526794;13560413;13591385;13632108;13679377;13693188;13732891;13764797;13761916;13779873;13811933;13823381;13825322;13832539;13857394;13883902;13921149;13932704;13950827;13971443;14005473;1400…
218.425682443639;13530955;13513363;13492214;13468667;13490889;13460860;13446753;13462966;13467202;13480319;13466475;13443235;13425762;13418857;13422984;13433283;13422289;13412537;13429623;13427483;13441942;13480963;13515517;13545930;13584513;13633568;13645846;13687935;13717989;13715540;13733498;13766326;13776798;13778502;13785561;13810626;13836288;13874663;13887442;13904312;13924418;13957803;1395…
218.51110436528;13512785;13496580;13473923;13450368;13472833;13442760;13428646;13446170;13449691;13462940;13451038;13426655;13409378;13401605;13405188;13416150;13404931;13394035;13412386;13410685;13423477;13463495;13497515;13528385;13566785;13614690;13628510;13669374;13700778;13697138;13714954;13747682;13759189;13760278;13766121;13793176;13819849;13855536;13867781;13885399;13904937;13939056;13941…
218.596518390668;13495275;13477793;13456928;13434918;13456007;13426094;13410868;13427886;13431019;13445496;13435391;13408434;13395042;13385671;13387982;13399971;13388543;13377126;13395919;13392145;13406510;13447100;13478908;13512356;13550213;13599132;13610710;13650946;13682053;13679437;13694066;13728829;13738889;13742104;13749625;13775852;13802580;13837971;13850318;13864137;13886705;13920530;1392…
218.68192454828;13450012;13432234;13412165;13387852;13408701;13379310;13366189;13382746;13386034;13399502;13387747;13363056;13345446;13337408;13342157;13354103;13342084;13330940;13349596;13345838;13361016;13399749;13434324;13464559;13502377;13549913;13563369;13602807;13634807;13630842;13649118;13682368;13691909;13693381;13702309;13726487;13754123;13789079;13801332;13818388;13838315;13873115;13874…
218.767322866595;13411831;13393618;13371854;13350893;13370563;13343268;13328035;13343945;13348572;13361356;13349869;13324468;13308848;13301746;13302623;13315858;13304249;13293010;13311296;13309434;13323483;13361954;13394763;13426486;13463682;13513232;13525928;13567116;13595311;13593896;13609009;13643551;13653294;13655326;13663410;13689513;13715474;13750881;13765185;13780826;13800220;13835911;1383…
218.852713374089;13387453;13369958;13347414;13328686;13349373;13318411;13303820;13320620;13323535;13338687;13325361;13302609;13285790;13278754;13281358;13293213;13281337;13269834;13289178;13285339;13298630;13339526;13371522;13401203;13439865;13488693;13501103;13540945;13571591;13571030;13586028;13619193;13629628;13632012;13637697;13664941;13691554;13726435;13738893;13755468;13775872;13809255;1381…
218.93809609924;13344626;13328086;13306003;13284612;13306111;13275060;13262008;13277723;13281150;13293672;13282901;13259554;13242492;13235768;13237641;13249788;13236171;13226127;13244677;13242481;13255221;13296664;13329063;13359951;13397514;13443509;13458807;13498548;13528254;13527381;13541616;13575909;13586726;13587510;13593597;13621399;13646846;13682207;13694223;13710308;13731132;13765782;13765…
219.023471070525;13306732;13289650;13267890;13247304;13267921;13237886;13224362;13239202;13242927;13256894;13243858;13220661;13206016;13195931;13198720;13210635;13200424;13188624;13205829;13204246;13217407;13257185;13290789;13320296;13357683;13407034;13420689;13457923;13488946;13488960;13504744;13538052;13547924;13549211;13556082;13582843;13609173;13644526;13656686;13672223;13691881;13725805;1372…
219.108838316423;13275292;13257290;13235637;13213072;13234665;13205759;13191383;13207211;13210356;13223739;13212219;13189731;13171534;13163948;13167336;13180162;13166265;13154899;13173700;13171294;13184485;13225883;13257720;13287212;13325718;13372270;13385177;13426801;13455589;13454382;13468626;13501596;13514351;13514804;13521902;13547488;13573195;13610164;13621468;13638105;13658184;13692656;1369…
219.194197865409;13233044;13214553;13194576;13172158;13193303;13165382;13148924;13167167;13168116;13181494;13170991;13149175;13130501;13123537;13127302;13137094;13126635;13114358;13132341;13131065;13144522;13185247;13216477;13247102;13285009;13331208;13344217;13383698;13415132;13412577;13428734;13461260;13471388;13472017;13478594;13506377;13531957;13567368;13577561;13595582;13614828;13649765;1365…
219.279549745963;13192021;13177890;13155517;13133873;13155078;13125940;13113622;13127737;13133435;13143961;13133384;13108395;13092947;13085897;13086853;13099707;13088333;13076661;13095894;13092549;13107517;13144360;13178324;13207338;13246517;13292945;13304689;13344447;13375057;13374197;13389413;13422740;13431988;13433924;13441945;13466943;13493261;13527570;13539903;13557176;13575807;13608756;1361…
219.36489398656;13178574;13160707;13140538;13119031;13138775;13111469;13095932;13112024;13115926;13127944;13116266;13092862;13076699;13067593;13070728;13084117;13072639;13061978;13078716;13077257;13090924;13129426;13161935;13192585;13228817;13277740;13290319;13329720;13358415;13356931;13371316;13406310;13415389;13418343;13424574;13451621;13475040;13512366;13522276;13538878;13559175;13592343;13596…
219.450230615679;13143235;13127162;13105336;13083827;13104681;13075347;13061378;13077383;13081253;13094580;13082383;13060160;13042569;13034854;13038187;13048659;13037228;13026587;13043111;13041143;13056848;13094372;13128389;13157486;13195158;13241325;13252528;13294203;13322914;13321971;13336699;13371153;13380417;13383374;13388747;13414602;13439036;13474868;13487400;13504010;13520900;13557454;1355…
219.535559661797;13102709;13086599;13064440;13043715;13065315;13034379;13022647;13037220;13041570;13055095;13041720;13018775;13002488;12994353;12997137;13009694;12997216;12987937;13003288;13001279;13015733;13053085;13085773;13115474;13154897;13201495;13213542;13252931;13281555;13279977;13295110;13330688;13340343;13340142;13347381;13373363;13400124;13434689;13445877;13461396;13479785;13513251;1351…
219.620881153392;13081176;13064107;13043110;13022926;13044177;13015129;12999345;13016279;13019717;13033388;13023045;12997918;12981006;12972028;12977461;12988157;12976252;12965505;12982384;12981016;12993919;13034274;13065789;13095981;13133337;13178431;13191728;13230805;13260292;13260378;13276404;13307546;13317605;13320164;13325316;13353891;13377046;13412637;13424220;13441567;13460288;13493165;1349…
219.70619511894;13059869;13041579;13021840;13000845;13023002;12992543;12978269;12994356;12997596;13010156;12999630;12975146;12960393;12951068;12954775;12964857;12953562;12943815;12960435;12959438;12971319;13011014;13042244;13073028;13109395;13156693;13169391;13209629;13238713;13236142;13253061;13282392;13295490;13296153;13301870;13328994;13355680;13390116;13400988;13416339;13437255;13471090;13473…
219.79150158692;13024166;13009190;12986743;12966109;12986522;12957860;12943234;12958191;12963170;12975082;12965110;12940918;12924584;12917365;12919572;12929520;12919896;12907897;12924966;12924116;12937399;12975823;13008133;13037023;13075218;13121058;13135755;13173512;13203904;13201872;13218234;13250090;13259476;13259873;13267779;13293622;13319372;13354643;13366752;13381352;13399175;13434777;13436…
219.876800585809;12989180;12973151;12953915;12931388;12952718;12920275;12906638;12924566;12927917;12939685;12927711;12905369;12889334;12880009;12884975;12895480;12884788;12874584;12891070;12890349;12903040;12940518;12971554;13001727;13040246;13085576;13098952;13136638;13168471;13166632;13180091;13214339;13224322;13226395;13232950;13258268;13283611;13317625;13329835;13347941;13365783;13399042;1340…
219.962092144083;12961825;12945431;12925694;12903903;12923816;12894945;12880155;12896035;12900659;12912730;12900389;12877125;12861027;12854010;12857745;12868071;12856425;12844453;12862850;12860265;12873185;12913097;12944744;12972472;13011170;13057183;13070098;13109043;13137853;13136020;13153045;13185539;13194593;13195915;13205005;13229384;13254727;13289934;13301087;13317641;13336972;13370211;1337…
220.047376290222;12951739;12934532;12914445;12893688;12913615;12885049;12872011;12886684;12889418;12901690;12892006;12867378;12853451;12843542;12846765;12857397;12845933;12835119;12853272;12850197;12864004;12902341;12935500;12964319;13001395;13048029;13059907;13098529;13128825;13126642;13143565;13176511;13184670;13185432;13193974;13217961;13243316;13278252;13291138;13305927;13326070;13358876;1336…
220.132653052702;12941804;12927363;12905337;12884955;12904416;12875021;12860963;12877782;12881264;12893439;12882616;12858404;12842861;12834279;12837426;12849416;12835897;12828507;12844997;12841583;12856045;12893782;12925033;12954655;12992194;13038652;13051003;13090580;13119218;13115900;13133151;13165310;13175349;13177401;13182328;13209790;13233774;13269618;13280857;13296565;13317892;13350401;1335…
220.21792246;12921244;12904806;12883028;12862668;12883808;12854498;12840990;12855273;12859996;12871863;12860469;12836848;12820748;12813180;12815912;12827051;12815272;12803911;12821459;12821288;12833183;12872034;12904381;12933363;12970379;13016041;13028797;13067634;13097536;13094930;13112671;13144039;13152191;13154929;13162166;13188579;13213276;13246469;13259332;13273559;13294069;13328213;13329032…
220.303184540594;12903127;12884256;12865579;12845105;12865005;12835529;12821789;12834766;12841217;12854671;12840503;12817956;12803999;12794914;12797690;12807320;12796211;12786113;12803176;12802498;12815015;12854348;12885587;12914084;12949767;12997579;13008628;13049320;13077864;13075915;13093552;13125131;13133551;13135177;13142612;13168206;13193755;13228782;13239783;13255229;13276181;13307305;1331…
220.388439322962;12885596;12868967;12847596;12826341;12847423;12818266;12805542;12819184;12824616;12837141;12825875;12801431;12786380;12776478;12780424;12790993;12778891;12768782;12786276;12784200;12798453;12836265;12869654;12897238;12935073;12979325;12992504;13031416;13060666;13059044;13075961;13106851;13118164;13119158;13126481;13151510;13177070;13211246;13222318;13235943;13255928;13290252;1329…
220.47368683558;12872803;12855807;12837342;12815756;12836127;12806830;12793328;12809753;12812928;12826410;12813169;12789395;12774687;12765557;12768986;12780916;12768236;12756917;12775145;12773873;12786263;12824526;12857203;12885971;12921979;12967202;12980357;13020073;13049286;13046838;13062969;13095128;13106785;13106657;13113396;13138270;13163440;13199362;13209509;13226955;13246828;13278880;13282…
220.558927106927;12869425;12852822;12832328;12810016;12831482;12801403;12788727;12804033;12808637;12819096;12808990;12785596;12769458;12760254;12763651;12774159;12763648;12752500;12769645;12768916;12782323;12818775;12850234;12880316;12917400;12964331;12976250;13014732;13043563;13043097;13058309;13090232;13101224;13102142;13109697;13135019;13158997;13194554;13204862;13220761;13241729;13274849;1327…
220.64416016548;12866309;12850042;12829256;12809104;12829491;12801783;12787337;12802158;12806155;12817802;12807048;12783321;12766724;12758838;12761270;12774009;12762116;12750678;12769434;12765677;12780114;12818212;12850118;12879161;12914861;12962306;12975411;13014228;13041790;13040803;13056953;13089019;13098533;13100192;13107199;13132493;13157890;13191818;13203220;13218056;13240626;13271584;13274…
220.729386039716;12873450;12856786;12836925;12815199;12836358;12808165;12793555;12807860;12812253;12823995;12813472;12789487;12772446;12764733;12768131;12779948;12769293;12759282;12775307;12773071;12786039;12824499;12855983;12885925;12921903;12968043;12981386;13020815;13048891;13049851;13064660;13096248;13106347;13106815;13114397;13140586;13164280;13199487;13210110;13225368;13244149;13278579;1328…
220.814604758112;12877716;12858138;12837539;12817406;12838380;12810797;12794971;12810478;12815539;12826249;12815031;12791929;12778069;12767288;12770074;12781544;12769913;12758631;12777866;12775285;12787712;12826799;12858629;12888290;12924948;12971604;12983282;13023069;13049565;13050056;13066272;13096588;13106726;13108745;13115124;13143813;13167117;13201484;13211545;13228710;13247405;13282156;1328…
220.899816349147;12869128;12851174;12832521;12810314;12832384;12801950;12788148;12804782;12808471;12819185;12809769;12786674;12769787;12760107;12765728;12775120;12764264;12752476;12770029;12768742;12780918;12820498;12851490;12881277;12917342;12963778;12977119;13016140;13043039;13042310;13060110;13090750;13100509;13102197;13109619;13134835;13161416;13196069;13206217;13222284;13242345;13275425;1327…
220.985020841297;12859828;12841639;12821792;12800684;12820487;12792560;12778942;12794225;12798734;12810287;12797700;12774024;12759626;12750679;12753940;12763757;12753204;12741345;12760225;12757348;12769260;12808462;12839739;12870091;12909065;12954461;12966920;13006370;13033350;13032719;13048754;13080649;13089509;13092107;13099911;13125965;13149243;13186358;13195832;13212863;13230614;13265009;1326…
221.07021826304;12883200;12865760;12844998;12825536;12844330;12815092;12801983;12817789;12821168;12833622;12821229;12797818;12782528;12774030;12777160;12787441;12774847;12766235;12784438;12780593;12793365;12832015;12863377;12894406;12930029;12978041;12989404;13029098;13058821;13056308;13074089;13105272;13115214;13116814;13122710;13147840;13174773;13209104;13220415;13236176;13256334;13289282;13290…
221.155408642853;12898216;12881915;12858836;12839942;12857599;12830754;12818312;12832056;12836760;12849134;12836531;12815322;12797630;12790548;12792909;12803589;12791706;12782236;12798160;12797326;12810600;12848539;12880470;12910262;12947532;12993813;13006057;13047147;13072999;13073373;13089900;13119716;13130148;13134273;13140405;13164041;13190541;13225479;13235729;13251868;13272242;13306562;1330…
221.240592009215;12901241;12882541;12862178;12842180;12861366;12832355;12817959;12833605;12838166;12850458;12840009;12815262;12798747;12790273;12793867;12805172;12793643;12781873;12799486;12797909;12811898;12849896;12882264;12911067;12948634;12994215;13008555;13046646;13075018;13075313;13091595;13124137;13132069;13134809;13140990;13167575;13191204;13228151;13236768;13254964;13274439;13309590;1330…
221.325768390601;12939110;12921925;12900123;12880415;12901053;12871293;12857030;12874043;12877430;12890701;12878299;12854002;12836407;12828026;12832246;12842055;12830883;12821528;12838231;12835824;12848902;12888362;12918470;12949592;12987534;13033465;13045104;13086307;13114674;13112464;13130997;13162710;13172715;13173744;13180521;13206785;13231580;13267641;13277470;13293614;13314207;13348573;1334…
221.410937815491;12958951;12943220;12921287;12900908;12919661;12890893;12877969;12893838;12898065;12910823;12897904;12874757;12858387;12849354;12853555;12863661;12850260;12840317;12858967;12855938;12870022;12908470;12941185;12970399;13007417;13053300;13068489;13107449;13135180;13135117;13152096;13182998;13192517;13194899;13202429;13229531;13253180;13290928;13299988;13315361;13335396;13369447;1337…
221.49610031236;12994233;12976186;12955023;12933143;12954789;12924974;12911504;12927481;12931574;12944657;12932913;12907925;12893765;12882828;12886678;12898648;12884648;12875031;12893464;12891423;12903177;12940753;12973669;13004013;13042855;13091009;13103302;13141962;13171403;13170695;13185813;13218013;13228026;13230114;13237179;13265145;13289587;13325392;13334521;13352598;13372873;13405633;13408…
221.581255909687;13014524;12994844;12975128;12953372;12975092;12946351;12930467;12946692;12952401;12963440;12951508;12927211;12911942;12903450;12905913;12916850;12904499;12894657;12912564;12911012;12922263;12961491;12993293;13024184;13063299;13110922;13122712;13163492;13190821;13191052;13207142;13240099;13249004;13250602;13258374;13283430;13310138;13345357;13356922;13373823;13392769;13427911;1342…
221.666404635949;13056848;13040137;13020214;12997573;13017536;12988068;12975388;12991221;12994817;13007081;12995987;12970901;12955181;12945367;12949584;12960578;12949732;12937002;12955466;12953459;12966613;13007713;13037447;13068996;13107172;13155350;13166863;13207379;13236179;13234262;13252168;13285215;13294235;13295794;13302254;13328804;13356642;13390556;13400947;13418189;13438656;13472236;1347…
221.751546519624;13105435;13088858;13069088;13047053;13065937;13035581;13022702;13039966;13043232;13054919;13044201;13018065;13002950;12992061;12998371;13008563;12996425;12986790;13002891;13000851;13014209;13054689;13087273;13117448;13154959;13201999;13215506;13255909;13284782;13282648;13301056;13333146;13344253;13344663;13350745;13378147;13405379;13440374;13451363;13468044;13489249;13521953;1352…
221.836681589188;13163136;13144872;13125330;13103890;13125218;13094525;13079979;13096120;13100969;13112851;13102402;13075941;13059796;13050389;13055127;13066084;13055282;13043743;13061178;13058468;13072796;13111161;13144678;13175018;13213108;13260193;13273074;13316426;13343837;13343418;13360845;13393211;13402952;13404438;13411982;13437953;13463859;13500132;13511860;13528480;13548252;13582410;1358…
221.92180987312;13225808;13206764;13186165;13164893;13187836;13158602;13141558;13158049;13162640;13176240;13163080;13141382;13122485;13115556;13116386;13129131;13115568;13105437;13122700;13120046;13134517;13173752;13206278;13239500;13276187;13325751;13339514;13380579;13407837;13406151;13423782;13457538;13465838;13468319;13475490;13502785;13529282;13564866;13575142;13592593;13612996;13647180;13649…
222.006931399897;13285241;13268760;13248621;13225972;13245894;13216630;13202381;13219216;13222473;13235904;13223078;13197589;13182026;13173041;13174279;13186340;13176646;13164964;13183083;13180589;13193671;13232845;13267236;13297792;13334792;13385370;13398102;13439701;13469107;13465482;13484361;13517481;13526520;13529501;13537074;13565483;13590789;13625421;13636513;13654497;13674636;13709442;1371…
222.092046197996;13327600;13309257;13288559;13267038;13286889;13256982;13243235;13258474;13264223;13274882;13264464;13238601;13224282;13212548;13217131;13228403;13214185;13204903;13222935;13219729;13234519;13274959;13306794;13338972;13377205;13425954;13439544;13481548;13510211;13509145;13525582;13558773;13570673;13571548;13579049;13606890;13632114;13669399;13681716;13697904;13718483;13754949;1375…
222.177154295894;13385413;13370675;13348620;13327949;13348787;13317226;13304027;13319849;13324985;13338162;13325179;13298908;13284379;13273549;13276381;13287965;13276145;13264744;13283035;13280500;13294751;13334414;13367325;13399097;13438441;13488674;13500126;13543576;13573516;13569424;13587237;13621371;13631952;13632796;13640190;13669778;13694506;13731926;13741445;13760470;13780979;13815798;1381…
222.26225572207;13473422;13456597;13434448;13411636;13434933;13402710;13387417;13405357;13409705;13421538;13410607;13384826;13368393;13358622;13359818;13372219;13359864;13349103;13366994;13365201;13380310;13418974;13453934;13485670;13522882;13572260;13587758;13629907;13659534;13657060;13675284;13708605;13719150;13721142;13729489;13757441;13784847;13820547;13830156;13848113;13869765;13903688;13909…
222.347350505;13554610;13536716;13515691;13493130;13514693;13482634;13468801;13485640;13491530;13501954;13490100;13463629;13448118;13438518;13442119;13452797;13439804;13428353;13448619;13446368;13460165;13501439;13535128;13566622;13606289;13654956;13669258;13712793;13741967;13740137;13757327;13791319;13802049;13806653;13812808;13841263;13868044;13904151;13913449;13931327;13954087;13988715;1399119…
222.432438673162;13630779;13613162;13591210;13568951;13590311;13559533;13545523;13560523;13566671;13580321;13568144;13542610;13524248;13514528;13519716;13529257;13518616;13506336;13523899;13521900;13535592;13577251;13612165;13643300;13682316;13734004;13747906;13790051;13819616;13817536;13836390;13870119;13879766;13882521;13889838;13919958;13946680;13982732;13993377;14010209;14034088;14069717;1407…
222.517520255034;13712771;13695602;13672928;13650020;13673080;13641157;13626830;13644199;13648834;13660647;13648726;13622642;13606240;13596467;13599587;13609938;13598065;13586355;13604807;13604441;13617593;13658126;13694312;13724435;13765467;13815223;13829271;13875477;13903623;13903391;13920870;13954427;13964949;13966288;13973793;14002961;14029572;14067490;14077648;14096265;14118824;14154534;1415…
222.602595279092;13804876;13784830;13761843;13738234;13762017;13729122;13715764;13733375;13737600;13749757;13737882;13711956;13695426;13682522;13688201;13699627;13685968;13675306;13694611;13693110;13704754;13746929;13783050;13813817;13854403;13904476;13920708;13963671;13994487;13993115;14012549;14046712;14056142;14057602;14063872;14095559;14121743;14160004;14170396;14189268;14211003;14246166;1425…
222.687663773815;13899095;13880240;13857725;13834648;13856996;13824897;13808647;13828333;13833887;13845077;13833841;13806645;13789056;13778784;13782542;13794640;13780190;13770009;13788457;13786923;13800583;13842549;13878063;13909409;13950973;14002802;14016758;14060683;14092099;14089976;14107661;14142673;14153858;14154389;14163631;14193839;14219474;14258422;14267469;14287069;14310869;14345878;1434…
222.77272576768;14022521;14002273;13980977;13954074;13979514;13946910;13932036;13948527;13954029;13967957;13955341;13928268;13910164;13899137;13904489;13917360;13902592;13890313;13909643;13907405;13921823;13965246;14000262;14033825;14073836;14126386;14139634;14184426;14214292;14213606;14233299;14268167;14278172;14280884;14288930;14318625;14344765;14383225;14395652;14412770;14436649;14472931;14475…
222.857781289164;14111047;14091948;14068572;14044756;14068955;14035928;14021584;14038715;14044497;14057202;14044800;14017831;14000602;13989563;13992928;14006877;13993087;13979293;13999706;13997497;14012146;14055410;14090725;14123604;14165569;14217207;14232177;14276356;14307433;14306322;14324918;14360768;14369512;14373084;14380795;14411325;14438866;14476147;14487426;14506554;14530047;14566039;1456…
222.942830366744;14213048;14193920;14171518;14147616;14170788;14139620;14122459;14140424;14144191;14160108;14147118;14119233;14101543;14090829;14094356;14105345;14092211;14081099;14100047;14098513;14112903;14155840;14192380;14226295;14267961;14317981;14333404;14379746;14410850;14409916;14429278;14462811;14475690;14477201;14485771;14514177;14542161;14582709;14592188;14612331;14635449;14671624;1467…
223.027873028899;14334101;14316295;14294768;14268679;14292050;14259942;14242695;14261922;14266881;14279444;14268596;14240045;14222732;14212113;14215833;14227656;14213994;14204324;14221980;14221036;14232734;14278757;14314127;14348141;14391251;14443094;14457820;14504123;14535317;14533300;14552827;14588078;14599006;14602973;14609226;14641240;14667906;14709117;14719065;14737644;14759207;14798233;1480…
223.112909304105;14448348;14428600;14405950;14379947;14405887;14370700;14356012;14375215;14378198;14393369;14379795;14352703;14333629;14323289;14327468;14339116;14323327;14313882;14332564;14332869;14345720;14390470;14427356;14459703;14502879;14555969;14571522;14618035;14648524;14647918;14668160;14703674;14713741;14716965;14723593;14754940;14782449;14822778;14835409;14853812;14876700;14913622;1491…
223.19793922084;14562644;14545250;14519415;14493998;14519348;14485769;14469092;14488753;14492920;14507518;14494506;14467301;14448608;14436199;14442730;14452817;14438128;14427270;14447181;14443497;14458955;14504798;14541352;14574630;14618199;14671587;14686804;14733556;14765460;14763092;14783667;14820067;14830510;14835040;14840096;14873247;14901748;14942236;14952951;14972534;14994933;15033438;15037…
223.282962807581;14689032;14669777;14646869;14619719;14644680;14612576;14593562;14615096;14619157;14632940;14621635;14591645;14574003;14563366;14567080;14578894;14563616;14553848;14574230;14571265;14586262;14631162;14668192;14702128;14745094;14800446;14814664;14861360;14894524;14893339;14913955;14950289;14961233;14963943;14970500;15004055;15034540;15073035;15083875;15103175;15127867;15166211;1516…
223.367980092807;14821423;14802754;14776828;14752587;14778257;14742987;14728835;14747056;14753380;14765151;14750757;14723637;14704186;14693457;14697579;14710329;14696268;14684398;14703288;14700134;14715719;14762662;14801536;14835136;14878807;14934014;14949775;14997538;15031102;15027292;15047647;15085499;15095523;15096911;15106254;15139256;15168365;15207423;15220016;15239163;15264651;15302658;1530…
223.452991104993;14953717;14934513;14909491;14883164;14909012;14875123;14857974;14877369;14881389;14896445;14884362;14854495;14834590;14823219;14828187;14841495;14824663;14815209;14835218;14830685;14846787;14894138;14930721;14965017;15011577;15067526;15083383;15128950;15162326;15160314;15182563;15220481;15230374;15233137;15239848;15273624;15303634;15344489;15355912;15376187;15400711;15440654;1544…
223.537995872619;15094709;15073385;15050433;15023055;15050137;15014551;14997525;15017585;15022903;15038006;15024664;14993737;14976018;14963427;14968320;14980810;14964569;14953709;14974186;14972635;14986907;15033260;15073086;15109806;15153622;15208482;15225675;15273882;15306301;15304684;15325403;15363553;15376224;15377612;15384661;15417680;15447743;15488731;15501234;15522341;15546436;15585728;1558…
223.62299442416;15253842;15233282;15208279;15180194;15208063;15172705;15157556;15176034;15181514;15194897;15181595;15153804;15133385;15123119;15124502;15138669;15123896;15110496;15133828;15129126;15144459;15191816;15231932;15266019;15314343;15371397;15385019;15434686;15467597;15466537;15488901;15526360;15537127;15539402;15548450;15581082;15611653;15653998;15664476;15685803;15710276;15751345;15753…
223.707986788095;15410506;15390101;15367439;15337238;15365342;15328804;15312257;15331181;15336178;15351207;15337995;15308581;15289600;15278589;15281743;15293400;15279241;15267219;15287860;15286089;15299897;15349188;15388425;15425480;15470422;15529003;15542471;15592588;15628113;15626526;15647119;15685227;15697496;15700050;15708871;15741162;15772198;15815628;15824728;15848417;15872463;15911737;1591…
223.792972992901;15555455;15534461;15510067;15482782;15508522;15473530;15457070;15476801;15481408;15497020;15484047;15451715;15433718;15421946;15426319;15437434;15421593;15410642;15429982;15429168;15445531;15493934;15531848;15569459;15615062;15674058;15688658;15740344;15775728;15774223;15794178;15833113;15846842;15849439;15855721;15890388;15921502;15963652;15975145;15997554;16024166;16064207;1606…
223.877953067056;15707088;15690514;15664394;15634305;15662466;15626215;15610022;15629533;15634986;15650641;15637913;15606874;15585600;15573380;15579213;15589926;15574734;15563100;15585660;15582170;15598602;15646047;15687562;15722877;15771027;15830421;15845253;15895694;15931113;15929696;15952002;15992269;16003200;16005910;16014054;16048757;16078973;16123241;16135122;16157049;16182555;16223955;1622…
223.962927039036;15865183;15842642;15816927;15789658;15816982;15780322;15762875;15783184;15789578;15803870;15789005;15757437;15740229;15725837;15730310;15744462;15727250;15715336;15738719;15736659;15749944;15801356;15840706;15878802;15927199;15985358;16003146;16053921;16087836;16087630;16109072;16148000;16161323;16164291;16171307;16206950;16239098;16282271;16292118;16315848;16342471;16385818;1638…
224.04789493732;16026327;16005084;15979679;15951219;15978164;15940601;15923817;15943574;15951807;15964467;15952481;15922662;15900142;15886757;15892064;15904812;15888433;15876878;15897028;15896331;15913823;15962761;16003377;16040627;16089887;16150340;16168800;16217722;16253869;16249790;16273456;16315325;16326092;16329573;16335146;16372252;16406298;16448309;16460741;16483948;16510589;16550960;16555…
224.132856790385;16195908;16172876;16148103;16120149;16146773;16110100;16091488;16112459;16119652;16134661;16120203;16088311;16068856;16053954;16059363;16073396;16056341;16045004;16066249;16064835;16080485;16130109;16171234;16211095;16259239;16320350;16337497;16390859;16424834;16421891;16445108;16486803;16499377;16503147;16510449;16546193;16579273;16624852;16634664;16658500;16685629;16727929;1673…
224.217812626708;16368410;16346019;16319068;16291764;16317664;16280234;16263636;16284358;16291451;16304623;16290678;16258558;16237092;16224556;16230743;16243955;16227856;16214855;16237402;16233273;16251620;16301400;16343316;16382022;16431783;16494798;16511758;16565637;16600188;16599472;16620201;16663687;16674890;16678368;16684769;16723877;16757203;16800200;16813057;16834050;16862475;16907852;1690…
224.302762474766;16540881;16517923;16491666;16461888;16490347;16451364;16433382;16456224;16462280;16477922;16464297;16430299;16408431;16396483;16401715;16415260;16397146;16385256;16408983;16405598;16421758;16474353;16517624;16555360;16606091;16668251;16685737;16739144;16776699;16771354;16797418;16838921;16851372;16853757;16863277;16900371;16933447;16978907;16991503;17015679;17042664;17086742;1708…
224.387706363038;16714931;16692343;16665225;16633850;16662819;16624792;16607214;16627932;16636093;16649707;16636696;16603190;16578902;16566883;16573575;16584596;16568314;16555481;16579417;16574984;16593609;16646552;16688839;16729264;16778984;16841202;16860278;16914818;16952264;16949515;16972596;17016075;17029424;17033428;17040606;17078774;17112106;17158124;17170161;17193727;17219600;17266185;1726…
224.47264432;16915413;16894035;16866821;16835088;16864332;16825895;16806860;16830491;16836953;16851267;16837059;16802308;16780878;16766966;16773032;16786423;16770108;16755098;16780753;16777992;16793630;16848136;16891607;16931986;16982498;17046236;17064426;17118172;17157292;17155032;17178539;17220137;17234298;17238694;17246563;17282778;17318590;17364224;17377352;17401453;17428534;17472215;17477698…
224.55757637413;17102463;17078969;17050580;17018927;17051008;17010439;16991927;17012506;17020526;17034845;17020157;16987104;16967277;16951396;16956653;16969579;16954257;16939810;16964385;16960204;16978480;17031665;17076515;17116854;17168514;17232691;17248851;17306376;17346951;17342839;17366772;17410490;17423217;17427183;17436918;17474376;17509224;17556505;17567591;17591457;17622166;17664387;17668…
224.642502553906;17286239;17263789;17234885;17202530;17232806;17193689;17174381;17197663;17203587;17220780;17203769;17171062;17148809;17134587;17140830;17155462;17136196;17123462;17147825;17144457;17162015;17216469;17259264;17303124;17352999;17419265;17438010;17493094;17532898;17532293;17556460;17599743;17611555;17615150;17626129;17665054;17696619;17745459;17757811;17783777;17813896;17855879;1786…
224.727422887804;17490206;17465383;17438533;17405559;17438579;17396591;17376025;17400991;17409045;17423334;17407924;17373721;17349419;17336787;17343379;17357921;17338620;17324431;17350027;17347598;17364974;17420990;17464598;17505075;17559253;17625082;17643901;17700876;17738096;17738738;17761996;17807251;17821992;17825609;17833255;17872641;17907179;17955214;17967002;17993078;18025127;18068870;1807…
224.812337404303;17684922;17660406;17631380;17600130;17631443;17588709;17570250;17595836;17603233;17615793;17602207;17567521;17544848;17531120;17536730;17548924;17531345;17517436;17543155;17539721;17558335;17613693;17658305;17702907;17756164;17821916;17842189;17898682;17936907;17934324;17961238;18007182;18019037;18023372;18033291;18073380;18105758;18157345;18168969;18194471;18226174;18271807;1827…
224.89724613188;17897121;17872909;17844330;17810699;17843297;17800339;17783046;17803088;17812998;17826951;17813112;17776407;17753450;17738309;17744718;17759207;17742286;17727360;17752900;17748572;17764994;17823856;17871884;17914598;17968383;18036878;18055514;18115479;18154825;18149825;18178042;18222787;18235965;18240737;18250519;18290052;18325391;18376225;18386213;18413064;18443785;18490065;18494…
224.982149099012;18101500;18077974;18048203;18015761;18047710;18004464;17985347;18008364;18015339;18031775;18019191;17982073;17957870;17944112;17947778;17962868;17943127;17928153;17955636;17952602;17969921;18027027;18077240;18117437;18173369;18242325;18261912;18319746;18361781;18357667;18384455;18430411;18445665;18450288;18456675;18498959;18534760;18585635;18595305;18624423;18655264;18700268;1870…
225.067046334176;18312035;18287167;18256894;18224868;18258305;18213858;18193551;18218215;18225157;18243267;18225675;18190742;18166561;18149747;18156694;18173778;18151197;18138176;18165613;18162319;18181476;18239886;18286945;18330421;18387730;18455876;18475265;18534539;18575651;18573052;18601036;18646325;18659150;18665168;18672955;18714629;18751254;18800745;18814719;18841063;18872699;18920973;1892…
225.151937865851;18517941;18492292;18461439;18428226;18463224;18419333;18397964;18421704;18430362;18447225;18430818;18394156;18369674;18352188;18360223;18376096;18357405;18341249;18366508;18363649;18386569;18443329;18492671;18537138;18594116;18663284;18682376;18742542;18782370;18781203;18808450;18855631;18871087;18873773;18882989;18924629;18961934;19014083;19024023;19053853;19086921;19134507;1913…
225.236823722513;18728498;18702759;18672881;18639726;18671934;18628342;18606301;18633541;18639964;18659716;18640672;18603439;18579325;18565502;18570634;18585937;18566219;18551577;18577007;18574423;18592717;18655181;18703078;18748375;18805854;18874160;18895211;18956928;18999422;18996219;19023641;19072175;19087316;19088423;19100560;19143090;19180716;19230934;19244032;19273377;19303420;19354373;1935…
225.32170393264;18931460;18905498;18875343;18840782;18873003;18830601;18809787;18834115;18842816;18858407;18842976;18803599;18779851;18766302;18770106;18787918;18767888;18752351;18778497;18775300;18793918;18856238;18904905;18950363;19007986;19081434;19099574;19161649;19208014;19202983;19229539;19277837;19295130;19294994;19307395;19350475;19388200;19441243;19453797;19480339;19515693;19562961;19567…
225.406578524709;19147673;19122979;19088270;19056245;19090211;19045226;19022981;19050012;19058073;19072788;19058523;19019820;18995465;18979755;18985394;19002582;18981361;18968206;18993716;18990972;19009662;19071498;19122163;19168068;19227029;19299857;19320518;19384499;19424798;19422990;19451185;19499674;19515128;19518020;19529059;19571602;19609002;19663674;19676411;19703826;19737338;19786868;1979…
225.491447527199;19375706;19349875;19316945;19280864;19318578;19272825;19249363;19275267;19285099;19301378;19284863;19244631;19222764;19203712;19210491;19228064;19206682;19191116;19218236;19217278;19234988;19298011;19348896;19394660;19455098;19527376;19549548;19614379;19657209;19652867;19679705;19731148;19746605;19750570;19761009;19805012;19843719;19896840;19909129;19938924;19973546;20022886;2002…
225.576310968585;19605152;19579806;19548287;19511727;19548156;19499960;19479884;19506867;19513583;19531088;19514489;19475407;19450948;19433115;19438819;19454836;19434697;19420179;19449793;19444839;19464462;19528851;19579160;19625461;19685193;19760289;19781148;19846151;19889451;19886157;19916321;19965263;19980412;19985239;19996031;20040576;20078413;20133849;20147153;20175053;20208297;20262489;2026…
225.661168877347;19843219;19813231;19782059;19745379;19781958;19736162;19714806;19740033;19747611;19767447;19748924;19710011;19683005;19665688;19671549;19691144;19667257;19653296;19683454;19677519;19697423;19764064;19814322;19861919;19922209;19999495;20021305;20085994;20126620;20124826;20155564;20205503;20220791;20227119;20236864;20282660;20322649;20377959;20389414;20422040;20455349;20505484;2051…
225.74602128196;20052238;20024091;19991045;19954169;19991869;19943811;19921834;19947282;19956123;19974463;19955675;19920384;19890856;19874634;19881111;19899493;19875580;19859287;19889437;19885660;19904664;19970709;20025081;20071198;20133507;20209429;20232115;20297370;20340990;20340275;20368476;20421847;20437633;20443200;20450670;20497544;20537465;20594501;20606170;20637472;20670888;20724226;20729…
225.830868210903;20273558;20246558;20211991;20176936;20209662;20165334;20140589;20171191;20178941;20198067;20178886;20137744;20112296;20093606;20101524;20119569;20096390;20079882;20108325;20107044;20125714;20191085;20246285;20295060;20356747;20434999;20457185;20524274;20569863;20566935;20595308;20649509;20663485;20666085;20678275;20724879;20767638;20822092;20836318;20865816;20899666;20953639;2095…
225.915709692653;20519165;20491090;20455502;20416874;20456631;20406728;20384480;20412102;20422398;20439688;20421693;20381441;20354951;20335057;20344933;20361812;20338795;20324410;20353284;20348685;20370136;20437767;20492527;20538956;20601851;20681174;20701697;20771198;20816291;20813803;20845163;20897378;20911808;20915602;20929028;20974323;21015620;21073166;21088324;21116807;21153389;21204935;2120…
226.000545755688;20746396;20717495;20684851;20647459;20684631;20635353;20611690;20641374;20649648;20667403;20649337;20608184;20581848;20563607;20569779;20588850;20566063;20550244;20579736;20575264;20597415;20664521;20717374;20769424;20835161;20912145;20935258;21002496;21048462;21046650;21078688;21132614;21146831;21149512;21161189;21208954;21251900;21307792;21322893;21354715;21390031;21443068;2144…
226.085376428484;20983301;20954025;20920484;20884758;20919573;20871284;20847873;20877681;20885076;20903113;20885469;20844888;20817080;20796791;20803963;20823429;20797702;20781949;20813787;20810101;20831336;20900965;20953620;21006141;21069656;21150606;21173983;21243309;21289183;21286532;21317838;21373285;21388480;21392079;21405239;21451613;21494417;21552984;21565761;21598213;21633191;21687947;2169…
226.17020173952;21213979;21184393;21150590;21110384;21149394;21100954;21075170;21106243;21112339;21132446;21116629;21073130;21044186;21025599;21033554;21052650;21027410;21010379;21040758;21038803;21058281;21128956;21184464;21236560;21301128;21383098;21403988;21477210;21523774;21517497;21552677;21607496;21623940;21628456;21639352;21685679;21732270;21790151;21801127;21834730;21871712;21926909;21930…
[truncated: 74 more rows]
[truncated: 3,361 more columns]
