# Supplementary material for: A miniDOAS instrument optimised for ammonia field measurements
Source: Copernicus journal article supplement (doi:10.5194/amt-9-2721-2016), 2016-06-29
Supplement: Supplementary file 2 [file amt-9-2721-2016-supplement.zip › miniDOAS_Revaluation_basic_20150513/1_Reference_Spectra/miniDOAS-ref_cal_spec-Eval201602170000/miniDOAS_darkN2calSpec_201410281503-201410281506-Eval201602170000.txt]

reference file calculation performed on: 201602170000
spectrometer: QE65000 serial-QEPB0591, grating-2400
conditions: dark measurement N2
cuvette length (m): 0.075
accumulation: averaged 3 avg spectra with 855 spectra each
averaging period: 201410281503-201410281506
avg. spectrometer integration time (ms): 70
avg. TEC temperature (deg C): -10
avg. DOAS temperature (deg C): 30.97
---
2396.13177387914
2392.78401559454
2392.44522417154
2392.48070175439
2392.71072124756
2392.21247563353
2392.11968810916
2392.26588693957
2392.53216374269
2392.53918128655
2392.50409356725
2392.24249512671
2392.40233918129
2392.44600389864
2392.44444444444
2392.40857699805
2392.32475633528
2392.23937621832
2392.31890838207
2392.43703703704
2392.39727095517
2392.4962962963
2392.39298245614
2392.40233918129
2392.43157894737
2392.63079922027
2392.61910331384
2392.61910331384
2392.57972709552
2392.47953216374
2392.5559454191
2392.54619883041
2392.53801169591
2392.62417153996
2392.5485380117
2392.53099415205
2392.56803118908
2392.59376218324
2392.56842105263
2392.62144249513
2392.74230019493
2392.82768031189
2392.70721247563
2392.76530214425
2392.76803118908
2392.67290448343
2392.81052631579
2392.68927875244
2392.77972709552
2392.70994152047
2392.74970760234
2392.78011695906
2392.7910331384
2392.75945419103
2392.79844054581
2392.79493177388
2392.9567251462
2392.86159844055
2392.90487329435
2392.94269005848
2392.92085769981
2392.99688109162
2393.01403508772
2392.98323586745
2393.0081871345
2392.85925925926
2392.98752436647
2392.89239766082
2392.94346978557
2393.00350877193
2392.99805068226
2393.01754385965
2393.06822612086
2393.16023391813
2393.14892787524
2393.16842105263
2393.14035087719
2393.14619883041
2393.14113060429
2393.23001949318
2393.23742690058
2393.11929824561
2393.05419103314
2393.15516569201
2393.05964912281
2393.10409356725
2393.12280701754
2393.13411306043
2393.28849902534
2393.19220272904
2393.19961013645
2393.19142300195
2393.30292397661
2393.19493177388
2393.55477582846
2393.50916179337
2393.21481481481
2393.26822612086
2393.1567251462
2393.17115009747
2393.17855750487
2393.22183235867
2393.24717348928
2393.17972709552
2393.41949317739
2393.29122807018
2393.30955165692
2393.39454191033
2393.33489278752
2393.41598440546
2393.46627680312
2393.48382066277
2393.32319688109
2393.28031189084
2393.41286549708
2393.38908382066
2393.36959064327
2393.52865497076
2393.39571150097
2393.41130604288
2393.41403508772
2393.50409356725
2393.49785575049
2393.56257309942
2393.5649122807
2393.50058479532
2393.70175438596
2393.53606237817
2393.34113060429
2393.51461988304
2393.55477582846
2393.43898635478
2393.4604288499
2393.49590643275
2393.33372319688
2393.46315789474
2393.6179337232
2393.64639376218
2393.54892787524
2393.60194931774
2393.5306042885
2393.6701754386
2393.58401559454
2393.62923976608
2393.49395711501
2393.53606237817
2393.57582846004
2393.49083820663
2393.54074074074
2393.58830409357
2393.52670565302
2393.59493177388
2393.73177387914
2393.69317738791
2393.68265107212
2393.75204678363
2393.63118908382
2393.60662768031
2393.63937621832
2393.67329434698
2393.62222222222
2393.64054580897
2393.51929824561
2393.65730994152
2393.63118908382
2393.64834307992
2393.61013645224
2393.73489278752
2393.73450292398
2393.61910331384
2393.76257309942
2393.81169590643
2393.78791423002
2393.79025341131
2393.73138401559
2393.69746588694
2393.62144249513
2393.58128654971
2393.83547758285
2393.6955165692
2393.82651072125
2393.77855750487
2393.67329434698
2393.69746588694
2393.81676413255
2393.78869395711
2393.87368421053
2393.81481481481
2393.83079922027
2393.93177387914
2393.89902534113
2393.74658869396
2393.68576998051
2393.68849902534
2393.65575048733
2393.69863547758
2393.78674463938
2393.75126705653
2393.73996101365
2393.75204678363
2393.82417153996
2393.87719298246
2393.91384015595
2393.98167641326
2393.88187134503
2393.85692007797
2393.97115009747
2393.81637426901
2393.76608187134
2393.82339181287
2394.06198830409
2393.91228070175
2394.08265107212
2393.95282651072
2393.91734892788
2393.86666666667
2393.92631578947
2393.95984405458
2393.87992202729
2393.92124756335
2393.922417154
2393.91111111111
2393.95126705653
2393.95633528265
2393.82144249513
2393.83820662768
2393.877582846
2393.95399610136
2393.87953216374
2393.83313840156
2393.89707602339
2394.01130604288
2393.8693957115
2394.05185185185
2394.08538011696
2394.05692007797
2394.02066276803
2393.92553606238
2394.09473684211
2393.93918128655
2393.92280701754
2393.99844054581
2393.89083820663
2393.89200779727
2393.93840155945
2393.88343079922
2393.95243664717
2393.90682261209
2393.96920077973
2394.08187134503
2394.13255360624
2394.07992202729
2393.94191033138
2394.04678362573
2394.14892787524
2394.04132553606
2393.91228070175
2393.96530214425
2393.95750487329
2393.91656920078
2393.98479532164
2394.03118908382
2394.00623781676
2393.94970760234
2394.0604288499
2394.14658869396
2394.11500974659
2394.02027290448
2394.03937621832
2394.0261208577
2394.12358674464
2394.15360623782
2394.04522417154
2393.98557504873
2394.10760233918
2394.14931773879
2393.96101364522
2393.9738791423
2394.05730994152
2393.98089668616
2394.19415204678
2394.02573099415
2394.18401559454
2394.2440545809
2394.14307992203
2394.13372319688
2394.17933723197
2394.09512670565
2394.04951267057
2394.02573099415
2394.11773879142
2394.07095516569
2394.14385964912
2394.04093567251
2394.09395711501
2394.12085769981
2394.28888888889
2394.21013645224
2394.25808966862
2394.15789473684
2394.21247563353
2394.33645224172
2394.29512670565
2394.16062378168
2394.0783625731
2394.15516569201
2394.28927875244
2394.08576998051
2394.17972709552
2394.07485380117
2394.19571150097
2394.09395711501
2394.2179337232
2394.21442495127
2394.34892787524
2394.28888888889
2394.15126705653
2394.23040935672
2394.21559454191
2394.24171539961
2394.21871345029
2394.14230019493
2394.14931773879
2394.20662768031
2394.20857699805
2394.18050682261
2394.20311890838
2394.12631578947
2394.29902534113
2394.26588693957
2394.36881091618
2394.2269005848
2394.31111111111
2394.29941520468
2394.27446393762
2394.24522417154
2394.20506822612
2394.18050682261
2394.09395711501
2394.24717348928
2394.19064327485
2394.19532163743
2394.13489278752
2394.18050682261
2394.28304093567
2394.28109161793
2394.33372319688
2394.19415204678
2394.29785575049
2394.23664717349
2394.19415204678
2394.26198830409
2394.2701754386
2394.23196881092
2394.26783625731
2394.27875243665
2394.03976608187
2394.1567251462
2394.46510721248
2394.06783625731
2394.21988304094
2394.30409356725
2394.28849902534
2394.17777777778
2394.28849902534
2394.21559454191
2394.31812865497
2394.18011695906
2394.20701754386
2394.12007797271
2394.22300194932
2394.25536062378
2394.2343079922
2394.14541910331
2394.25808966862
2394.30682261209
2394.22144249513
2394.3216374269
2394.34230019493
2394.22066276803
2394.30097465887
2394.24093567251
2394.36803118908
2394.2514619883
2394.23469785575
2394.28966861598
2394.1910331384
2394.21364522417
2394.26432748538
2394.2253411306
2394.24288499025
2394.20857699805
2394.37621832359
2394.3216374269
2394.2432748538
2394.34385964912
2394.30292397661
2394.36218323587
2394.3298245614
2394.33294346979
2394.34230019493
2394.16218323587
2394.2522417154
2394.22378167641
2394.17738791423
2394.22027290448
2394.25107212476
2394.18869395711
2394.29902534113
2394.38752436647
2394.42495126706
2394.40740740741
2394.30760233918
2394.35321637427
2394.39337231969
2394.49707602339
2394.12904483431
2394.19454191033
2394.30916179337
2394.25107212476
2394.31033138402
2394.19961013645
2394.24288499025
2394.25263157895
2394.4440545809
2394.31851851852
2394.26276803119
2394.24522417154
2394.35321637427
2394.29824561404
2394.2604288499
2394.2693957115
2394.28576998051
2394.27992202729
2394.30487329435
2394.13723196881
2394.24873294347
2394.1918128655
2394.21871345029
2394.25380116959
2394.32904483431
2394.45847953216
2394.34814814815
2394.41559454191
2394.46549707602
2394.24444444444
2394.40467836257
2394.28810916179
2394.21676413255
2394.19532163743
2394.25847953216
2394.22378167641
2394.54541910331
2394.28421052632
2394.40701754386
2394.24912280702
2394.31033138402
2394.4604288499
2394.40311890838
2394.40389863548
2394.29746588694
2394.3395711501
2394.51656920078
2394.57231968811
2394.35282651072
2394.28031189084
2394.31578947368
2394.29434697856
2394.40389863548
2394.42807017544
2394.44639376218
2394.37582846004
2394.47485380117
2394.37660818713
2394.43781676413
2394.28888888889
2394.32436647174
2394.54463937622
2394.53684210526
2394.32904483431
2394.28382066277
2394.31851851852
2394.35204678363
2394.31189083821
2394.34385964912
2394.40155945419
2394.32748538012
2394.35165692008
2394.41130604288
2394.31461988304
2394.59064327485
2394.48810916179
2394.43079922027
2394.46822612086
2394.39376218324
2394.44054580897
2394.47446393762
2394.34307992203
2394.49434697856
2394.47602339181
2394.31617933723
2394.32865497076
2394.44678362573
2394.338791423
2394.48771929825
2394.52514619883
2394.40428849903
2394.37270955166
2394.45575048733
2394.39025341131
2394.42261208577
2394.44483430799
2394.46276803119
2394.29473684211
2394.31812865497
2394.43157894737
2394.35789473684
2394.37037037037
2394.36920077973
2394.38362573099
2394.46744639376
2394.49980506823
2394.46861598441
2394.40935672515
2394.49356725146
2394.46237816764
2394.47914230019
2394.38869395712
2394.21364522417
2394.46003898635
2394.36530214425
2394.34814814815
2394.36452241715
2394.42066276803
2394.33333333333
2394.36842105263
2394.51384015595
2394.43001949318
2394.43157894737
2394.56296296296
2394.56374269006
2394.44288499025
2394.50994152047
2394.42846003899
2394.49590643275
2394.36218323587
2394.4081871345
2394.35321637427
2394.53489278752
2394.30136452242
2394.44015594542
2394.29434697856
2394.54307992203
2394.39961013645
2394.36257309941
2394.41520467836
2394.45341130604
2394.43742690058
2394.53372319688
2394.42495126706
2394.42456140351
2394.43235867446
2394.31072124756
2394.38245614035
2394.41130604288
2394.33918128655
2394.37076023392
2394.37777777778
2394.47134502924
2394.5477582846
2394.4873294347
2394.53801169591
2394.36881091618
2394.35516569201
2394.55204678363
2394.44288499025
2394.44210526316
2394.39337231969
2394.38167641326
2394.33996101365
2394.36101364522
2394.41442495127
2394.41325536062
2394.34424951267
2394.56764132554
2394.46198830409
2394.40389863548
2394.54307992203
2394.49941520468
2394.55906432749
2394.49317738791
2394.51734892788
2394.55750487329
2394.32514619883
2394.4604288499
2394.34892787524
2394.38401559454
2394.4269005848
2394.48031189084
2394.37660818713
2394.40272904483
2394.45497076023
2394.48615984405
2394.55867446394
2394.62261208577
2394.5216374269
2394.55750487329
2394.52007797271
2394.40311890838
2394.36686159844
2394.54931773879
2394.42807017544
2394.49668615984
2394.37426900585
2394.51851851852
2394.4
2394.53294346979
2394.42144249513
2394.43742690058
2394.4955165692
2394.49239766082
2394.47212475634
2394.63118908382
2394.44093567251
2394.55048732943
2394.45536062378
2394.53567251462
2394.40662768031
2394.40974658869
2394.40662768031
2394.37738791423
2394.5126705653
2394.56374269006
2394.49590643275
2394.58245614035
2394.53021442495
2395.01676413255
2394.61637426901
2394.50916179337
2394.58518518519
2394.53333333333
2394.52631578947
2394.51851851852
2394.51656920078
2394.56647173489
2394.39805068226
2394.6253411306
2394.56530214425
2394.58401559454
2394.6171539961
2394.59961013645
2394.59610136452
2394.67329434698
2394.5820662768
2394.49122807018
2394.51734892788
2394.58011695906
2394.45029239766
2394.538791423
2394.51150097466
2394.53333333333
2394.39064327485
2394.54346978557
2394.41949317739
2394.83040935673
2394.56647173489
2394.65185185185
2394.66159844055
2394.57037037037
2394.4865497076
2394.60389863548
2394.52358674464
2394.52553606238
2394.57076023392
2394.54269005848
2394.44639376218
2394.42105263158
2394.50175438596
2394.65653021442
2394.46510721248
2394.53255360624
2394.5910331384
2394.44210526316
2394.53723196881
2394.5820662768
2394.57699805068
2394.55282651072
2394.59259259259
2394.46471734893
2394.4440545809
2394.4955165692
2394.47212475634
2394.42183235867
2394.4171539961
2394.49980506823
2394.54269005848
2394.57504873294
2394.62807017544
2394.60311890838
2394.64093567251
2394.59025341131
2394.77855750487
2394.57504873294
2394.46003898635
2394.56725146199
2394.49200779727
2394.42261208577
2394.52475633528
2394.50526315789
2394.4440545809
2394.53996101365
2394.44132553606
2394.5216374269
2394.50331384016
2394.67095516569
2394.55711500975
2394.51812865497
2394.59220272904
2394.64717348928
2394.51968810916
2394.64288499025
2394.52748538012
2394.49668615984
2394.50058479532
2394.52631578947
2394.41091617934
2394.62261208577
2394.54385964912
2394.54346978557
2394.58557504873
2394.76335282651
2394.68382066277
2394.57115009747
2394.54152046784
2394.68187134503
2394.52592592593
2394.58713450292
2394.522417154
2394.63547758285
2394.39376218324
2394.49317738791
2394.54152046784
2394.59844054581
2394.50409356725
2394.56335282651
2394.64054580897
2394.56218323587
2394.69512670565
2394.59025341131
2394.5044834308
2394.58089668616
2394.4783625731
2394.61091617934
2394.52046783626
2394.5649122807
2394.49434697856
2394.55009746589
2394.50877192982
2394.61130604289
2394.49746588694
2394.57076023392
2394.63625730994
2394.69902534113
2394.71150097466
2394.56530214425
2394.51150097466
2394.66978557505
2394.61013645224
2394.48693957115
2394.44015594542
2394.49473684211
2394.56218323587
2394.48031189084
2394.55477582846
2394.63859649123
2394.45185185185
2394.58167641326
2394.59532163743
2394.62495126706
2394.51072124756
2394.78635477583
2394.65614035088
2394.70409356725
2394.63196881092
2394.53177387914
2394.53762183236
2394.45925925926
2394.5208576998
2394.64561403509
2394.56023391813
2394.61637426901
2394.60467836257
2394.57972709552
2394.55204678363
2394.63274853801
2394.60545808967
2394.56413255361
2394.90253411306
2394.64366471735
2394.54269005848
2394.49356725146
2394.51150097466
2394.49746588694
2394.53294346979
2394.52514619883
2394.58323586745
2394.63313840156
2394.51384015595
2394.62183235867
2394.55087719298
2394.7126705653
2394.63118908382
2394.77777777778
2394.61130604289
2394.69707602339
2394.66237816764
2394.45886939571
2394.50916179337
2394.52709551657
2394.59220272904
2394.5306042885
2394.54035087719
2394.73021442495
2394.66744639376
2394.75126705653
2394.68421052632
2394.61871345029
2394.68187134503
2394.64171539961
2394.60467836257
2394.61169590643
2394.66510721248
2394.56101364522
2394.50565302144
2394.6440545809
2394.56452241715
2394.64483430799
2394.56296296296
2394.59805068226
2394.48888888889
2394.55399610136
2394.6514619883
2394.68771929825
2394.62378167641
2394.63859649123
2394.53138401559
2394.6343079922
2394.64210526316
2394.56179337232
2394.56959064327
2394.60584795322
2394.59532163743
2394.60428849903
2394.56725146199
2394.69941520468
2394.55438596491
2394.73684210526
2394.61559454191
2394.67251461988
2394.64600389864
2394.72358674464
2394.76101364522
2394.87329434698
2394.64483430799
2394.56959064327
2394.57192982456
2394.63391812865
2394.54385964912
2394.57855750487
2394.55828460039
2394.47173489279
2394.64093567251
2394.70058479532
2394.7649122807
2394.63625730994
2394.7746588694
2394.72475633528
2394.61598440546
2394.68265107212
2394.64951267057
2394.70058479532
2394.67251461988
2394.60194931774
2394.68693957115
2394.71423001949
2394.6693957115
2394.58752436647
2394.52748538012
2394.71812865497
2394.66159844055
2394.59532163743
2394.7738791423
2394.81286549708
2394.64912280702
2394.67446393762
2394.88888888889
2394.71851851852
2394.6007797271
2394.61169590643
2394.69356725146
2394.63547758285
2394.85341130604
2394.71968810916
2394.6873294347
2394.81481481481
2394.738791423
2394.72904483431
2394.76530214425
2394.73918128655
2394.82300194932
2394.80623781676
2394.73996101365
2394.78479532164
2394.62884990253
2394.66900584795
2394.66159844055
2394.71578947368
2394.60311890838
2394.63859649123
2394.61208576998
2394.77894736842
2394.64834307992
2394.75555555556
2394.68070175439
2394.81091617934
2394.69980506823
2394.82884990253
2394.67719298246
2394.61247563353
2394.62105263158
2394.60584795322
2394.64093567251
2394.69122807018
2394.57231968811
2394.68226120858
2394.58401559454
2394.71968810916
2394.69668615984
2394.69707602339
2394.72514619883
2394.81520467836
2394.69512670565
2394.76803118908
2394.64210526316
2394.61364522417
2394.63937621832
2394.62456140351
2394.66549707602
2394.67134502924
2394.68148148148
2394.74035087719
2394.65497076023
2394.67407407407
2394.75516569201
2394.62261208577
2394.73138401559
2394.7298245614
2394.70019493177
2394.73918128655
2394.75048732943
2394.69356725146
2394.66666666667
2394.61910331384
2394.58752436647
2394.6604288499
2394.69083820663
2394.58479532164
2394.67602339181
2394.68070175439
2394.82884990253
2394.72124756335
2394.7656920078
2394.79025341131
2394.69395711501
2394.80467836257
2394.67212475634
2394.58401559454
2394.63274853801
2394.65847953216
2394.64249512671
2394.55282651072
2394.63859649123
2394.75282651072
2394.58323586745
2394.72202729045
2394.70175438596
2394.7567251462
2394.79649122807
2394.73606237817
2394.78869395711
2394.74424951267
2394.76413255361
2394.71228070175
2394.62962962963
2394.67056530214
2394.61988304094
2394.64912280702
2394.62222222222
2394.70253411306
2394.68187134503
2394.73138401559
2394.67134502924
2394.90019493177
2394.70019493177
2394.74035087719
2394.82300194932
2394.7918128655
2394.83235867446
2394.75984405458
2394.58518518519
2394.70604288499
2394.68031189084
2394.71890838207
2394.58089668616
2394.60779727095
2394.73996101365
2394.79961013645
2394.69473684211
2394.78518518519
2394.68771929825
2394.72631578947
2394.7469785575
2394.8089668616
2394.81286549708
2394.66705653021
2394.59142300195
2394.76218323587
2394.66081871345
2394.62339181287
2394.57426900585
2394.75009746589
2394.64912280702
2394.77426900585
2394.80116959064
2394.76842105263
2394.72709551657
2394.69278752437
2394.7656920078
2394.74736842105
2394.86510721248
2394.07134502924
2393.9044834308
2393.96803118908
2394.05769980507
