# Supplementary material for: A miniDOAS instrument optimised for ammonia field measurements
Source: Copernicus journal article supplement (doi:10.5194/amt-9-2721-2016), 2016-06-29
Supplement: Supplementary file 2 [file amt-9-2721-2016-supplement.zip › miniDOAS_Revaluation_basic_20150513/1_Reference_Spectra/miniDOAS-ref_cal_spec-Eval201602170000/miniDOAS_N2calSpec_201410281537-201410281541-Eval201602170000.txt]

reference file calculation performed on: 201602170000
spectrometer: QE65000 serial-QEPB0591, grating-2400
conditions: calibration measurement of N2 (concentration in ppm, temperature in K, pressure in mbar): NA,NA,NA
cuvette length (m): 0.075
accumulation: averaged 4 avg spectra with 855 spectra each
averaging period: 201410281537-201410281541
avg. spectrometer integration time (ms): 70
avg. TEC temperature (deg C): -9.93
avg. DOAS temperature (deg C): 32.12
---
2396.06900584795
2392.75438596491
2392.36695906433
2392.3769005848
2507.71169590643
2507.33742690058
2507.12514619883
2506.9418128655
2507.01052631579
2506.77923976608
2506.45087719298
2505.93713450292
2505.92397660819
2505.86286549708
2505.83830409357
2505.67485380117
2505.46871345029
2505.14590643275
2505.21549707602
2505.23596491228
2504.88888888889
2504.93742690058
2504.62076023392
2504.48187134503
2504.40555555556
2504.73245614035
2504.43538011696
2504.33771929825
2504.22105263158
2503.82777777778
2503.77602339181
2503.66608187134
2503.59269005848
2503.68918128655
2503.57543859649
2503.48684210526
2503.48947368421
2503.48040935672
2503.28538011696
2503.32456140351
2503.47953216374
2503.41432748538
2503.21023391813
2503.03976608187
2502.84912280702
2502.95847953216
2502.99795321637
2502.95847953216
2502.91461988304
2502.86959064327
2502.88421052632
2502.81403508772
2502.72397660819
2502.65760233918
2502.84795321637
2502.88040935673
2502.94532163743
2502.85175438596
2502.81023391813
2502.50877192982
2502.63421052632
2502.79590643275
2502.75233918129
2502.77251461988
2502.71754385965
2502.48771929825
2502.53625730994
2502.37719298246
2502.70087719298
2502.64502923977
2502.5418128655
2502.71432748538
2502.68187134503
2502.88976608187
2502.91812865497
2502.98713450292
2502.88421052632
2502.89356725146
2502.94473684211
2502.93157894737
2502.83538011696
2502.82134502924
2502.72485380117
2502.78040935673
2502.92485380117
2502.82134502924
2502.83333333333
2502.89093567251
2502.81461988304
2502.72777777778
2502.82602339181
2502.81812865497
2502.87573099415
2502.64035087719
2503.01549707602
2502.60789473684
2502.61198830409
2502.78274853801
2502.6485380117
2502.73771929825
2502.69269005848
2502.57076023392
2502.61169590643
2502.56608187134
2502.67573099415
2502.60701754386
2502.67251461988
2502.62631578947
2502.42573099415
2502.43947368421
2502.78625730994
2502.70058479532
2502.63040935673
2502.47076023392
2502.62076023392
2502.59883040936
2502.44356725146
2502.54678362573
2502.56257309942
2502.6634502924
2502.5716374269
2502.70029239766
2502.57046783626
2502.66169590643
2502.55058479532
2502.51315789474
2502.81081871345
2502.59941520468
2502.57748538012
2502.65614035088
2502.86725146199
2502.70584795322
2502.9067251462
2502.87573099415
2502.65730994152
2502.89590643275
2502.96111111111
2502.8350877193
2502.71842105263
2502.74707602339
2502.68450292398
2502.40409356725
2502.51900584795
2502.9769005848
2502.86783625731
2502.92573099415
2502.91432748538
2502.93450292398
2502.91754385965
2503.0432748538
2502.80263157895
2502.98070175439
2503.2418128655
2503.05701754386
2503.1149122807
2503.12660818713
2502.99122807018
2502.92894736842
2502.98713450292
2503.05263157895
2502.96052631579
2502.79444444444
2502.80584795322
2502.92397660819
2502.92456140351
2502.92631578947
2502.86228070175
2503.03304093567
2502.85350877193
2502.83304093567
2503.05087719298
2502.99152046784
2502.9730994152
2502.89122807018
2502.89035087719
2502.84035087719
2502.89649122807
2502.70233918129
2502.9581871345
2503.03362573099
2503.22456140351
2503.16140350877
2503.20438596491
2503.15233918129
2503.18976608187
2503.24649122807
2503.11959064327
2502.90029239766
2502.99941520468
2502.98187134503
2502.89502923977
2502.80555555556
2502.72602339181
2502.79707602339
2502.82865497076
2502.77456140351
2502.82543859649
2502.65116959064
2502.65087719298
2502.56871345029
2502.66783625731
2502.71637426901
2502.91315789474
2503.13187134503
2502.99561403509
2502.95175438596
2503.01871345029
2502.91081871345
2502.75350877193
2502.92192982456
2503.0201754386
2502.86461988304
2502.79269005848
2502.79941520468
2502.69239766082
2502.61637426901
2502.65058479532
2502.71315789474
2502.63976608187
2502.7418128655
2502.77865497076
2502.74035087719
2502.7932748538
2502.6769005848
2502.6298245614
2502.59239766082
2502.71081871345
2502.65438596491
2502.70116959064
2502.62192982456
2502.71842105263
2502.77251461988
2502.73099415205
2502.92543859649
2502.94912280702
2502.84356725146
2502.86432748538
2502.74473684211
2503.02865497076
2502.7567251462
2502.77631578947
2502.89239766082
2502.76608187134
2502.78216374269
2502.78216374269
2502.74619883041
2502.78596491228
2502.66052631579
2502.73450292398
2502.73128654971
2502.94298245614
2502.87865497076
2502.83742690058
2503.04883040936
2503.22397660819
2503.0418128655
2502.9865497076
2502.95087719298
2503.00467836257
2503.0932748538
2503.02192982456
2503.1067251462
2503.06315789474
2503.0514619883
2503.18859649123
2503.33245614035
2503.25292397661
2503.32923976608
2503.31169590643
2503.24619883041
2503.29561403509
2503.31198830409
2503.19298245614
2503.32573099415
2503.55584795322
2503.63157894737
2503.45058479532
2503.54122807018
2503.69619883041
2503.65029239766
2503.73421052632
2503.6298245614
2503.78947368421
2503.82807017544
2503.71081871345
2503.80058479532
2503.74824561404
2503.61257309942
2503.73421052632
2503.77953216374
2503.87339181287
2503.88713450292
2504.10058479532
2503.98128654971
2504.06198830409
2504.15555555556
2504.2350877193
2504.08859649123
2504.27485380117
2504.20935672515
2504.4432748538
2504.49707602339
2504.62602339181
2504.4298245614
2504.49912280702
2504.5230994152
2504.77105263158
2504.65847953216
2504.7269005848
2504.56549707602
2504.73099415205
2504.73801169591
2504.86374269006
2505.05906432749
2505.20847953216
2505.11140350877
2504.92456140351
2504.99269005848
2505.11461988304
2505.1701754386
2505.21228070175
2505.21286549708
2505.29707602339
2505.42660818713
2505.46315789474
2505.64298245614
2505.83128654971
2505.79707602339
2506.00555555556
2506.00175438596
2506.23713450292
2506.13333333333
2506.23888888889
2506.30292397661
2506.28771929825
2506.41695906433
2506.34532163743
2506.36637426901
2506.40204678363
2506.69064327485
2506.72192982456
2506.89093567251
2506.68859649123
2506.67807017544
2507.10584795322
2507.03333333333
2507.1230994152
2507.09707602339
2507.36637426901
2507.36754385965
2507.39093567251
2507.66081871345
2507.72046783626
2507.67251461988
2507.84561403509
2508.05263157895
2507.95029239766
2508.07514619883
2508.53245614035
2508.17280701754
2508.36666666667
2508.54239766082
2508.6701754386
2508.59883040936
2508.92456140351
2508.95906432749
2509.17631578947
2509.12865497076
2509.36783625731
2509.19532163743
2509.36052631579
2509.58362573099
2509.60497076023
2509.52397660819
2509.65233918129
2509.94795321637
2509.94444444444
2509.98567251462
2510.28859649123
2510.13040935673
2510.14093567251
2510.14298245614
2510.20292397661
2510.44385964912
2510.49678362573
2510.56959064327
2510.59385964912
2510.6283625731
2510.70643274854
2510.72251461988
2510.72456140351
2510.82339181287
2511.07105263158
2511.10994152047
2511.25935672515
2511.57280701754
2511.64269005848
2511.90584795322
2512.02368421053
2512.05058479532
2512.17046783626
2512.20935672515
2512.18538011696
2512.35409356725
2512.75233918129
2512.73304093567
2512.81549707602
2512.90497076023
2513.07368421053
2513.23011695906
2513.13830409357
2513.19824561403
2513.24415204678
2513.39883040936
2513.55292397661
2513.60497076023
2513.45760233918
2513.63976608187
2513.8216374269
2513.98801169591
2514.19970760234
2514.20204678363
2514.64795321637
2514.76140350877
2515.22894736842
2515.16666666667
2515.26520467836
2515.44298245614
2515.75789473684
2515.7269005848
2515.89649122807
2515.98713450292
2516.04795321637
2516.40204678363
2516.62953216374
2516.69649122807
2516.82105263158
2516.9581871345
2517.15730994152
2517.29941520468
2517.70204678363
2517.90730994152
2517.94473684211
2518.15263157895
2518.20614035088
2518.26812865497
2518.66812865497
2518.63801169591
2518.81959064327
2519.11111111111
2519.32134502924
2519.47573099415
2520.04269005848
2519.8769005848
2520.20029239766
2520.1798245614
2520.48684210526
2520.80263157895
2521.0230994152
2521.18099415205
2521.3149122807
2521.49532163743
2522.00116959064
2522.24795321637
2522.28099415205
2522.30350877193
2522.43421052632
2522.49005847953
2522.8932748538
2523.05292397661
2523.35994152047
2523.45263157895
2523.77953216374
2523.93567251462
2524.22222222222
2524.30526315789
2524.43450292398
2524.80175438597
2525.08479532164
2525.25438596491
2525.47397660819
2525.58421052632
2525.88070175439
2526.20906432749
2526.35233918129
2526.49122807018
2526.51842105263
2526.84269005848
2527.0985380117
2527.33304093567
2527.85497076023
2527.81257309942
2527.97134502924
2528.27660818713
2528.38567251462
2528.81812865497
2529.09005847953
2529.06023391813
2529.47485380117
2529.53274853801
2529.43304093567
2529.73099415205
2530.0067251462
2530.04502923977
2530.39064327485
2530.81549707602
2530.93976608187
2531.08859649123
2531.31812865497
2531.39064327485
2531.88245614035
2532.10438596491
2532.26374269006
2532.44356725146
2532.67251461988
2533.06900584795
2533.16812865497
2533.50321637427
2533.79736842105
2533.96900584795
2534.34298245614
2534.81403508772
2534.95994152047
2535.2865497076
2535.62953216374
2535.78771929825
2536.16959064328
2536.33187134503
2536.49298245614
2537.04298245614
2537.21608187135
2537.2865497076
2537.66578947368
2538.00643274854
2538.34678362573
2538.47660818713
2539.09444444444
2539.2701754386
2539.53742690058
2540.05643274854
2540.4298245614
2540.58391812865
2541.22865497076
2541.70497076023
2542.04707602339
2542.47368421053
2542.69356725146
2543.12865497076
2543.86695906433
2544.09444444444
2544.44064327485
2544.83567251462
2545.33040935673
2545.48421052632
2545.8730994152
2546.3701754386
2546.85701754386
2547.22631578947
2547.75994152047
2547.94649122807
2548.34824561404
2548.68333333333
2548.94941520468
2549.53976608187
2550.04005847953
2550.44064327485
2551.12134502924
2551.75964912281
2552.31520467836
2552.88771929825
2553.42222222222
2554.01842105263
2554.59269005848
2555.1567251462
2556.09736842105
2556.54590643275
2557.63362573099
2558.64152046784
2559.62134502924
2560.7485380117
2562.13304093567
2563.49941520468
2564.82923976608
2565.51871345029
2567.04766081871
2568.47192982456
2569.25292397661
2569.91871345029
2569.77631578947
2569.63596491228
2569.28947368421
2569.62192982456
2570.93713450292
2572.94707602339
2575.86169590643
2580.01052631579
2585.80321637427
2592.89415204678
2602.35701754386
2611.99005847953
2623.36637426901
2637.03216374269
2650.01169590643
2665.77514619883
2679.23859649123
2684.24210526316
2693.8769005848
2703.8149122807
2716.88421052632
2744.05730994152
2774.28040935673
2801.29561403509
2825.53479532164
2821.9418128655
2789.98859649123
2755.07748538012
2724.26169590643
2711.13011695906
2733.77543859649
2781.00906432749
2836.41842105263
2893.21140350877
2952.9730994152
3010.20116959064
3077.09912280702
3139.5365497076
3206.04005847953
3270.81842105263
3297.70350877193
3297.34912280702
3311.05555555556
3321.43918128655
3368.2432748538
3452.77865497076
3546.01023391813
3657.08333333333
3759.75204678363
3850.2716374269
3950.84766081871
4038.83538011696
4085.76666666667
4055.93099415205
3963.94561403509
3877.51140350877
3822.13684210526
3842.35263157895
3960.68567251462
4112.51871345029
4263.02777777778
4395.63625730994
4527.4932748538
4651.25
4772.80906432749
4869.08596491228
4929.58391812866
4943.61052631579
4945.81812865497
4964.7432748538
5025.46432748538
5134.9514619883
5294.49707602339
5446.93099415205
5584.96023391813
5731.86812865497
5860.67777777778
5976.7947368421
6096.15614035088
6206.92192982456
6300.13040935673
6390.52690058479
6429.43391812866
6381.23450292398
6291.96783625731
6221.2216374269
6194.36081871345
6250.88128654971
6411.10467836257
6593.29736842105
6768.97280701754
6917.32894736842
7055.74678362573
7171.05467836257
7245.53742690059
7277.45789473684
7306.31666666667
7347.70760233918
7411.67397660819
7524.66812865497
7666.34883040936
7806.3067251462
7940.80204678363
8062.63304093567
8167.99385964912
8269.14883040936
8372.68450292398
8479.74415204678
8576.24678362573
8669.29883040936
8752.85350877193
8836.25380116959
8913.7067251462
8986.10058479532
9058.40789473684
9114.53274853801
9158.28742690058
9215.04093567251
9283.54269005848
9358.15789473684
9446.96549707602
9543.02777777778
9629.76286549708
9707.75906432749
9779.65321637427
9833.64356725146
9877.2418128655
9940.39590643275
10012.1289473684
10098.9423976608
10196.7152046784
10290.5485380117
10378.4347953216
10456.7371345029
10536.0014619883
10611.2350877193
10677.4488304094
10745.2555555556
10822.7581871345
10892.7692982456
10962.55
11046.9795321637
11137.6625730994
11236.2105263158
11325.6374269006
11416.6073099415
11510.4485380117
11602.9511695906
11700.8026315789
11812.283625731
11916.6581871345
12004.6774853801
12103.8950292398
12188.7178362573
12283.5912280702
12377.5707602339
12467.6485380117
12569.5473684211
12659.5350877193
12744.8233918129
12852.5763157895
12971.050877193
13083.5918128655
13208.2283625731
13327.9280701754
13441.0269005848
13549.2467836257
13671.2385964912
13795.9804093567
13915.4944444444
14027.6213450292
14157.9356725146
14298.8558479532
14433.9704678363
14575.2365497076
14698.5637426901
14818.9459064327
14955.5704678363
15094.4961988304
15229.2812865497
15369.9801169591
15501.7769005848
15636.601754386
15777.5394736842
15922.3614035088
16072.8675438596
16232.3932748538
16368.8573099415
16533.5678362573
16719.6023391813
16903.4897660819
17087.9347953216
17253.6415204678
17432.3769005848
17618.9371345029
17813.7821637427
17993.6388888889
18179.1160818713
18355.7081871345
18528.7859649123
18720.8152046784
18923.6640350877
19119.2564327485
19312.6789473684
19495.4883040936
19690.7839181287
19888.5321637427
20087.7298245614
20261.0222222222
20452.3312865497
20663.8497076023
20869.1271929825
21065.5979532164
21249.4122807018
21438.917251462
21637.6090643275
21834.0906432749
22022.9760233918
22207.5555555556
22397.4257309942
22592.4684210526
22761.3242690058
22934.7523391813
23103.8429824561
23308.5684210526
23492.8347953216
23660.0152046784
23835.0450292398
24002.8347953216
24178.3535087719
24352.765497076
24513.3751461988
24674.2210526316
24838.5216374269
24978.0687134503
25136.898245614
25313.1494152047
25483.633625731
25645.6280701754
25786.7380116959
25922.8087719298
26035.1561403509
26165.7921052632
26309.5976608187
26448.4137426901
26570.548245614
26683.6692982456
26798.8970760234
26903.5795321637
27023.1932748538
27112.7277777778
27197.9897660819
27282.8064327485
27370.4356725146
27445.3204678363
27493.1950292398
27567.4631578947
27659.918128655
27708.466374269
27768.5111111111
27842.1114035088
27879.9757309942
27921.1792397661
27954.7976608187
27998.9385964912
28042.049122807
28088.7385964912
28118.0897660819
28149.9868421053
28148.9684210526
28130.8453216374
28112.0403508772
28118.3523391813
28101.848245614
28068.1874269006
28067.6415204678
28046.0523391813
28019.6698830409
27981.1789473684
27916.2733918129
27889.1815789474
27855.4266081871
27806.4915204678
27769.6959064327
27699.1824561403
27627.1485380117
27558.2157894737
27490.1652046784
27432.0216374269
27359.3038011696
27257.5830409357
27187.9032163743
27113.5573099415
27007.8599415205
26919.2535087719
26833.4374269006
26721.4573099415
26634.083625731
26533.0198830409
26416.1657894737
26299.1994152047
26215.3219298246
26102.6736842105
25985.564619883
25900.5538011696
25809.0891812866
25692.2271929825
25578.0210526316
25469.1020467836
25381.1140350877
25292.2061403509
25179.465497076
25077.1394736842
24983.7219298246
24894.6786549708
24813.5786549708
24724.4432748538
24645.1067251462
24567.5052631579
24481.2725146199
24387.3418128655
24335.9219298246
24261.8941520468
24180.0964912281
24147.533625731
24093.2002923977
24063.8973684211
24008.065497076
23981.2020467836
23964.2754385965
23963.1830409357
23965.4573099415
23967.1461988304
23946.4277777778
23952.415497076
23984.8137426901
24019.7461988304
24047.6798245614
24080.2883040936
24134.7488304094
24188.4219298246
24283.5552631579
24348.2219298246
24427.0520467836
24518.6283625731
24602.219005848
24709.1157894737
24835.2546783626
24960.7438596491
25085.4795321637
25223.3157894737
25390.0441520468
25549.7947368421
25700.1973684211
25876.6833333333
26054.8312865497
26245.2587719298
26447.9789473684
26657.8005847953
26882.5614035088
27091.2260233918
27334.7657894737
27568.0374269006
27805.7385964912
28077.2254385965
28337.1283625731
28621.0953216374
28897.1666666667
29189.3295321637
29472.6488304094
29762.1561403509
30053.3347953216
30363.2619883041
30684.1847953216
31009.3540935672
31350.7540935673
31660.5239766082
31985.0020467836
32350.865497076
32706.4780701754
33066.8476608187
33418.3356725146
33765.851754386
34148.3576023392
34509.5198830409
34880.0166666667
35264.5087719298
35616.0347953216
35967.3868421053
36338.0540935672
36750.6242690058
37162.2438596491
37544.2
37974.6859649123
38399.7333333333
38787.2733918129
39180.4538011696
39620.5780701754
40023.8944444444
40432.3549707602
40869.0435672515
41309.8964912281
41723.7792397661
42139.1684210526
42570.5909356725
43002.2298245614
43423.0081871345
43827.0578947368
44238.2733918129
44651.7578947368
45068.8175438597
45506.6459064328
45923.9043859649
46313.9502923977
46741.4502923977
47163.1347953216
47576.0137426901
47956.8774853801
48361.9269005848
48791.8616959064
49196.6125730994
49550.5067251462
49790.7102339181
49887.5388888889
49801
49457.7795321637
48903.8459064327
48157.2657894737
47328.419005848
46410.0391812865
45409.6725146199
44230.0558479532
42946.2795321637
41543.4108187134
40029.4842105263
38356.4432748538
36555.9055555556
34776.1631578947
33094.7690058479
31470.7587719298
29925.0780701754
28425.4643274854
26991.8660818713
25627.4701754386
24268.8035087719
22944.3228070175
21659.6096491228
20405.0961988304
19120.7713450292
17884.2488304094
16694.0614035088
15576.4783625731
2404.63801169591
2398.31257309942
2397.6447368421
2397.52748538012
