# Supplementary material for: A miniDOAS instrument optimised for ammonia field measurements
Source: Copernicus journal article supplement (doi:10.5194/amt-9-2721-2016), 2016-06-29
Supplement: Supplementary file 2 [file amt-9-2721-2016-supplement.zip › miniDOAS_Revaluation_basic_20150513/1_Reference_Spectra/miniDOAS-ref_cal_spec-Eval201602170000/miniDOAS_NH3calSpec_201410281529-201410281533-Eval201602170000.txt]

reference file calculation performed on: 201602170000
spectrometer: QE65000 serial-QEPB0591, grating-2400
conditions: calibration measurement of NH3 (concentration in ppm, temperature in K, pressure in mbar): 275.04,293,1000
cuvette length (m): 0.075
accumulation: averaged 4 avg spectra with 855 spectra each
averaging period: 201410281529-201410281533
avg. spectrometer integration time (ms): 70
avg. TEC temperature (deg C): -10
avg. DOAS temperature (deg C): 32.02
---
2396.15317948298
2392.81731602175
2392.46362313494
2392.48143992184
2506.26659869104
2505.91667623108
2505.70834050664
2505.55426709297
2505.60831283817
2505.35049188392
2505.08094291414
2504.48997649888
2504.54632043504
2504.45431252391
2504.29349141936
2504.19879249331
2504.0269077581
2503.71127507242
2503.84014182653
2503.80595077062
2503.56391416626
2503.4995566213
2503.25170963819
2503.12159746133
2503.03480898508
2503.31893479805
2503.05969557851
2502.86473533913
2502.79541420725
2502.61503593485
2502.43704022517
2502.38496953052
2502.10551558999
2502.17628060611
2502.11726444226
2502.15816903044
2501.98338252172
2502.0949940564
2501.98980502268
2501.98655414822
2501.98920588075
2502.08423956113
2501.78719906269
2501.58818043942
2501.51626632781
2501.50310877466
2501.61187318959
2501.50747117014
2501.52646984478
2501.43934388151
2501.37359778925
2501.41335874734
2501.32388267202
2501.29936840739
2501.43118612341
2501.47502356944
2501.57821227524
2501.42532894737
2501.32151923813
2501.0748555091
2501.31341442586
2501.40168777668
2501.38588976335
2501.35370381757
2501.29465212876
2501.070194909
2501.13769948625
2500.9786761491
2501.27330129256
2501.22334843144
2501.2458709078
2501.24090117232
2501.32916290922
2501.47354313549
2501.51158113352
2501.51362006067
2501.50223431437
2501.52532553151
2501.49955388862
2501.56566103733
2501.46040471115
2501.40514975133
2501.32887085315
2501.42064682735
2501.39698242881
2501.39700121605
2501.47061164399
2501.40895604471
2501.40752514073
2501.4457803875
2501.43060611029
2501.33414425862
2501.47853541564
2501.26194423949
2501.5492334809
2501.31806887741
2501.23090841395
2501.33911775154
2501.2476512543
2501.29116077772
2501.25465718424
2501.15229545827
2501.16134783025
2501.10642489206
2501.32394108324
2501.19059203695
2501.2505386812
2501.2698642537
2500.97604696125
2501.04092952397
2501.23387098978
2501.30957773132
2501.2383034104
2501.03249952178
2501.12219660327
2501.18741392031
2500.9813480352
2501.15759584905
2501.1815707493
2501.19937592228
2501.16021957151
2501.19672658086
2501.12044426682
2501.25202082309
2501.1517509701
2501.05348861835
2501.31309333497
2501.21402347379
2501.11664104771
2501.22831167678
2501.30983836148
2501.33060132809
2501.33496099087
2501.4019323523
2501.24119220364
2501.27362921517
2501.44991870252
2501.46801832268
2501.27276295294
2501.28154103132
2501.21020010111
2500.96907450675
2501.12429120894
2501.50689525605
2501.47385056293
2501.43350959174
2501.44929496639
2501.51596163305
2501.50191971361
2501.49698379516
2501.31922685413
2501.47155544625
2501.72115442422
2501.59722734601
2501.50051545335
2501.71939559764
2501.59425998798
2501.49285641089
2501.55921735804
2501.48965711592
2501.47214570695
2501.35288161994
2501.35521055364
2501.47442750178
2501.44897797453
2501.44020604471
2501.38881818058
2501.56476642346
2501.34143677925
2501.31808049134
2501.54084446904
2501.51039856261
2501.33559394983
2501.50777518172
2501.40545478767
2501.36862600426
2501.38588942176
2501.22683602503
2501.44934005575
2501.61122725037
2501.6831358966
2501.65130929934
2501.59019818823
2501.66529895611
2501.73140747117
2501.6489591873
2501.63816438487
2501.39874193857
2501.48524006668
2501.42298908291
2501.38646465268
2501.37297097885
2501.27538189321
2501.24469482702
2501.27273528447
2501.31892455047
2501.3025813658
2501.16348547576
2501.10321364158
2501.04504187845
2501.14382378259
2501.12428881784
2501.38766361972
2501.56597632125
2501.43703373504
2501.48350241843
2501.36832233426
2501.42681313877
2501.29612573099
2501.26397735968
2501.50511695906
2501.36573447833
2501.24848609062
2501.28915361808
2501.10872035033
2501.07838750888
2501.17339044652
2501.15522216757
2501.15785477127
2501.27186868066
2501.21282997213
2501.22101369077
2501.21483269115
2501.23445373559
2500.97956324807
2500.9789846013
2501.13565065311
2501.16138096409
2501.17541775974
2501.08305118325
2501.23037451495
2501.32740954801
2501.13041857955
2501.27509564409
2501.28358200798
2501.24295956987
2501.18590479314
2501.19148835875
2501.39701897852
2501.2052214844
2501.18680179811
2501.32564969667
2501.27329104498
2501.2201460622
2501.20288127835
2501.2458268432
2501.19759865005
2501.13912902388
2501.20027839263
2501.14208920861
2501.2818426518
2501.25869097393
2501.16487983003
2501.42828639941
2501.55423635022
2501.41686649451
2501.45108521889
2501.40607784063
2501.40397332896
2501.40196787725
2501.45165191015
2501.53962261573
2501.49515972564
2501.3869906952
2501.53639360278
2501.68640385036
2501.64955115593
2501.70917261026
2501.71852182052
2501.69895303875
2501.70535811882
2501.78402811936
2501.63993175111
2501.62968416954
2501.9394740258
2501.99214898617
2501.76442210472
2501.82377268131
2502.05847919058
2501.94828182216
2502.07165177351
2501.9588019894
2502.11816144723
2502.21251912882
2502.10499706236
2502.13539924578
2502.20314361644
2502.044137017
2502.11016867519
2502.08655790567
2502.16692012352
2502.24439867191
2502.33355092365
2502.20821241187
2502.35139777013
2502.47384748866
2502.51621201563
2502.47209276111
2502.5545161092
2502.44082021643
2502.59458654424
2502.7778604416
2502.86763335519
2502.67441008089
2502.72791816965
2502.8497844592
2502.93985626059
2502.8228814833
2502.91348786686
2502.82405175712
2502.95441670766
2502.97138601957
2503.14561437667
2503.25256394491
2503.35226608187
2503.33091558725
2503.17685583702
2503.27098670547
2503.35721088157
2503.37156774335
2503.38705354703
2503.4715175302
2503.58642434552
2503.63058663989
2503.7606827622
2503.78404895611
2503.97199199322
2503.87023384981
2504.0769224463
2504.22077799639
2504.31487914685
2504.21398043395
2504.31571979013
2504.41040676067
2504.47123742963
2504.45108385254
2504.44873169099
2504.55421175603
2504.46513123736
2504.72410026234
2504.84218109526
2504.86847502323
2504.68285989506
2504.76734300705
2505.01754181013
2505.07365824999
2505.19761026398
2505.0526377275
2505.37802542767
2505.27480119692
2505.39616433022
2505.64311601629
2505.76909568508
2505.76819731377
2505.85385514019
2506.0318966224
2505.81880909439
2506.08594988249
2506.56387215117
2506.19793169645
2506.41479545827
2506.42769511395
2506.62848383615
2506.53962944745
2506.84626236541
2506.91707452041
2507.01579801334
2507.10352721758
2507.29233890802
2507.10289152593
2507.31480980489
2507.58376919714
2507.52355543258
2507.43149833306
2507.60509817183
2507.84045574411
2507.80036447232
2507.85594291414
2508.09912007433
2508.00992409958
2507.97516088703
2507.99094865278
2508.18853261464
2508.24027572826
2508.33236357053
2508.46280162048
2508.44259475597
2508.50896390119
2508.42094537356
2508.62383689949
2508.61740995792
2508.65891334645
2508.96053246434
2508.96407607805
2509.12515405531
2509.37186116577
2509.46479989889
2509.50339468219
2509.65481909603
2509.7991600399
2509.87959843144
2509.9199575067
2509.95035319998
2510.10964160791
2510.33675431765
2510.39024191124
2510.49609942887
2510.50543360933
2510.80654068973
2510.80241774608
2510.80449698038
2510.89390815434
2510.93571384653
2511.06230529595
2511.18273453298
2511.35077403399
2511.00265412363
2511.21605625239
2511.43354272558
2511.54516860688
2511.83107237525
2511.79366357873
2512.0900567716
2512.34470951522
2512.72411665847
2512.75101451058
2512.87666728152
2512.96879816363
2513.15786023665
2513.28501940209
2513.35250997431
2513.4080843171
2513.50016259496
2513.8535757228
2514.01439375307
2514.01345097557
2514.26896485763
2514.36482859212
2514.54198946549
2514.75566008089
2514.99650454993
2515.25373626824
2515.29641471279
2515.49344667159
2515.57061813412
2515.62063008963
2515.87169822922
2515.9608395502
2516.14354948899
2516.33442026015
2516.54870948789
2516.76474012133
2517.12134673717
2517.13768513964
2517.48910374652
2517.38826310324
2517.65598253812
2517.94188357381
2518.10818166913
2518.36600159862
2518.31190803137
2518.60048129475
2519.06522039132
2519.26895153577
2519.25753709625
2519.33824090015
2519.49516724053
2519.59809668252
2519.98366398863
2520.12192026015
2520.41332868776
2520.45050520577
2520.68401308958
2520.88251181888
2521.1087456277
2521.14180022681
2521.39352352845
2521.65449937148
2521.86528153522
2521.99474094114
2522.20899908455
2522.39638704432
2522.77348301634
2522.857935044
2523.19442668197
2523.23856813959
2523.40251339017
2523.59866166585
2523.82586592064
2524.04885124611
2524.43763321856
2524.49609259715
2524.59342822594
2524.83781767503
2524.89449909821
2525.2435050828
2525.63256408154
2525.49986063289
2525.90883546483
2525.99473923321
2526.06260110947
2526.31276916981
2526.31513362846
2526.46304414658
2526.78576201017
2527.07569649396
2527.25871044434
2527.47361076953
2527.54927822867
2527.5647753047
2528.04887993933
2528.32215390501
2528.43762297098
2528.52943310379
2528.7313698967
2529.11228514237
2529.23915498442
2529.48085171066
2529.75129222004
2529.86704958463
2530.29120484232
2530.56772660819
2530.80740797672
2531.05324950812
2531.53030073236
2531.45749303164
2531.92462083948
2531.96643165546
2532.19443385528
2532.61973171831
2532.6185344592
2532.80443617806
2533.10904144122
2533.40402080942
2533.6735035115
2533.91319376127
2534.321566377
2534.50720404984
2534.80303772476
2535.18421018473
2535.54551053451
2535.71535770891
2536.18887556703
2536.63697224955
2536.89009502924
2537.24559695579
2537.52473117178
2537.94271362792
2538.53117143521
2538.58876386839
2538.99041885282
2539.28500539706
2539.73866378368
2539.83197040498
2540.30901821337
2540.69194096027
2541.0149122807
2541.28272838443
2541.74895406351
2541.81293449746
2542.24181047439
2542.48466073673
2542.71211878997
2543.25847338361
2543.50835826912
2543.92311444499
2544.55368229764
2544.95040307154
2545.43995976116
2546.05119486801
2546.47592159917
2546.96059019238
2547.35433745969
2547.81438179756
2548.49458551948
2548.85860967645
2549.56681184074
2550.34851956605
2551.14149109144
2552.08804585451
2553.02287055255
2554.17597044597
2555.27537642783
2555.74983911297
2556.98805131989
2558.05029649669
2558.6197419659
2559.08569540089
2558.90792855386
2558.69809429141
2558.42388403837
2558.52002240804
2559.43853876319
2560.7656593294
2562.8582803875
2565.48529062141
2568.83780230366
2572.45605427119
2576.79249672077
2580.54721948953
2584.03012686506
2587.99564682735
2591.00648706072
2595.15819020878
2599.00734000109
2601.11109949719
2605.85445667323
2611.60948379516
2620.37569341969
2635.65131305679
2653.76323133574
2673.09182516259
2691.83663749522
2696.00759721539
2684.6695899601
2670.70000341586
2658.93182454774
2657.97689956004
2679.75269374761
2717.13505697655
2761.23647011805
2807.20426436028
2856.86962104443
2904.71818501667
2960.13841066842
3011.94379201508
3066.47253921408
3118.12580614308
3136.77142325245
3133.0410757228
3139.79813186588
3141.77709767995
3171.03081721047
3225.15802727223
3279.74465759414
3337.22439368476
3374.99478808001
3386.75379467946
3386.55259707876
3362.52661331093
3307.99480857518
3229.15037779417
3138.76509878669
3066.1319577663
3024.17058295076
3027.71722345193
3081.41076235175
3161.92139421763
3258.54436417172
3365.13804346341
3487.74574315462
3619.56725180357
3761.95803991091
3898.05680029513
4013.63933158441
4102.01342023282
4181.00126899218
4271.57603432257
4386.12719024977
4531.25417042411
4708.4318279636
4874.49027675302
5026.10967508335
5181.56426702465
5315.29759284309
5434.46646649724
5549.66482244357
5650.84665792206
5732.02789835765
5804.06693583648
5826.82781706017
5769.59185897961
5676.17489171722
5594.93662451495
5544.63670307974
5552.7931132836
5623.83589898617
5677.29214454555
5676.16213279499
5595.04525195387
5448.56609690113
5246.89590643275
5014.73391027218
4788.3187964557
4613.73687421435
4512.90106164945
4495.75173252446
4564.3993902689
4703.81086038695
4896.48203325682
5131.40929216538
5393.70452362409
5671.35341449418
5959.64769907635
6253.839635596
6546.95911249112
6824.11948748429
7085.69240654206
7325.28625013663
7547.10313507679
7745.15428553861
7923.0576901268
8085.01878586654
8217.01626291195
8327.45278905012
8437.39418620539
8546.41554489807
8648.05370450074
8752.07846607367
8854.24352660272
8937.32930193474
9003.7876591791
9058.0337456277
9089.25561499153
9107.35345036072
9140.92203503307
9178.11921216593
9221.36173894628
9258.91563746789
9264.00564368476
9217.78508976881
9085.45875006832
8847.83280831557
8491.7418323359
8051.92560289938
7618.56576863693
7263.37999432967
7011.54692914139
6884.56644873477
6877.678286741
6963.97979142756
7142.28662929715
7409.34316691261
7757.57798751161
8153.96542329344
8570.02210539979
8991.27975658578
9408.8952464885
9797.56429469312
10144.6678451385
10468.2847744849
10748.4068269388
11009.4724398125
11245.6488280183
11453.0166519785
11655.2834672351
11829.5935194294
11985.2667708504
12148.7836592064
12310.1128327048
12455.7037806744
12601.5851099224
12733.3872410778
12851.9734908728
12954.0192961961
13065.2953496475
13172.05329084
13270.4036740996
13359.6720032656
13462.7801507761
13575.9397472946
13676.0440526452
13770.5162150899
13830.2254724135
13853.4110769525
13828.459356042
13683.0822819315
13331.3888280866
12797.0966005356
12257.472844592
11891.8117874515
11702.445959037
11649.2115244302
11715.3409165437
11806.8344626168
11897.3752227141
12152.2093457944
12607.1383836831
13174.5185583702
13789.6397753047
14380.213160969
14943.8342395611
15484.9387918785
15991.0130861617
16437.1849422036
16848.0716640706
17212.7408885336
17540.9041902361
17855.3043026179
18155.3058752801
18427.8790901514
18682.968863065
18913.8238915533
19145.1176695633
19368.1179076488
19585.1238205034
19770.5610185413
19965.3762109226
20177.0884608816
20377.9341743182
20564.0287109909
20736.5416212357
20911.9234413428
21093.6248483358
21273.8847410095
21441.4223342624
21603.8711253894
21763.3983590206
21917.9190591354
22026.8651233809
22098.4692767257
22078.1201921763
21937.6439033721
21613.5758508909
21230.5310300186
20992.9243199022
20958.0649409739
21068.762353118
21204.5685334344
21265.7767929852
21253.8247058944
21271.942594756
21434.0398238099
21820.3600053971
22351.391030975
22904.6836479341
23432.6258823168
23915.9457571596
24350.583978931
24718.8171182434
25067.3070448707
25386.2951655326
25670.2589574111
25906.5752845412
26110.1481407471
26290.1135049462
26443.9982886539
26599.8440546948
26715.9068330874
26820.7578335929
26916.9425438596
27016.4362292999
27092.2536710253
27141.5073693775
27215.0348158168
27305.6029243182
27356.5022930672
27413.2380161365
27489.3544566732
27524.1244753238
27560.3857575695
27587.8294341285
27622.9006394491
27654.9119316008
27683.7933821118
27691.163557892
27683.9472095835
27623.0170745204
27517.8743533776
27386.9118540608
27268.0790317402
27139.2747701126
27036.7795820353
27013.2709371755
26986.8082226595
26931.3435532464
26821.7659889599
26671.0042114144
26578.7392120293
26525.5210915724
26523.3003053779
26577.083621632
26608.4861913838
26639.5220828551
26674.884248784
26713.7686195141
26761.7032761518
26783.4940143876
26759.1678195196
26752.2440519621
26729.7995788244
26662.7020997295
26607.7127835164
26543.710878491
26449.6500573865
26377.2470087309
26287.7294020195
26179.8144132235
26067.4457769716
25988.89013397
25881.4664828934
25766.8762126305
25683.1573215554
25592.0411409657
25478.6062168662
25364.0284923758
25256.8493902689
25168.6264551566
25080.1948321446
24966.2018356834
24864.2179445401
24768.8198888479
24679.8313999563
24599.2433845029
24508.2809183199
24426.9678082473
24346.7784090288
24256.5790365224
24156.6742341641
24095.3743079467
24012.2395850413
23912.7149245778
23862.0550623053
23789.7652747035
23749.7371310871
23688.6825391458
23662.828512871
23648.5810074739
23641.1083862792
23633.0537980953
23621.4077622015
23592.6108111986
23596.4260257829
23637.2502555064
23685.2875321091
23725.5459914877
23771.740169495
23835.5846853309
23898.5994883041
24001.6289651309
24074.3759946986
24155.7384373121
24250.3461960977
24337.8577352162
24445.6423761409
24572.0538090261
24696.1209443488
24818.7476140214
24954.8597420342
25118.9473663715
25277.2217347789
25426.6185911625
25599.3924198639
25773.7189570011
25962.9010503771
26162.4226987348
26368.4561038012
26590.5633789009
26795.1267400394
27035.0494353583
27263.7988570531
27496.3006845384
27763.753209201
28020.0716989124
28301.7901442176
28574.7417045827
28865.0440304421
29143.8173874132
29430.450980352
29716.6571873121
30021.9442330027
30341.961696248
30665.9561034596
31006.0212920834
31314.715008608
31637.7571483713
32004.2048331011
32357.7002688282
32716.421288326
33066.6465937039
33414.9097994207
33793.154158127
34153.7482531289
34523.6270204815
34905.2977865224
35252.0556102093
35601.9393848718
35967.4532348199
36374.1056505165
36785.7505554189
37167.5697597284
37596.4512597694
38022.3169385692
38409.4472963464
38798.1117601246
39235.4691995272
39637.8399471225
40041.7036085151
40478.3275205635
40918.9183452205
41332.4831755206
41746.7291236268
42175.5992406542
42604.4319072116
43026.1575370962
43429.0668965541
43835.5019419167
44248.8043791332
44665.6551381374
45103.557137099
45519.5730085533
45909.8681255807
46336.7085068591
46755.5848031781
47169.2405865716
47544.6608316937
47951.0869965022
48378.0478217057
48781.0517349156
49153.0508389353
49427.2041871618
49566.2653150107
49518.3383607968
49232.5192422255
48758.2042062906
48084.0491173416
47315.0159735886
46449.973215896
45482.3664244822
44330.5542431819
43076.0448707438
41705.3524560037
40211.9124651582
38566.6256968355
36816.8434278843
35097.0650441329
33472.4977537301
31897.0346416079
30392.1099910504
28934.454286905
27541.0968348636
26214.7914234574
24884.9357985599
23574.698285238
22290.5066704924
21025.7415867355
19727.5337538258
18473.3039282396
17256.4678178117
16110.2765388452
2404.86175909985
2398.40019811991
2397.75417452315
2397.59455955894
