# Supplementary material for: A miniDOAS instrument optimised for ammonia field measurements
Source: Copernicus journal article supplement (doi:10.5194/amt-9-2721-2016), 2016-06-29
Supplement: Supplementary file 2 [file amt-9-2721-2016-supplement.zip › miniDOAS_Revaluation_basic_20150513/1_Reference_Spectra/miniDOAS-ref_cal_spec-Eval201602170000/miniDOAS_NOcalSpec_201410281521-201410281525-Eval201602170000.txt]

reference file calculation performed on: 201602170000
spectrometer: QE65000 serial-QEPB0591, grating-2400
conditions: calibration measurement of NO (concentration in ppm, temperature in K, pressure in mbar): 482.35,293,1000
cuvette length (m): 0.075
accumulation: averaged 4 avg spectra with 856 spectra each
averaging period: 201410281521-201410281525
avg. spectrometer integration time (ms): 70
avg. TEC temperature (deg C): -9.95
avg. DOAS temperature (deg C): 31.77
---
2396.17240838662
2392.81561321528
2392.49970316172
2392.47634004208
2508.01086551074
2507.66573106247
2507.31217959228
2507.21017516533
2507.26663489916
2507.0780735913
2506.76072272777
2506.1348059108
2506.18148911024
2506.18153351642
2506.049779677
2505.83643664262
2505.63246980379
2505.4059903946
2505.53076870525
2505.53836557906
2505.20286522381
2505.13737361316
2504.79990298956
2504.74793067169
2504.69702239438
2504.84195769798
2504.6520351697
2504.52169686287
2504.47847871236
2504.18825490518
2504.10031186807
2503.99918429251
2503.78324417937
2503.84258075094
2503.76218710718
2503.76129795868
2503.69558090124
2503.66142366235
2503.53276903318
2503.54274197956
2503.6800476171
2503.7020204815
2503.47877486746
2503.28382726677
2503.01587247909
2503.15909267913
2503.32064136197
2503.14240688364
2503.19966217139
2503.06263253539
2503.01645078428
2503.1304001339
2502.9983419413
2503.04423778488
2503.09980051375
2503.17364185386
2503.15352995027
2503.03283632563
2503.01439375307
2502.81448393179
2503.04656706017
2503.10177180685
2502.91827861125
2502.99515357709
2502.91064347981
2502.69617150352
2502.72425192655
2502.60794392523
2502.9144518227
2502.87088935345
2502.81335328196
2502.91563063617
2502.91128190414
2503.10561840739
2503.15695161775
2503.29025864896
2503.13187271137
2503.14679831393
2503.02783448106
2503.16874077718
2503.09560242116
2503.03223786686
2502.97141744548
2503.04649703503
2503.06933172105
2503.08514783844
2503.04473240149
2503.09357100891
2503.04741453517
2502.98607729409
2503.05065857791
2503.05709098486
2503.12399061322
2502.93811485489
2503.21072580204
2502.94281166311
2502.86536214953
2502.97528556594
2502.92789562497
2502.99425418101
2502.95189272832
2502.781480229
2502.96968867847
2502.82270078428
2502.86682277149
2502.76805794666
2502.89021185167
2502.90452703995
2502.60935740832
2502.64762836804
2502.95217112095
2502.90654683828
2502.8238758403
2502.67366713122
2502.8224333224
2502.75550431765
2502.71485967645
2502.85369835219
2502.9042343007
2502.94544392523
2502.85427563262
2502.87737436465
2502.85251578128
2502.83091558725
2502.75491576488
2502.78238474887
2503.03659206427
2502.98371215227
2502.8440143876
2502.94777764114
2503.13829247964
2502.99362566268
2503.06372595234
2503.04889599388
2502.85246249385
2503.02405858884
2503.07837008799
2503.06845008745
2503.00474941247
2503.01992813029
2502.86887536208
2502.71601697
2502.83203701426
2503.20518117724
2503.10968396458
2503.10939054217
2503.16140794939
2503.08920485599
2503.1049813494
2503.20911624857
2502.99483214461
2503.22771458436
2503.3457803875
2503.29257391922
2503.20436410341
2503.41558554681
2503.27917383997
2503.15382098158
2503.22153631743
2503.19151192818
2503.18414323386
2503.02844421217
2503.0342819178
2503.15347973712
2503.11694779199
2503.14383505493
2503.04072423075
2503.1386388479
2503.09072354758
2503.1192985872
2503.08571316336
2503.21805726349
2503.16929995354
2503.13477038586
2503.13711878997
2503.12078482811
2502.9954080587
2502.95359860906
2503.22711817511
2503.29493017981
2503.38550684538
2503.36358351096
2503.37176688801
2503.42053102968
2503.46709638192
2503.31891498606
2503.34864458654
2503.11728015522
2503.23560829644
2503.17630178445
2503.16516095535
2502.98927829699
2502.98112532109
2502.95159042466
2503.0696415396
2503.00533045035
2503.03074035361
2502.92352195715
2502.75898712904
2502.73238782314
2502.84344428048
2502.92730878013
2503.09122841176
2503.35686587965
2503.18794645297
2503.13129850522
2503.17745600372
2503.11667793901
2503.0742799366
2503.0719510029
2503.21982155545
2503.04014216811
2503.06816486309
2502.99072798819
2502.93636286003
2502.83621324534
2502.82238515877
2502.92410982675
2502.7706847434
2502.9749436383
2503.01471552714
2502.92262631852
2502.96994623436
2503.00765426026
2502.73501837733
2502.86004912007
2502.80659431874
2502.82417882713
2502.88525407171
2502.84609498825
2502.8571756982
2503.03397107449
2502.89866542329
2503.07666762311
2503.01649484888
2502.94488064983
2502.98867676395
2502.95156207302
2503.19439252336
2502.97407361863
2502.88819649396
2503.13743919768
2503.03341394764
2503.05088812374
2503.0511706154
2502.95158290977
2502.97698017435
2502.85601533038
2502.92557523091
2502.97843669727
2503.11290102203
2503.0874559354
2503.12426729792
2503.12102496311
2503.39406528393
2503.25105413456
2503.23186690441
2503.12045178171
2503.19819471771
2503.28116221238
2503.25521943488
2503.28651110838
2503.31890883751
2503.25607920697
2503.4252695114
2503.53986070121
2503.51555309614
2503.56464140296
2503.54217221402
2503.50798184129
2503.49302378805
2503.46294986883
2503.48254836858
2503.47001147729
2503.69202123299
2503.82653986992
2503.6722276876
2503.68216750014
2503.79636381647
2503.80665990326
2504.00417623108
2503.80977380172
2504.07227243537
2503.94920205498
2503.9404560857
2503.9726317839
2503.97874241679
2503.97318412855
2503.85951863693
2503.95276718861
2504.10528911843
2504.10473028365
2504.27564354812
2504.02316090069
2504.16870149478
2504.33090089905
2504.41908475433
2504.36154936602
2504.42965001093
2504.39396451604
2504.54622308302
2504.72860134175
2504.79257426081
2504.67865018856
2504.63775072416
2504.73300404438
2504.89193378696
2504.75812496584
2504.85047138875
2504.72975419468
2504.96001701099
2504.94866508171
2505.06236199923
2505.3022408045
2505.33583510958
2505.33294016779
2505.21953803902
2505.19206393125
2505.32419898071
2505.41794488167
2505.35691438487
2505.4781569383
2505.59940666503
2505.62716155654
2505.81653378969
2505.84518295349
2505.92612211018
2505.93955737279
2506.08570394054
2506.23560863803
2506.28529369569
2506.22805172979
2506.41966818331
2506.40946979013
2506.4419156829
2506.5032597557
2506.56286686342
2506.64823331694
2506.44951153195
2506.86097994207
2506.9159312319
2506.82971764497
2506.870341791
2506.89868762639
2507.12894463573
2507.22012898289
2507.33465151391
2507.27128286058
2507.48779342242
2507.55767202274
2507.58015692463
2507.78411351588
2507.82471716675
2507.83029150954
2507.99330252227
2508.13273999836
2508.14150441329
2508.36912096245
2508.55997670383
2508.26978090671
2508.51555787834
2508.6278040799
2508.79051073947
2508.83907129584
2509.01903146691
2509.04561881729
2509.31509946986
2509.33144128819
2509.43523425971
2509.4024197956
2509.68386757392
2509.88724244412
2509.8483959119
2509.64032833251
2509.8389964885
2510.07462972072
2510.13948700607
2510.10382337268
2510.43757309942
2510.21575121605
2510.28206673225
2510.37792090233
2510.50944075532
2510.61229163251
2510.63391573755
2510.75136292835
2510.69352591955
2510.73558745969
2510.83938760453
2510.82760425206
2510.95594428048
2510.93109901896
2511.17891423457
2511.3995200716
2511.42903959666
2511.76098677379
2511.79113652511
2512.03750853965
2512.0625710499
2512.18473588566
2512.20518151883
2512.31101888288
2512.36707861945
2512.55205190742
2512.77621946221
2512.96176798109
2512.89926729792
2512.89075053287
2513.22503484178
2513.2594998497
2513.32881141717
2513.29985755862
2513.38403085205
2513.61719646663
2513.61168565885
2513.83637003334
2513.61082656993
2513.67659076625
2514.01909910095
2514.15754222004
2514.3790532601
2514.45041468547
2514.67454739848
2514.9436594797
2515.32529649669
2515.21660005739
2515.46819184839
2515.58975856698
2515.87116877084
2515.91237668743
2515.9322074657
2516.06175568399
2516.13393725747
2516.50385684812
2516.73151643712
2516.76305644368
2517.0225412636
2517.05239622616
2517.36534165437
2517.48723356288
2517.87092931901
2518.01839850795
2518.05115729355
2518.31564498278
2518.47607907034
2518.47724046292
2518.90244336503
2518.73706242827
2519.0076043887
2519.25045157676
2519.51614028256
2519.65023398645
2520.11842446849
2520.0467624474
2520.36971771329
2520.3831212084
2520.50178239602
2520.93256852216
2521.10872615729
2521.28673689676
2521.43724654315
2521.60929387331
2521.95650448161
2522.22825907253
2522.36033468601
2522.29347399847
2522.49978616713
2522.71543695688
2522.93598745696
2523.27410811882
2523.45148043395
2523.50266744548
2523.80419262721
2523.96466702192
2524.26801968902
2524.28088006231
2524.48187783516
2524.8697026835
2525.1429319014
2525.27918408756
2525.41291536864
2525.6601929278
2526.06781883642
2526.16313569164
2526.46206037875
2526.71977954036
2526.67798443734
2526.90832411051
2527.12479812264
2527.32641826529
2527.81887365415
2527.87493509865
2527.90299331858
2528.27533612068
2528.45128743783
2528.9570482866
2529.00065823632
2528.88840998524
2529.40007002514
2529.5155124474
2529.44917370334
2529.82995060666
2530.00500013663
2530.06813104607
2530.39977796907
2530.6823888479
2531.01221955785
2531.05875963273
2531.24461387113
2531.38487627753
2531.77942934634
2532.05352824233
2532.23377773679
2532.31938295895
2532.66340930207
2533.08999870197
2533.15691506804
2533.52890432858
2533.76862156364
2533.99324001202
2534.40792172214
2534.68703988359
2534.97280360168
2535.26155483139
2535.73118441548
2535.73995224627
2536.17483911297
2536.25810276275
2536.52719537356
2536.91494643931
2537.02102223042
2537.19695168607
2537.612509906
2537.89047248183
2538.18734252883
2538.41935938952
2538.95264934142
2539.13295588075
2539.41288018528
2539.87726881456
2540.42279813631
2540.58532819588
2541.12824540908
2541.58296886102
2541.90092740613
2542.23411180795
2542.6703271028
2543.05693146417
2543.55407102257
2543.76826494781
2544.24424803246
2544.50232688419
2545.21268343171
2545.32517045144
2545.7024857217
2546.22998169099
2546.59291311417
2546.89560754495
2547.40994698584
2547.68051729792
2548.10367888178
2548.42985701208
2548.71327403399
2549.31940277095
2549.69900735093
2550.27465021588
2550.82612279335
2551.40942026015
2551.96696999508
2552.59604648303
2553.08526875991
2553.71766409794
2554.1417001421
2554.72988058152
2555.54356007815
2556.00608672187
2556.80300766519
2557.72873558507
2558.6840810652
2559.90522319233
2561.295959037
2562.66330101929
2563.98558438542
2564.7719264087
2566.36517598513
2567.64102721758
2568.35232380991
2569.0490374105
2569.01597427174
2568.83715021588
2568.63323734765
2568.91986357053
2570.20767099798
2572.01588409302
2574.98583135213
2578.85367819861
2584.53838641581
2591.3574353036
2600.30865237471
2609.75624658414
2620.57821022572
2633.95773726567
2646.4094680822
2661.72290778543
2674.68336715035
2679.50684777559
2688.96388547303
2698.81279615511
2710.96849415205
2737.24947361589
2766.15114465486
2791.49820667323
2813.41009215992
2809.1847423758
2778.51108139312
2744.69539132098
2715.46675787014
2702.86978466415
2723.79324411106
2766.9171506941
2815.80120921463
2862.30608159808
2906.71088429797
2948.64987224682
3004.25893281686
3063.35425103842
3131.75796339564
3200.70221860141
3231.33058732306
3236.60539159425
3256.38677652074
3276.99299987703
3336.55349579166
3430.22707820954
3528.39020570312
3640.54603281959
3742.04647073291
3832.07289992895
3931.50899464393
4019.02455696289
4065.67285893862
4036.54294556485
3945.90382371427
3860.4364714844
3805.8915679483
3826.130872889
3943.86125047822
4094.26236678144
4243.83908188501
4375.61554250697
4507.17172897196
4629.25032177406
4748.12623790785
4838.7394665109
4894.14016266328
4905.59507467071
4904.66009591736
4922.06959576707
4983.46344721812
5093.91754317648
5254.21424038094
5409.3764964885
5550.42337029294
5700.53733228125
5831.57698529814
5950.23955873914
6070.97757282615
6182.98470992512
6277.27182939826
6368.22921858775
6408.32307584577
6361.50387700169
6273.7899074985
6203.43031166311
6177.18219585178
6233.95604948899
6393.37109703777
6575.52691834727
6751.09794638465
6897.95669986883
7035.51298710171
7151.23810324097
7224.63497192163
7256.65863973602
7285.71709125813
7326.82265296223
7390.51332629666
7503.31817476909
7644.10461995136
7783.87501981199
7919.25721190632
8041.63809401815
8147.80974954911
8248.43317654534
8353.25273200525
8459.76183459037
8553.39916789638
8639.1937011532
8716.83133198065
8795.58062865497
8867.16185303602
8937.00701071214
9009.7152870006
9065.71207096792
9111.91194355632
9171.18238577362
9242.55050144832
9318.13670752036
9406.43307919331
9499.98967795267
9584.19187025195
9659.0571169454
9726.36288086845
9775.16838381975
9813.25475385309
9868.64912861398
9931.98698591299
10006.3638280866
10083.9325463191
10144.3929629857
10182.3495497896
10183.1754915423
10143.7859570558
10043.7275574548
9856.45493318577
9576.55618783134
9242.91790218342
9002.12104340876
8998.23313418866
9221.26702123299
9565.01086619391
9901.59098076187
10085.5120603788
10195.5143469558
10370.0889531071
10665.5320824452
11064.8376523474
11485.8174810078
11789.0247660136
11962.4799403591
12084.4018288517
12176.8928024403
12275.9469537356
12370.888186588
12459.2758040936
12558.7436280538
12645.7724486938
12730.5998367219
12837.4676494097
12958.1383587473
13071.8428143958
13198.2314221594
13320.122389941
13437.7265931573
13549.1042933951
13672.7310146472
13801.5474538176
13922.0038732442
14036.3075791113
14166.5855345139
14310.4090175302
14447.3665621413
14589.2317080669
14712.7455556239
14834.2136405558
14970.3651151828
15109.6098550992
15243.2530080068
15384.1903607832
15514.6456003716
15649.2522353391
15789.8822238618
15935.4949609226
16087.4645864076
16247.3445595589
16386.8808523938
16552.3104313549
16740.1384034951
16925.8321237771
17112.7793600044
17280.6785600098
17461.2758122916
17650.1813005547
17847.9800380527
18030.0958565612
18218.3277248319
18395.6918391676
18570.6236247746
18763.3779598431
18967.0731274253
19164.824936465
19360.5006206619
19544.5681406105
19739.1104286222
19936.2246068345
20133.6052289993
20307.4123804449
20498.1147759879
20712.5064593923
20918.9281938296
21113.5924854484
21298.6631151965
21490.8569608406
21691.5620330519
21888.8212466525
22079.2500843718
22266.2009714707
22455.5518390993
22649.8354060775
22820.5279854621
22991.8854866918
23160.2241839509
23363.3552672569
23547.7242772039
23714.2218290567
23886.1583681751
24054.0848954064
24228.644514128
24400.2655285019
24557.4215755998
24715.7749685741
24875.2995982948
25011.628052413
25167.4353442504
25336.5771537001
25496.9616918074
25646.1532279882
25770.8511221102
25885.8056843335
25972.6906234629
26075.5761111794
26187.2520177488
26288.3018510548
26361.2199325709
26407.88711879
26422.8873742963
26385.4283871673
26293.2452020823
26074.0766420042
25717.9218194923
25190.5848479259
24443.5830737279
23392.3496976963
22093.2684839045
21044.2534076625
20732.0129823195
21186.3643425152
22198.7791154288
23393.0514380773
24140.9913708531
24252.0634520003
24166.6204131825
24408.3610885664
25068.0894617287
26036.1869483385
27048.0964874706
27764.5410183363
28095.6305880062
28174.5126045253
28176.7300769935
28189.3494674673
28175.4593447696
28145.2182881757
28144.7934500874
28124.7133211729
28097.6698427338
28058.7619073482
27992.513718779
27965.1099661147
27929.8192596464
27881.3240958217
27843.8471433158
27774.8222539897
27703.6664005711
27635.7840089905
27567.0020853829
27512.583850153
27440.5057803192
27340.3720572362
27271.5230884844
27199.1840199213
27094.4072013172
27006.594613188
26920.4598253812
26809.040292466
26722.6306201153
26622.9027658223
26504.2045041537
26386.9633054599
26304.4364735339
26192.0018230448
26073.9187086681
25988.9790266164
25895.9574079767
25781.1414606903
25666.6376140897
25557.7878050363
25470.351077704
25379.2489940291
25267.1030148385
25165.5928963765
25070.1499672077
24979.9868964174
24898.5614045335
24807.972953558
24728.5042606028
24650.2921756299
24562.0189798874
24465.3518968273
24413.5645980215
24338.7556897989
24253.6973848172
24220.2867327977
24163.935213423
24133.1236439034
24075.6555531645
24048.1194089195
24031.3295540253
24027.8769214215
24031.5057888588
24034.1951481117
24013.0209358091
24019.4781979286
24051.7009140843
24087.6902781194
24115.140600235
24149.5387696754
24203.5596245286
24259.055878696
24355.7854057359
24421.2979443351
24501.5669686287
24592.8434610182
24680.9911197874
24788.2490787424
24916.7111121359
25043.933024198
25170.5707107039
25309.0511504618
25476.2430801498
25639.1727943789
25791.5502216893
25969.6782693201
26147.5094960923
26341.9462497267
26546.3615094004
26756.7928806635
26983.2756346669
27191.1931221648
27434.6497110182
27669.1265692463
27906.6775967372
28176.6253661802
28436.6624053807
28719.4416612013
28992.367285279
29283.4962497267
29561.1907010029
29845.8103876319
30127.4761473875
30426.2586708204
30730.4699643384
31036.4688876592
31350.9328339345
31629.21976007
31916.1657163743
32237.6849941247
32536.0058732306
32823.3499467126
33076.6909923758
33288.3338675739
33478.3104962562
33572.5731315243
33572.7439580259
33455.1676893753
33138.61336148
32592.3385179264
31867.6850026644
31322.9996676368
31330.8301804941
31984.6308349729
33201.9427149943
34655.3205245395
35845.6625843718
36469.0718707302
36660.0872543996
36853.1460259879
37408.3633160491
38360.077669495
39581.0498575586
40836.799283694
41856.191090411
42613.1895150161
43159.0534093704
43615.1290539433
44033.2314392387
44452.419891239
44872.6827013991
45298.0649081817
45739.0540501858
46160.159134011
46551.9927553014
46982.7746778844
47406.9894166393
47826.9329268459
48206.2593150516
48616.2783424195
49049.9918378013
49457.1047644423
49815.0066684429
50051.2797183281
50148.4763660026
50068.891374269
49728.4488136716
49175.0187804012
48425.1387952943
47597.2780729081
46686.7952888452
45691.8127011942
44523.0074950812
43240.8468775619
41834.6996816418
40311.9726252938
38614.1141761628
36775.5981448462
34955.2685194294
33235.2215212876
31575.4491053861
29996.9515712958
28466.7271765863
27005.8377309122
25621.2280934033
24246.2644009264
22904.8439033721
21605.09658209
20337.0547890365
19052.5694847516
17820.305291168
16634.7243533776
15519.7491914658
2404.71125218615
2398.32437148166
2397.70572429907
2397.57334023337
