# Supplementary material for: A miniDOAS instrument optimised for ammonia field measurements
Source: Copernicus journal article supplement (doi:10.5194/amt-9-2721-2016), 2016-06-29
Supplement: Supplementary file 2 [file amt-9-2721-2016-supplement.zip › miniDOAS_Revaluation_basic_20150513/1_Reference_Spectra/miniDOAS-ref_cal_spec-Eval201602170000/miniDOAS_refdarkLampSpec_201505181200-201505181659-Eval201602170000.txt]

reference file calculation performed on: 201602170000
spectrometer: QE65000 serial-QEPB0591, grating-2400
conditions: dark measurement reference spectrum
cuvette length (m): 0.075
accumulation: averaged 4 avg spectra with 598 spectra each
averaging period: 201505071123-201505071127
avg. spectrometer integration time (ms): 100
avg. TEC temperature (deg C): -9.95
avg. DOAS temperature (deg C): 30.9
---
2397.13503344482
2394.22491638796
2393.89673913043
2393.97115384615
2394.18227424749
2393.6902173913
2393.72408026756
2393.89506688963
2394.1906354515
2394.10284280936
2394.04347826087
2393.75710702341
2394.0622909699
2394.0631270903
2394.01505016722
2393.94105351171
2393.90886287625
2393.73871237458
2393.92182274247
2394.07357859532
2393.86036789298
2394.07357859532
2393.98202341137
2394.02006688963
2393.99540133779
2394.22575250836
2394.16178929766
2394.15802675585
2394.17140468227
2394.04222408027
2394.13461538462
2394.18311036789
2394.16220735786
2394.1856187291
2394.08068561873
2394.14339464883
2394.19774247492
2394.23704013378
2394.11914715719
2394.3131270903
2394.30351170569
2394.53219063545
2394.33277591973
2394.3097826087
2394.38670568562
2394.23662207358
2394.41931438127
2394.3766722408
2394.375
2394.27466555184
2394.27424749164
2394.38168896321
2394.42433110368
2394.40342809365
2394.34531772575
2394.45610367893
2394.49372909699
2394.40175585284
2394.47617056856
2394.50543478261
2394.42851170569
2394.64464882943
2394.58110367893
2394.54682274247
2394.59113712375
2394.47867892977
2394.53637123746
2394.45526755853
2394.59280936455
2394.61204013378
2394.61454849498
2394.72742474916
2394.66513377926
2394.90677257525
2394.72408026756
2394.90384615385
2394.78971571906
2394.83235785953
2394.76546822742
2394.84615384615
2394.91178929766
2394.84489966555
2394.57190635451
2394.7504180602
2394.72658862876
2394.74456521739
2394.85075250836
2394.71321070234
2394.83904682274
2394.79222408027
2394.8775083612
2394.77759197324
2394.92182274247
2394.72575250836
2395.26839464883
2395.1868729097
2394.87918060201
2394.90468227425
2394.69523411371
2394.75543478261
2394.83779264214
2394.81939799331
2394.82817725753
2394.79473244147
2395.05434782609
2394.9347826087
2394.89799331104
2395.04682274247
2394.86914715719
2395.02801003344
2395.20108695652
2395.15133779264
2394.99122073579
2394.90426421405
2395.08403010033
2395.06814381271
2394.96279264214
2395.23244147157
2395.03344481605
2395.08152173913
2395.02633779264
2395.16973244147
2395.12876254181
2395.25794314381
2395.21488294314
2395.12876254181
2395.46404682274
2395.17516722408
2394.9364548495
2395.16931438127
2395.23076923077
2395.07023411371
2395.02466555184
2395.1245819398
2394.89423076923
2395.05058528428
2395.27717391304
2395.15928093645
2395.14882943144
2395.22533444816
2395.11831103679
2395.34322742475
2395.20735785953
2395.28260869565
2395.14423076923
2395.17391304348
2395.25459866221
2395.15091973244
2395.16847826087
2395.24038461538
2394.9983277592
2395.24331103679
2395.38336120401
2395.33904682274
2395.27257525084
2395.37876254181
2395.3143812709
2395.28553511706
2395.25752508361
2395.30142140468
2395.24372909699
2395.22867892977
2395.09866220736
2395.24623745819
2395.26045150502
2395.20777591973
2395.23285953177
2395.43060200669
2395.28219063545
2395.2470735786
2395.45819397993
2395.44941471572
2395.36496655518
2395.46321070234
2395.33737458194
2395.26964882943
2395.29473244147
2395.10409698997
2395.30852842809
2395.35576923077
2395.53595317726
2395.36580267559
2395.32734113712
2395.39715719064
2395.42307692308
2395.4381270903
2395.46780936455
2395.4389632107
2395.60367892977
2395.64715719064
2395.54180602007
2395.37959866221
2395.35953177258
2395.33193979933
2395.3152173913
2395.26964882943
2395.42558528428
2395.38503344482
2395.44523411371
2395.33444816053
2395.42851170569
2395.5593645485
2395.52424749164
2395.6872909699
2395.47198996656
2395.47533444816
2395.5643812709
2395.43394648829
2395.36204013378
2395.45526755853
2395.72909698997
2395.51463210702
2395.52759197324
2395.41471571906
2395.48411371237
2395.54891304348
2395.55602006689
2395.58904682274
2395.42725752508
2395.60869565217
2395.49623745819
2395.53511705686
2395.60576923077
2395.54724080268
2395.41680602007
2395.43060200669
2395.46906354515
2395.58361204013
2395.55392976589
2395.47491638796
2395.59949832776
2395.82901337793
2395.4402173913
2395.71321070234
2395.7525083612
2395.83653846154
2395.63921404682
2395.58695652174
2395.6889632107
2395.5606187291
2395.54933110368
2395.71362876254
2395.47240802676
2395.52968227425
2395.5025083612
2395.58193979933
2395.52341137124
2395.51170568562
2395.61120401338
2395.79306020067
2395.78762541806
2395.61496655518
2395.56897993311
2395.67140468227
2395.86622073579
2395.64757525084
2395.51254180602
2395.61663879599
2395.6237458194
2395.54724080268
2395.64339464883
2395.70944816054
2395.66931438127
2395.54807692308
2395.73285953177
2395.8156354515
2395.71153846154
2395.69230769231
2395.72240802676
2395.6224916388
2395.76797658863
2395.84991638796
2395.70903010033
2395.60911371237
2395.74581939799
2395.84322742475
2395.60158862876
2395.59322742475
2395.69523411371
2395.58570234114
2395.86287625418
2395.65677257525
2395.94356187291
2395.8762541806
2395.75877926421
2395.80769230769
2395.86538461538
2395.73118729097
2395.72533444816
2395.64715719064
2395.80267558528
2395.73369565217
2395.86789297659
2395.64548494983
2395.82148829431
2395.8131270903
2396.00543478261
2395.83737458194
2395.94188963211
2395.80392976589
2395.92683946488
2396.03260869565
2395.98076923077
2395.82734113712
2395.83152173913
2395.78511705686
2396.08152173913
2395.75794314381
2395.8143812709
2395.65635451505
2395.85284280936
2395.7483277592
2395.86705685619
2395.875
2396.03511705686
2395.96362876254
2395.81730769231
2395.97449832776
2395.98996655518
2395.92056856187
2395.91596989967
2395.8118729097
2395.80100334448
2395.94356187291
2395.90886287625
2395.90301003344
2395.90593645485
2395.83235785953
2395.92140468227
2395.97533444816
2395.97491638796
2395.88336120401
2396.01086956522
2396.00877926421
2395.94816053512
2395.83653846154
2395.85994983278
2395.77717391304
2395.66764214047
2395.90133779264
2395.86287625418
2395.84615384615
2395.79264214047
2395.82399665552
2395.97282608696
2395.95819397993
2396.07566889632
2395.81814381271
2395.95234113712
2395.8745819398
2395.85869565217
2395.92683946488
2395.93185618729
2395.83779264214
2395.84364548495
2395.96028428094
2395.62081939799
2395.78971571906
2396.1856187291
2395.66220735786
2395.88837792642
2395.92349498328
2395.93269230769
2395.71948160535
2395.98327759197
2395.88168896321
2395.97324414716
2395.77048494983
2395.91262541806
2395.76881270903
2395.76379598662
2395.94899665552
2395.93269230769
2395.76045150502
2395.91304347826
2395.9974916388
2395.87040133779
2395.90886287625
2396.0602006689
2395.89255852843
2395.92934782609
2395.91178929766
2396.01964882943
2395.91555183947
2395.92642140468
2395.91262541806
2395.80518394649
2395.85660535117
2395.92433110368
2395.75794314381
2395.80142140468
2395.88921404682
2396.05602006689
2395.91638795987
2395.92474916388
2395.97240802676
2395.97533444816
2396.01379598662
2395.96530100334
2396.0016722408
2395.94356187291
2395.83026755853
2395.8152173913
2395.73035117057
2395.78260869565
2395.84448160535
2395.86454849498
2395.80267558528
2395.93352842809
2396.03762541806
2396.13712374582
2396.125
2395.92433110368
2396.0004180602
2396.07734113712
2396.14046822742
2395.78344481605
2395.79765886288
2395.98076923077
2395.90677257525
2395.90133779264
2395.72867892977
2395.81688963211
2395.82357859532
2396.1860367893
2395.94481605351
2395.88628762542
2395.87165551839
2395.95735785953
2395.95484949833
2395.90342809365
2395.8741638796
2395.89841137124
2395.91095317726
2395.91555183947
2395.747909699
2395.89464882943
2395.84949832776
2395.88963210702
2395.9381270903
2396.01964882943
2396.20066889632
2395.92725752508
2395.98829431438
2396.08612040134
2395.84280936455
2396.11413043478
2395.9356187291
2395.90259197324
2395.78219063545
2395.84489966555
2395.84071906355
2396.32483277592
2395.97115384615
2396.05602006689
2395.8147993311
2395.86287625418
2396.1262541806
2396.02968227425
2396.0618729097
2395.97366220736
2395.95025083612
2396.21488294314
2396.3093645485
2396.05602006689
2395.83235785953
2395.90802675585
2395.89632107023
2396.0652173913
2396.0618729097
2396.1254180602
2395.96446488294
2396.10409698997
2395.97115384615
2396.14339464883
2395.85953177258
2395.95317725753
2396.14339464883
2396.13921404682
2395.9397993311
2395.90551839465
2395.86204013378
2395.97658862876
2395.92767558528
2395.94397993311
2396.127090301
2396.01546822742
2395.99289297659
2396.01086956522
2395.93185618729
2396.31772575251
2396.17391304348
2396.1220735786
2396.13085284281
2396.07023411371
2396.17433110368
2396.16011705686
2395.88670568562
2396.19690635451
2396.17307692308
2395.90719063545
2396.0008361204
2396.15050167224
2395.90468227425
2396.10827759197
2396.24498327759
2396.05685618729
2395.98118729097
2396.10869565217
2395.98285953177
2396.10953177258
2396.16178929766
2396.15342809365
2395.89590301003
2395.8720735786
2396.1860367893
2396.03637123746
2395.96237458194
2396.0597826087
2396.05225752508
2396.13586956522
2396.1852006689
2396.07232441472
2395.9995819398
2396.17098662207
2396.10200668896
2396.14046822742
2395.98327759197
2395.83486622074
2396.14214046823
2396.07065217391
2395.95025083612
2395.97784280936
2396.05852842809
2395.95568561873
2395.89924749164
2396.10911371237
2395.97240802676
2395.99456521739
2396.18060200669
2396.22909698997
2396.05267558528
2396.14799331104
2396.09657190635
2396.13043478261
2395.95861204013
2396.08193979933
2395.96446488294
2396.21362876254
2395.89757525084
2396.04222408027
2395.97115384615
2396.21112040134
2395.88921404682
2395.97324414716
2395.98494983278
2396.06856187291
2396.08361204013
2396.15175585284
2395.98285953177
2395.97658862876
2396.02926421405
2395.89214046823
2395.99665551839
2396.04556856187
2395.91806020067
2396.0631270903
2396.02090301003
2396.08068561873
2396.03469899666
2396.15468227425
2396.21906354515
2395.94732441472
2395.95275919732
2396.16764214047
2396.06688963211
2396.01964882943
2395.99498327759
2396.00543478261
2395.90969899666
2395.97408026756
2395.94899665552
2395.9987458194
2396.00543478261
2396.23662207358
2396.05309364549
2396.0012541806
2396.18227424749
2396.13921404682
2396.26086956522
2396.12040133779
2396.13001672241
2396.2483277592
2395.94397993311
2396.05183946488
2395.89046822742
2395.96571906355
2395.99331103679
2396.12123745819
2395.93311036789
2395.97073578595
2396.07023411371
2396.13377926421
2396.17851170569
2396.24331103679
2396.1275083612
2396.15384615385
2396.06897993311
2396.01337792642
2395.94105351171
2396.15050167224
2396.08152173913
2396.19690635451
2395.89506688963
2396.08152173913
2396.002090301
2396.08235785953
2395.94690635452
2396.00919732441
2396.12165551839
2396.10994983278
2396.08904682274
2396.19732441472
2396.10535117057
2396.18185618729
2396.08988294314
2396.11036789298
2395.97366220736
2395.93018394649
2395.96112040134
2395.97157190635
2396.06856187291
2396.10785953177
2396.05476588629
2396.15886287625
2396.05058528428
2396.86538461538
2396.3110367893
2396.13043478261
2396.19607023411
2396.07107023411
2396.10660535117
2396.1889632107
2396.07357859532
2396.10827759197
2396.03971571906
2396.18352842809
2396.16638795987
2396.19774247492
2396.32065217391
2396.26170568562
2396.21237458194
2396.30100334448
2396.27382943144
2396.10117056856
2396.19690635451
2396.20234113712
2396.08904682274
2396.17725752508
2396.19105351171
2396.09573578595
2395.92391304348
2396.13127090301
2395.9389632107
2396.51463210702
2396.19690635451
2396.3156354515
2396.34364548495
2396.1258361204
2396.08026755853
2396.25
2396.17725752508
2396.17642140468
2396.21321070234
2396.13586956522
2396.02884615385
2396
2396.11245819398
2396.23954849498
2395.98494983278
2396.09573578595
2396.17642140468
2396.04933110368
2396.11078595318
2396.15301003344
2396.21571906355
2396.09782608696
2396.23996655518
2395.98871237458
2396.00376254181
2396.07107023411
2396.09155518395
2395.99372909699
2395.97324414716
2395.97282608696
2396.16847826087
2396.24623745819
2396.19356187291
2396.13545150502
2396.2487458194
2396.18311036789
2396.46613712375
2396.26839464883
2396.11956521739
2396.15259197324
2396.04724080268
2395.98536789298
2396.15217391304
2396.13754180602
2396.0025083612
2396.10326086957
2395.9974916388
2396.03260869565
2396.06605351171
2396.24163879599
2396.19188963211
2396.04138795987
2396.22867892977
2396.20819397993
2396.07817725753
2396.32734113712
2396.10827759197
2396.04013377926
2396.04933110368
2396.11747491639
2396.02842809365
2396.20317725753
2396.08152173913
2396.13461538462
2396.20484949833
2396.41346153846
2396.25668896321
2396.15342809365
2396.14632107023
2396.20526755853
2396.14841137124
2396.09280936455
2396.125
2396.33361204013
2395.99331103679
2396.13461538462
2396.07859531773
2396.20108695652
2396.08026755853
2396.125
2396.1885451505
2396.15635451505
2396.35493311037
2396.17851170569
2396.05727424749
2396.13503344482
2396.05852842809
2396.3152173913
2396.16722408027
2396.15886287625
2396.14966555184
2396.09866220736
2396.10158862876
2396.17307692308
2396.05392976589
2396.16095317726
2396.26505016722
2396.33904682274
2396.26505016722
2396.21404682274
2396.00836120401
2396.23285953177
2396.1860367893
2396.10576923077
2396.02842809365
2396.01421404682
2396.15635451505
2396.0012541806
2396.17934782609
2396.3127090301
2396.04724080268
2396.03177257525
2396.13001672241
2396.28469899666
2396.10576923077
2396.47240802676
2396.1852006689
2396.31981605351
2396.16555183947
2396.11078595318
2396.16429765886
2396.07148829431
2396.08444816054
2396.17224080268
2396.02341137124
2396.16931438127
2396.29222408027
2396.10827759197
2396.1258361204
2396.20066889632
2396.22867892977
2396.1847826087
2396.63294314381
2396.30016722408
2396.19147157191
2396.06981605351
2396.14005016722
2396.08570234114
2396.14757525084
2396.07274247492
2396.122909699
2396.28093645485
2396.15635451505
2396.21697324415
2396.15593645485
2396.28302675585
2396.17892976589
2396.45610367893
2396.16638795987
2396.2495819398
2396.26546822742
2396.00334448161
2396.08444816053
2396.10660535117
2396.20568561873
2396.08277591973
2396.14130434783
2396.40217391304
2396.3720735786
2396.39966555184
2396.27006688963
2396.14966555184
2396.27299331104
2396.27550167224
2396.17851170569
2396.22993311037
2396.25585284281
2396.11956521739
2396.06605351171
2396.19983277592
2396.17182274247
2396.1237458194
2396.16555183947
2396.25752508361
2396.01421404682
2396.20819397993
2396.16304347826
2396.29640468227
2396.25501672241
2396.1893812709
2396.07190635451
2396.15510033445
2396.1860367893
2396.10451505017
2396.18143812709
2396.16931438127
2396.22867892977
2396.30142140468
2396.07692307692
2396.30434782609
2396.08988294314
2396.38754180602
2396.19439799331
2396.25877926421
2396.19188963211
2396.26839464883
2396.28887959866
2396.45777591973
2396.27466555184
2396.1885451505
2396.17433110368
2396.27173913043
2396.05769230769
2396.10953177258
2396.07023411371
2396.10284280936
2396.26003344482
2396.36663879599
2396.29682274247
2396.20066889632
2396.4364548495
2396.35409698997
2396.22909698997
2396.23871237458
2396.29055183946
2396.30602006689
2396.32274247492
2396.21780936455
2396.40008361204
2396.37165551839
2396.17892976589
2396.13754180602
2396.11831103679
2396.28595317726
2396.21446488294
2396.11078595318
2396.41806020067
2396.53553511706
2396.2525083612
2396.29347826087
2397.07859531773
2396.37081939799
2396.26421404682
2396.16137123746
2396.27717391304
2396.33486622074
2396.46362876254
2396.3106187291
2396.35493311037
2396.42934782609
2396.36538461538
2396.25919732441
2396.44230769231
2396.34030100334
2396.44732441472
2396.4352006689
2396.34866220736
2396.42015050167
2396.22240802676
2396.28804347826
2396.24540133779
2396.29055183947
2396.22031772575
2396.22157190635
2396.25710702341
2396.33653846154
2396.17015050167
2396.33026755853
2396.37123745819
2396.40468227425
2396.22993311037
2396.50418060201
2396.27341137124
2396.18227424749
2396.16513377926
2396.22366220736
2396.20568561873
2396.25543478261
2396.15175585284
2396.24163879599
2396.1868729097
2396.375
2396.27090301003
2396.2483277592
2396.3143812709
2396.50961538462
2396.33486622074
2396.3762541806
2396.11872909699
2396.17015050167
2396.30894648829
2396.2504180602
2396.26421404682
2396.26295986622
2396.3102006689
2396.35827759197
2396.29222408027
2396.25459866221
2396.39715719064
2396.22867892977
2396.3118729097
2396.30267558528
2396.27048494983
2396.26505016722
2396.38712374582
2396.27884615385
2396.28469899666
2396.2470735786
2396.18352842809
2396.26463210702
2396.38127090301
2396.13127090301
2396.24038461538
2396.22826086957
2396.45986622074
2396.22408026756
2396.35033444816
2396.35911371237
2396.25376254181
2396.40384615385
2396.23620401338
2396.14255852843
2396.24540133779
2396.31981605351
2396.21195652174
2396.12918060201
2396.19690635452
2396.26546822742
2396.22867892977
2396.25710702341
2396.3114548495
2396.30894648829
2396.34197324415
2396.29013377926
2396.36496655518
2396.38586956522
2396.32441471572
2396.377090301
2396.14715719064
2396.3127090301
2396.07525083612
2396.27090301003
2396.16429765886
2396.3093645485
2396.27968227425
2396.27842809365
2396.1902173913
2396.53678929766
2396.27090301003
2396.35535117057
2396.42642140468
2396.41346153846
2396.36998327759
2396.34573578595
2396.15635451505
2396.25752508361
2396.34197324415
2396.26505016722
2396.10158862876
2396.16513377926
2396.25877926421
2396.41387959866
2396.24331103679
2396.31814381271
2396.19816053512
2396.30685618729
2396.26546822742
2396.40928093645
2396.3775083612
2396.27132107023
2396.11538461538
2396.39799331104
2396.24038461538
2396.21404682274
2396.14590301003
2396.30309364548
2396.2474916388
2396.41638795987
2396.38712374582
2396.41011705686
2396.18018394649
2396.20108695652
2396.30560200669
2396.33737458194
2396.41011705686
2395.43269230769
2395.25752508361
2395.44983277592
2395.46362876254
