# Supplementary material for: A miniDOAS instrument optimised for ammonia field measurements
Source: Copernicus journal article supplement (doi:10.5194/amt-9-2721-2016), 2016-06-29
Supplement: Supplementary file 2 [file amt-9-2721-2016-supplement.zip › miniDOAS_Revaluation_basic_20150513/1_Reference_Spectra/miniDOAS-ref_cal_spec-Eval201602170000/miniDOAS_refLampSpec_201505181200-201505181659-Eval201602170000.txt]

reference file calculation performed on: 201602170000
spectrometer: QE65000 serial-QEPB0591, grating-2400
conditions: reference measurement
cuvette length (m): 0.075
accumulation: averaged 299 avg spectra with 598 spectra each
averaging period: 201505181200-201505181659
avg. spectrometer integration time (ms): 100
avg. TEC temperature (deg C): -7.82
avg. DOAS temperature (deg C): 29.86
---
2398.02899296428
2395.21785550497
2394.85953736535
2394.81281529289
2521.12436102504
2520.70120021029
2520.61168219595
2520.59821478507
2520.55732598069
2520.17392422904
2519.85349716446
2519.34752407691
2519.5201004463
2519.43413384638
2519.21717877876
2518.9918960638
2518.76979004709
2518.5358385253
2518.62424357669
2518.6199539155
2518.25043344034
2518.20874486863
2517.89572264292
2517.76487958748
2517.70641267995
2517.98790841266
2517.6378340287
2517.50051453563
2517.4092683527
2517.09689488932
2517.00560955694
2516.83700965314
2516.70706703504
2516.79729533227
2516.63052985984
2516.6749533003
2516.63318642968
2516.66357199584
2516.37015245914
2516.42352434537
2516.57476426438
2516.66544557667
2516.28164114495
2516.02836657308
2515.84665160345
2515.89971588685
2516.04272882854
2515.92426259214
2515.8998053713
2515.78112101654
2515.8047616917
2515.81167995884
2515.73741345175
2515.72857126878
2515.82766971287
2515.8695372535
2515.91430744623
2515.76730685339
2515.66169841501
2515.44627017595
2515.48690730529
2515.69088712654
2515.57798011208
2515.54664936634
2515.54118522164
2515.24719522153
2515.2619713426
2515.06511112851
2515.34792116419
2515.37965458999
2515.32633303878
2515.47397680115
2515.41961499312
2515.66905851165
2515.62357803604
2515.74255321529
2515.62411494279
2515.61328173063
2515.5393675686
2515.58996543663
2515.56215254863
2515.54032393374
2515.39281439805
2515.47536940303
2515.51854565385
2515.54551403228
2515.60202906008
2515.56607308643
2515.53474793347
2515.42660596638
2515.52526258096
2515.41981074037
2515.61481415197
2515.35992885986
2515.79457164909
2515.54136419056
2515.44960906478
2515.62548517354
2515.46977662442
2515.52958579882
2515.49711412624
2515.43863044038
2515.46251719779
2515.44464827015
2515.53255556426
2515.43135423541
2515.45836176329
2515.54289661189
2515.22477377211
2515.33433071218
2515.73937092426
2515.76457198465
2515.61195064932
2515.46403843357
2515.6159830427
2515.64255433384
2515.49388150021
2515.7062169327
2515.65564702856
2515.71082538227
2515.53909911522
2515.61379626626
2515.5882204897
2515.66958423284
2515.61171575262
2515.51511728057
2515.93920649657
2515.7096397132
2515.54579926399
2515.83690339034
2515.96557085491
2515.88677978994
2515.96883703762
2516.03464167067
2515.81355913245
2515.94539770249
2516.02662162616
2516.09009407054
2515.87792082863
2515.97154394246
2515.85646133712
2515.70600999989
2515.80467780002
2516.1945839532
2516.12787329001
2516.15890761848
2516.26344783615
2516.18181563965
2516.19475732934
2516.31254124674
2516.04204091677
2516.2895493339
2516.55747698572
2516.30536011901
2516.29425286071
2516.43219874498
2516.27909643069
2516.17127325198
2516.18502030179
2516.25430364314
2516.16720730193
2516.08901466427
2515.96797015693
2516.0946521851
2516.08506056979
2515.97898233801
2515.89327300589
2516.05718616123
2515.83500184562
2515.76053959128
2515.95156094451
2515.91889911746
2515.76344224338
2515.69973490229
2515.62503775126
2515.48672833637
2515.44405543562
2515.20604914934
2515.47906622968
2515.60904240445
2515.68156955739
2515.56813682174
2515.44402747173
2515.47544770193
2515.41247860762
2515.31291596291
2515.27695998926
2515.07011107258
2515.04834957103
2515.08738716569
2515.02584422993
2514.9039104708
2514.81576268722
2514.72838111431
2514.76065703963
2514.69932662946
2514.7524580262
2514.58772273241
2514.5344794801
2514.38022505341
2514.5403854543
2514.54957438955
2514.76154069865
2515.04394246149
2514.74084182504
2514.73103768414
2514.77503607342
2514.63797944095
2514.56095010123
2514.56497130905
2514.78179774275
2514.51431751323
2514.48623057908
2514.40907819823
2514.29803357904
2514.26633930269
2514.17088175747
2514.28289952014
2514.12535094686
2514.28207738168
2514.23799510073
2514.29422489681
2514.3179886131
2514.20903010033
2513.92722117202
2514.07905951835
2514.07506068165
2514.14197827765
2514.11741479402
2513.98449122493
2514.12809700115
2514.27554501627
2513.99592845718
2514.28054496035
2514.23634523104
2514.21928166352
2514.07608975291
2513.99035804969
2514.25471191597
2513.98119148555
2513.93992796501
2514.14979138936
2513.93701412736
2513.9899106274
2513.92549859621
2514.00803682285
2513.94137090189
2513.80975045022
2513.77623292804
2513.95698593975
2514.01773470095
2513.85882708247
2513.86418496437
2514.0306092773
2514.21432646167
2514.0701334437
2513.96781915191
2513.94147157191
2513.89318911422
2513.95589534793
2513.99760629076
2514.0696356864
2514.02899296428
2513.96827775976
2514.10995402736
2514.22198297558
2514.13408686704
2514.18675406315
2514.07420498652
2513.98443529714
2514.02898177873
2514.10528405723
2513.97241082315
2513.93585642219
2514.1900090603
2514.25839755707
2514.05051397635
2514.00643169539
2514.22515967383
2514.10938356394
2514.28318475185
2514.09390275277
2514.30950996074
2514.32978378318
2514.17593203655
2514.27670831422
2514.25910783996
2514.19091509044
2514.16970168119
2514.19082560598
2514.35459334907
2514.31354794689
2514.47003948502
2514.30464424335
2514.36834039888
2514.42810483104
2514.61440028635
2514.47548685138
2514.59714656436
2514.40632095838
2514.63305779577
2514.90266887395
2514.87844654981
2514.69996420622
2514.64092124249
2514.70866097695
2514.94481605351
2514.65940537578
2514.69701681189
2514.50339481661
2514.71705014485
2514.65844341786
2514.78216686614
2514.85971633427
2515.06926656301
2514.92061610049
2514.73986308878
2514.84337423519
2514.87700920571
2514.8181731748
2514.89740606928
2514.82534870975
2514.93613046834
2515.11214639657
2515.20863301305
2515.17332020895
2515.29465554077
2515.15795125334
2515.33681390588
2515.43294817731
2515.60643616962
2515.45410006599
2515.66060782318
2515.71443831724
2515.68573058467
2515.64611134104
2515.65799599557
2515.7409816445
2515.60903681167
2515.89943624792
2516.04220870013
2516.02699634232
2515.96231585776
2515.97385376003
2516.27432579054
2516.25656312569
2516.33345264594
2516.21777161329
2516.5076061789
2516.44252860706
2516.49054820416
2516.70785002405
2516.7417925974
2516.70566324761
2516.85266943323
2517.00998310981
2516.78573505889
2517.07407075983
2517.51164416505
2517.04989317793
2517.26973971208
2517.41539244527
2517.61750427848
2517.47252267872
2517.78242972674
2517.83381617655
2517.92578382792
2517.88303822105
2518.19410297424
2518.00419458395
2518.17419827519
2518.47930671916
2518.42996722632
2518.29478976745
2518.49157168264
2518.71042829499
2518.69527186497
2518.72083645597
2518.93135423541
2518.87406181139
2518.84063377367
2518.9039887697
2518.99181217212
2519.02277938726
2519.16119506493
2519.26235165155
2519.23365510453
2519.3620093735
2519.36867037281
2519.34602521225
2519.40861959039
2519.57139181888
2519.78616011007
2519.89392176821
2519.95597923961
2520.35546022975
2520.36505743784
2520.6311171016
2520.73675350388
2520.86291540363
2520.89689153365
2521.03922215635
2521.08096106308
2521.22666972405
2521.43984407333
2521.59192290914
2521.65234728918
2521.72502544714
2521.91959821478
2522.04261138019
2522.11313631839
2522.08558629098
2522.09572599859
2522.37307748235
2522.42181854789
2522.69753134752
2522.37190299885
2522.51451326048
2522.86528674176
2522.97982684757
2523.20794510129
2523.18390733884
2523.5619512086
2523.68175971186
2524.22265410901
2524.1589803246
2524.2013791792
2524.39595753962
2524.59060860617
2524.66945559893
2524.61654791333
2524.74694913927
2524.8310589367
2525.14542902205
2525.31455464704
2525.22238565564
2525.49889262984
2525.67015469626
2525.81907920493
2525.93931835214
2526.25103186765
2526.55029585799
2526.41118667576
2526.56326551157
2526.71655798034
2526.67793425129
2526.99981543831
2526.93937987271
2527.13063052986
2527.34521985213
2527.63396941869
2527.75492444156
2528.38030894509
2528.12499860181
2528.48135926891
2528.43590675719
2528.55529020928
2528.94051520677
2529.15065267726
2529.33225019854
2529.28575743001
2529.55721412512
2530.03237100256
2530.35193677923
2530.28919698885
2530.24178700462
2530.37448686256
2530.52039686357
2530.88368698337
2531.14431046633
2531.34317848794
2531.39150568786
2531.69262648069
2531.79552242145
2532.10715763806
2532.05140882093
2532.24192682408
2532.68205053635
2532.88210422702
2532.98319929307
2533.14420420353
2533.36839632666
2533.69675954408
2533.84087426315
2534.06029015335
2534.28689276406
2534.24789991163
2534.50491045961
2534.84578472277
2534.99520139596
2535.67122291697
2535.58129662979
2535.72556794667
2535.93321103791
2535.97041420118
2536.29318463999
2536.39399447433
2536.19221261507
2536.56351718661
2536.51397076095
2536.32509703471
2536.54228140625
2536.68363888547
2536.56640306037
2536.93529714433
2537.16116150826
2537.29375510341
2537.31022024362
2537.46451941253
2537.56869050682
2537.91380968893
2538.21277166922
2538.41066095458
2538.42600753907
2538.61390252905
2539.10828178656
2539.10553013948
2539.36972181519
2539.62526705518
2539.75764812474
2540.07220277178
2540.37731680854
2540.58580440935
2540.85043791456
2541.23199964206
2541.28513663158
2541.57581011398
2541.6888849118
2541.82237894431
2542.27363228599
2542.36654511694
2542.40501224819
2542.65159785685
2542.92672341473
2543.12780058389
2543.34650059843
2543.7986991197
2543.97262894151
2544.16724645138
2544.68669254259
2545.12200087247
2545.22949967003
2545.73866064138
2545.99739935795
2546.31068444425
2546.6230914643
2546.91273028266
2547.16751490476
2547.82055569848
2547.83855326003
2548.15045693001
2548.30385006879
2548.93061598864
2548.96224874442
2549.24418630664
2549.66644668404
2549.98694086196
2550.40342949184
2550.69570250892
2550.79641726603
2551.12387445331
2551.318066912
2551.40297088399
2551.92540911176
2552.25923088109
2552.59706267268
2553.18075301171
2553.56781803336
2554.03381393944
2554.52831623807
2554.85690875941
2555.3243420096
2555.50422254785
2555.90490039261
2556.51815415935
2556.79342512947
2557.34144472657
2557.80765315824
2558.23372221787
2558.52955783492
2559.02921667543
2559.49557051935
2560.0486459883
2560.43039227749
2561.36917372289
2561.75158555273
2561.98548114674
2562.63394704757
2563.0426337513
2563.72918647442
2564.27512555788
2564.82183644478
2565.46582252995
2565.82779834677
2566.66452836098
2567.48804263934
2568.40203688997
2569.45661681637
2570.87766915359
2572.00040827284
2573.83690898312
2576.22110490934
2578.77102045838
2582.24110468563
2584.80052236552
2586.42794823324
2589.1303061487
2591.64488652252
2596.14693347949
2603.88808850013
2612.050396528
2620.16729678639
2626.31456023982
2624.07889732777
2616.8279213879
2608.50791378173
2600.96084495699
2599.61546291429
2606.91160054138
2619.79795528014
2637.04387534815
2655.90968221832
2678.32147850695
2702.29212201206
2734.12240355253
2763.06748805942
2797.86855292446
2828.25561794611
2829.21294504536
2826.47496113019
2828.64654757777
2834.72259818123
2873.22056240982
2922.6221239136
2979.70342054339
3053.57039630429
3116.51473137884
3180.94229371036
3254.06049708616
3313.73575798928
3336.34862026152
3295.20705584949
3216.36051610161
3145.96611335444
3105.46505631928
3137.1727050033
3228.43838435812
3334.40161183879
3443.88848558741
3541.02953546381
3645.20732989564
3741.49115222425
3836.2835370969
3898.18255388642
3909.50224270422
3879.36734488429
3842.73590899431
3845.74724555654
3893.32772004787
4003.5502678941
4155.61048534133
4286.06498808738
4412.18216239192
4550.78199908278
4661.98835024217
4770.63128488496
4884.34974441002
4979.09634120424
5059.65522197738
5130.4360353911
5118.13257681681
4994.06353955772
4841.6942427937
4731.68743078936
4692.20675383944
4773.21411393609
4950.52728157403
5126.71576380577
5289.33266965694
5428.26937618147
5557.86091878167
5656.05421639579
5696.07771725148
5691.75207212447
5689.92595161128
5711.32336886612
5770.2897842306
5898.37703716961
6038.72021565754
6172.87484480039
6300.37991745059
6408.70901891478
6499.38526973971
6588.45907763895
6674.66280019239
6762.26209997651
6840.93430722251
6912.86084607555
6975.14092683527
7040.17091531415
7094.61855572085
7142.89111978613
7176.73927025425
7182.8887764119
7185.92094048165
7207.46618606056
7253.4512757128
7324.11086565027
7410.20797306518
7495.26332479502
7568.19713426024
7626.90990592946
7666.61621234662
7687.72861601101
7705.85017505397
7744.82024250288
7803.14436080133
7883.8808290735
7971.60248766792
8051.62978602029
8123.69301238241
8192.37350812631
8257.99426740193
8316.31790472142
8371.90581201553
8429.72651312625
8491.80624377803
8548.48594534737
8601.93576693773
8663.82495162247
8728.77622174249
8801.84368743079
8865.70945515151
8931.21955011689
8996.54758336037
9060.72242480509
9125.56409324281
9200.22356573193
9277.13955101173
9341.26428116017
9412.20708381338
9471.85491213745
9539.38296551493
9603.51914408116
9657.87989507947
9722.93410588248
9781.56369615552
9835.96087292088
9914.07182805561
10009.4805762799
10098.9819185468
10193.4249672822
10279.3628371047
10364.860885225
10445.6422523238
10536.7314235859
10630.7225254751
10722.6883815617
10807.0596246127
10899.7957685037
11006.7891242827
11114.7021621682
11225.2054451292
11316.7631178622
11404.2817362222
11507.1039585687
11616.7285824543
11722.189460968
11835.2250813749
11937.519804029
12039.5330085793
12150.0958881892
12261.1033881053
12378.1103902641
12498.9108343307
12599.0860784555
12715.722251429
12855.6642710932
12995.2277491303
13132.7786769723
13253.9381159047
13388.6095401617
13533.2028109305
13679.8953870762
13816.9128533238
13956.9730036577
14086.0383049407
14218.9691222693
14371.1920560173
14528.0650272368
14681.4286137739
14831.4506772855
14970.3386259662
15117.672889565
15269.0383049407
15419.1107761658
15548.0338139394
15703.42451986
15874.8447500587
16042.7365801277
16192.8385085178
16332.1956913234
16478.1713962931
16636.3151027393
16796.81983423
16945.2291585105
17087.1476046129
17228.7724354314
17379.1212346618
17516.9202134204
17651.9832608136
17775.8739219919
17938.2887943088
18090.9872484648
18230.5071699422
18378.7137392199
18521.5708381338
18659.1330410174
18790.412998736
18917.7994765159
19040.2138287044
19170.2623852082
19277.1838346327
19403.1754063154
19553.4267346003
19694.5496862451
19826.1006029015
19946.6784991219
20063.5006935045
20155.7606458541
20267.8924676458
20367.127291641
20463.9250008389
20572.9157168264
20664.3038892182
20758.4083958792
20843.9208957394
20945.5763749846
21007.5702564848
21074.2742251205
21150.3080558383
21235.0766881802
21298.0052012841
21342.7633583517
21407.4017292871
21485.2808301921
21526.6903390342
21565.2466303509
21622.9675339202
21660.8791624255
21699.9323609356
21724.7185322312
21761.7195501169
21794.2941801546
21829.7200870236
21851.5419682106
21881.5641547634
21883.7014798492
21868.5177067371
21852.5611794052
21865.2237894431
21857.2937383251
21835.3611704567
21841.0941040928
21841.5411740361
21834.3437377658
21809.0605586067
21761.2101933983
21748.9245925661
21724.9485240657
21697.6265254304
21694.0871634545
21658.0883714947
21614.9226183152
21568.731015313
21520.1899139831
21489.9701513406
21451.4835740092
21384.5607152045
21356.79674724
21330.1330242391
21260.1835326227
21206.4131441483
21171.4131329627
21106.8742351875
21052.5836679679
21003.3328933681
20941.282474469
20883.463445599
20858.6651939016
20807.2370387356
20746.9990268565
20717.8932674131
20686.3661200658
20635.5043791456
20586.2798067136
20544.4466504849
20528.9938255724
20517.4062985873
20486.7993311037
20460.5603572667
20436.3508685585
20421.3833290455
20418.3248285813
20417.8163946712
20429.8407959642
20437.2550698538
20432.8704824331
20422.5287692531
20462.1112068098
20488.6383094149
20496.8308184472
20559.2319772709
20597.1097079451
20657.5352848402
20694.9586749589
20766.0650272368
20845.603522332
20940.8848670597
21042.7354392009
21141.6760550777
21213.0789141061
21313.0305142001
21449.8040290377
21581.9893849062
21707.6825035514
21841.3204270646
21987.4566335947
22140.2325533271
22334.4868849342
22483.6596850147
22647.9491784208
22841.314000962
23021.3785807765
23208.697822172
23414.6786948692
23625.91006812
23837.1467209539
24060.8238330667
24315.075810114
24563.3836869834
24796.4951454682
25045.3917629557
25293.8140848536
25553.7142313844
25824.1071464525
26099.2116363352
26378.3903927249
26653.6571682643
26972.4031330746
27267.9854867395
27562.2141642711
27887.158767799
28197.2445889867
28533.2945940202
28858.0514815271
29195.1128119372
29522.7459424391
29859.3437265802
30184.5437634926
30529.2338676301
30889.4419078086
31253.0017505397
31629.0190042617
31966.4380879408
32315.7019160859
32700.2696837843
33065.7174080827
33442.4742228834
33809.8300634221
34169.5130423597
34566.6745394347
34938.7326987394
35304.7429111531
35699.1310164316
36092.0302513395
36467.1503338889
36824.109836579
37219.9222212279
37628.2271674813
38006.1535049943
38424.8740226619
38841.7605060346
39205.0233218868
39577.8891287569
40009.8842910035
40395.5505027908
40795.3970928737
41214.855806982
41634.787222738
42024.4586358094
42407.9428194315
42807.3271383989
43207.4498719254
43614.2628158522
43991.5152291361
44375.4457780114
44773.8315734723
45172.2656346126
45583.07121285
45981.3133466069
46335.5746635944
46727.1700204696
47132.6701435107
47526.1738011879
47861.2082974463
48238.0837015246
48613.7990235009
48971.5881086341
49349.8130501896
49719.9595250612
50084.243039787
50415.3454044138
50646.2312334314
50749.6105748258
50666.9765494793
50404.2108365678
49801.3086095234
48868.6112851087
47692.1891086229
46422.5513640787
45066.3224796143
43580.2012673236
41926.5313419313
40093.6131586895
38148.165361685
36117.0764812474
33902.4461527276
31636.4640496191
29426.5365879576
27387.4112090469
25524.4128756949
23770.2623516515
22134.659601123
20597.8672833637
19135.431085782
17693.0294963144
16351.7794823324
15089.2853211933
13926.3098678986
2406.50675607655
2400.24354872988
2399.74934844129
2399.62198409414
