# Supplementary material for: A miniDOAS instrument optimised for ammonia field measurements
Source: Copernicus journal article supplement (doi:10.5194/amt-9-2721-2016), 2016-06-29
Supplement: Supplementary file 2 [file amt-9-2721-2016-supplement.zip › miniDOAS_Revaluation_basic_20150513/1_Reference_Spectra/miniDOAS-ref_cal_spec-Eval201602170000/miniDOAS_SO2calSpec_201410281515-201410281518-Eval201602170000.txt]

reference file calculation performed on: 201602170000
spectrometer: QE65000 serial-QEPB0591, grating-2400
conditions: calibration measurement of SO2 (concentration in ppm, temperature in K, pressure in mbar): 29.04,293,1000
cuvette length (m): 0.075
accumulation: averaged 3 avg spectra with 855 spectra each
averaging period: 201410281515-201410281518
avg. spectrometer integration time (ms): 70
avg. TEC temperature (deg C): -6.87
avg. DOAS temperature (deg C): 31.57
---
2396.1820662768
2392.85536062378
2392.4701754386
2392.47563352827
2506.41325536062
2505.89317738791
2505.6530214425
2505.52592592593
2505.63937621832
2505.45185185185
2505.10799220273
2504.64639376218
2504.63274853801
2504.57115009747
2504.46666666667
2504.33138401559
2504.15516569201
2503.84561403509
2503.93138401559
2503.93918128655
2503.69434697856
2503.50565302144
2503.31189083821
2503.13489278752
2503.09785575049
2503.42495126706
2502.99727095517
2503.01325536062
2502.87680311891
2502.67797270955
2502.55516569201
2502.51734892787
2502.2440545809
2502.2955165692
2502.1992202729
2502.13294346979
2502.10838206628
2502.24288499025
2502.01520467836
2502.01208576998
2502.1567251462
2502.18752436647
2501.95048732943
2501.76335282651
2501.62962962963
2501.57660818713
2501.77504873294
2501.5746588694
2501.52826510721
2501.49278752437
2501.54736842105
2501.48070175439
2501.40584795322
2501.35321637427
2501.53294346979
2501.52748538012
2501.67875243665
2501.49434697856
2501.44717348928
2501.27368421053
2501.35867446394
2501.48771929825
2501.51773879142
2501.34970760234
2501.44639376218
2501.16881091618
2501.1918128655
2501.08382066277
2501.36374269006
2501.3730994152
2501.38011695906
2501.41637426901
2501.42261208577
2501.48031189084
2501.59493177388
2501.58674463938
2501.62105263158
2501.53567251462
2501.60701754386
2501.60233918129
2501.4701754386
2501.52826510721
2501.4253411306
2501.45263157895
2501.47641325536
2501.52943469786
2501.58050682261
2501.46081871345
2501.56959064327
2501.36296296296
2501.48265107213
2501.4962962963
2501.4783625731
2501.3469785575
2501.73918128655
2501.33996101365
2501.26198830409
2501.37270955166
2501.32904483431
2501.42884990253
2501.4007797271
2501.19493177388
2501.26510721248
2501.32943469786
2501.35282651072
2501.26861598441
2501.27797270955
2501.35633528265
2501.11656920078
2501.1216374269
2501.35516569201
2501.46978557505
2501.22807017544
2501.19649122807
2501.31578947368
2501.2
2501.261208577
2501.30214424951
2501.2530214425
2501.3567251462
2501.31578947368
2501.26159844055
2501.1918128655
2501.34814814815
2501.22456140351
2501.13372319688
2501.45263157895
2501.35555555556
2501.33411306043
2501.41130604288
2501.54113060429
2501.40389863548
2501.4179337232
2501.53723196881
2501.38245614035
2501.47641325536
2501.52397660819
2501.58011695906
2501.34580896686
2501.54385964912
2501.31150097466
2501.12085769981
2501.24093567251
2501.63547758285
2501.45614035088
2501.58440545809
2501.54541910331
2501.57660818713
2501.5469785575
2501.56764132554
2501.47563352827
2501.56374269006
2501.71617933723
2501.69512670565
2501.68460038986
2501.81637426901
2501.74152046784
2501.6701754386
2501.66237816764
2501.69005847953
2501.69824561403
2501.52904483431
2501.45185185185
2501.62573099415
2501.64093567251
2501.61988304094
2501.42300194932
2501.62027290448
2501.4350877193
2501.53333333333
2501.56179337232
2501.54074074074
2501.522417154
2501.55321637427
2501.58011695906
2501.63976608187
2501.54152046784
2501.36374269006
2501.68615984405
2501.6865497076
2501.76335282651
2501.68148148148
2501.70253411306
2501.80974658869
2501.80701754386
2501.72085769981
2501.78596491228
2501.62456140351
2501.63274853801
2501.62027290448
2501.58245614035
2501.4962962963
2501.461208577
2501.38791423002
2501.52592592593
2501.41208576998
2501.51072124756
2501.36647173489
2501.27368421053
2501.13840155945
2501.30643274854
2501.34385964912
2501.55477582846
2501.72319688109
2501.62729044834
2501.53684210526
2501.63703703704
2501.5656920078
2501.50019493177
2501.52436647173
2501.61130604288
2501.45458089669
2501.43274853801
2501.4179337232
2501.27641325536
2501.23118908382
2501.28148148148
2501.33138401559
2501.15243664717
2501.39142300195
2501.38557504873
2501.37660818713
2501.40038986355
2501.35399610136
2501.15633528265
2501.32943469786
2501.25419103314
2501.37894736842
2501.33333333333
2501.28771929825
2501.37816764133
2501.4350877193
2501.34424951267
2501.46978557505
2501.40389863548
2501.45419103314
2501.42651072125
2501.36257309942
2501.61442495127
2501.37621832359
2501.26159844055
2501.55945419103
2501.3828460039
2501.47680311891
2501.37855750487
2501.40545808967
2501.3208576998
2501.34152046784
2501.33762183236
2501.40623781676
2501.46588693957
2501.47056530214
2501.41637426901
2501.56335282651
2501.71656920078
2501.70409356725
2501.63469785575
2501.58245614035
2501.61286549708
2501.62222222222
2501.68226120858
2501.72826510721
2501.63196881092
2501.7469785575
2501.8432748538
2501.89278752437
2501.86666666667
2501.97076023392
2501.84132553606
2501.84522417154
2501.96374269006
2502.08070175439
2501.9306042885
2501.79727095517
2502.17855750487
2502.19220272904
2502.06861598441
2502.07056530214
2502.24093567251
2502.21871345029
2502.34463937622
2502.22651072125
2502.39415204678
2502.38050682261
2502.32514619883
2502.3992202729
2502.37543859649
2502.23586744639
2502.30994152047
2502.37582846004
2502.49473684211
2502.47173489279
2502.68966861598
2502.38167641326
2502.62378167641
2502.65185185185
2502.89512670565
2502.75165692008
2502.81754385965
2502.74191033138
2503.03079922027
2503.12670565302
2503.2432748538
2503.07719298246
2503.04132553606
2503.04249512671
2503.25653021442
2503.14697855751
2503.16374269006
2503.13489278752
2503.30175438597
2503.24288499025
2503.46393762183
2503.45808966862
2503.67134502924
2503.50214424951
2503.49239766082
2503.64522417154
2503.80740740741
2503.68576998051
2503.75126705653
2503.71890838207
2503.96959064327
2503.94346978557
2504.11695906433
2504.2007797271
2504.24678362573
2504.24834307992
2504.38479532164
2504.4873294347
2504.71734892788
2504.55906432749
2504.68499025341
2504.65536062378
2504.74307992203
2504.75165692008
2504.82807017544
2504.87212475634
2504.88265107212
2505.03313840156
2505.24834307992
2505.15867446394
2505.16413255361
2505.18557504873
2505.4955165692
2505.43703703704
2505.58557504873
2505.56374269006
2505.72397660819
2505.84249512671
2505.81871345029
2506.08148148148
2506.0693957115
2506.2693957115
2506.2514619883
2506.33801169591
2506.30019493177
2506.45458089669
2506.82339181287
2506.57816764133
2506.72475633528
2506.77543859649
2507.07953216374
2506.96218323587
2507.35009746589
2507.37855750487
2507.40389863548
2507.52007797271
2507.69902534113
2507.50526315789
2507.73567251462
2508.02183235867
2507.93528265107
2507.84132553606
2507.97270955166
2508.19610136452
2508.29200779727
2508.30604288499
2508.5910331384
2508.52124756335
2508.45769980507
2508.48265107212
2508.6179337232
2508.75750487329
2508.74931773879
2508.92397660819
2508.87641325536
2508.99805068226
2508.97270955166
2508.9298245614
2509.06861598441
2509.16842105263
2509.28499025341
2509.44522417154
2509.67563352827
2509.87992202729
2509.90292397661
2510.16062378168
2510.21520467836
2510.27719298246
2510.45730994152
2510.42651072125
2510.47992202729
2510.65380116959
2510.73723196881
2510.87485380117
2511.06588693957
2511.14502923977
2511.30253411306
2511.2171539961
2511.43157894737
2511.42417153996
2511.38674463938
2511.6
2511.65029239766
2511.89668615984
2511.67290448343
2511.7656920078
2511.9918128655
2512.13723196881
2512.46198830409
2512.4522417154
2512.7910331384
2512.88382066277
2513.38635477583
2513.35516569201
2513.42222222222
2513.54931773879
2513.86588693957
2513.97543859649
2514.04054580897
2514.1216374269
2514.18635477583
2514.44171539961
2514.62339181287
2514.59883040936
2514.95165692008
2515.00779727096
2515.322417154
2515.48966861598
2515.78908382066
2516.04795321637
2516.10136452242
2516.18986354776
2516.31656920078
2516.45458089669
2516.69590643275
2516.64132553606
2516.8701754386
2517.16686159844
2517.34619883041
2517.58245614035
2518.06705653021
2517.9208576998
2518.16023391813
2518.28966861598
2518.46393762183
2518.69044834308
2519.00311890838
2519.20584795322
2519.20194931774
2519.51072124756
2519.8350877193
2520.13801169591
2520.23352826511
2520.06315789474
2520.31189083821
2520.40857699805
2520.89941520468
2521.08888888889
2521.20974658869
2521.39805068226
2521.65341130604
2521.85263157895
2522.00389863548
2522.15087719298
2522.29278752437
2522.73138401559
2522.89746588694
2523.08265107212
2523.30097465887
2523.48031189084
2523.85575048733
2523.98869395712
2524.21169590643
2524.44795321637
2524.41364522417
2524.53138401559
2524.92787524366
2525.11812865497
2525.56335282651
2525.52553606238
2525.83547758285
2526.04132553606
2526.322417154
2526.64951267057
2526.78674463938
2526.83391812866
2527.11929824561
2527.09161793372
2527.13606237817
2527.41559454191
2527.69473684211
2527.75204678363
2528.14736842105
2528.43313840156
2528.67056530214
2528.77504873294
2528.98011695906
2529.06237816764
2529.44288499025
2529.69317738791
2530.0171539961
2529.93021442495
2530.31968810916
2530.66159844055
2530.73489278752
2531.18947368421
2531.37115009747
2531.56647173489
2531.85886939571
2532.29161793372
2532.49044834308
2532.96335282651
2533.29044834308
2533.26471734893
2533.77894736842
2533.83781676413
2533.95243664717
2534.4350877193
2534.51578947368
2534.7306042885
2535.11228070175
2535.3559454191
2535.58011695906
2535.76140350877
2536.36374269006
2536.71695906433
2536.84717348928
2537.2701754386
2537.71617933723
2538.01091617934
2538.52124756335
2538.86900584795
2539.28382066277
2539.59610136452
2540.02105263158
2540.45808966862
2540.91812865497
2541.19493177388
2541.53645224172
2541.71500974659
2542.33996101365
2542.6522417154
2543.0253411306
2543.45536062378
2543.83820662768
2544.15282651072
2544.58674463938
2544.92358674464
2545.20506822612
2545.53450292398
2545.85497076023
2546.46783625731
2546.87329434698
2547.3216374269
2547.9134502924
2548.461208577
2549.15828460039
2549.69512670565
2550.1037037037
2550.76764132554
2551.19493177388
2551.90877192982
2552.51812865497
2553.12085769981
2553.95282651072
2554.75087719298
2555.72046783626
2556.78167641326
2557.86237816764
2559.21598440546
2560.38869395711
2561.14541910331
2562.42768031189
2563.74541910331
2564.3656920078
2565.04912280702
2565.19688109162
2564.96335282651
2564.8253411306
2565.21208576998
2566.46705653021
2568.16452241715
2570.94541910331
2574.59883040936
2579.51773879142
2585.77543859649
2594.09668615984
2602.41247563353
2612.45263157895
2624.53567251462
2636.3746588694
2650.75789473684
2662.37192982456
2667.19610136452
2676.27251461988
2685.50760233918
2697.19805068226
2721.24249512671
2747.42183235867
2771.45029239766
2792.21637426901
2788.12826510721
2759.99610136452
2729.01325536062
2701.95867446394
2691.40194931774
2712.77192982456
2755.85769980507
2806.29239766082
2858.35633528265
2912.97621832359
2965.55204678363
3027.85458089669
3086.1395711501
3148.14970760234
3206.69785575049
3226.76413255361
3221.42573099415
3228.57699805068
3234.73684210526
3278.15360623782
3358.47212475634
3448.79415204678
3555.41130604288
3654.02066276803
3740.82495126706
3836.57933723197
3920.26003898635
3965.44444444444
3938.04561403509
3852.61676413255
3770.58401559454
3716.27329434698
3729.14502923977
3829.77192982456
3960.83157894737
4093.37621832359
4212.2269005848
4336.96686159844
4458.00935672515
4581.64054580897
4683.85575048733
4749.4261208577
4771.79688109162
4782.19142300195
4809.63820662768
4874.722417154
4982.65341130604
5129.47953216374
5259.87641325536
5367.59961013645
5470.90526315789
5556.96842105263
5646.05769980507
5751.28966861598
5867.57076023392
5983.70838206628
6095.09902534113
6150.00857699805
6117.01949317739
6043.97660818713
5988.48927875244
5977.80779727096
6047.02884990253
6211.38674463938
6382.2701754386
6521.18713450292
6611.86354775828
6690.4007797271
6759.1037037037
6808.69512670565
6847.50526315789
6899.28304093567
6963.55945419103
7047.52670565302
7178.2253411306
7334.15009746589
7486.69512670565
7631.64912280702
7762.16062378168
7875.76764132554
7980.11929824561
8073.49200779727
8152.40506822612
8215.48109161793
8261.00467836257
8281.38752436647
8313.2261208577
8361.26510721248
8425.20428849903
8518.91461988304
8619.36101364522
8709.55555555556
8798.34697855751
8889.1746588694
8979.54580896686
9083.73372319688
9195.9306042885
9298.95399610137
9391.08810916179
9466.92202729045
9489.21247563353
9453.52046783626
9418.16530214425
9403.82962962963
9433.99064327485
9526.49044834308
9661.48031189084
9798.26627680312
9917.92007797271
10033.5945419103
10140.583625731
10231.2557504873
10316.0791423002
10399.0335282651
10470.8382066277
10547.220662768
10637.9851851852
10714.8619883041
10774.4764132554
10806.2658869396
10822.9115009747
10835.9337231969
10873.2764132554
10952.9169590643
11073.5235867446
11218.2670565302
11370.02417154
11533.330994152
11671.0424951267
11801.6830409357
11919.0705653021
12026.6202729045
12145.0838206628
12254.510331384
12360.5001949318
12481.938791423
12590.4869395712
12640.1255360624
12644.6093567251
12621.1649122807
12614.4198830409
12657.1730994152
12785.3711500975
12972.9968810916
13175.5664717349
13358.9984405458
13543.5270955166
13731.0171539961
13906.9251461988
14084.4834307992
14237.4167641326
14382.1458089669
14536.1056530214
14687.8187134503
14817.730994152
14910.7781676413
14938.1536062378
14941.8269005848
14958.0658869396
15006.5730994152
15121.5828460039
15300.7192982456
15480.2269005848
15697.0339181287
15939.7781676413
16180.8304093567
16424.8779727096
16642.0849902534
16860.9212475634
17080.3469785575
17301.837037037
17507.1692007797
17713.3126705653
17897.6729044834
18044.6194931774
18162.9832358674
18256.5477582846
18306.7068226121
18352.8553606238
18440.61208577
18602.3333333333
18820.3130604288
19089.8421052632
19352.1341130604
19625.7890838207
19902.8873294347
20158.2148148148
20398.530994152
20621.0015594542
20847.0947368421
21078.3536062378
21308.1348927875
21520.6810916179
21710.0198830409
21853.2421052632
21918.7769980507
21912.8541910331
21927
21983.4487329435
22153.41208577
22395.3536062378
22652.3972709552
22906.1040935672
23134.3403508772
23349.2553606238
23553.4756335283
23742.0943469786
23932.2417153996
24130.2159844055
24310.2884990253
24509.3734892788
24721.2530214425
24912.6140350877
25058.8222222222
25135.9520467836
25176.7083820663
25174.0179337232
25193.9173489279
25273.1645224172
25403.3150097466
25557.2717348928
25729.918128655
25908.5586744639
26059.2280701754
26204.6978557505
26308.1115009747
26407.1021442495
26510.979337232
26629.7076023392
26721.7625730994
26772.5325536062
26843.2366471735
26943.0343079922
27010.2530214425
27061.7614035088
27078.2003898635
27003.9426900585
26921.2265107212
26865.1883040936
26888.8662768031
26995.820662768
27142.5668615984
27263.0974658869
27357.053411306
27399.8565302144
27418.3056530214
27431.8152046784
27474.1808966862
27486.0035087719
27469.0456140351
27477.0089668616
27459.5598440546
27441.1037037037
27406.8580896686
27328.3200779727
27248.9263157895
27136.8265107212
27004.0783625731
26895.2226120858
26797.9341130604
26747.2877192982
26730.8814814815
26725.0647173489
26731.2779727096
26710.8635477583
26647.6881091618
26605.9251461988
26554.3883040936
26460.3212475634
26381.4771929825
26301.0674463938
26197.9684210526
26119.2198830409
26033.7773879142
25928.8873294347
25812.5754385965
25703.0300194932
25532.1976608187
25344.8530214425
25199.2959064327
25073.4826510721
24964.4218323587
24889.1660818713
24830.844834308
24788.7352826511
24734.2214424951
24647.9403508772
24565.5988304094
24489.5220272904
24418.6003898635
24350.0214424951
24273.5438596491
24205.8725146199
24137.1208576998
24059.2335282651
23970.4144249513
23915.1883040936
23823.7212475634
23701.5500974659
23620.0846003899
23522.1216374269
23468.0826510721
23408.1091617934
23401.6460038986
23409.2935672515
23429.1157894737
23448.5929824561
23461.5633528265
23453.9064327485
23471.7111111111
23516.7099415205
23564.3317738791
23599.7192982456
23641.7325536062
23702.2502923977
23759.543079922
23852.807797271
23914.2187134503
23981.3789473684
24054.5937621832
24115.9235867446
24197.3306042885
24305.1676413255
24419.0920077973
24540.8335282651
24680.2222222222
24847.0467836257
25008.9419103314
25163.9111111111
25342.6506822612
25525.7228070175
25725.5766081871
25935.5056530214
26151.2471734893
26383.1738791423
26596.4159844055
26844.3270955166
27075.9610136452
27304.3286549708
27567.714619883
27818.7578947368
28091.0807017544
28351.6873294347
28634.9547758285
28904.3777777778
29185.2358674464
29470.7142300195
29777.334502924
30100.5165692008
30425.3095516569
30767.7446393762
31077.9805068226
31405.8584795322
31778.6666666667
32135.4557504873
32496.4510721248
32849.2573099415
33195.2701754386
33571.1738791423
33920.5699805068
34271.4846003899
34628.637037037
34953.1419103314
35274.7828460039
35612.0417153996
36001.9423001949
36406.081871345
36794.1216374269
37240.4136452242
37691.6760233918
38100.5372319688
38499.6701754386
38936.8779727096
39336.1317738791
39745.1953216374
40189.3949317739
40645.0374269006
41072.4869395712
41497.2050682261
41932.0179337232
42360.0124756335
42777.9883040936
43173.2900584795
43569.1021442495
43966.3801169591
44369.8167641326
44795.9750487329
45214.6214424951
45607.5259259259
46040.5906432749
46466.7216374269
46888.4974658869
47265.1575048733
47677.6046783626
48105.1750487329
48510.738791423
48880.6089668616
49138.7329434698
49256.1064327485
49192.9668615984
48897.6440545809
48410.7286549708
47720.7458089669
46941.2292397661
46073.632748538
45107.2881091618
43959.1649122807
42708.1754385965
41341.3076023392
39864.1403508772
38226.8892787524
36478.1621832359
34762.3493177388
33146.7730994152
31584.8662768031
30090.4335282651
28630.4023391813
27232.4050682261
25897.2050682261
24561.6615984405
23246.1949317739
21963.2651072125
20697.0748538012
19400.7325536062
18147.992202729
16936.8350877193
15795.0085769981
2404.81286549708
2398.39610136452
2397.77037037037
2397.5910331384
