# Supplementary material for: A miniDOAS instrument optimised for ammonia field measurements
Source: Copernicus journal article supplement (doi:10.5194/amt-9-2721-2016), 2016-06-29
Supplement: Supplementary file 2 [file amt-9-2721-2016-supplement.zip › miniDOAS_Revaluation_basic_20150513/1_Reference_Spectra/miniDOAS-ref_cal_spec-Eval201602170000/Spectrometer-wavelengths-Eval201602170000.txt]

137.154809762546
137.25815349717
137.361464332349
137.464742296559
137.56798741828
137.671199725988
137.77437924816
137.877526013275
137.980640049809
138.08372138624
138.186770051045
138.289786072703
138.392769479689
138.495720300483
138.59863856356
138.701524297399
138.804377530477
138.907198291272
139.00998660826
139.11274250992
139.215466024729
139.318157181164
139.420816007702
139.523442532822
139.626036785
139.728598792714
139.831128584442
139.93362618866
140.036091633847
140.13852494848
140.240926161036
140.343295299992
140.445632393827
140.547937471017
140.65021056004
140.752451689373
140.854660887495
140.956838182881
141.058983604011
141.16109717936
141.263178937407
141.365228906629
141.467247115504
141.569233592508
141.67118836612
141.773111464817
141.875002917076
141.976862751374
142.07869099619
142.18048768
142.282252831282
142.383986478514
142.485688650172
142.587359374735
142.68899868068
142.790606596484
142.892183150624
142.993728371579
143.095242287825
143.19672492784
143.298176320101
143.399596493087
143.500985475273
143.602343295139
143.70366998116
143.804965561815
143.906230065581
144.007463520936
144.108665956356
144.20983740032
144.310977881305
144.412087427788
144.513166068246
144.614213831158
144.715230745
144.81621683825
144.917172139386
145.018096676884
145.118990479223
145.21985357488
145.320685992332
145.421487760056
145.522258906531
145.622999460233
145.72370944964
145.824388903229
145.925037849479
146.025656316865
146.126244333867
146.22680192896
146.327329130623
146.427825967333
146.528292467568
146.628728659804
146.72913457252
146.829510234193
146.929855673299
147.030170918318
147.130455997726
147.23071094
147.330935773618
147.431130527058
147.531295228796
147.631429907311
147.73153459108
147.83160930858
147.931654088288
148.031668958683
148.131653948241
148.23160908544
148.331534398757
148.431429916671
148.531295667657
148.631131680195
148.73093798276
148.830714603831
148.930461571885
149.0301789154
149.129866662852
149.22952484272
149.329153483481
149.428752613612
149.52832226159
149.627862455894
149.727373225
149.826854597386
149.92630660153
150.025729265908
150.125122618999
150.22448668928
150.323821505228
150.42312709532
150.522403488035
150.621650711849
150.72086879524
150.820057766685
150.919217654663
151.018348487649
151.117450294123
151.21652310256
151.315566941439
151.414581839237
151.513567824432
151.6125249255
151.71145317092
151.810352589169
151.909223208724
152.008065058062
152.106878165662
152.20566256
152.304418269554
152.403145322802
152.50184374822
152.600513574287
152.69915482948
152.797767542276
152.896351741152
152.994907454587
153.093434711057
153.19193353904
153.290403967013
153.388846023455
153.487259736841
153.585645135651
153.68400224836
153.782331103447
153.880631729389
153.978904154664
154.077148407748
154.17536451712
154.273552511257
154.371712418635
154.469844267734
154.56794808703
154.666023905
154.764071750122
154.862091650874
154.960083635733
155.058047733175
155.15598397168
155.253892379724
155.351772985784
155.449625818339
155.547450905865
155.64524827684
155.743017959741
155.840759983047
155.938474375233
156.036161164779
156.13382038016
156.231452049855
156.329056202341
156.426632866096
156.524182069596
156.62170384132
156.719198209745
156.816665203347
156.914104850606
157.011517179998
157.10890222
157.20625999909
157.303590545746
157.400893888444
157.498170055663
157.59541907588
157.692640977572
157.789835789216
157.887003539291
157.984144256273
158.08125796864
158.178344704869
158.275404493439
158.372437362825
158.469443341507
158.56642245796
158.663374740663
158.760300218093
158.857198918728
158.954070871044
159.05091610352
159.147734644633
159.24452652286
159.341291766678
159.438030404566
159.534742465
159.631427976458
159.728086967418
159.824719466356
159.921325501751
160.01790510208
160.11445829582
160.210985111448
160.307485577443
160.403959722281
160.50040757444
160.596829162397
160.693224514631
160.789593659617
160.885936625835
160.98225344176
161.078544135871
161.174808736645
161.27104727256
161.367259772092
161.46344626372
161.559606775921
161.655741337172
161.75184997595
161.847932720734
161.9439896
162.040020642226
162.13602587589
162.232005329468
162.327959031439
162.42388701028
162.519789294468
162.61566591248
162.711516892795
162.807342263889
162.90314205424
162.998916292325
163.094665006623
163.190388225609
163.286085977763
163.38175829156
163.477405195479
163.573026717997
163.668622887592
163.76419373274
163.85973928192
163.955259563609
164.050754606284
164.146224438422
164.241669088502
164.337088585
164.432482956394
164.527852231162
164.62319643778
164.718515604727
164.81380976048
164.909078933516
165.004323152312
165.099542445347
165.194736841097
165.28990636804
165.385051054653
165.480170929415
165.575266020801
165.670336357291
165.76538196736
165.860402879487
165.955399122149
166.050370723824
166.145317712988
166.24024011812
166.335137967697
166.430011290196
166.524860114094
166.61968446787
166.71448438
166.809259878962
166.904010993234
166.998737751292
167.093440181615
167.18811831268
167.282772172964
167.377401790944
167.472007195099
167.566588413905
167.66114547584
167.755678409381
167.850187243007
167.944672005193
168.039132724419
168.13356942916
168.227982147895
168.322370909101
168.416735741256
168.511076672836
168.60539373232
168.699686948185
168.793956348908
168.888201962966
168.982423818838
169.076621945
169.17079636993
169.264947122106
169.359074230004
169.453177722103
169.54725762688
169.641313972812
169.735346788376
169.829356102051
169.923341942313
170.01730433764
170.111243316509
170.205158907399
170.299051138785
170.392920039147
170.48676563696
170.580587960703
170.674387038853
170.768162899888
170.861915572284
170.95564508452
171.049351465073
171.14303474242
171.236694945038
171.330332101406
171.42394624
171.517537389298
171.611105577778
171.704650833916
171.798173186191
171.89167266308
171.98514929306
172.078603104608
172.172034126203
172.265442386321
172.35882791344
172.452190736037
172.545530882591
172.638848381577
172.732143261475
172.82541555076
172.918665277911
173.011892471405
173.10509715972
173.198279371332
173.29143913472
173.384576478361
173.477691430731
173.57078402031
173.663854275574
173.756902225
173.849927897066
173.94293132025
174.035912523028
174.128871533879
174.22180838128
174.314723093708
174.40761569964
174.500486227555
174.593334705929
174.68616116324
174.778965627965
174.871748128583
174.964508693569
175.057247351403
175.14996413056
175.242659059519
175.335332166757
175.427983480752
175.52061302998
175.61322084292
175.705806948049
175.798371373844
175.890914148782
175.983435301342
176.07593486
176.168412853234
176.260869309522
176.35330425734
176.445717725167
176.53810974148
176.630480334756
176.722829533472
176.815157366107
176.907463861137
176.99974904704
177.092012952293
177.184255605375
177.276477034761
177.368677268931
177.46085633636
177.553014265527
177.645151084909
177.737266822984
177.829361508228
177.92143516912
178.013487834137
178.105519531756
178.197530290454
178.28952013871
178.381489105
178.473437217802
178.565364505594
178.657270996852
178.749156720055
178.84102170368
178.932865976204
179.024689566104
179.116492501859
179.208274811945
179.30003652484
179.391777669021
179.483498272967
179.575198365153
179.666877974059
179.75853712816
179.850175855935
179.941794185861
180.033392146416
180.124969766076
180.21652707332
180.308064096625
180.399580864468
180.491077405326
180.582553747678
180.67400992
180.76544595077
180.856861868466
180.948257701564
181.039633478543
181.13098922788
181.222324978052
181.313640757536
181.404936594811
181.496212518353
181.58746855664
181.678704738149
181.769921091359
181.861117644745
181.952294426787
182.04345146596
182.134588790743
182.225706429613
182.316804411048
182.407882763524
182.49894151552
182.589980695513
182.68100033198
182.772000453398
182.862981088246
182.953942265
183.044884012138
183.135806358138
183.226709331476
183.317592960631
183.40845727408
183.4993023003
183.590128067768
183.680934604963
183.771721940361
183.86249010244
183.953239119677
184.043969020551
184.134679833537
184.225371587115
184.31604430976
184.406698029951
184.497332776165
184.58794857688
184.678545460572
184.76912345572
184.859682590801
184.950222894291
185.04074439467
185.131247120414
185.2217311
185.312196361906
185.40264293461
185.493070846588
185.583480126319
185.67387080228
185.764242902948
185.8545964568
185.944931492315
186.035248037969
186.12554612224
186.215825773605
186.306087020543
186.396329891529
186.486554415043
186.57676061956
186.666948533559
186.757118185517
186.847269603912
186.93740281722
187.02751785392
187.117614742489
187.207693511404
187.297754189142
187.387796804182
187.477821385
187.567827960074
187.657816557882
187.7477872069
187.837739935607
187.92767477248
188.017591745996
188.107490884632
188.197372216867
188.287235771177
188.37708157604
188.466909659933
188.556720051335
188.646512778721
188.736287870571
188.82604535536
188.915785261567
189.005507617669
189.095212452144
189.184899793468
189.27456967012
189.364222110577
189.453857143316
189.543474796814
189.63307509955
189.72265808
189.812223766642
189.901772187954
189.991303372412
190.080817348495
190.17031414468
190.259793789444
190.349256311264
190.438701738619
190.528130099985
190.61754142384
190.706935738661
190.796313072927
190.885673455113
190.975016913699
191.06434347716
191.153653173975
191.242946032621
191.332222081576
191.421481349316
191.51072386432
191.599949655065
191.689158750028
191.778351177686
191.867526966518
191.956686145
192.04582874161
192.134954784826
192.224064303124
192.313157324983
192.40223387888
192.491293993292
192.580337696696
192.669365017571
192.758375984393
192.84737062564
192.936348969789
193.025311045319
193.114256880705
193.203186504427
193.29209994496
193.380997230783
193.469878390373
193.558743452208
193.647592444764
193.73642539652
193.825242335953
193.91404329154
194.002828291758
194.091597365086
194.18035054
194.269087844978
194.357809308498
194.446514959036
194.535204825071
194.62387893508
194.71253731754
194.801180000928
194.889807013723
194.978418384401
195.06701414144
195.155594313317
195.244158928511
195.332708015497
195.421241602755
195.50975971876
195.598262391991
195.686749650925
195.77522152404
195.863678039812
195.95211922672
196.040545113241
196.128955727852
196.21735109903
196.305731255254
196.394096225
196.482446036746
196.57078071897
196.659100300148
196.747404808759
196.83569427328
196.923968722188
197.01222818396
197.100472687075
197.188702260009
197.27691693124
197.365116729245
197.453301682503
197.541471819489
197.629627168683
197.71776775856
197.805893617599
197.894004774277
197.982101257072
198.07018309446
198.15825031492
198.246302946929
198.334341018964
198.422364559502
198.510373597022
198.59836816
198.686348276914
198.774313976242
198.86226528646
198.950202236047
199.03812485348
199.126033167236
199.213927205792
199.301806997627
199.389672571217
199.47752395504
199.565361177573
199.653184267295
199.740993252681
199.828788162211
199.91656902436
200.004335867607
200.092088720429
200.179827611304
200.267552568708
200.35526362112
200.442960797017
200.530644124876
200.618313633174
200.70596935039
200.793611305
200.881239525482
200.968854040314
201.056454877972
201.144042066935
201.23161563568
201.319175612684
201.406722026424
201.494254905379
201.581774278025
201.66928017284
201.756772618301
201.844251642887
201.931717275073
202.019169543339
202.10660847616
202.194034102015
202.281446449381
202.368845546736
202.456231422556
202.54360410532
202.630963623505
202.718310005588
202.805643280046
202.892963475358
202.98027062
203.06756474245
203.154845871186
203.242114034684
203.329369261423
203.41661157988
203.503841018532
203.591057605856
203.678261370331
203.765452340433
203.85263054464
203.939796011429
204.026948769279
204.114088846665
204.201216272067
204.28833107396
204.375433280823
204.462522921133
204.549600023368
204.636664616004
204.72371672752
204.810756386393
204.8977836211
204.984798460118
205.071800931926
205.158791065
205.245768887818
205.332734428858
205.419687716596
205.506628779511
205.59355764608
205.68047434478
205.767378904088
205.854271352483
205.941151718441
206.02802003044
206.114876316957
206.201720606471
206.288552927457
206.375373308395
206.46218177776
206.548978364031
206.635763095685
206.7225360012
206.809297109052
206.89604644772
206.982784045681
207.069509931412
207.15622413339
207.242926680094
207.3296176
207.416296921586
207.50296467333
207.589620883708
207.676265581199
207.76289879428
207.849520551428
207.93613088112
208.022729811835
208.109317372049
208.19589359024
208.282458494885
208.369012114463
208.455554477449
208.542085612323
208.62860554756
208.715114311639
208.801611933037
208.888098440232
208.9745738617
209.06103822592
209.147491561369
209.233933896523
209.320365259862
209.406785679862
209.493195185
209.579593803754
209.665981564602
209.75235849602
209.838724626487
209.92507998448
210.011424598476
210.097758496952
210.184081708387
210.270394261257
210.35669618404
210.442987505213
210.529268253255
210.615538456641
210.701798143851
210.78804734336
210.874286083647
210.960514393189
211.046732300464
211.132939833948
211.21913702212
211.305323893457
211.391500476436
211.477666799534
211.56382289123
211.64996878
211.736104494322
211.822230062674
211.908345513532
211.994450875375
212.08054617668
212.166631445924
212.252706711584
212.338772002139
212.424827346065
212.51087277184
212.596908307941
212.682933982847
212.768949825033
212.854955862979
212.94095212516
213.026938640055
213.112915436141
213.198882541896
213.284839985796
213.37078779632
213.456726001945
213.542654631148
213.628573712406
213.714483274198
213.800383345
213.88627395329
213.972155127546
214.058026896244
214.143889287863
214.22974233088
214.315586053772
214.401420485016
214.487245653091
214.573061586473
214.65886831364
214.744665863069
214.830454263239
214.916233542625
215.002003729707
215.08776485296
215.173516940863
215.259260021893
215.344994124528
215.430719277244
215.51643550852
215.602142846833
215.68784132066
215.773530958478
215.859211788766
215.94488384
216.030547140658
216.116201719218
216.201847604156
216.287484823951
216.37311340708
216.45873338202
216.544344777248
216.629947621243
216.715541942481
216.80112776944
216.886705130597
216.972274054431
217.057834569417
217.143386704035
217.22893048676
217.314465946071
217.399993110445
217.48551200836
217.571022668292
217.65652511872
217.742019388121
217.827505504971
217.91298349775
217.998453394934
218.083915225
218.169369016426
218.25481479769
218.340252597268
218.425682443639
218.51110436528
218.596518390668
218.68192454828
218.767322866595
218.852713374089
218.93809609924
219.023471070525
219.108838316423
219.194197865409
219.279549745963
219.36489398656
219.450230615679
219.535559661797
219.620881153392
219.70619511894
219.79150158692
219.876800585809
219.962092144083
220.047376290222
220.132653052702
220.21792246
220.303184540594
220.388439322962
220.47368683558
220.558927106927
220.64416016548
220.729386039716
220.814604758112
220.899816349147
220.985020841297
221.07021826304
221.155408642853
221.240592009215
221.325768390601
221.410937815491
221.49610031236
221.581255909687
221.666404635949
221.751546519624
221.836681589188
221.92180987312
222.006931399897
222.092046197996
222.177154295894
222.26225572207
222.347350505
222.432438673162
222.517520255034
222.602595279092
222.687663773815
222.77272576768
222.857781289164
222.942830366744
223.027873028899
223.112909304105
223.19793922084
223.282962807581
223.367980092807
223.452991104993
223.537995872619
223.62299442416
223.707986788095
223.792972992901
223.877953067056
223.962927039036
224.04789493732
224.132856790385
224.217812626708
224.302762474766
224.387706363038
224.47264432
224.55757637413
224.642502553906
224.727422887804
224.812337404303
224.89724613188
224.982149099012
225.067046334176
225.151937865851
225.236823722513
225.32170393264
225.406578524709
225.491447527199
225.576310968585
225.661168877347
225.74602128196
225.830868210903
225.915709692653
226.000545755688
226.085376428484
226.17020173952
226.255021717273
226.339836390219
226.424645786838
226.509449935606
226.594248865
226.679042603498
226.763831179578
226.848614621716
226.933392958391
227.01816621808
227.10293442926
227.187697620408
227.272455820003
227.357209056521
227.44195735844
227.526700754237
227.611439272391
227.696172941377
227.780901789675
227.86562584576
227.950345138111
228.035059695205
228.11976954552
228.204474717532
228.28917523972
228.373871140561
228.458562448532
228.54324919211
228.627931399774
228.7126091
228.797282321266
228.88195109205
228.966615440828
229.051275396079
229.13593098628
229.220582239908
229.30522918544
229.389871851355
229.474510266129
229.55914445824
229.643774456165
229.728400288383
229.813021983369
229.897639569603
229.98225307556
230.066862529719
230.151467960557
230.236069396552
230.32066686618
230.40526039792
230.489850020249
230.574435761644
230.659017650582
230.743595715542
230.828169985
230.912740487434
230.997307251322
231.08187030514
231.166429677367
231.25098539648
231.335537490956
231.420085989272
231.504630919907
231.589172311337
231.67371019204
231.758244590493
231.842775535175
231.927303054561
232.011827177131
232.09634793136
232.180865345727
232.265379448709
232.349890268784
232.434397834428
