# Supplementary material for: A miniDOAS instrument optimised for ammonia field measurements
Source: Copernicus journal article supplement (doi:10.5194/amt-9-2721-2016), 2016-06-29
Supplement: Supplementary file 2 [file amt-9-2721-2016-supplement.zip › miniDOAS_Revaluation_basic_20150513/2_Results/miniDOAS_20150519-20150519_Eval201605131125/css/scianimator.light.css]

/**
 * SciAnimator - Scientific Image Animator Plugin for jQuery
 *
 * Copyright (c) 2010 Brent Ertz
 * Released under the MIT license.
 * http://github.com/brentertz/scianimator
*/

/* Light theme */
.scianimator.light,
.scianimator.light a,
.scianimator.light a:visited {
	color: #555;
}
.scianimator.light {
	background: #ddd;
}
.scianimator.light .controls,
.scianimator.light .control {
	background-color: #ddd;
	border-color: #999;
	color: #555; 
	text-shadow: 0 1px #fff;	
}
.scianimator.light .controls {
	box-shadow: inset 0 1px 3px #fff, inset 0 -17px #ccc, 0 0 3px #999;
	-o-box-shadow: inset 0 1px 3px #fff, inset 0 -17px #ccc, 0 0 3px #999;
	-webkit-box-shadow: inset 0 1px 3px #fff, inset 0 -17px #ccc, 0 0 3px #999;
	-moz-box-shadow: inset 0 1px 3px #fff, inset 0 -17px #ccc, 0 0 3px #999;
}
.scianimator.light .control {
	box-shadow: inset 0 1px 3px #fff, inset 0 -10px #ccc, 0 0 3px #999;
	-o-box-shadow: inset 0 1px 3px #fff, inset 0 -10px #ccc, 0 0 3px #999;
	-webkit-box-shadow: inset 0 1px 3px #fff, inset 0 -10px #ccc, 0 0 3px #999;
	-moz-box-shadow: inset 0 1px 3px #fff, inset 0 -10px #ccc, 0 0 3px #999;
}
.scianimator.light a:hover {
	box-shadow: inset 0 1px 3px #fff, inset 0 -10px #ccc, 0 0 3px #555;
	-o-box-shadow: inset 0 1px 3px #fff, inset 0 -10px #ccc, 0 0 3px #555;
	-webkit-box-shadow: inset 0 1px 3px #fff, inset 0 -10px #ccc, 0 0 3px #555;	
	-moz-box-shadow: inset 0 1px 3px #fff, inset 0 -10px #ccc, 0 0 3px #555;
	color: #fff;
	text-shadow: 0px 1px #555;	
}
