# Supplementary material for: A miniDOAS instrument optimised for ammonia field measurements
Source: Copernicus journal article supplement (doi:10.5194/amt-9-2721-2016), 2016-06-29
Supplement: Supplementary file 2 [file amt-9-2721-2016-supplement.zip › miniDOAS_Revaluation_basic_20150513/2_Results/miniDOAS_20150519-20150519_Eval201605131125/js/Rplot_miniDOAS_20150519-20150519_Eval201605131125_avg1_.js]

(function($) {
    $(document).ready(function() {
	
	$('#Rplot_miniDOAS_20150519-20150519_Eval201605131125_avg1_').scianimator({
	    'images': ['images/Rplot_miniDOAS_20150519-20150519_Eval201605131125_avg1_1.png', 'images/Rplot_miniDOAS_20150519-20150519_Eval201605131125_avg1_2.png', 'images/Rplot_miniDOAS_20150519-20150519_Eval201605131125_avg1_3.png', 'images/Rplot_miniDOAS_20150519-20150519_Eval201605131125_avg1_4.png', 'images/Rplot_miniDOAS_20150519-20150519_Eval201605131125_avg1_5.png', 'images/Rplot_miniDOAS_20150519-20150519_Eval201605131125_avg1_6.png', 'images/Rplot_miniDOAS_20150519-20150519_Eval201605131125_avg1_7.png', 'images/Rplot_miniDOAS_20150519-20150519_Eval201605131125_avg1_8.png', 'images/Rplot_miniDOAS_20150519-20150519_Eval201605131125_avg1_9.png', 'images/Rplot_miniDOAS_20150519-20150519_Eval201605131125_avg1_10.png', 'images/Rplot_miniDOAS_20150519-20150519_Eval201605131125_avg1_11.png', 'images/Rplot_miniDOAS_20150519-20150519_Eval201605131125_avg1_12.png', 'images/Rplot_miniDOAS_20150519-20150519_Eval201605131125_avg1_13.png', 'images/Rplot_miniDOAS_20150519-20150519_Eval201605131125_avg1_14.png', 'images/Rplot_miniDOAS_20150519-20150519_Eval201605131125_avg1_15.png', 'images/Rplot_miniDOAS_20150519-20150519_Eval201605131125_avg1_16.png', 'images/Rplot_miniDOAS_20150519-20150519_Eval201605131125_avg1_17.png', 'images/Rplot_miniDOAS_20150519-20150519_Eval201605131125_avg1_18.png', 'images/Rplot_miniDOAS_20150519-20150519_Eval201605131125_avg1_19.png', 'images/Rplot_miniDOAS_20150519-20150519_Eval201605131125_avg1_20.png', 'images/Rplot_miniDOAS_20150519-20150519_Eval201605131125_avg1_21.png', 'images/Rplot_miniDOAS_20150519-20150519_Eval201605131125_avg1_22.png', 'images/Rplot_miniDOAS_20150519-20150519_Eval201605131125_avg1_23.png', 'images/Rplot_miniDOAS_20150519-20150519_Eval201605131125_avg1_24.png', 'images/Rplot_miniDOAS_20150519-20150519_Eval201605131125_avg1_25.png', 'images/Rplot_miniDOAS_20150519-20150519_Eval201605131125_avg1_26.png', 'images/Rplot_miniDOAS_20150519-20150519_Eval201605131125_avg1_27.png', 'images/Rplot_miniDOAS_20150519-20150519_Eval201605131125_avg1_28.png', 'images/Rplot_miniDOAS_20150519-20150519_Eval201605131125_avg1_29.png', 'images/Rplot_miniDOAS_20150519-20150519_Eval201605131125_avg1_30.png', 'images/Rplot_miniDOAS_20150519-20150519_Eval201605131125_avg1_31.png', 'images/Rplot_miniDOAS_20150519-20150519_Eval201605131125_avg1_32.png', 'images/Rplot_miniDOAS_20150519-20150519_Eval201605131125_avg1_33.png', 'images/Rplot_miniDOAS_20150519-20150519_Eval201605131125_avg1_34.png', 'images/Rplot_miniDOAS_20150519-20150519_Eval201605131125_avg1_35.png', 'images/Rplot_miniDOAS_20150519-20150519_Eval201605131125_avg1_36.png', 'images/Rplot_miniDOAS_20150519-20150519_Eval201605131125_avg1_37.png', 'images/Rplot_miniDOAS_20150519-20150519_Eval201605131125_avg1_38.png', 'images/Rplot_miniDOAS_20150519-20150519_Eval201605131125_avg1_39.png', 'images/Rplot_miniDOAS_20150519-20150519_Eval201605131125_avg1_40.png', 'images/Rplot_miniDOAS_20150519-20150519_Eval201605131125_avg1_41.png', 'images/Rplot_miniDOAS_20150519-20150519_Eval201605131125_avg1_42.png', 'images/Rplot_miniDOAS_20150519-20150519_Eval201605131125_avg1_43.png', 'images/Rplot_miniDOAS_20150519-20150519_Eval201605131125_avg1_44.png', 'images/Rplot_miniDOAS_20150519-20150519_Eval201605131125_avg1_45.png', 'images/Rplot_miniDOAS_20150519-20150519_Eval201605131125_avg1_46.png', 'images/Rplot_miniDOAS_20150519-20150519_Eval201605131125_avg1_47.png', 'images/Rplot_miniDOAS_20150519-20150519_Eval201605131125_avg1_48.png', 'images/Rplot_miniDOAS_20150519-20150519_Eval201605131125_avg1_49.png'],
	    'width': 480,
	    'delay': 300,
	    'loopMode': 'loop'
	});
    });
})(jQuery);
