# Supplementary material for: A miniDOAS instrument optimised for ammonia field measurements
Source: Copernicus journal article supplement (doi:10.5194/amt-9-2721-2016), 2016-06-29
Supplement: Supplementary file 2 [file amt-9-2721-2016-supplement.zip › miniDOAS_Revaluation_basic_20150513/2_Results/miniDOAS_20150519-20150519_Eval201605131125/miniDOAS_20150519-20150519_Eval201605131125.csv]

date_time_start	date_time_end	millisec_start	millisec_end	no_of_acc	tau_[pixel]	mult_GOF(tau)	mult_GOF(0)	NH3_[ug/m3]	NH3_se_[ug/m3]	NH3_part_R2(tau)	SO2_[ug/m3]	SO2_se_[ug/m3]	SO2_part_R2(tau)	NO_[ug/m3]	NO_se_[ug/m3]	NO_part_R2(tau)	Iadj_max	spectrum_average	Iadj/Iref_intercept	Iadj/Iref_slope	Iadj/Iref_R2	resid_SSE	FP_SSE	dark_avg_offset_[counts]	TEC_T_[degC]	panel_T_[degC]	ambient_T_[degC]	ambient_RH_[perc]	min_Iadj/Iref	fit_order
19.05.2015 00:00:00	19.05.2015 00:30:00	0	0	17721	0	2135.64323368799	2135.64323368799	2.54493343020833	0.0888670404014502	0.238711583989012	-0.277736826520909	0.231685453113078	0.0102893937260611	0.151691212687278	0.421096016191407	0.00309211251727459	41943.8176859821	18634.2579112413	1.13227223955627	-0.000337518420157628	0.0756442349089618	3.23379658564262e-06	2.86411488625648e-07	127.246027593614	-9.96625421822272	32.3	8.5	70.5	1.04356568743566	2/0/0
19.05.2015 00:30:00	19.05.2015 01:00:00	0	0	17940	0	2248.79516346216	2248.79516346216	2.21092433033856	0.0886193704542549	0.209404611508098	-0.17177673800505	0.181483567431603	0.00812439040906051	-0.218149279137425	0.353813359947444	0.00529238642389071	43613.0591567869	19356.4880865705	1.16106401322941	-0.000281713574075685	0.0560304475422011	1.42453392256962e-06	2.86411488625648e-07	131.206212884634	-9.97122222222222	31.3	8.3	70.9	1.08472975023833	2/0/0
19.05.2015 01:00:00	19.05.2015 01:30:00	0	0	17940	0	2351.38262299832	2351.38262299832	1.86929653980298	0.0600477264523818	0.258156568921832	-0.123879121389899	0.15959929750463	0.00666247475587198	-0.173275960336653	0.271809695214164	0.00547198556899508	43617.5654719086	19335.9596707342	1.12879734287744	-0.000139591237033379	0.0166601207694715	6.77822099311388e-07	2.86411488625648e-07	129.869826127032	-9.10311111111111	29.2	8.1	71.7	1.08347754077774	2/0/0
19.05.2015 01:30:00	19.05.2015 02:00:00	0	0	17940	1	2308.55117296389	2296.77496689711	1.57595002087126	0.226930589894171	0.0595055139062748	0.162689807263074	0.203200687741964	0.00687231392712427	-0.281576769377116	0.372936799708474	0.00648082860467971	43326.4288928124	19203.4231775992	1.10538958065224	-6.71024974965697e-05	0.0037742251417272	9.1857794529633e-07	2.86411488625648e-07	129.067818527262	-9.16566666666667	28.4	7.8	72.4	1.07486758822784	2/0/0
19.05.2015 02:00:00	19.05.2015 02:30:00	0	0	17940	0	2249.367367176	2249.367367176	1.99657301003443	0.093546486830567	0.180205124167214	-0.291145219001909	0.191181606449912	0.0130708709996224	-0.17032060296701	0.364208104918326	0.00401413667359454	43729.1690757706	19404.067188044	1.12978514234064	-0.000126409899807415	0.0100989625909874	1.41810144880939e-06	2.86411488625648e-07	131.690366763576	-9.30122222222222	29.5	7.7	73	1.08467407539205	2/0/0
19.05.2015 02:30:00	19.05.2015 03:00:00	0	0	17940	0	2143.13702741154	2143.13702741154	2.10443763546714	0.0947671188236361	0.187243430523768	-0.299283182200359	0.232186007702616	0.011063633024282	0.0947101302060527	0.432720698579305	0.00187873736204023	42637.3560199247	18957.3666021778	1.14344923853792	-0.000304685227041152	0.0479147996559655	3.06182604484384e-06	2.86411488625648e-07	129.2508616412	-7.97333333333333	31	7.8	73.8	1.0601496044166	2/0/0
19.05.2015 03:00:00	19.05.2015 03:30:00	0	0	17940	0	2104.87325766394	2104.87325766394	1.98410326701571	0.0917832203356086	0.182443397318345	-0.304756979790804	0.244526488603695	0.0106974674377199	0.23010219613125	0.438891173938378	0.00450025987007156	41257.7911765759	18361.6997162478	1.13141608583032	-0.000404249568730856	0.0809145413122902	4.04089993054639e-06	2.86411488625648e-07	125.612634854016	-9.30877777777778	32.3	8.1	73.9	1.02790148372097	2/0/0
19.05.2015 03:30:00	19.05.2015 04:00:00	0	0	17940	0	2150.61276612084	2150.61276612084	1.79316911734858	0.0960788966535172	0.158186178021695	-0.230139800171265	0.22172183505869	0.00890931070611869	0.0375986888248583	0.426733441971798	0.000756299775864936	42201.2264780166	18775.8666674839	1.16485831659879	-0.000449570213438737	0.101047624117972	2.90050579063319e-06	2.86411488625648e-07	127.84109812301	-9.96	32.2	8.2	72.7	1.05260520995934	2/0/0
19.05.2015 04:00:00	19.05.2015 04:30:00	0	0	17940	0	2346.14436952138	2346.14436952138	1.91015357985908	0.0952323681097843	0.169675220213514	-0.157904498884025	0.16302844999501	0.00831369656652747	-0.322275053887665	0.306864435602777	0.00901447751150181	43626.1831818213	19363.4446292247	1.14599520319812	-0.000211020880996849	0.0276807310620502	7.02652668566511e-07	2.86411488625648e-07	130.557707591026	-9.30666666666667	30.1	8	72.1	1.08377355638843	2/0/0
19.05.2015 04:30:00	19.05.2015 05:00:00	0	0	17940	0	2270.65341009336	2270.65341009336	2.16267021271643	0.093382428990064	0.194978615451917	-0.129425823402111	0.191555384908387	0.00579959066379176	-0.178775085232343	0.35961990128774	0.00426714496208395	42663.8359719931	18934.6224586349	1.10003120135336	-0.000112100019402038	0.00865624450624914	1.21508810867423e-06	2.86411488625648e-07	126.988231632675	-9.31455555555556	28.3	7.9	72.6	1.05849474340792	2/0/0
19.05.2015 05:00:00	19.05.2015 05:30:00	0	0	17940	0	2271.26948863722	2271.26948863722	2.19226747894333	0.0833939682198527	0.220116448706602	-0.148599508923859	0.184792926293132	0.00690239422600674	-0.126153873542718	0.340213126987238	0.00318291761668715	43086.6946883963	19146.4207136809	1.1219035121897	-0.000156668044667416	0.0157457070395017	1.21050268701018e-06	2.86411488625648e-07	129.563084737797	-9.64544444444445	28.9	8.4	72.7	1.0708279749803	2/0/0
19.05.2015 05:30:00	19.05.2015 06:00:00	0	0	17930	0	2299.87097871247	2299.87097871247	2.58424528372803	0.077403899253644	0.275492256824764	-0.395069945648317	0.186050227428893	0.0182242527625174	0.0279766542631528	0.314081672271119	0.000764594428120345	43329.5766976497	19247.3106421383	1.11387875677917	-9.35376984398277e-05	0.00658423968916775	9.83333417179277e-07	2.86411488625648e-07	132.059757456462	-7.98554752640356	30.7	9.5	72.2	1.07661600773728	2/0/0
19.05.2015 06:00:00	19.05.2015 06:30:00	0	0	17940	0	2298.76589991226	2298.76589991226	3.00733877583921	0.0613146633474312	0.388026409750127	-0.450722093350536	0.186834656554118	0.0207031481306652	0.318911414762328	0.273679206199938	0.0100019484738051	43379.7812386293	19246.5384200088	1.09786164903603	-2.03440423356051e-05	0.000447274647166285	9.91689692119599e-07	2.86411488625648e-07	133.635908055902	-9.63333333333333	32.5	10.7	70.2	1.07757641132412	2/0/0
19.05.2015 06:30:00	19.05.2015 07:00:00	0	0	17940	-1	2227.0968925418	2225.14045953321	2.77443025624048	0.0597668004673659	0.370162320242766	-0.0435088946601725	0.162712567473704	0.00229527054146394	0.0501025221968117	0.276768802534227	0.00155388904383452	41944.0262655264	18570.9405313949	1.05324528139734	8.49827247127802e-06	0.000243246442223411	1.67157109758643e-06	2.86411488625648e-07	128.526022744661	-9.1065	33.2	11.8	65.7	1.04527465424814	2/0/0
19.05.2015 07:00:00	19.05.2015 07:30:00	0	0	17940	0	2160.37607638256	2160.37607638256	3.08918425974103	0.0541846767836071	0.439565457618104	-0.0570159201994145	0.163476910364783	0.00299375216682884	-0.0631197205651094	0.267961699726952	0.00202194589594555	40668.7636496027	17964.5487319558	1.01591328425631	2.15469079370283e-05	0.00453477637880917	2.71219885150932e-06	2.86411488625648e-07	122.386854265489	-9.64333333333333	31.3	12.6	62.4	1.01471641545387	2/0/0
19.05.2015 07:30:00	19.05.2015 08:00:00	0	0	17940	0	2225.71872247958	2225.71872247958	3.00849600463727	0.0439073228147323	0.50696763387025	-0.170432014011277	0.140285922152259	0.0104277724546599	0.017813857031125	0.217126108236979	0.000704245176548143	41777.0094753965	18448.0353090827	1.01721607251307	0.00014144541015228	0.109978404409642	1.690789249529e-06	2.86411488625648e-07	126.835068110113	-9.50144444444445	29.8	13	59.8	1.04066184876699	2/0/0
19.05.2015 08:00:00	19.05.2015 08:30:00	0	0	17940	0	2125.51072796551	2125.51072796551	3.24561842781697	0.0555680782517422	0.448186330588299	-0.100290252756446	0.175711364605496	0.00489927408791646	0.0532293911568126	0.276109940418894	0.00165480542630834	40316.0423388091	17776.294077799	0.954078693055766	0.000255496797290947	0.233040658189208	3.4896083684514e-06	2.86411488625648e-07	121.945263186657	-9.32	29.1	13.5	57	1.00126789500398	2/0/0
19.05.2015 08:30:00	19.05.2015 09:00:00	0	0	17940	0	2236.05200124536	2236.05200124536	3.09012868573481	0.0463142260323792	0.496981674310162	-0.1897022410485	0.14001083227146	0.0116294594535984	0.0590137958561663	0.225188475167458	0.00224949154705508	42103.5849731677	18537.2994971079	0.945671715907061	0.000491189586123823	0.522503531526485	1.5687758333515e-06	2.86411488625648e-07	127.967140368039	-9.44188888888889	29.2	13.5	56.2	1.04236043183724	2/0/0
19.05.2015 09:00:00	19.05.2015 09:30:00	0	0	17940	0	2246.22339781436	2246.22339781436	3.76776712939946	0.0520211023871775	0.527983629837928	-0.257575106094241	0.15380354003512	0.0143737723382376	0.0712998531625879	0.247193930809268	0.00247586850482442	42461.8982341954	18730.0292958941	1.00534700717859	0.000268590411822461	0.295832436354882	1.45599343423954e-06	2.86411488625648e-07	129.889042496411	-9.84683333333333	30.3	14.2	53.2	1.05521183528038	2/0/0
19.05.2015 09:30:00	19.05.2015 10:00:00	0	0	17940	0	2294.08657102592	2294.08657102592	2.86340411155181	0.0493795395064069	0.445603438544684	-0.38410536319948	0.138435017041725	0.0238099974037443	0.024409276757011	0.227509002297227	0.000920946106078311	37782.7542612513	16637.2688460034	0.872367058980525	0.000332650227402522	0.458120084954612	1.02981765538003e-06	2.86411488625648e-07	115.802335107584	-9.32666666666667	31.7	14.4	52.2	0.937552687212522	2/0/0
19.05.2015 10:00:00	19.05.2015 10:30:00	0	0	17940	0	2254.07900692451	2254.07900692451	1.75743724967003	0.0507062330187652	0.285154553537395	-0.10396070429394	0.131325869407729	0.00679496112907408	0.0242865742867497	0.236145490643131	0.000882804439860123	41356.0157786788	18134.4854320256	0.919299245196727	0.000505812869626899	0.418012507499635	1.37692931782208e-06	2.86411488625648e-07	124.763580553552	-8.96461111111111	31.2	12.2	63.9	1.02282303894393	2/0/0
19.05.2015 10:30:00	19.05.2015 11:00:00	0	0	17940	0	2077.55502351893	2077.55502351893	3.28123574602921	0.0706371778851071	0.370375882843236	-0.0883867616265988	0.213730465644546	0.00354973660125892	-0.00370009032043468	0.349985526866673	9.07486792532753e-05	38262.1523726054	16818.7101618087	0.866512922344813	0.00040575917221767	0.491130167514059	4.93298644059455e-06	2.86411488625648e-07	114.357378024788	-9.62205555555556	30	12.9	64.3	0.946299070575274	2/0/0
19.05.2015 11:00:00	19.05.2015 11:30:00	0	0	17940	0	2163.39839300435	2163.39839300435	4.60748365174321	0.0608849405898293	0.544740147857947	-0.135580587327832	0.180629212333579	0.00644285835037724	-0.103361039610008	0.29615960805109	0.00299576103600225	41076.2387501678	18092.67971938	0.944528711668943	0.000380454172118479	0.474441593204812	2.65099138790789e-06	2.86411488625648e-07	124.186069815143	-9.96461111111111	30	15	56.1	1.01519015439426	2/0/0
19.05.2015 11:30:00	19.05.2015 12:00:00	0	0	17940	0	2215.76615994004	2215.76615994004	4.9950882839651	0.0609800857984767	0.57517734760233	-0.217971263585804	0.177447234109874	0.0105434791001519	-0.142594435804776	0.287260025417842	0.00426090171655732	41876.2391002822	18436.9923227791	0.95737319812783	0.000411311778239844	0.41783181696584	1.81356033057148e-06	2.86411488625648e-07	127.396524307605	-8.98538888888889	30.8	15.9	52.1	1.03495990597417	2/0/0
19.05.2015 12:00:00	19.05.2015 12:30:00	0	0	17940	0	2348.4209066717	2348.4209066717	2.16205742778718	0.0316056168199095	0.506352368266077	-0.192717412814853	0.0951195920264327	0.0173885506779774	0.00513904747309574	0.152652436301203	0.000288972786677874	42239.1485877616	18567.8538637733	0.97607009250919	0.000359740412492109	0.30989035375704	6.96875594317026e-07	2.86411488625648e-07	128.692596964464	-8.96127777777778	31.4	15.4	52.4	1.04747802609769	2/0/0
19.05.2015 12:30:00	19.05.2015 13:00:00	0	0	17940	0	2236.53791916602	2236.53791916602	3.0794049347241	0.0464755462435053	0.49438182799739	-0.0139325611953507	0.134201340897387	0.000891152451485549	0.0578246541558989	0.224096566277326	0.00221490371259096	40369.4280042897	17684.1754556373	0.875467494511706	0.000589168640167364	0.444299932623888	1.56386113623261e-06	2.86411488625648e-07	121.434558404558	-9.29872222222222	30.4	13.7	60.5	0.994836068762544	2/0/0
19.05.2015 13:00:00	19.05.2015 13:30:00	0	0	17940	0	2417.10067435051	2417.10067435051	4.01468197531519	0.0431550509278757	0.623999942485429	-0.102164868211058	0.103459970709481	0.0084760147046357	-0.203165055700612	0.181169776971353	0.00962545386820685	41968.1937550508	18470.6010625997	1.00095177292361	0.000220484338468777	0.167613930056226	4.22636957062893e-07	2.86411488625648e-07	125.972617894798	-9.95794444444445	29.9	15.5	53.3	1.04150658688863	2/0/0
19.05.2015 13:30:00	19.05.2015 14:00:00	0	0	17940	0	2356.38713446906	2356.38713446906	2.0523263967421	0.0462847562465132	0.35572040597653	0.00782810249828636	0.11338251795451	0.000592636511663271	0.035942795880383	0.20765523219789	0.00148575285473189	39713.3242965977	17419.9229552233	0.902944268736927	0.000394820346773421	0.360764933890339	6.5622627172548e-07	2.86411488625648e-07	118.421268143266	-9.63872222222222	29.6	12.7	64.6	0.98324411858901	2/0/0
19.05.2015 14:00:00	19.05.2015 14:30:00	0	0	17930	0	2143.03076795954	2143.03076795954	3.43523206203942	0.0561497119831974	0.464940731899378	-0.0355010101839278	0.169711775808659	0.00179558557465314	0.102832576149868	0.276612592237916	0.00319105751971848	39822.7179658347	17498.1841310657	0.889515344295054	0.000476860366182006	0.598430468281656	3.07444610142965e-06	2.86411488625648e-07	118.859355784399	-8.96942745969983	29.9	14.7	62.4	0.982617729056978	2/0/0
19.05.2015 14:30:00	19.05.2015 15:00:00	0	0	17950	0	2159.25362377531	2159.25362377531	3.65055027179777	0.0510868189147681	0.522855653593853	-0.0692437389594299	0.159401633282342	0.00372874598585751	-0.108744325646361	0.253470173001157	0.0036826027473343	40337.628381931	17736.8560730984	0.918288598859447	0.000407690909768637	0.470209383001495	2.73463822520982e-06	2.86411488625648e-07	121.734937102219	-9.97334813992227	31.3	15.3	53.1	0.99801314906231	2/0/0
19.05.2015 15:00:00	19.05.2015 15:30:00	0	0	17930	1	2448.09629228387	2422.94141187571	0.171633121294818	0.0262310109381485	0.0560764144964724	0.0923610541529882	0.0557092731523142	0.0142296916762196	-0.0645683805275804	0.11190945901649	0.0049525155276182	42910.875948913	18862.9769902935	1.02540144863201	0.000210465613648865	0.136888888422694	3.39176567154617e-07	2.86411488625648e-07	129.288575384216	-7.97354085603113	31.7	13.6	54.7	1.06577222513234	2/0/0
19.05.2015 15:30:00	19.05.2015 16:00:00	0	0	17928	0	1695.9221908208	1695.9221908208	2.233966995404	0.0710459134706297	0.260583046700422	-0.485649283042569	0.245873217755597	0.0169522437814831	0.417256938877514	0.363503713374864	0.00985261947633979	17818.0098995321	7858.54963790921	0.450719757198403	-1.9874247101779e-05	0.0103516875903065	7.79987239612766e-05	2.86411488625648e-07	208.85801620556	10.4046666666667	30.3	11.9	61	0.443708789189948	1/0/0
19.05.2015 16:00:00	19.05.2015 16:30:00	0	0	17940	0	2441.0122460598	2441.0122460598	1.47849237102907	0.0355483626410174	0.336223489619834	-0.0435487358390847	0.072868014384912	0.00512992454391978	0.0647287024736795	0.145497988471174	0.00381869366011067	42993.4977938327	18941.7076932262	1.01621666862163	0.000272346896587578	0.330617972858011	3.5615213090357e-07	2.86411488625648e-07	132.35859007148	-9.64333333333333	29.8	11.6	64.3	1.0667911525713	2/0/0
19.05.2015 16:30:00	19.05.2015 17:00:00	0	0	17940	0	2348.95771439883	2348.95771439883	1.97481737678016	0.0361387349782755	0.424666903049045	-0.145934627005775	0.103255500815801	0.0121308511070051	0.292758265999816	0.170333115303466	0.0147516599393187	43309.2947690438	19105.2868068359	1.02822045621875	0.000260243137824322	0.324588251638906	6.93590158836498e-07	2.86411488625648e-07	136.236212319933	-8.97	32	13.3	61.9	1.07388215770687	2/0/0
19.05.2015 17:00:00	19.05.2015 17:30:00	0	0	17940	1	2276.15412059477	2245.96920739299	0.440908585563579	0.0369932410969708	0.101775501481879	-0.018420087463374	0.108144963187896	0.00146205261270084	0.120555150900368	0.179394550821383	0.00576829380926768	42501.3511246325	18786.1428915433	1.0859122433256	-8.5583899011833e-05	0.216018675296454	1.17551712887403e-06	2.86411488625648e-07	135.986723282401	13.81	34.5	14.8	49.6	1.06521566884863	2/0/0
19.05.2015 17:30:00	19.05.2015 18:00:00	0	0	17940	1	2435.57430771335	2394.52960323241	0.220700161800686	0.0219308096580152	0.0860620595508334	0.0867955655271348	0.0481599083964073	0.0154681365734508	0.0352047252483693	0.0966780812998671	0.00312571149233685	42986.7564464649	18951.3675296749	1.06160212666662	6.82116183347329e-05	0.0727413114888425	3.71872757376027e-07	2.86411488625648e-07	137.383389293287	-9.3	33.9	14.5	49.8	1.07382263730583	1/0/0
19.05.2015 18:00:00	19.05.2015 18:30:00	0	0	17934	0	2389.01567252477	2389.01567252477	0.896193946289217	0.0288695484961266	0.257480669491996	0.137618959900431	0.069350747482045	0.0170310806276797	-0.181240812684352	0.134009836949025	0.0116082869095887	42086.1368245902	18495.8008320674	0.979759900758226	0.000323404187285384	0.404710004736272	5.20160372374809e-07	2.86411488625648e-07	130.873814981249	-9.95331802776867	31.4	13.2	54.5	1.04586739510998	2/0/0
19.05.2015 18:30:00	19.05.2015 19:00:00	0	0	17936	-1	1998.36276658473	1991.35022742425	0.265238755694878	0.127002245614644	0.0179239565545713	2.51091287616515	0.563109079353415	0.0382471697172999	-1.09209878404247	0.600391409916566	0.0156117862626405	37490.7750931476	15566.7463006955	-1.0277678569296	0.00871727670646918	0.803447930426044	8.62715898423684e-06	2.86411488625648e-07	2011.07052669891	-8.31628330676384	28.8	12.5	57.4	0.673373887680287	2/0/0
19.05.2015 19:00:00	19.05.2015 19:30:00	0	0	17940	-1	2111.60456050973	2110.40195523466	0.772612668622543	0.06253739310875	0.105456099852908	0.0495603493223196	0.194591808697935	0.00218618465032854	-0.215753640474829	0.307654846448103	0.00601955764293506	38172.0014352047	16757.0328837285	0.850506093195163	0.000462371990910559	0.595932809176219	3.85817836059388e-06	2.86411488625648e-07	117.599481113516	-8.95472222222222	27.6	11.8	58.8	0.945587138391754	2/0/0
19.05.2015 19:30:00	19.05.2015 20:00:00	0	0	17940	0	2237.23868756706	2237.23868756706	1.79494435676798	0.0807580922364494	0.187404312723028	1.99807645464721	0.163253520502901	0.104482624608121	-0.825642467200607	0.315207410660675	0.0224783242308469	40488.7510910314	17757.4314575547	0.858881526832889	0.00068342862146252	0.759084897867338	1.54967732510935e-06	2.86411488625648e-07	120.771056526475	-9.29861111111111	27.2	10.8	61.8	0.995778067272802	2/0/0
19.05.2015 20:00:00	19.05.2015 20:30:00	0	0	17940	0	2318.67006377383	2318.67006377383	2.34345559436488	0.0500526564657363	0.372902321735633	0.756973816534107	0.146697260042346	0.0442498017183718	-0.232962756530494	0.245754250649476	0.00813671596019346	42964.7650564258	18883.529938783	0.938019377721139	0.00061394611292544	0.603113593977438	8.61286510158834e-07	2.86411488625648e-07	130.004874454427	-9.29333333333333	28.7	10.4	63.9	1.05561479101777	2/0/0
19.05.2015 20:30:00	19.05.2015 21:00:00	0	0	17940	0	2152.9601553152	2152.9601553152	2.68310825295735	0.057774435722983	0.370301118775789	0.148111838821351	0.190707246709461	0.00666639436481468	0.180190043729722	0.291006821788507	0.00531495462402884	42280.0998031087	18601.6613984034	0.945347079820895	0.000507162145348492	0.404722847613903	2.85776250692638e-06	2.86411488625648e-07	129.158957782295	-8.64333333333333	30.8	10.3	65.1	1.03820353352951	2/0/0
19.05.2015 21:00:00	19.05.2015 21:30:00	0	0	17940	0	2039.17228649601	2039.17228649601	3.8227304173633	0.0823882466916858	0.370011265474302	-0.457272545779555	0.263418083638813	0.0148990784823013	0.392662167055382	0.412221180798178	0.00817621520065698	38437.2935836736	16946.8054835876	0.893488746987469	0.000314637524279415	0.14955680421432	6.50379184363344e-06	2.86411488625648e-07	118.293408265387	-9.77083333333333	32.6	9.9	67.5	0.942784662436465	2/0/0
19.05.2015 21:30:00	19.05.2015 22:00:00	0	0	17940	0	2037.18111985914	2037.18111985914	3.62616434709705	0.0813342378775939	0.357415714413046	-0.363915436173497	0.261395201163844	0.0119495054815277	0.453713132787397	0.408377621572651	0.00953625248213074	37687.4905233785	16627.4470061159	0.905191225660221	0.000178267676217544	0.0512928139555931	6.59875782039074e-06	2.86411488625648e-07	115.723781386393	-9.80916666666667	33.2	9.7	68.1	0.9266920742179	2/0/0
19.05.2015 22:00:00	19.05.2015 22:30:00	0	0	17940	0	2109.08482182355	2109.08482182355	4.0277998593234	0.0868719832730726	0.369775812876492	-0.160761267720263	0.24553760047306	0.00561997819941555	0.239576452250008	0.43016193109739	0.00478063149127678	41558.0197477988	18323.7242088162	0.986144900694485	0.0002484708394047	0.0793898316821973	3.91978006297099e-06	2.86411488625648e-07	125.746171652422	-9.30138888888889	31.1	8.9	69.1	1.02002885094255	2/0/0
19.05.2015 22:30:00	19.05.2015 23:00:00	0	0	17940	0	2211.1801709473	2211.1801709473	3.99949738736799	0.0860319416386456	0.37062730066301	-0.0765586417822152	0.221938814869176	0.00296099127806036	-0.0689321749737366	0.407334457363452	0.00145260805618336	43018.4481792388	18946.8832306079	0.984335198162322	0.000418388108717186	0.19337278001122	1.86970368336687e-06	2.86411488625648e-07	128.995145674398	-9.30527777777778	28.5	8.3	70.9	1.05295955452529	2/0/0
19.05.2015 23:00:00	19.05.2015 23:30:00	0	0	17940	0	2228.50969311198	2228.50969311198	3.77483619955564	0.080127340023468	0.374892821993199	-0.21165306225307	0.222171023723209	0.00817712608998547	0.0298762463829788	0.381073553895128	0.000672969215598164	43055.8806087636	18976.0481758953	0.980694919314769	0.000442720953837591	0.193511350217282	1.64884563266978e-06	2.86411488625648e-07	129.377725725184	-9.97	27.6	7.8	73.2	1.05382373617515	2/0/0
19.05.2015 23:30:00	20.05.2015 00:00:00	0	0	17930	0	2090.7103201043	2090.7103201043	3.58563793732154	0.0868883119981853	0.333898690204765	-0.381237152285876	0.259929685109405	0.0125887611938604	0.325528094834014	0.428549728577807	0.00652012760019886	41746.8104790925	18451.9683821769	1.00361171642177	0.000202259409255567	0.0382099220070498	4.47661816558582e-06	2.86411488625648e-07	126.548361999954	-8.96753752084491	29	7.8	73.3	1.02600102834239	2/0/0
20.05.2015 00:00:00	20.05.2015 00:30:00	0	0	259	0	1970.40778599661	1970.40778599661	3.19965172580165	0.094471588277854	0.279164890471558	-0.323531898493851	0.274396857393575	0.0101203097725048	0.339225181046908	0.472899973670794	0.00615727619371219	40383.1926459783	17870.5344927307	0.997966252694682	7.72564383675851e-05	0.0056890438332505	1.07038079350624e-05	2.86411488625648e-07	122.88493507771	-9.9	29.8	7.8	73.6	0.995210316582943	2/0/0
