# Supplementary material for: A miniDOAS instrument optimised for ammonia field measurements
Source: Copernicus journal article supplement (doi:10.5194/amt-9-2721-2016), 2016-06-29
Supplement: Supplementary file 2 [file amt-9-2721-2016-supplement.zip › miniDOAS_Revaluation_basic_20150513/2_Results/miniDOAS_20150519-20150519_Eval201605131125/miniDOAS_20150519-20150519_Eval201605131125_log.txt]

miniDOAS evaluation program version: v5.0 (15.02.2016)
*****************************************************************************
calculation performed on: 2016-05-13 11:25:19
raw data file: /Users/Sinti/ownCloud/Arbeit/Programming/R/Projects/DOAS/miniDOAS_Revaluation_basic_version/0_Measurement_Data/20150519.csv
results saved at: /Users/Sinti/ownCloud/Arbeit/Programming/R/Projects/DOAS/miniDOAS_Revaluation_basic_version/2_Results/miniDOAS_20150519-20150519_Eval201605131125

reference files directory: /Users/Sinti/ownCloud/Arbeit/Programming/R/Projects/DOAS/miniDOAS_Revaluation_basic_version/1_Reference_Spectra/miniDOAS-ref_cal_spec-Eval201602170000
Iref spectrum recorded on: 201505181200-201505181659
NH3 calibration conditions: NH3 conc = 275.04ppm @ 293 K and 1000 mbar
SO2 calibration conditions: SO2 conc = 29.04ppm @ 293 K and 1000 mbar
NO calibration conditions: NO conc = 482.35ppm @ 293 K and 1000 mbar
in a cuvette of 0.075 m length

total light path = 75.8 m
spectrometer: QE65000 serial-QEPB0591, grating-2400
17574 spectra were accumulated on average over 1800 seconds for one data file

files evaluated from 19.05.2015 00:00:00 to 20.05.2015 00:30:00
spectra were evaluated over 202.2 to 230.1 nm
... using a loess-smoothed rfbaseline ('rfbaseline.smooth') filter with width of 0.13
spectra were allowed to be shifted at max. +/- 1 pixel with a resolution of 1 pixel
a pre-evaluated fixed residual pattern calculated by runmed over 145 datapoints was not substracted
fitting was performed with arima setting
(potential) stray-light mapping from nominal 150 to 160 nm
