# Supplementary material for: A miniDOAS instrument optimised for ammonia field measurements
Source: Copernicus journal article supplement (doi:10.5194/amt-9-2721-2016), 2016-06-29
Supplement: Supplementary file 2 [file amt-9-2721-2016-supplement.zip › miniDOAS_Revaluation_basic_20150513/miniDOAS_Revaluation/miniDOAS_cleanupalittle.R]

### remove some of the largest objects
### ******************************************************************************
rm(list=c("dat.meas","I.meas","meas.diffspec","meas.diffspec.broadband","meas.broadband","meas.doascurve",
	"avg.meas.doascurve","avg.fitted.doascurve.best","avg.fitted.NH3","avg.fitted.NO","avg.fitted.SO2",
	"residual","residual.best","dyn.fixed.pattern","fitted.doascurve.best","fitcurves.best","diffspec.fit","firstfile",
	"results.step1","results.step2","dummy1","dummy2","l.I.meas","fp.avg","spectrometer","concentrations",
	"partcorr","coeffs","dark.offset","board.Temp","datetime.start","datetime.end"))
