# Supplementary material for: A miniDOAS instrument optimised for ammonia field measurements
Source: Copernicus journal article supplement (doi:10.5194/amt-9-2721-2016), 2016-06-29
Supplement: Supplementary file 2 [file amt-9-2721-2016-supplement.zip › miniDOAS_Revaluation_basic_20150513/miniDOAS_Revaluation/miniDOAS_packages.R]

### packages
### ******************************************************************************
cat("initialise")
require(animation)
require(data.table)
require(dplyr)
require(IDPmisc)
require(lubridate)
require(MASS)
require(parallel)
require(rowr)
