# Supplementary material for: A miniDOAS instrument optimised for ammonia field measurements
Source: Copernicus journal article supplement (doi:10.5194/amt-9-2721-2016), 2016-06-29
Supplement: Supplementary file 2 [file amt-9-2721-2016-supplement.zip › miniDOAS_Revaluation_basic_20150513/miniDOAS_Revaluation/miniDOAS_rawdata_structure.R]

### data structure in daily *.csv filess
cat("\ndetermine data structure parameters")
n.line <<- 10                                                                                                     ### spectra summation time resolution in seconds (effective data recording time)
TEC.line <<- 7
starttime.line <<- 5
endtime.line <<- 6
spec.line <<- 2
res.line <<- 11
header.rows <<- 13                                                                                                            # resolution [nm/pixel]
board.Temp.line <<- 8
integr.line <<- 9
split.date.char <- "_"
split.date.format <- "%y%m%d%H%M%OS"
