# Supplementary material for: A miniDOAS instrument optimised for ammonia field measurements
Source: Copernicus journal article supplement (doi:10.5194/amt-9-2721-2016), 2016-06-29
Supplement: Supplementary file 2 [file amt-9-2721-2016-supplement.zip › Supplement_30052016_DOAS-Sintermann.pdf]

## Supplement

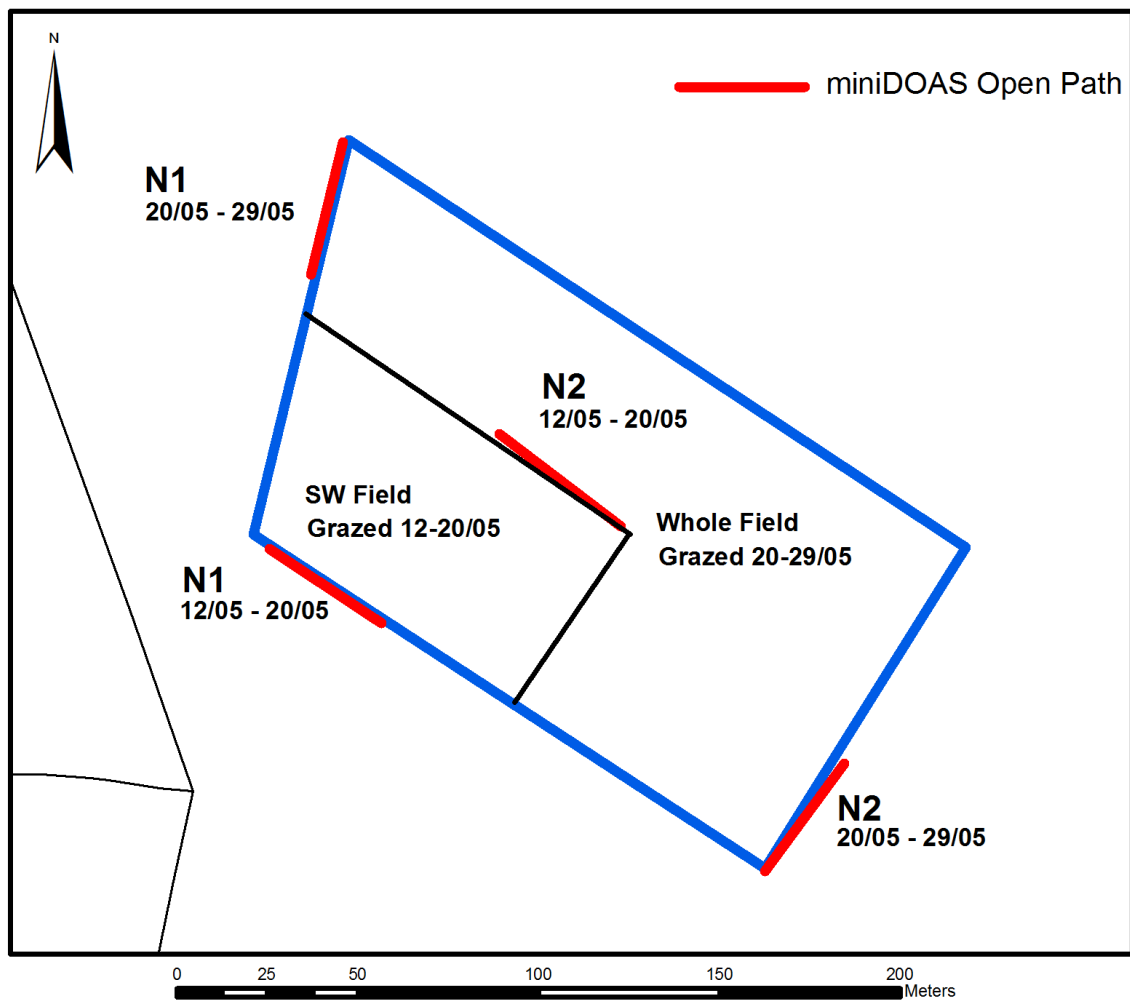

Figure S1: Outline experiment E4.

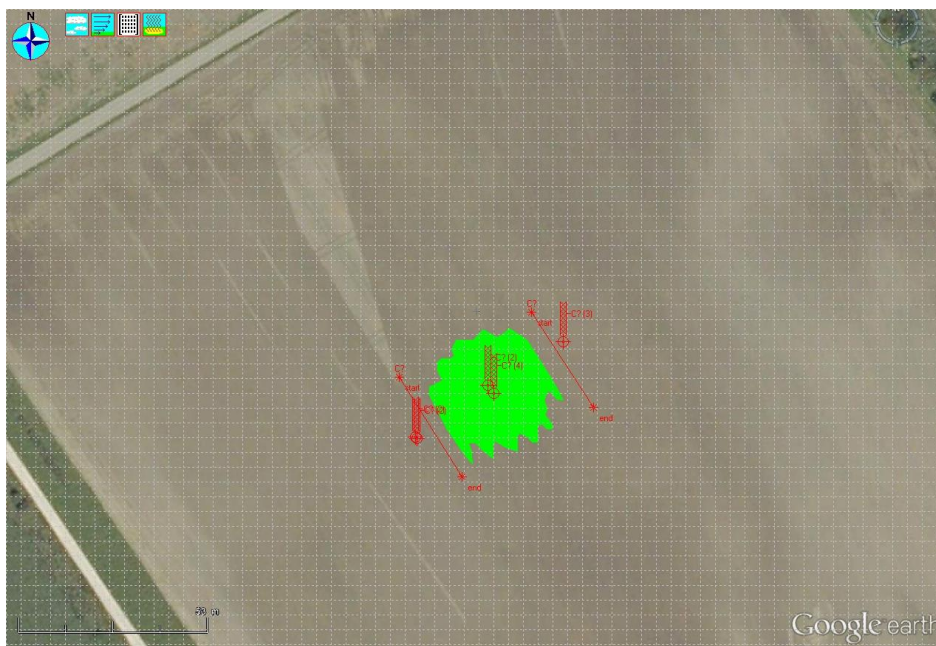

Figure S2: Overview over experiment E1; green = emission area, red lines = miniDOAS, red tower symbols = impingers.

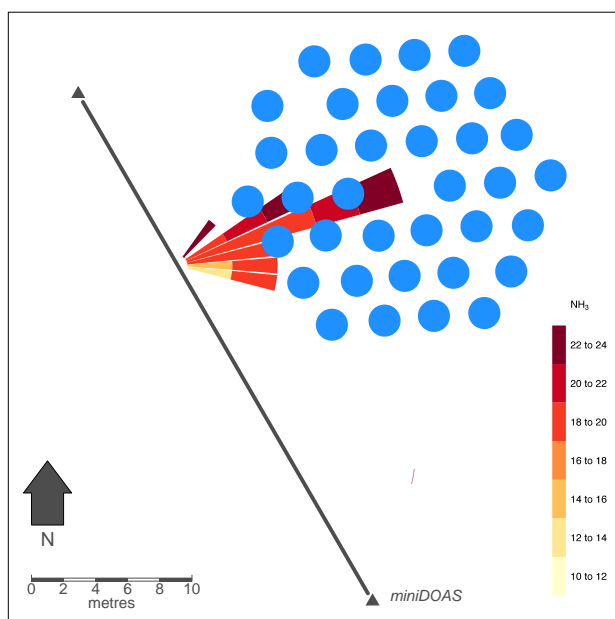

Figure S3: Setup and concentration differences from artificial gas release experiment E2.

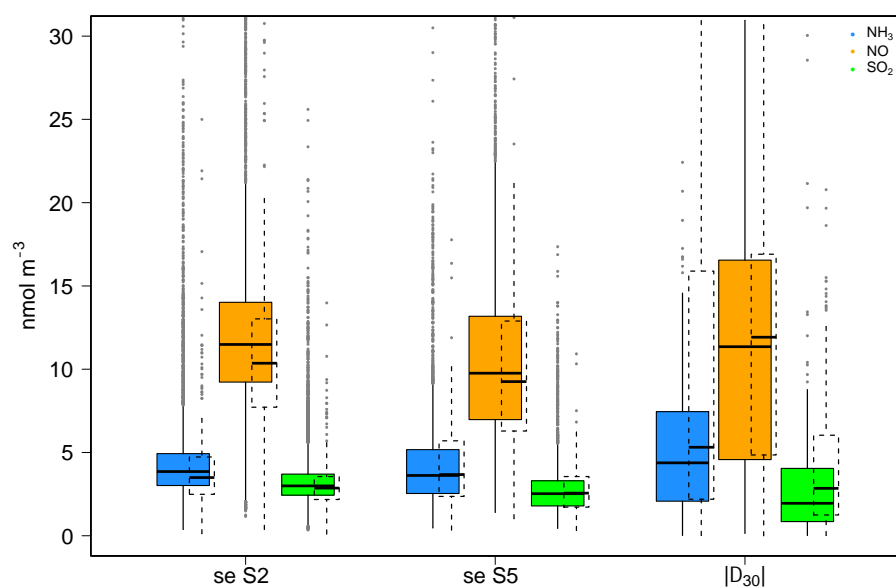

Figure S4: Concentration standard errors  $se_i$  for all three gases; ranges of  $se_i$  (1 min spectra) obtained from the E3 inter-comparison experiment (Table 1), including the concentration differences between instrument N1 and N2 for half hourly means ( $|\Delta_{30}| = |N1 - N2|$ ) of the individual 1 min values; in addition, the respective ranges for 30 min averaged spectra are shown (dashed boxplots).

Table S1: Using calibration cuvettes to test two miniDOAS systems (N1 and N2) for NH<sub>3</sub>-NO-SO<sub>2</sub> cross interference; both tests were performed indoors over path lengths of 21.4 and 31.4 m for N1 and N2, respectively; se<sub>i</sub> = concentration calculation standard error, concentrations are given in ug m<sup>-3</sup>.

| miniDOAS | cuvette gas     | $\hat{c}_{NH3}$ | se <sub>NH3</sub> | $\hat{c}_{SO2}$ | se <sub>SO2</sub> | $\hat{c}_{NO}$ | se <sub>NO</sub> |
|----------|-----------------|-----------------|-------------------|-----------------|-------------------|----------------|------------------|
| N1       | N <sub>2</sub>  | 0.07            | 0.03              | 0.04            | 0.11              | 0.12           | 0.18             |
| N1       | NH <sub>3</sub> | 645             | 5.9               | -0.09           | 20.8              | -15.8          | 13.6             |
| N1       | NO              | 21.6            | 5.1               | -13.1           | 20.2              | 2031           | 33.8             |
| N1       | SO <sub>2</sub> | 0.5             | 0.8               | 239             | 3.7               | -8.4           | 4.6              |
| N2       | N <sub>2</sub>  | 0.08            | 0.04              | 0.21            | 0.12              | -0.02          | 0.18             |
| N2       | NH <sub>3</sub> | 446             | 0.6               | -0.8            | 1.9               | -4.3           | 2.6              |
| N2       | NO              | -1.5            | 0.6               | 0.5             | 2.8               | 1346           | 3.3              |
| N2       | SO <sub>2</sub> | -1.5            | 0.5               | 173.3           | 0.9               | -25.8          | 1.8              |
