# Supplementary figures and images for: A miniDOAS instrument optimised for ammonia field measurements
Source: Copernicus journal article supplement (doi:10.5194/amt-9-2721-2016), 2016-06-29

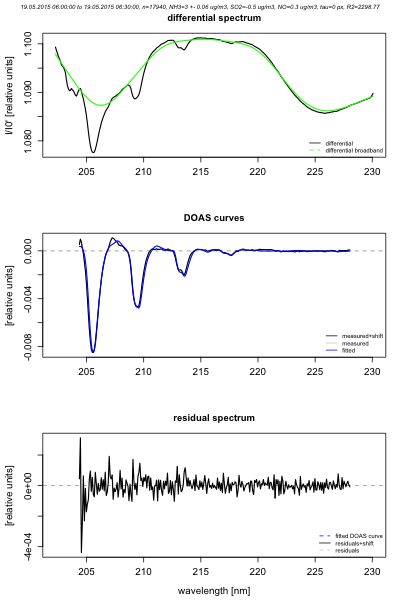

Supplement: Supplementary file 2 [file amt-9-2721-2016-supplement.zip › miniDOAS_Revaluation_basic_20150513/2_Results/miniDOAS_20150519-20150519_Eval201605131125/images/Rplot_miniDOAS_20150519-20150519_Eval201605131125_avg1_13.png]

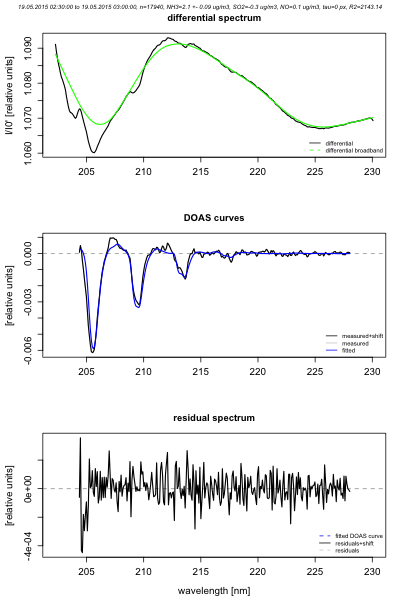

Supplement: Supplementary file 2 [file amt-9-2721-2016-supplement.zip › miniDOAS_Revaluation_basic_20150513/2_Results/miniDOAS_20150519-20150519_Eval201605131125/images/Rplot_miniDOAS_20150519-20150519_Eval201605131125_avg1_6.png]

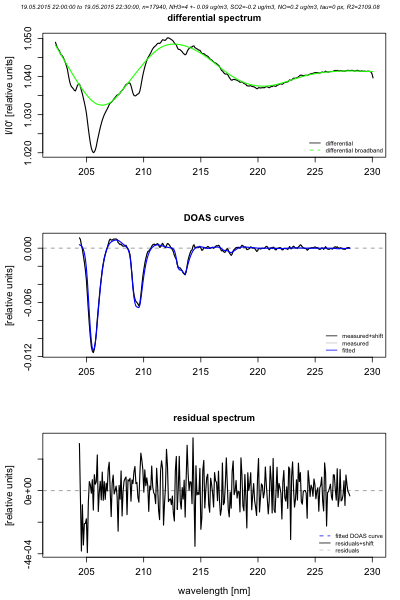

Supplement: Supplementary file 2 [file amt-9-2721-2016-supplement.zip › miniDOAS_Revaluation_basic_20150513/2_Results/miniDOAS_20150519-20150519_Eval201605131125/images/Rplot_miniDOAS_20150519-20150519_Eval201605131125_avg1_45.png]

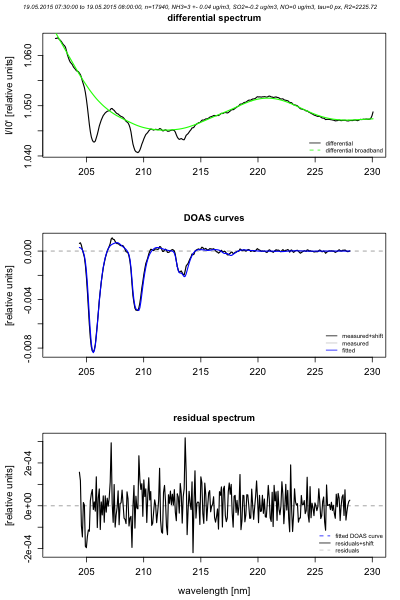

Supplement: Supplementary file 2 [file amt-9-2721-2016-supplement.zip › miniDOAS_Revaluation_basic_20150513/2_Results/miniDOAS_20150519-20150519_Eval201605131125/images/Rplot_miniDOAS_20150519-20150519_Eval201605131125_avg1_16.png]

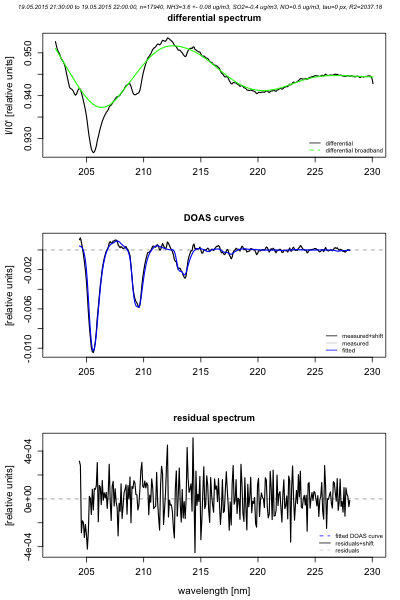

Supplement: Supplementary file 2 [file amt-9-2721-2016-supplement.zip › miniDOAS_Revaluation_basic_20150513/2_Results/miniDOAS_20150519-20150519_Eval201605131125/images/Rplot_miniDOAS_20150519-20150519_Eval201605131125_avg1_44.png]

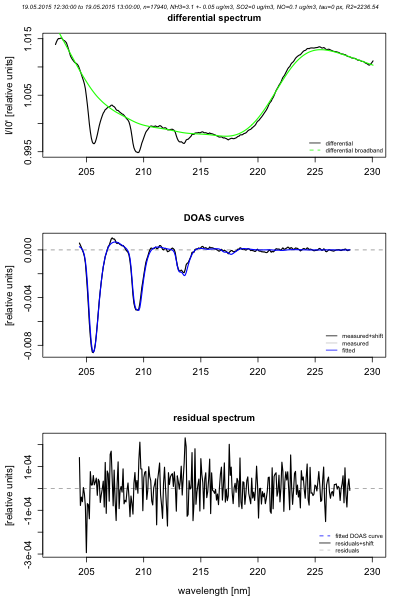

Supplement: Supplementary file 2 [file amt-9-2721-2016-supplement.zip › miniDOAS_Revaluation_basic_20150513/2_Results/miniDOAS_20150519-20150519_Eval201605131125/images/Rplot_miniDOAS_20150519-20150519_Eval201605131125_avg1_26.png]

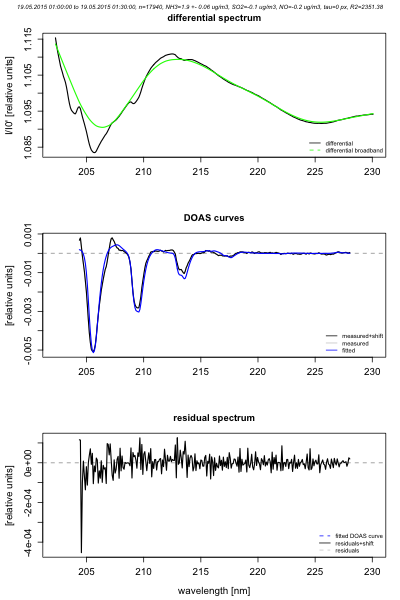

Supplement: Supplementary file 2 [file amt-9-2721-2016-supplement.zip › miniDOAS_Revaluation_basic_20150513/2_Results/miniDOAS_20150519-20150519_Eval201605131125/images/Rplot_miniDOAS_20150519-20150519_Eval201605131125_avg1_3.png]

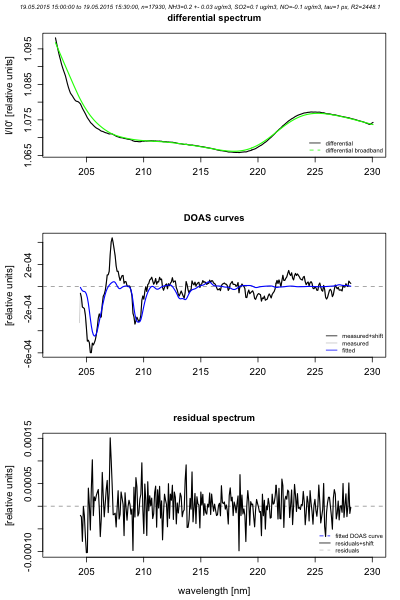

Supplement: Supplementary file 2 [file amt-9-2721-2016-supplement.zip › miniDOAS_Revaluation_basic_20150513/2_Results/miniDOAS_20150519-20150519_Eval201605131125/images/Rplot_miniDOAS_20150519-20150519_Eval201605131125_avg1_31.png]

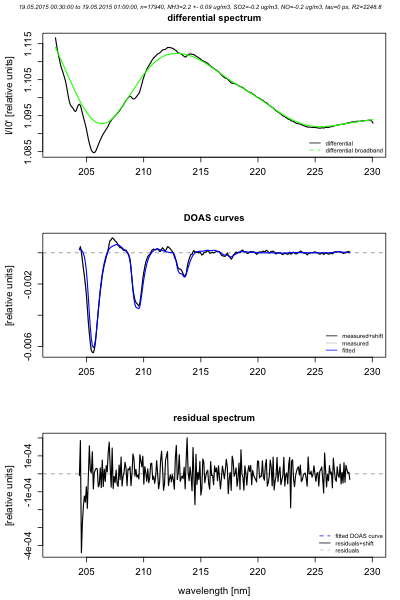

Supplement: Supplementary file 2 [file amt-9-2721-2016-supplement.zip › miniDOAS_Revaluation_basic_20150513/2_Results/miniDOAS_20150519-20150519_Eval201605131125/images/Rplot_miniDOAS_20150519-20150519_Eval201605131125_avg1_2.png]

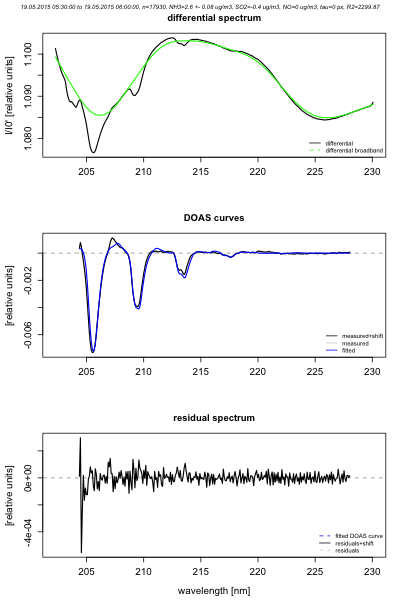

Supplement: Supplementary file 2 [file amt-9-2721-2016-supplement.zip › miniDOAS_Revaluation_basic_20150513/2_Results/miniDOAS_20150519-20150519_Eval201605131125/images/Rplot_miniDOAS_20150519-20150519_Eval201605131125_avg1_12.png]

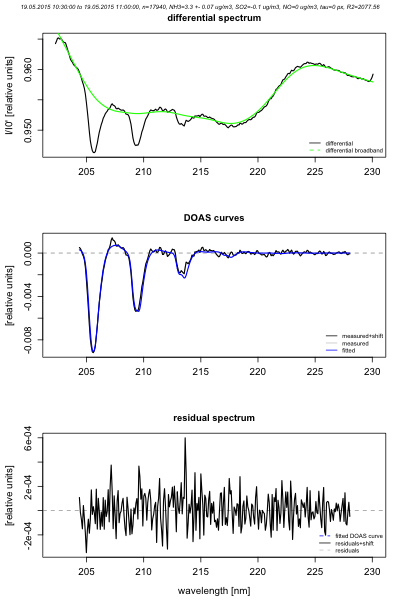

Supplement: Supplementary file 2 [file amt-9-2721-2016-supplement.zip › miniDOAS_Revaluation_basic_20150513/2_Results/miniDOAS_20150519-20150519_Eval201605131125/images/Rplot_miniDOAS_20150519-20150519_Eval201605131125_avg1_22.png]

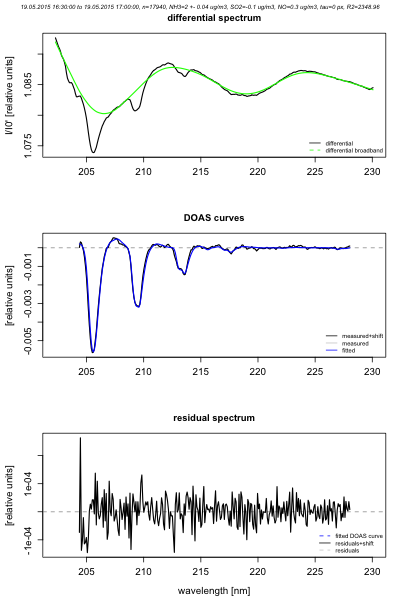

Supplement: Supplementary file 2 [file amt-9-2721-2016-supplement.zip › miniDOAS_Revaluation_basic_20150513/2_Results/miniDOAS_20150519-20150519_Eval201605131125/images/Rplot_miniDOAS_20150519-20150519_Eval201605131125_avg1_34.png]

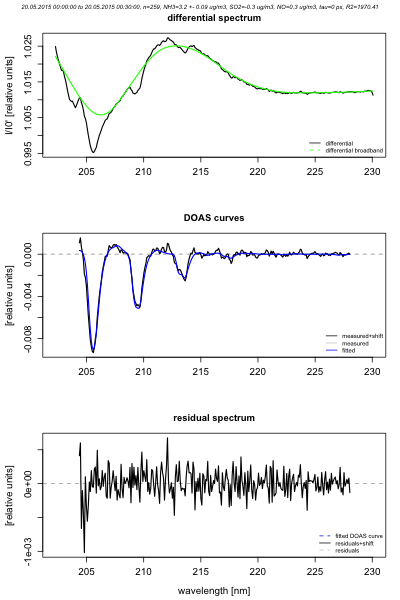

Supplement: Supplementary file 2 [file amt-9-2721-2016-supplement.zip › miniDOAS_Revaluation_basic_20150513/2_Results/miniDOAS_20150519-20150519_Eval201605131125/images/Rplot_miniDOAS_20150519-20150519_Eval201605131125_avg1_49.png]

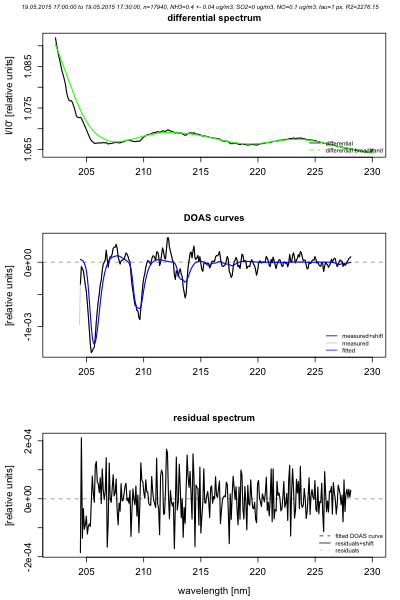

Supplement: Supplementary file 2 [file amt-9-2721-2016-supplement.zip › miniDOAS_Revaluation_basic_20150513/2_Results/miniDOAS_20150519-20150519_Eval201605131125/images/Rplot_miniDOAS_20150519-20150519_Eval201605131125_avg1_35.png]

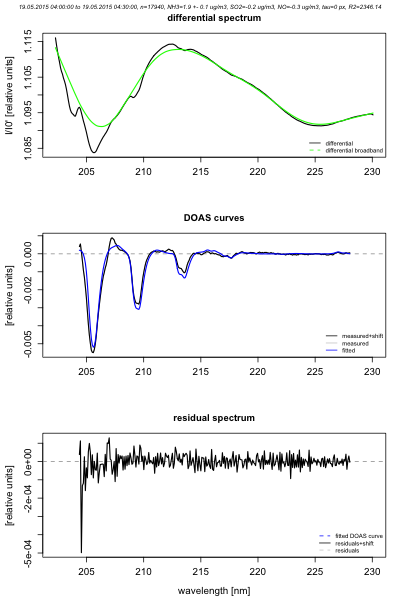

Supplement: Supplementary file 2 [file amt-9-2721-2016-supplement.zip › miniDOAS_Revaluation_basic_20150513/2_Results/miniDOAS_20150519-20150519_Eval201605131125/images/Rplot_miniDOAS_20150519-20150519_Eval201605131125_avg1_9.png]

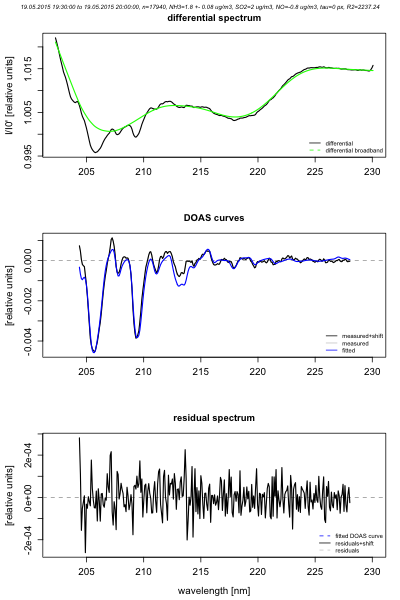

Supplement: Supplementary file 2 [file amt-9-2721-2016-supplement.zip › miniDOAS_Revaluation_basic_20150513/2_Results/miniDOAS_20150519-20150519_Eval201605131125/images/Rplot_miniDOAS_20150519-20150519_Eval201605131125_avg1_40.png]

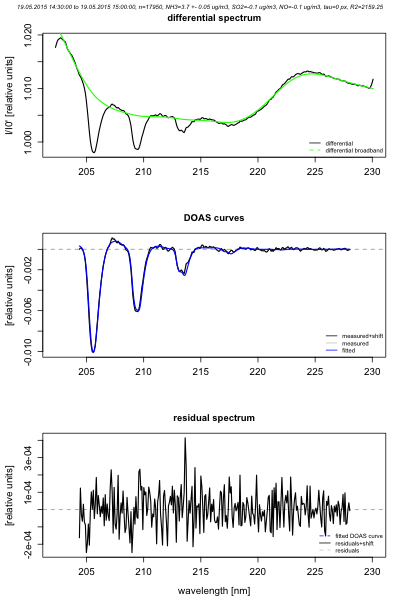

Supplement: Supplementary file 2 [file amt-9-2721-2016-supplement.zip › miniDOAS_Revaluation_basic_20150513/2_Results/miniDOAS_20150519-20150519_Eval201605131125/images/Rplot_miniDOAS_20150519-20150519_Eval201605131125_avg1_30.png]

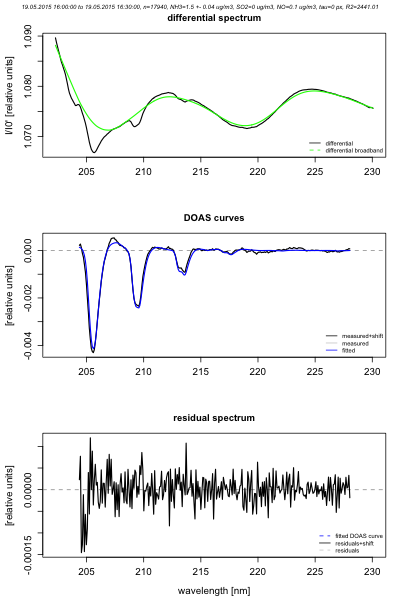

Supplement: Supplementary file 2 [file amt-9-2721-2016-supplement.zip › miniDOAS_Revaluation_basic_20150513/2_Results/miniDOAS_20150519-20150519_Eval201605131125/images/Rplot_miniDOAS_20150519-20150519_Eval201605131125_avg1_33.png]

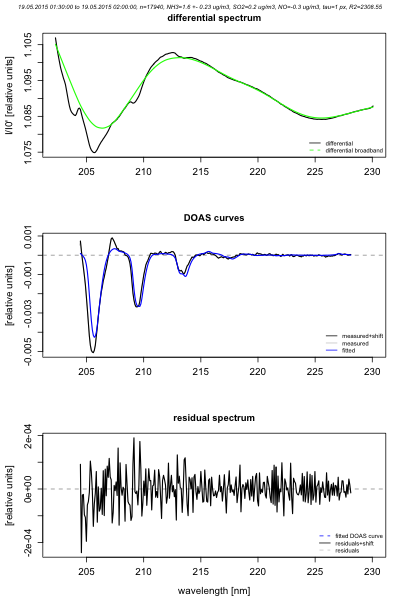

Supplement: Supplementary file 2 [file amt-9-2721-2016-supplement.zip › miniDOAS_Revaluation_basic_20150513/2_Results/miniDOAS_20150519-20150519_Eval201605131125/images/Rplot_miniDOAS_20150519-20150519_Eval201605131125_avg1_4.png]

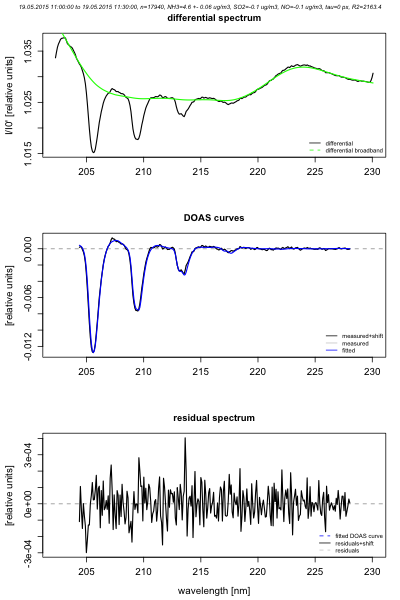

Supplement: Supplementary file 2 [file amt-9-2721-2016-supplement.zip › miniDOAS_Revaluation_basic_20150513/2_Results/miniDOAS_20150519-20150519_Eval201605131125/images/Rplot_miniDOAS_20150519-20150519_Eval201605131125_avg1_23.png]

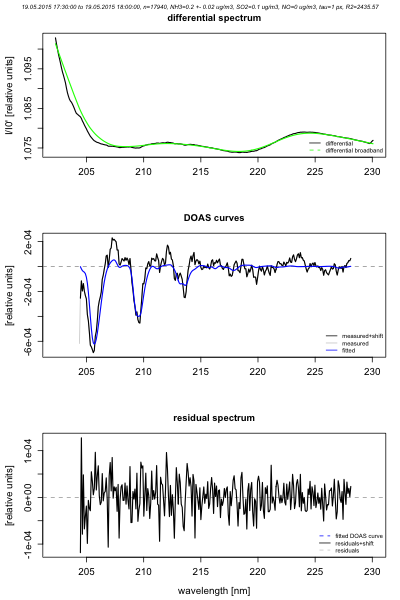

Supplement: Supplementary file 2 [file amt-9-2721-2016-supplement.zip › miniDOAS_Revaluation_basic_20150513/2_Results/miniDOAS_20150519-20150519_Eval201605131125/images/Rplot_miniDOAS_20150519-20150519_Eval201605131125_avg1_36.png]

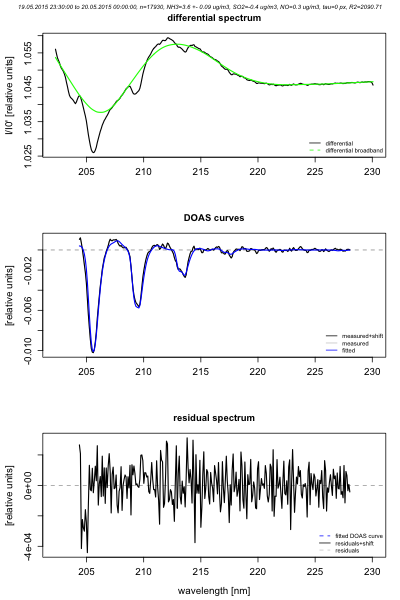

Supplement: Supplementary file 2 [file amt-9-2721-2016-supplement.zip › miniDOAS_Revaluation_basic_20150513/2_Results/miniDOAS_20150519-20150519_Eval201605131125/images/Rplot_miniDOAS_20150519-20150519_Eval201605131125_avg1_48.png]

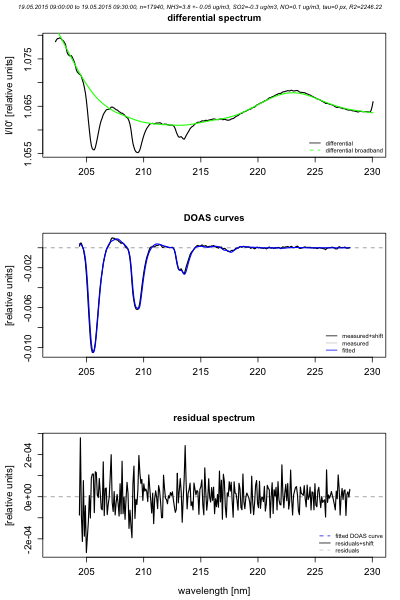

Supplement: Supplementary file 2 [file amt-9-2721-2016-supplement.zip › miniDOAS_Revaluation_basic_20150513/2_Results/miniDOAS_20150519-20150519_Eval201605131125/images/Rplot_miniDOAS_20150519-20150519_Eval201605131125_avg1_19.png]

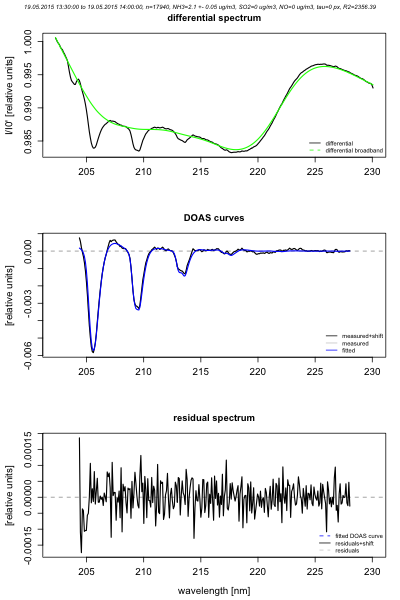

Supplement: Supplementary file 2 [file amt-9-2721-2016-supplement.zip › miniDOAS_Revaluation_basic_20150513/2_Results/miniDOAS_20150519-20150519_Eval201605131125/images/Rplot_miniDOAS_20150519-20150519_Eval201605131125_avg1_28.png]

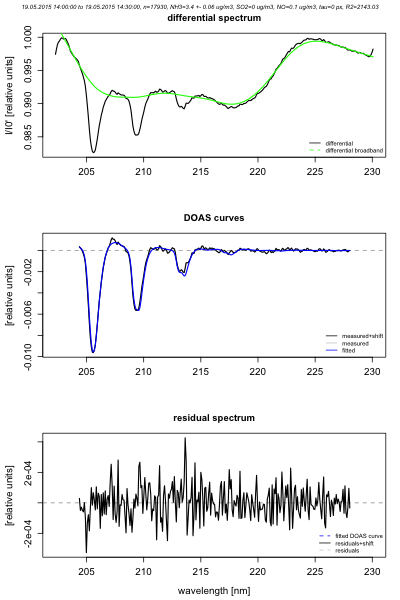

Supplement: Supplementary file 2 [file amt-9-2721-2016-supplement.zip › miniDOAS_Revaluation_basic_20150513/2_Results/miniDOAS_20150519-20150519_Eval201605131125/images/Rplot_miniDOAS_20150519-20150519_Eval201605131125_avg1_29.png]

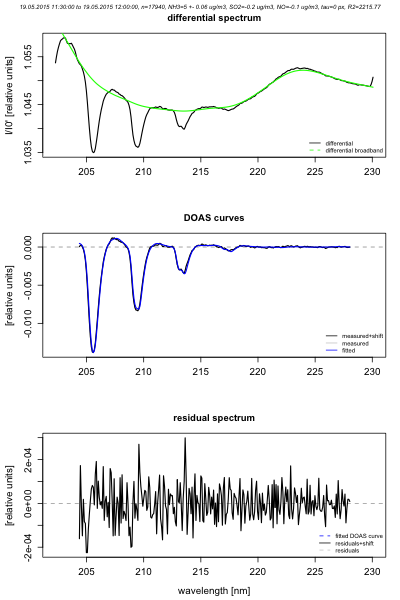

Supplement: Supplementary file 2 [file amt-9-2721-2016-supplement.zip › miniDOAS_Revaluation_basic_20150513/2_Results/miniDOAS_20150519-20150519_Eval201605131125/images/Rplot_miniDOAS_20150519-20150519_Eval201605131125_avg1_24.png]

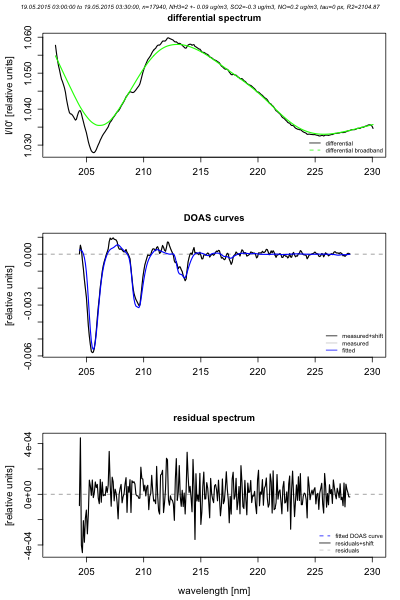

Supplement: Supplementary file 2 [file amt-9-2721-2016-supplement.zip › miniDOAS_Revaluation_basic_20150513/2_Results/miniDOAS_20150519-20150519_Eval201605131125/images/Rplot_miniDOAS_20150519-20150519_Eval201605131125_avg1_7.png]

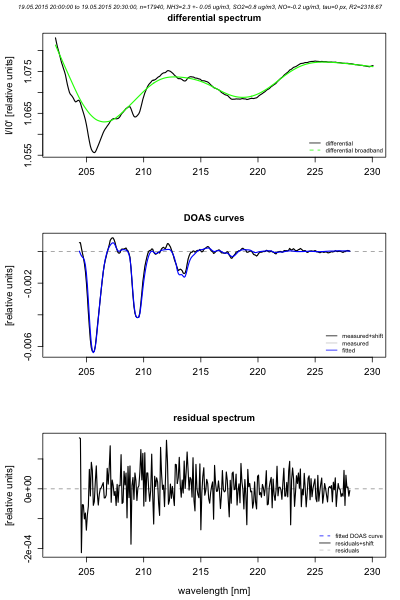

Supplement: Supplementary file 2 [file amt-9-2721-2016-supplement.zip › miniDOAS_Revaluation_basic_20150513/2_Results/miniDOAS_20150519-20150519_Eval201605131125/images/Rplot_miniDOAS_20150519-20150519_Eval201605131125_avg1_41.png]

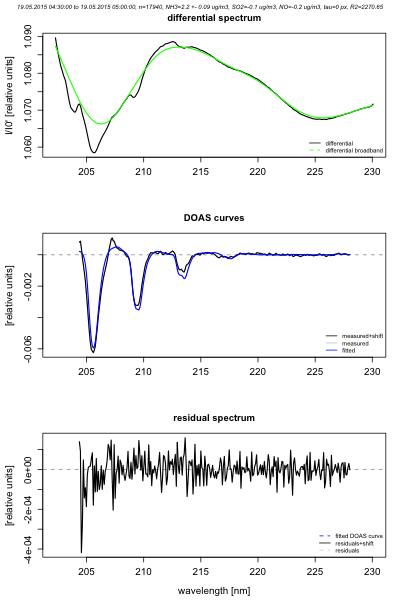

Supplement: Supplementary file 2 [file amt-9-2721-2016-supplement.zip › miniDOAS_Revaluation_basic_20150513/2_Results/miniDOAS_20150519-20150519_Eval201605131125/images/Rplot_miniDOAS_20150519-20150519_Eval201605131125_avg1_10.png]

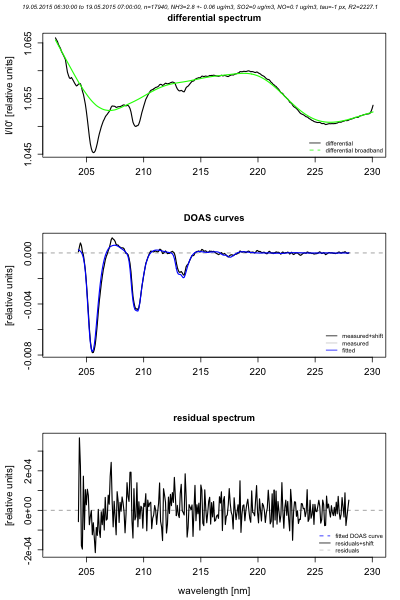

Supplement: Supplementary file 2 [file amt-9-2721-2016-supplement.zip › miniDOAS_Revaluation_basic_20150513/2_Results/miniDOAS_20150519-20150519_Eval201605131125/images/Rplot_miniDOAS_20150519-20150519_Eval201605131125_avg1_14.png]

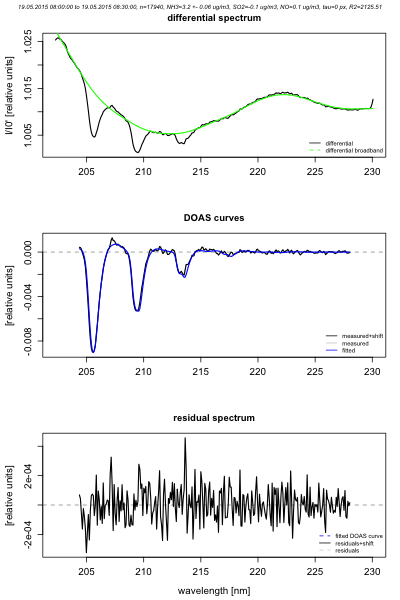

Supplement: Supplementary file 2 [file amt-9-2721-2016-supplement.zip › miniDOAS_Revaluation_basic_20150513/2_Results/miniDOAS_20150519-20150519_Eval201605131125/images/Rplot_miniDOAS_20150519-20150519_Eval201605131125_avg1_17.png]

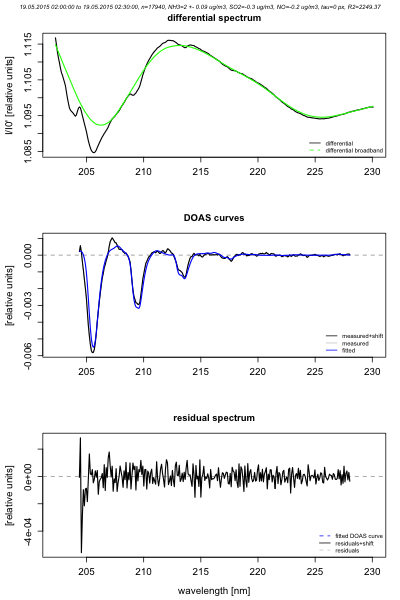

Supplement: Supplementary file 2 [file amt-9-2721-2016-supplement.zip › miniDOAS_Revaluation_basic_20150513/2_Results/miniDOAS_20150519-20150519_Eval201605131125/images/Rplot_miniDOAS_20150519-20150519_Eval201605131125_avg1_5.png]

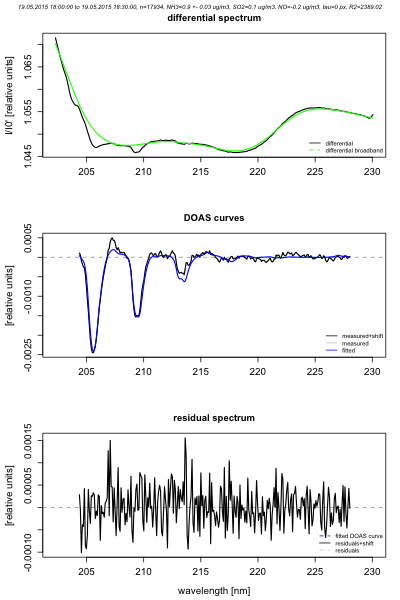

Supplement: Supplementary file 2 [file amt-9-2721-2016-supplement.zip › miniDOAS_Revaluation_basic_20150513/2_Results/miniDOAS_20150519-20150519_Eval201605131125/images/Rplot_miniDOAS_20150519-20150519_Eval201605131125_avg1_37.png]

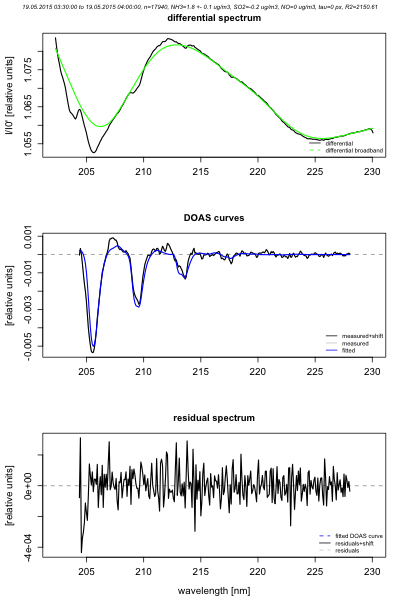

Supplement: Supplementary file 2 [file amt-9-2721-2016-supplement.zip › miniDOAS_Revaluation_basic_20150513/2_Results/miniDOAS_20150519-20150519_Eval201605131125/images/Rplot_miniDOAS_20150519-20150519_Eval201605131125_avg1_8.png]

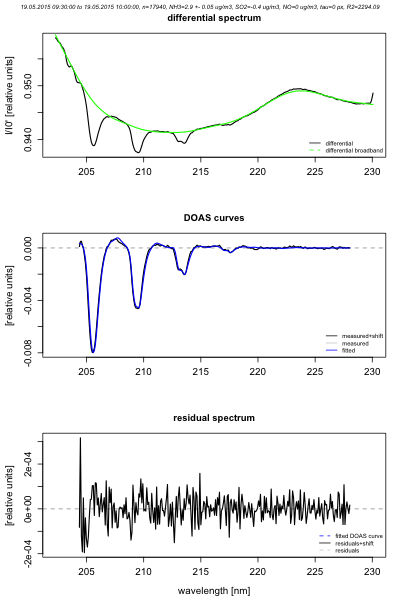

Supplement: Supplementary file 2 [file amt-9-2721-2016-supplement.zip › miniDOAS_Revaluation_basic_20150513/2_Results/miniDOAS_20150519-20150519_Eval201605131125/images/Rplot_miniDOAS_20150519-20150519_Eval201605131125_avg1_20.png]

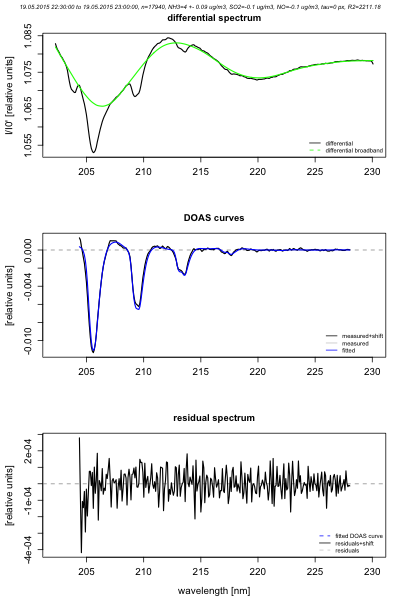

Supplement: Supplementary file 2 [file amt-9-2721-2016-supplement.zip › miniDOAS_Revaluation_basic_20150513/2_Results/miniDOAS_20150519-20150519_Eval201605131125/images/Rplot_miniDOAS_20150519-20150519_Eval201605131125_avg1_46.png]

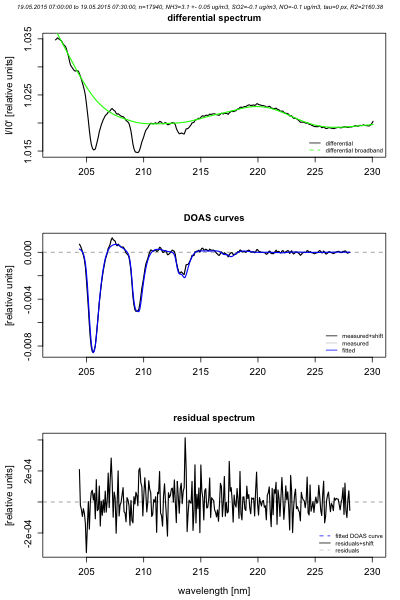

Supplement: Supplementary file 2 [file amt-9-2721-2016-supplement.zip › miniDOAS_Revaluation_basic_20150513/2_Results/miniDOAS_20150519-20150519_Eval201605131125/images/Rplot_miniDOAS_20150519-20150519_Eval201605131125_avg1_15.png]

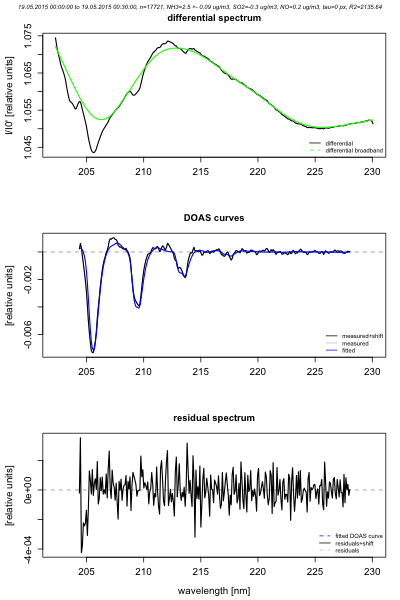

Supplement: Supplementary file 2 [file amt-9-2721-2016-supplement.zip › miniDOAS_Revaluation_basic_20150513/2_Results/miniDOAS_20150519-20150519_Eval201605131125/images/Rplot_miniDOAS_20150519-20150519_Eval201605131125_avg1_1.png]

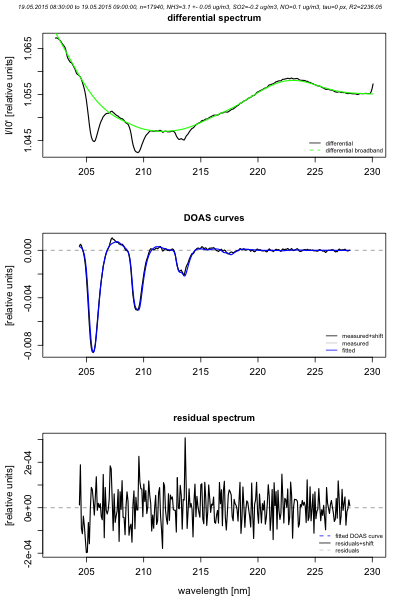

Supplement: Supplementary file 2 [file amt-9-2721-2016-supplement.zip › miniDOAS_Revaluation_basic_20150513/2_Results/miniDOAS_20150519-20150519_Eval201605131125/images/Rplot_miniDOAS_20150519-20150519_Eval201605131125_avg1_18.png]

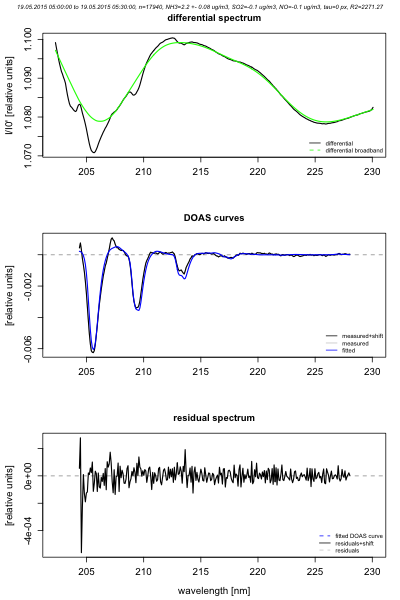

Supplement: Supplementary file 2 [file amt-9-2721-2016-supplement.zip › miniDOAS_Revaluation_basic_20150513/2_Results/miniDOAS_20150519-20150519_Eval201605131125/images/Rplot_miniDOAS_20150519-20150519_Eval201605131125_avg1_11.png]

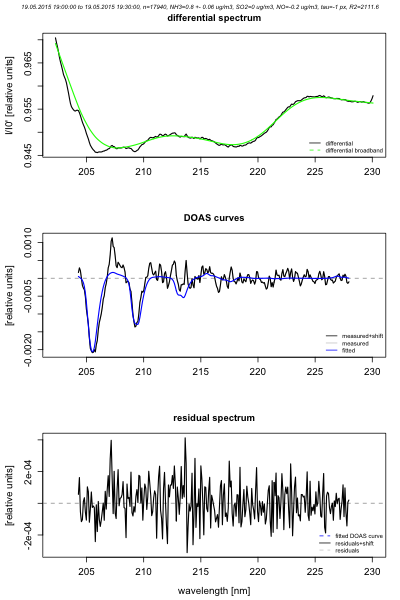

Supplement: Supplementary file 2 [file amt-9-2721-2016-supplement.zip › miniDOAS_Revaluation_basic_20150513/2_Results/miniDOAS_20150519-20150519_Eval201605131125/images/Rplot_miniDOAS_20150519-20150519_Eval201605131125_avg1_39.png]

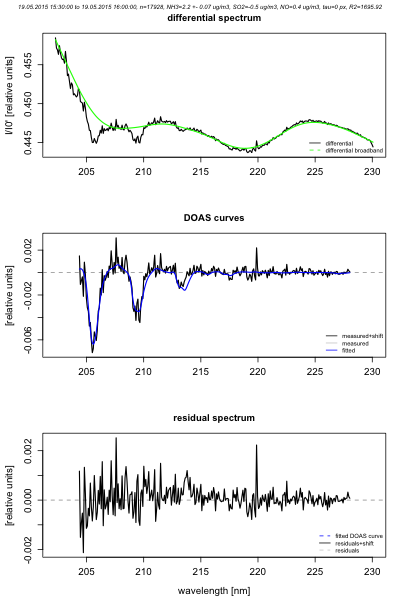

Supplement: Supplementary file 2 [file amt-9-2721-2016-supplement.zip › miniDOAS_Revaluation_basic_20150513/2_Results/miniDOAS_20150519-20150519_Eval201605131125/images/Rplot_miniDOAS_20150519-20150519_Eval201605131125_avg1_32.png]

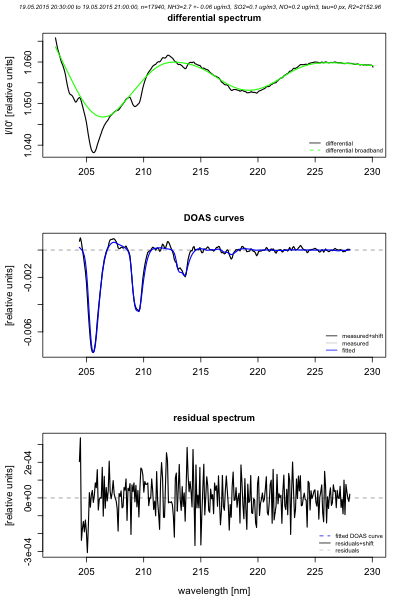

Supplement: Supplementary file 2 [file amt-9-2721-2016-supplement.zip › miniDOAS_Revaluation_basic_20150513/2_Results/miniDOAS_20150519-20150519_Eval201605131125/images/Rplot_miniDOAS_20150519-20150519_Eval201605131125_avg1_42.png]

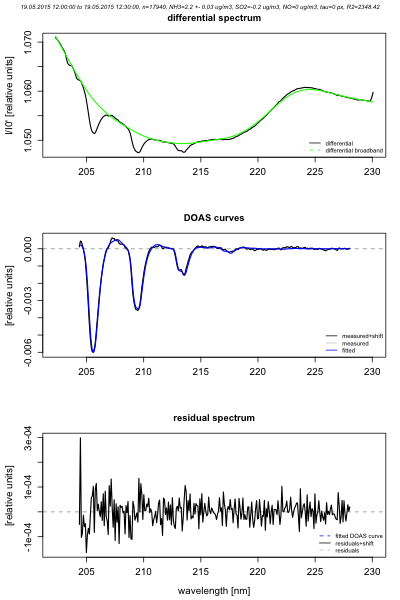

Supplement: Supplementary file 2 [file amt-9-2721-2016-supplement.zip › miniDOAS_Revaluation_basic_20150513/2_Results/miniDOAS_20150519-20150519_Eval201605131125/images/Rplot_miniDOAS_20150519-20150519_Eval201605131125_avg1_25.png]

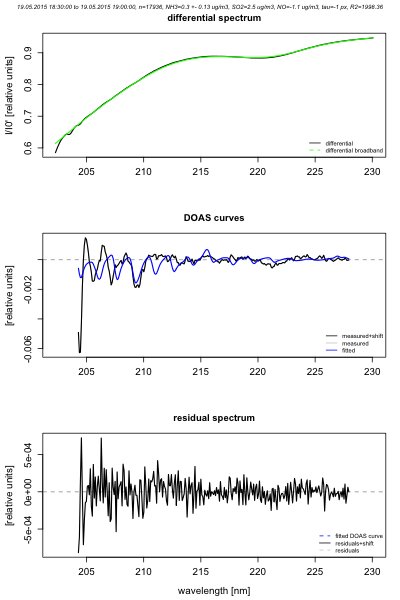

Supplement: Supplementary file 2 [file amt-9-2721-2016-supplement.zip › miniDOAS_Revaluation_basic_20150513/2_Results/miniDOAS_20150519-20150519_Eval201605131125/images/Rplot_miniDOAS_20150519-20150519_Eval201605131125_avg1_38.png]

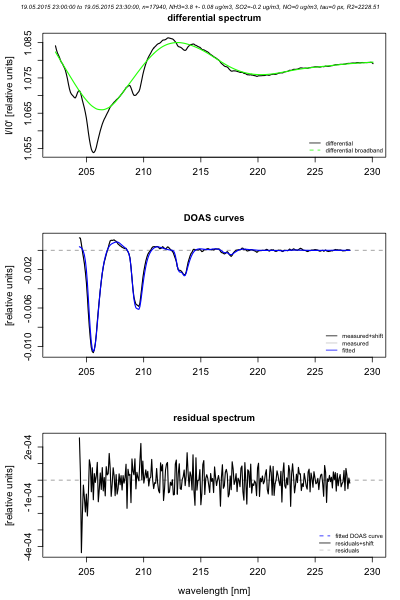

Supplement: Supplementary file 2 [file amt-9-2721-2016-supplement.zip › miniDOAS_Revaluation_basic_20150513/2_Results/miniDOAS_20150519-20150519_Eval201605131125/images/Rplot_miniDOAS_20150519-20150519_Eval201605131125_avg1_47.png]

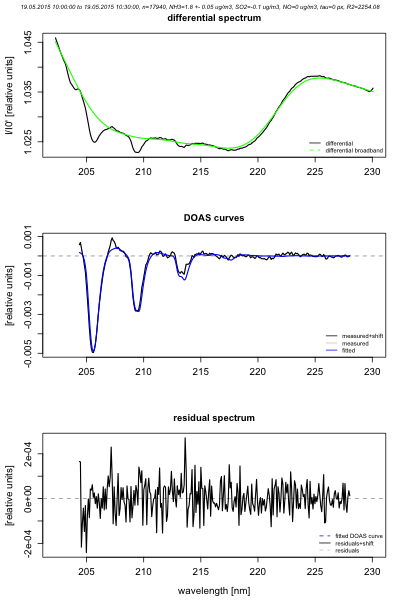

Supplement: Supplementary file 2 [file amt-9-2721-2016-supplement.zip › miniDOAS_Revaluation_basic_20150513/2_Results/miniDOAS_20150519-20150519_Eval201605131125/images/Rplot_miniDOAS_20150519-20150519_Eval201605131125_avg1_21.png]

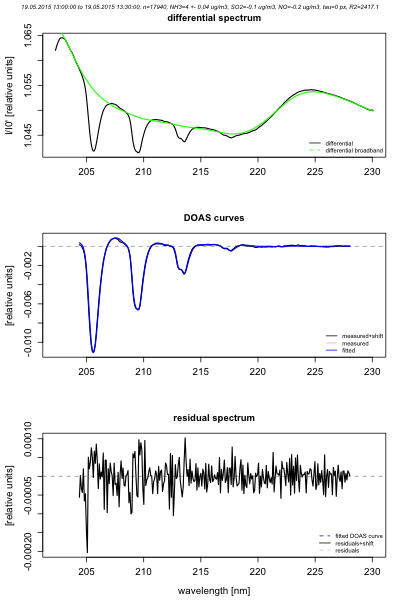

Supplement: Supplementary file 2 [file amt-9-2721-2016-supplement.zip › miniDOAS_Revaluation_basic_20150513/2_Results/miniDOAS_20150519-20150519_Eval201605131125/images/Rplot_miniDOAS_20150519-20150519_Eval201605131125_avg1_27.png]

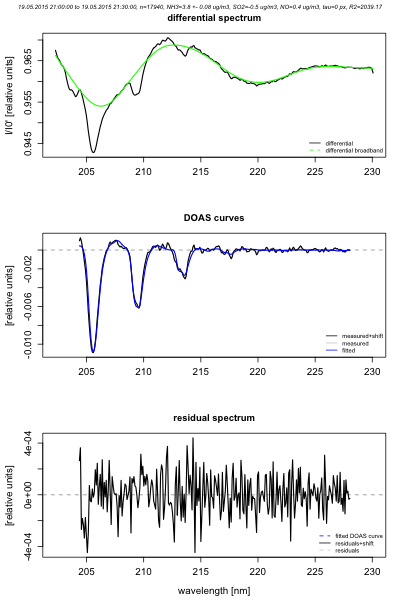

Supplement: Supplementary file 2 [file amt-9-2721-2016-supplement.zip › miniDOAS_Revaluation_basic_20150513/2_Results/miniDOAS_20150519-20150519_Eval201605131125/images/Rplot_miniDOAS_20150519-20150519_Eval201605131125_avg1_43.png]

# miniDOAS reference, calibration, & dark spectra

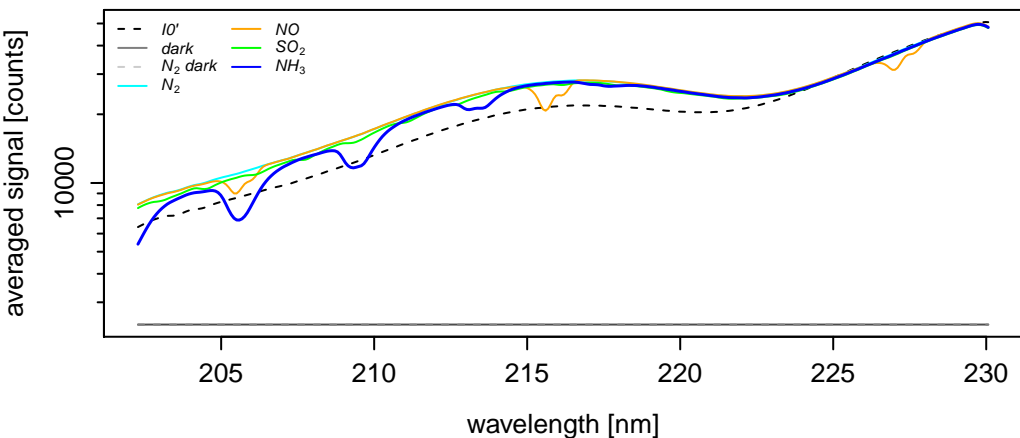

## calibration diffspec

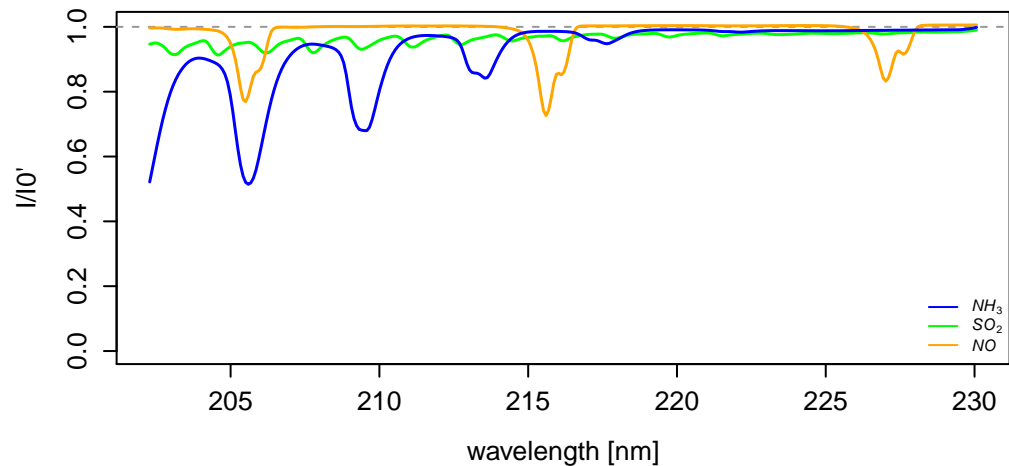

## calibration DOAS curves

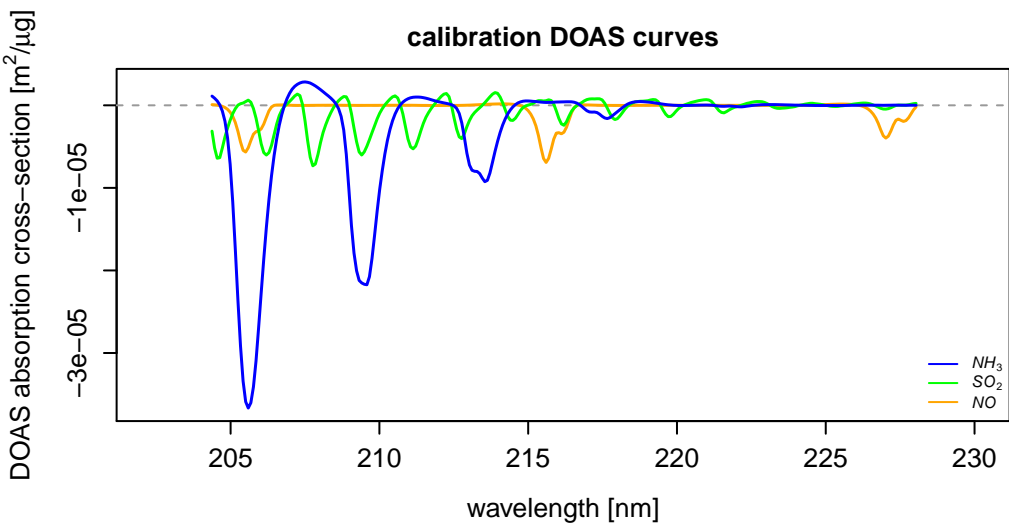

Supplement: Supplementary file 2 [file amt-9-2721-2016-supplement.zip › miniDOAS_Revaluation_basic_20150513/2_Results/miniDOAS_20150519-20150519_Eval201605131125/miniDOAS-calrefs-20150519-20150519-Eval201605131125.pdf]
